# Supplementary material
Source: publisher figshare collection journal article supplement (https://acs.figshare.com/ndownloader/files/8252906)
Supplement: Supplementary file 1 [file 8252906]

data_ty-1102
_audit_creation_date              2016-11-08
_audit_creation_method
;
Olex2 1.2-alpha
(compiled 2016.10.10 svn.r3347 for OlexSys, GUI svn.r5252)
;
_publ_contact_author_address      ?
_publ_contact_author_email        ?
_publ_contact_author_id_orcid     ?
_publ_contact_author_name         ''
_publ_contact_author_phone        ?
_publ_section_references
;
Dolomanov, O.V., Bourhis, L.J., Gildea, R.J, Howard, J.A.K. & Puschmann, H.
 (2009), J. Appl. Cryst. 42, 339-341.

Sheldrick, G.M. (2015). Acta Cryst. A71, 3-8.

Sheldrick, G.M. (2015). Acta Cryst. C71, 3-8.
;
_chemical_name_common             ?
_chemical_name_systematic         ?
_chemical_formula_moiety          'C12 H13 Cl3 O'
_chemical_formula_sum             'C12 H13 Cl3 O'
_chemical_formula_weight          279.57
_chemical_absolute_configuration  ad
_chemical_melting_point           ?
loop_
  _atom_type_symbol
  _atom_type_description
  _atom_type_scat_dispersion_real
  _atom_type_scat_dispersion_imag
  _atom_type_scat_source
 'C' 'C' 0.0033 0.0016 'International Tables Vol C Tables 4.2.6.8 and 6.1.1.4'
 'H' 'H' 0.0000 0.0000 'International Tables Vol C Tables 4.2.6.8 and 6.1.1.4'
 'Cl' 'Cl' 0.1484 0.1585 'International Tables Vol C Tables 4.2.6.8 and 6.1.1.4'
 'O' 'O' 0.0106 0.0060 'International Tables Vol C Tables 4.2.6.8 and 6.1.1.4'

_shelx_space_group_comment
;
The symmetry employed for this shelxl refinement is uniquely defined
by the following loop, which should always be used as a source of
symmetry information in preference to the above space-group names.
They are only intended as comments.
;
_space_group_crystal_system       'monoclinic'
_space_group_IT_number            4
_space_group_name_H-M_alt         'P 1 21 1'
_space_group_name_Hall            'P 2yb'
loop_
  _space_group_symop_operation_xyz
 'x, y, z'
 '-x, y+1/2, -z'

_cell_length_a                    9.8618(4)
_cell_length_b                    6.3632(2)
_cell_length_c                    11.4050(6)
_cell_angle_alpha                 90
_cell_angle_beta                  112.453(5)
_cell_angle_gamma                 90
_cell_volume                      661.44(5)
_cell_formula_units_Z             2
_cell_measurement_reflns_used     5841
_cell_measurement_temperature     293(2)
_cell_measurement_theta_min     3.8960
_cell_measurement_theta_max     25.5220
_shelx_estimated_absorpt_T_max    ?
_shelx_estimated_absorpt_T_min    ?
_exptl_absorpt_coefficient_mu     0.669
_exptl_absorpt_correction_T_min                   0.86875
_exptl_absorpt_correction_T_max                   1.00000
_exptl_absorpt_correction_type            multi-scan
_exptl_absorpt_process_details
;
CrysAlisPro 1.171.38.41k (Rigaku Oxford Diffraction, 2015)
Empirical absorption correction using spherical harmonics,
 implemented in SCALE3 ABSPACK scaling algorithm.
;
_exptl_absorpt_special_details    ?
_exptl_crystal_colour             Colorless
_exptl_crystal_density_diffrn     1.404
_exptl_crystal_density_meas       ?
_exptl_crystal_density_method     ?
_exptl_crystal_description        Block
_exptl_crystal_F_000              288
_exptl_crystal_size_max           0.4
_exptl_crystal_size_mid           0.35
_exptl_crystal_size_min           0.25
_exptl_transmission_factor_max    ?
_exptl_transmission_factor_min    ?
_diffrn_reflns_av_R_equivalents   0.0293
_diffrn_reflns_av_unetI/netI      0.0245
_diffrn_reflns_Laue_measured_fraction_full 0.998
_diffrn_reflns_Laue_measured_fraction_max 0.921
_diffrn_reflns_limit_h_max        13
_diffrn_reflns_limit_h_min        -12
_diffrn_reflns_limit_k_max        8
_diffrn_reflns_limit_k_min        -8
_diffrn_reflns_limit_l_max        15
_diffrn_reflns_limit_l_min        -15
_diffrn_reflns_number             14569
_diffrn_reflns_point_group_measured_fraction_full 0.999
_diffrn_reflns_point_group_measured_fraction_max 0.888
_diffrn_reflns_theta_full         26.000
_diffrn_reflns_theta_max          29.180
_diffrn_reflns_theta_min          3.469
_diffrn_ambient_temperature       293(2)
_diffrn_detector_area_resol_mean  ?
_diffrn_measured_fraction_theta_full 0.998
_diffrn_measured_fraction_theta_max 0.921
_diffrn_measurement_device_type   'SuperNova, Single source at offset, Eos'
_diffrn_measurement_method        '\w scans'
_diffrn_radiation_type            MoK\a
_diffrn_radiation_wavelength      0.71073
_diffrn_source                    'micro-focus sealed X-ray tube'
_reflns_Friedel_coverage          0.777
_reflns_Friedel_fraction_full     1.000
_reflns_Friedel_fraction_max      0.850
_reflns_number_gt                 2781
_reflns_number_total              3193
_reflns_special_details
;
 Reflections were merged by SHELXL according to the crystal
 class for the calculation of statistics and refinement.
 
 _reflns_Friedel_fraction is defined as the number of unique
 Friedel pairs measured divided by the number that would be
 possible theoretically, ignoring centric projections and
 systematic absences.
;
_reflns_threshold_expression      'I > 2\s(I)'
_computing_cell_refinement        ?
_computing_data_collection        ?
_computing_data_reduction         ?
_computing_molecular_graphics     'Olex2 (Dolomanov et al., 2009)'
_computing_publication_material   'Olex2 (Dolomanov et al., 2009)'
_computing_structure_refinement   'ShelXL (Sheldrick, 2015)'
_computing_structure_solution     'ShelXT (Sheldrick, 2015)'
_refine_diff_density_max          0.282
_refine_diff_density_min          -0.274
_refine_diff_density_rms          0.044
_refine_ls_abs_structure_details
;
 Flack x determined using 1095 quotients [(I+)-(I-)]/[(I+)+(I-)]
 (Parsons, Flack and Wagner, Acta Cryst. B69 (2013) 249-259).
;
_refine_ls_abs_structure_Flack    -0.01(2)
_refine_ls_extinction_coef        .
_refine_ls_extinction_method      none
_refine_ls_goodness_of_fit_ref    1.046
_refine_ls_hydrogen_treatment     constr
_refine_ls_matrix_type            full
_refine_ls_number_parameters      146
_refine_ls_number_reflns          3193
_refine_ls_number_restraints      1
_refine_ls_R_factor_all           0.0450
_refine_ls_R_factor_gt            0.0354
_refine_ls_restrained_S_all       1.045
_refine_ls_shift/su_max           0.000
_refine_ls_shift/su_mean          0.000
_refine_ls_structure_factor_coef  Fsqd
_refine_ls_weighting_details
'w=1/[\s^2^(Fo^2^)+(0.0379P)^2^+0.1511P] where P=(Fo^2^+2Fc^2^)/3'
_refine_ls_weighting_scheme       calc
_refine_ls_wR_factor_gt           0.0800
_refine_ls_wR_factor_ref          0.0874
_refine_special_details           ?
_olex2_refinement_description
;
1. Fixed Uiso
 At 1.2 times of:
  All C(H) groups, All C(H,H) groups
 At 1.5 times of:
  All C(H,H,H) groups
2.a Ternary CH refined with riding coordinates:
 C005(H005), C007(H007), C009(H009)
2.b Secondary CH2 refined with riding coordinates:
 C00A(H00A,H00B)
2.c Aromatic/amide H refined with riding coordinates:
 C00B(H00C), C00C(H00D), C00D(H00E), C00E(H00F), C00F(H00G)
2.d Idealised Me refined as rotating group:
 C00G(H00H,H00I,H00J)
;
_atom_sites_solution_hydrogens    geom
_atom_sites_solution_primary      dual
_atom_sites_solution_secondary    ?
loop_
  _atom_site_label
  _atom_site_type_symbol
  _atom_site_fract_x
  _atom_site_fract_y
  _atom_site_fract_z
  _atom_site_U_iso_or_equiv
  _atom_site_adp_type
  _atom_site_occupancy
  _atom_site_site_symmetry_order
  _atom_site_calc_flag
  _atom_site_refinement_flags_posn
  _atom_site_refinement_flags_adp
  _atom_site_refinement_flags_occupancy
  _atom_site_disorder_assembly
  _atom_site_disorder_group
 Cl01 Cl 0.41772(8) 0.26917(15) 0.34244(8) 0.0565(2) Uani 1 1 d . . . . .
 Cl02 Cl 0.67652(9) 0.19886(13) 0.17146(10) 0.0627(3) Uani 1 1 d . . . . .
 Cl03 Cl 0.47980(10) 0.74859(13) 0.25921(11) 0.0699(3) Uani 1 1 d . . . . .
 O004 O 0.7010(2) 0.7113(4) 0.1119(2) 0.0643(7) Uani 1 1 d . . . . .
 C005 C 0.3801(3) 0.3514(5) 0.1821(3) 0.0417(6) Uani 1 1 d . . . . .
 H005 H 0.3901 0.2278 0.1348 0.050 Uiso 1 1 calc R . . . .
 C006 C 0.9088(3) 0.6120(5) 0.2901(3) 0.0432(7) Uani 1 1 d . . . . .
 C007 C 0.4915(3) 0.5124(5) 0.1785(3) 0.0420(6) Uani 1 1 d . . . . .
 H007 H 0.4687 0.5481 0.0894 0.050 Uiso 1 1 calc R . . . .
 C008 C 0.7520(3) 0.6021(5) 0.2053(3) 0.0433(7) Uani 1 1 d . . . . .
 C009 C 0.6512(3) 0.4460(5) 0.2363(3) 0.0405(7) Uani 1 1 d . . . . .
 H009 H 0.6822 0.4335 0.3285 0.049 Uiso 1 1 calc R . . . .
 C00A C 0.2222(3) 0.4278(6) 0.1202(3) 0.0505(8) Uani 1 1 d . . . . .
 H00A H 0.2070 0.5404 0.1712 0.061 Uiso 1 1 calc R . . . .
 H00B H 0.2069 0.4852 0.0373 0.061 Uiso 1 1 calc R . . . .
 C00B C 0.9908(4) 0.7812(6) 0.2768(3) 0.0548(8) Uani 1 1 d . . . . .
 H00C H 0.9463 0.8846 0.2168 0.066 Uiso 1 1 calc R . . . .
 C00C C 0.9763(4) 0.4601(6) 0.3803(3) 0.0551(9) Uani 1 1 d . . . . .
 H00D H 0.9221 0.3480 0.3917 0.066 Uiso 1 1 calc R . . . .
 C00D C 1.1251(4) 0.4752(8) 0.4539(4) 0.0672(11) Uani 1 1 d . . . . .
 H00E H 1.1710 0.3713 0.5131 0.081 Uiso 1 1 calc R . . . .
 C00E C 1.2045(4) 0.6426(8) 0.4395(4) 0.0640(11) Uani 1 1 d . . . . .
 H00F H 1.3041 0.6522 0.4891 0.077 Uiso 1 1 calc R . . . .
 C00F C 1.1374(4) 0.7965(7) 0.3521(4) 0.0673(10) Uani 1 1 d . . . . .
 H00G H 1.1914 0.9113 0.3438 0.081 Uiso 1 1 calc R . . . .
 C00G C 0.1095(4) 0.2580(8) 0.1049(4) 0.0751(11) Uani 1 1 d . . . . .
 H00H H 0.0131 0.3128 0.0582 0.113 Uiso 1 1 calc GR . . . .
 H00I H 0.1159 0.2121 0.1870 0.113 Uiso 1 1 calc GR . . . .
 H00J H 0.1279 0.1414 0.0597 0.113 Uiso 1 1 calc GR . . . .

loop_
  _atom_site_aniso_label
  _atom_site_aniso_U_11
  _atom_site_aniso_U_22
  _atom_site_aniso_U_33
  _atom_site_aniso_U_23
  _atom_site_aniso_U_13
  _atom_site_aniso_U_12
 Cl01 0.0434(4) 0.0667(6) 0.0577(4) 0.0134(4) 0.0172(3) -0.0006(4)
 Cl02 0.0463(4) 0.0496(5) 0.0893(7) -0.0180(4) 0.0225(4) 0.0013(4)
 Cl03 0.0634(5) 0.0402(4) 0.1157(8) -0.0168(5) 0.0448(5) -0.0046(4)
 O004 0.0511(12) 0.0752(18) 0.0620(14) 0.0243(14) 0.0164(11) -0.0072(13)
 C005 0.0374(14) 0.0414(16) 0.0452(15) -0.0024(12) 0.0145(12) -0.0014(12)
 C006 0.0391(15) 0.0504(17) 0.0445(15) -0.0018(14) 0.0209(12) -0.0032(13)
 C007 0.0371(14) 0.0391(16) 0.0507(17) 0.0008(13) 0.0180(13) 0.0006(12)
 C008 0.0420(15) 0.0434(16) 0.0487(16) 0.0000(14) 0.0219(13) -0.0033(13)
 C009 0.0366(14) 0.0359(16) 0.0485(16) -0.0021(12) 0.0159(13) -0.0016(12)
 C00A 0.0363(15) 0.057(2) 0.0548(18) 0.0016(16) 0.0132(14) 0.0008(14)
 C00B 0.0497(16) 0.056(2) 0.0645(19) -0.0020(18) 0.0279(14) -0.0085(16)
 C00C 0.0430(17) 0.067(2) 0.055(2) 0.0055(17) 0.0181(15) -0.0042(16)
 C00D 0.0480(19) 0.093(3) 0.055(2) 0.008(2) 0.0126(17) 0.006(2)
 C00E 0.0347(15) 0.097(3) 0.058(2) -0.022(2) 0.0143(14) -0.0115(18)
 C00F 0.0495(18) 0.081(3) 0.078(2) -0.017(2) 0.0318(18) -0.023(2)
 C00G 0.0391(16) 0.083(3) 0.095(3) 0.004(3) 0.0162(17) -0.012(2)

_geom_special_details
;
 All esds (except the esd in the dihedral angle between two l.s. planes)
 are estimated using the full covariance matrix.  The cell esds are taken
 into account individually in the estimation of esds in distances, angles
 and torsion angles; correlations between esds in cell parameters are only
 used when they are defined by crystal symmetry.  An approximate (isotropic)
 treatment of cell esds is used for estimating esds involving l.s. planes.
;
loop_
  _geom_bond_atom_site_label_1
  _geom_bond_atom_site_label_2
  _geom_bond_distance
  _geom_bond_site_symmetry_2
  _geom_bond_publ_flag
 Cl01 C005 1.799(3) . ?
 Cl02 C009 1.796(3) . ?
 Cl03 C007 1.789(3) . ?
 O004 C008 1.209(4) . ?
 C005 H005 0.9800 . ?
 C005 C007 1.514(4) . ?
 C005 C00A 1.523(4) . ?
 C006 C008 1.479(4) . ?
 C006 C00B 1.389(5) . ?
 C006 C00C 1.383(5) . ?
 C007 H007 0.9800 . ?
 C007 C009 1.517(4) . ?
 C008 C009 1.539(4) . ?
 C009 H009 0.9800 . ?
 C00A H00A 0.9700 . ?
 C00A H00B 0.9700 . ?
 C00A C00G 1.511(5) . ?
 C00B H00C 0.9300 . ?
 C00B C00F 1.374(5) . ?
 C00C H00D 0.9300 . ?
 C00C C00D 1.388(5) . ?
 C00D H00E 0.9300 . ?
 C00D C00E 1.368(6) . ?
 C00E H00F 0.9300 . ?
 C00E C00F 1.374(6) . ?
 C00F H00G 0.9300 . ?
 C00G H00H 0.9600 . ?
 C00G H00I 0.9600 . ?
 C00G H00J 0.9600 . ?

loop_
  _geom_angle_atom_site_label_1
  _geom_angle_atom_site_label_2
  _geom_angle_atom_site_label_3
  _geom_angle
  _geom_angle_site_symmetry_1
  _geom_angle_site_symmetry_3
  _geom_angle_publ_flag
 Cl01 C005 H005 107.5 . . ?
 C007 C005 Cl01 110.8(2) . . ?
 C007 C005 H005 107.5 . . ?
 C007 C005 C00A 113.3(3) . . ?
 C00A C005 Cl01 110.0(2) . . ?
 C00A C005 H005 107.5 . . ?
 C00B C006 C008 117.9(3) . . ?
 C00C C006 C008 122.9(3) . . ?
 C00C C006 C00B 119.2(3) . . ?
 Cl03 C007 H007 107.7 . . ?
 C005 C007 Cl03 111.4(2) . . ?
 C005 C007 H007 107.7 . . ?
 C005 C007 C009 116.3(2) . . ?
 C009 C007 Cl03 105.68(19) . . ?
 C009 C007 H007 107.7 . . ?
 O004 C008 C006 122.0(3) . . ?
 O004 C008 C009 119.1(3) . . ?
 C006 C008 C009 118.9(3) . . ?
 Cl02 C009 H009 109.6 . . ?
 C007 C009 Cl02 110.45(19) . . ?
 C007 C009 C008 112.0(2) . . ?
 C007 C009 H009 109.6 . . ?
 C008 C009 Cl02 105.5(2) . . ?
 C008 C009 H009 109.6 . . ?
 C005 C00A H00A 108.8 . . ?
 C005 C00A H00B 108.8 . . ?
 H00A C00A H00B 107.7 . . ?
 C00G C00A C005 113.7(3) . . ?
 C00G C00A H00A 108.8 . . ?
 C00G C00A H00B 108.8 . . ?
 C006 C00B H00C 119.9 . . ?
 C00F C00B C006 120.3(4) . . ?
 C00F C00B H00C 119.9 . . ?
 C006 C00C H00D 120.0 . . ?
 C006 C00C C00D 119.9(3) . . ?
 C00D C00C H00D 120.0 . . ?
 C00C C00D H00E 119.9 . . ?
 C00E C00D C00C 120.2(4) . . ?
 C00E C00D H00E 119.9 . . ?
 C00D C00E H00F 119.9 . . ?
 C00D C00E C00F 120.2(3) . . ?
 C00F C00E H00F 119.9 . . ?
 C00B C00F H00G 119.9 . . ?
 C00E C00F C00B 120.2(4) . . ?
 C00E C00F H00G 119.9 . . ?
 C00A C00G H00H 109.5 . . ?
 C00A C00G H00I 109.5 . . ?
 C00A C00G H00J 109.5 . . ?
 H00H C00G H00I 109.5 . . ?
 H00H C00G H00J 109.5 . . ?
 H00I C00G H00J 109.5 . . ?

loop_
  _geom_torsion_atom_site_label_1
  _geom_torsion_atom_site_label_2
  _geom_torsion_atom_site_label_3
  _geom_torsion_atom_site_label_4
  _geom_torsion
  _geom_torsion_site_symmetry_1
  _geom_torsion_site_symmetry_2
  _geom_torsion_site_symmetry_3
  _geom_torsion_site_symmetry_4
  _geom_torsion_publ_flag
 Cl01 C005 C007 Cl03 -64.2(2) . . . . ?
 Cl01 C005 C007 C009 57.0(3) . . . . ?
 Cl01 C005 C00A C00G -64.5(3) . . . . ?
 Cl03 C007 C009 Cl02 175.91(16) . . . . ?
 Cl03 C007 C009 C008 -66.8(3) . . . . ?
 O004 C008 C009 Cl02 95.9(3) . . . . ?
 O004 C008 C009 C007 -24.3(4) . . . . ?
 C005 C007 C009 Cl02 51.8(3) . . . . ?
 C005 C007 C009 C008 169.0(3) . . . . ?
 C006 C008 C009 Cl02 -83.4(3) . . . . ?
 C006 C008 C009 C007 156.4(3) . . . . ?
 C006 C00B C00F C00E 1.1(6) . . . . ?
 C006 C00C C00D C00E 1.6(6) . . . . ?
 C007 C005 C00A C00G 170.9(3) . . . . ?
 C008 C006 C00B C00F -179.1(3) . . . . ?
 C008 C006 C00C C00D 177.8(3) . . . . ?
 C00A C005 C007 Cl03 59.9(3) . . . . ?
 C00A C005 C007 C009 -178.9(3) . . . . ?
 C00B C006 C008 O004 14.0(5) . . . . ?
 C00B C006 C008 C009 -166.8(3) . . . . ?
 C00B C006 C00C C00D -1.7(5) . . . . ?
 C00C C006 C008 O004 -165.5(4) . . . . ?
 C00C C006 C008 C009 13.7(4) . . . . ?
 C00C C006 C00B C00F 0.3(5) . . . . ?
 C00C C00D C00E C00F -0.1(6) . . . . ?
 C00D C00E C00F C00B -1.2(6) . . . . ?

_shelx_SHELXL_version_number      '2014/7'
loop_
  _refln_index_h
  _refln_index_k
  _refln_index_l
  _refln_F_squared_meas
  _refln_F_squared_sigma
 0 -8 0 19.3 5.39
 0 -8 -1 3.91 3.22
 0 -8 1 2.98 2.16
 0 -8 2 11.12 4.47
 0 -8 -2 11.16 4.44
 0 -8 3 17.08 5.29
 0 -8 4 8.89 3.99
 0 -8 4 14.36 4.9
 0 -8 5 5.46 3.7
 0 -8 5 9.5 4.09
 0 -7 0 -3.05 3.22
 0 -7 1 97.45 10.63
 0 -7 1 115.29 9.57
 0 -7 2 26.19 4.93
 0 -7 2 21.25 5.33
 0 -7 3 83.98 9.16
 0 -7 3 77.98 9.59
 0 -7 -3 70.77 9.34
 0 -7 -4 80.69 10.04
 0 -7 4 68.92 8.69
 0 -7 4 78.87 9.62
 0 -7 5 36.72 6.74
 0 -7 5 35.62 6.7
 0 -7 -5 39.66 7.27
 0 -7 -6 8.39 3.8
 0 -7 6 0.87 2.62
 0 -7 6 5.72 3.61
 0 -7 7 16.83 5.39
 0 -7 7 13.27 4.57
 0 -6 0 178.56 12.79
 0 -6 0 162.03 9.87
 0 -6 -1 82.61 6.4
 0 -6 -1 84.71 8.98
 0 -6 1 75.55 8.51
 0 -6 1 84.99 7.64
 0 -6 -2 102.83 9.95
 0 -6 2 91.88 9.41
 0 -6 -2 109.66 7.1
 0 -6 2 104.85 8.98
 0 -6 -3 206.96 11.04
 0 -6 3 207.52 13.38
 0 -6 -3 217.69 14.76
 0 -6 3 211.73 14.3
 0 -6 -4 22.77 4.18
 0 -6 -4 30.88 5.8
 0 -6 4 24.05 5.03
 0 -6 4 22.53 5.06
 0 -6 -5 87.17 9.69
 0 -6 -5 77.95 7.73
 0 -6 5 66.92 8.2
 0 -6 5 63.65 8.36
 0 -6 -6 55.82 7.01
 0 -6 6 49.83 7.63
 0 -6 6 46.51 6.98
 0 -6 -6 67.59 8.84
 0 -6 7 16.72 5.09
 0 -6 -7 16.73 4.2
 0 -6 7 14.15 4.4
 0 -6 8 50.44 7.26
 0 -6 -8 44.13 7.01
 0 -6 8 57.84 9.13
 0 -6 9 21.81 5.06
 0 -6 -9 28.15 6.09
 0 -5 0 0.09 0.6
 0 -5 0 1.55 2.13
 0 -5 0 -0.18 1.15
 0 -5 0 0.26 0.6
 0 -5 0 1.24 0.7
 0 -5 1 93.54 4.41
 0 -5 -1 95.12 8.37
 0 -5 1 73.06 3.1
 0 -5 1 99.61 5.53
 0 -5 1 94.77 3.65
 0 -5 1 90.46 3.67
 0 -5 1 94.52 7.28
 0 -5 1 95.92 8.39
 0 -5 -1 98.18 5.76
 0 -5 -1 88.94 5.53
 0 -5 -1 96.81 6.2
 0 -5 -2 162.84 8.46
 0 -5 -2 152.66 7.06
 0 -5 -2 153.87 10.97
 0 -5 2 168.21 11.3
 0 -5 2 164.3 10.35
 0 -5 -3 288.63 8.38
 0 -5 -3 302.52 13.02
 0 -5 -3 293.22 15.75
 0 -5 3 299.37 15
 0 -5 3 310.74 15.69
 0 -5 4 112.18 9.41
 0 -5 -4 99.71 7.87
 0 -5 4 92.97 8.78
 0 -5 5 65.29 7.34
 0 -5 5 67.57 7.86
 0 -5 -5 67.63 6.92
 0 -5 6 1.02 1.9
 0 -5 -6 0.55 1.84
 0 -5 -7 14.98 4.12
 0 -5 7 17.94 4.06
 0 -5 7 16.58 4.49
 0 -5 -8 66.74 8.16
 0 -5 8 51.33 7.98
 0 -5 8 69.86 7.93
 0 -5 -9 8.18 3.61
 0 -5 9 13.52 4.87
 0 -5 9 5.75 3
 0 -5 10 41 7.93
 0 -5 10 23.18 5.22
 0 -5 -10 29.07 6.21
 0 -4 0 1561.99 31.87
 0 -4 0 1416.66 24
 0 -4 0 1461.74 30.35
 0 -4 0 1481.12 27.26
 0 -4 0 1596.54 35.91
 0 -4 0 1563.74 27.48
 0 -4 1 105.68 7
 0 -4 1 113.88 8.04
 0 -4 -1 111.91 5.83
 0 -4 1 105.3 4
 0 -4 -1 93.26 5.36
 0 -4 -1 109.43 5.87
 0 -4 -1 97.52 5.54
 0 -4 1 110.17 4.04
 0 -4 1 106.77 3.71
 0 -4 1 104.09 4.79
 0 -4 -1 103.1 7.73
 0 -4 1 100.91 5.05
 0 -4 -2 337.13 14.63
 0 -4 2 315.02 14
 0 -4 -2 307.26 9.24
 0 -4 2 310.11 13.34
 0 -4 -2 322.33 11.63
 0 -4 -2 309.28 9.24
 0 -4 2 302.8 10.57
 0 -4 -3 413.57 14.5
 0 -4 3 380.9 15.9
 0 -4 -3 373.61 8.56
 0 -4 3 387.69 15.92
 0 -4 4 32.69 4.89
 0 -4 -4 29.49 4.09
 0 -4 4 34.8 4.71
 0 -4 5 52.98 5.98
 0 -4 5 45.78 6.14
 0 -4 -5 45.88 5.45
 0 -4 -6 3.38 2
 0 -4 6 6.01 2.49
 0 -4 6 2.82 2.13
 0 -4 7 44.56 5.61
 0 -4 -7 50.16 6.41
 0 -4 7 35.63 5.95
 0 -4 8 40.35 6.6
 0 -4 -8 39.22 6.2
 0 -4 8 45.39 5.88
 0 -4 9 4.16 2.75
 0 -4 9 4.51 2.47
 0 -4 -9 8.47 3.55
 0 -4 -10 35.41 6.41
 0 -4 10 55.59 8.68
 0 -4 10 44.27 6.48
 0 -4 11 0.23 2.89
 0 -4 -11 0.81 2.15
 0 -3 0 0.03 0.21
 0 -3 0 0.4 0.41
 0 -3 0 0.35 0.45
 0 -3 0 0.25 0.61
 0 -3 0 -1.3 1.08
 0 -3 0 -0.13 0.46
 0 -3 0 0.52 0.68
 0 -3 0 0.7 0.58
 0 -3 1 228.31 7.25
 0 -3 -1 225.58 9.04
 0 -3 1 216.9 6.57
 0 -3 -1 238.06 7.58
 0 -3 -1 229.8 7.93
 0 -3 -1 193.45 7.58
 0 -3 1 250.84 9.84
 0 -3 1 225.33 5.71
 0 -3 1 219.42 5.71
 0 -3 1 210.07 5.27
 0 -3 -1 220.37 7.38
 0 -3 -1 238.25 10.29
 0 -3 1 225.05 9.89
 0 -3 1 229.03 8.77
 0 -3 1 221.71 9.18
 0 -3 1 219.47 9.12
 0 -3 2 136.04 6.5
 0 -3 2 143 7.92
 0 -3 2 131.59 7.51
 0 -3 2 141.9 6.69
 0 -3 2 130.22 3.75
 0 -3 -2 128.99 4.54
 0 -3 -2 133.43 4.64
 0 -3 -2 131.66 6.65
 0 -3 3 240.36 10.74
 0 -3 3 229.43 10.94
 0 -3 3 224.42 8.96
 0 -3 -3 233.46 10.01
 0 -3 3 216.93 9.55
 0 -3 4 283.34 13.11
 0 -3 4 273.58 7.52
 0 -3 -4 290.05 12.25
 0 -3 4 293.44 12.26
 0 -3 5 535.39 13.64
 0 -3 5 513.54 19.63
 0 -3 6 67.81 7.16
 0 -3 -6 70.96 6.94
 0 -3 6 81.95 6.78
 0 -3 6 60.79 4.48
 0 -3 7 479.19 20.84
 0 -3 7 524.18 18.82
 0 -3 -7 515.22 20.48
 0 -3 -8 47.01 6.53
 0 -3 8 62.48 7.66
 0 -3 8 62.27 6.48
 0 -3 9 31.26 4.9
 0 -3 9 24.7 5.48
 0 -3 -9 35.28 5.94
 0 -3 10 15.53 4.38
 0 -3 -10 12.94 4.01
 0 -3 -11 5.68 3.04
 0 -3 11 5.76 3.77
 0 -3 -12 2 3.23
 0 -3 12 1.56 3.13
 0 -2 0 5308.65 84.65
 0 -2 0 5661.64 87.81
 0 -2 0 5641.44 86.64
 0 -2 0 5440.71 87.02
 0 -2 0 5570.2 82.53
 0 -2 0 5562.23 85.85
 0 -2 0 5430.31 84.2
 0 -2 0 5521.94 84.76
 0 -2 0 5533.13 87.74
 0 -2 0 5504.88 82.59
 0 -2 -1 178.83 7.31
 0 -2 1 202.06 7.89
 0 -2 1 189.8 6.6
 0 -2 1 192.17 4.49
 0 -2 -1 188.81 7.2
 0 -2 -1 194.23 7.74
 0 -2 -1 200.25 7.81
 0 -2 1 178.35 4.6
 0 -2 1 191.03 7.25
 0 -2 -1 184.34 5.32
 0 -2 1 193.49 7.36
 0 -2 -1 195.94 5.43
 0 -2 1 190.63 7.68
 0 -2 1 186 6.06
 0 -2 1 187.35 4.5
 0 -2 -1 195.38 6.53
 0 -2 1 178.7 7.34
 0 -2 -2 1864.32 34.03
 0 -2 2 1873.11 34.68
 0 -2 -2 1857.19 34.94
 0 -2 2 1839.63 34.8
 0 -2 2 1817.19 29.21
 0 -2 2 1869.43 34.61
 0 -2 2 1838.21 35.39
 0 -2 -2 1813 33.89
 0 -2 -2 1875.8 34.5
 0 -2 -2 1869.81 35.42
 0 -2 -2 1850.66 34.48
 0 -2 2 1857.35 35.45
 0 -2 2 1826.31 28.33
 0 -2 3 617.34 16.27
 0 -2 -3 589.21 16.39
 0 -2 -3 592.97 15.35
 0 -2 3 625.94 15.65
 0 -2 3 616.36 12.48
 0 -2 3 615.48 17.51
 0 -2 -3 609.93 15.33
 0 -2 -3 599.97 15.39
 0 -2 3 595.5 15.41
 0 -2 4 211.46 8.98
 0 -2 4 204.36 7.27
 0 -2 4 208.52 10.14
 0 -2 -4 218.87 8.09
 0 -2 4 221.57 8.36
 0 -2 -4 205.26 9.55
 0 -2 4 213.48 8.17
 0 -2 -4 211.8 8.17
 0 -2 5 287.25 10.01
 0 -2 -5 275.98 9.24
 0 -2 -5 276.05 9.55
 0 -2 5 285.01 9.65
 0 -2 5 291.12 9.83
 0 -2 -5 312.95 12.89
 0 -2 5 278.38 12.79
 0 -2 -5 284.76 7.14
 0 -2 5 308.2 11.63
 0 -2 -5 289.33 6.93
 0 -2 6 94.29 6.57
 0 -2 -6 93.05 7.42
 0 -2 6 92.39 7.58
 0 -2 6 88.18 5.07
 0 -2 -6 90.92 4.04
 0 -2 6 72.02 4.52
 0 -2 -6 93.97 4.26
 0 -2 -6 83.44 4.86
 0 -2 -6 85.16 4.68
 0 -2 -7 52.45 3.71
 0 -2 -7 60.93 3.77
 0 -2 -7 62.03 6.57
 0 -2 7 55.86 5.52
 0 -2 7 52.53 3.68
 0 -2 7 57.59 6.57
 0 -2 -7 58.2 3.8
 0 -2 8 119.71 9.72
 0 -2 -8 121.22 9.7
 0 -2 8 107.18 8.15
 0 -2 -8 110.16 5.65
 0 -2 9 12.05 3.64
 0 -2 -9 9.45 1.85
 0 -2 -9 15.81 4
 0 -2 -10 55.68 7.46
 0 -2 10 55.45 7.38
 0 -2 11 7.2 3.21
 0 -2 -11 5.44 3.44
 0 -2 12 24.27 5.17
 0 -2 12 23.88 5.73
 0 -2 -12 23.64 5.43
 0 -2 13 26.08 6.17
 0 -1 -1 3240.87 52.07
 0 -1 1 3255.81 52.63
 0 -1 -1 3369 52.54
 0 -1 -1 3357.74 52.71
 0 -1 1 3410.87 52.44
 0 -1 1 3399.42 52.3
 0 -1 -1 3226.89 51.8
 0 -1 1 3373.98 52.8
 0 -1 -1 3364.29 51.99
 0 -1 1 3528.09 52.49
 0 -1 -1 3259.58 52.16
 0 -1 2 506.66 10.15
 0 -1 -2 524.31 12.64
 0 -1 -2 496.57 10.86
 0 -1 -2 508.63 12.34
 0 -1 2 504.35 12.6
 0 -1 2 514.16 11.02
 0 -1 2 520.86 12.73
 0 -1 -2 501.25 11.13
 0 -1 2 504.27 10.9
 0 -1 -2 501.98 10.87
 0 -1 -2 488.32 12.19
 0 -1 2 510.62 11.7
 0 -1 -3 1352.17 22.18
 0 -1 -3 1315.37 26.71
 0 -1 3 1329.35 24.3
 0 -1 -3 1251.44 22.81
 0 -1 3 1367.95 23.15
 0 -1 3 1391.65 27.22
 0 -1 -3 1316.5 21.95
 0 -1 3 1338.75 23.07
 0 -1 3 1312.94 26.86
 0 -1 -3 1261.37 23.86
 0 -1 3 1325.28 25.09
 0 -1 -3 1290.24 22.76
 0 -1 -4 407.31 9.29
 0 -1 4 407.09 11.78
 0 -1 -4 414.3 9.09
 0 -1 4 394.86 9.13
 0 -1 -4 411.5 13.2
 0 -1 4 400.84 13.11
 0 -1 4 403.13 11.91
 0 -1 -4 398.68 10.47
 0 -1 -4 406.83 9.92
 0 -1 4 402.59 13.12
 0 -1 4 398.63 9.25
 0 -1 -4 408.51 9.81
 0 -1 -5 2392.46 41.3
 0 -1 -5 2374.05 38.45
 0 -1 5 2419.98 38.52
 0 -1 -5 2529.87 47.56
 0 -1 5 2498.45 44.99
 0 -1 5 2400 44.89
 0 -1 5 2456.41 47.05
 0 -1 -5 2390.41 41.49
 0 -1 -5 2489.2 41.91
 0 -1 -6 369.07 10.82
 0 -1 6 363.57 14.23
 0 -1 -6 338.92 7.42
 0 -1 6 330.83 7.29
 0 -1 -6 365.01 11.13
 0 -1 -6 362.96 14.36
 0 -1 -6 372.6 11.33
 0 -1 -7 584.61 20.03
 0 -1 -7 565.28 15.78
 0 -1 7 546.93 19.36
 0 -1 -8 82.04 5.79
 0 -1 8 71.2 4.49
 0 -1 -8 66.72 6.96
 0 -1 8 82.73 7.48
 0 -1 -9 -2.03 2
 0 -1 9 1.6 1.05
 0 -1 9 0.22 2.01
 0 -1 -9 0.35 1.22
 0 -1 -10 -0.92 2.11
 0 -1 10 3.65 2.31
 0 -1 10 -0.9 2.45
 0 -1 -10 0.7 1.25
 0 -1 11 54 6.98
 0 -1 11 55.9 7.43
 0 -1 -11 46.65 7.08
 0 -1 12 6.03 3.16
 0 -1 12 2.1 2.53
 0 -1 -12 -3.08 2.56
 0 -1 13 20.19 5.09
 0 -1 13 13.62 4.22
 0 -1 -13 16.4 4.96
 0 -1 14 -1.21 2.74
 0 -1 14 0.01 3.11
 0 0 2 7577.29 113.53
 0 0 -3 670.42 15.02
 0 0 3 689.08 14.85
 0 0 3 686.88 15.76
 0 0 3 681.84 14.78
 0 0 -3 675.44 15.45
 0 0 -3 645.89 14.58
 0 0 3 674.85 12.51
 0 0 -3 644.66 14.44
 0 0 -4 556.34 15.11
 0 0 -4 565.55 14.61
 0 0 4 570.81 14.4
 0 0 4 551.49 15.43
 0 0 -4 552.14 14.25
 0 0 -4 569.93 14.23
 0 0 4 559.46 11.69
 0 0 4 562 14.29
 0 0 5 6.52 1.59
 0 0 -5 8.2 1.74
 0 0 5 8.08 1.74
 0 0 -5 6.8 1.86
 0 0 -5 4.51 1.3
 0 0 5 5.09 1.1
 0 0 -6 198.92 9.7
 0 0 -6 189.04 8.67
 0 0 6 169.64 8.48
 0 0 6 184.14 6.61
 0 0 7 7.33 2.22
 0 0 7 7.57 1.53
 0 0 -7 5 1.78
 0 0 -7 7.95 2.5
 0 0 -8 2.41 1.59
 0 0 -8 1.98 1.92
 0 0 8 0.81 0.92
 0 0 8 0.3 1.58
 0 0 9 22.73 4.28
 0 0 -9 17.24 3.45
 0 0 9 19.76 2.57
 0 0 -9 13.02 3.41
 0 0 9 23.96 3.97
 0 0 10 36.92 5.64
 0 0 -10 33.74 4.76
 0 0 -10 30.89 5.17
 0 0 10 29.54 4.82
 0 0 11 80.65 8.08
 0 0 -11 71.01 7.18
 0 0 11 90.44 9.32
 0 0 11 79.54 8.77
 0 0 -11 83.45 8.85
 0 0 -12 2.26 2.11
 0 0 -12 4.87 3.29
 0 0 12 1.2 2.81
 0 0 12 0.26 1.78
 0 0 12 -2.02 2.16
 0 0 13 15.47 5.32
 0 0 13 16.37 5.06
 0 0 -13 22.68 5.32
 0 0 14 1.24 2.65
 0 0 14 -1.1 2.72
 0 1 -1 3480.23 53.76
 0 1 -1 3355.43 53.87
 0 1 1 3421.06 54.1
 0 1 -1 3469.04 53.99
 0 1 -1 3494.39 54.09
 0 1 1 3498.63 54
 0 1 1 3502.91 53.73
 0 1 1 3356.36 53.51
 0 1 -2 525.29 9.59
 0 1 2 520.31 12.79
 0 1 -2 500.79 11.94
 0 1 -2 525.42 11.19
 0 1 2 508.37 12.57
 0 1 -2 524.89 10.21
 0 1 2 530.17 11.4
 0 1 2 553.19 12.8
 0 1 -2 526.52 12.65
 0 1 -2 495.5 12.54
 0 1 2 510.68 11.05
 0 1 -2 526.78 10.6
 0 1 3 1391.83 27.17
 0 1 3 1340.17 26.78
 0 1 -3 1332.36 24.16
 0 1 -3 1330.73 24.56
 0 1 -3 1390.55 23.88
 0 1 -3 1331.29 26.97
 0 1 3 1355.81 27.48
 0 1 -3 1357.49 25.75
 0 1 -3 1310.1 26.66
 0 1 -3 1377.8 23.49
 0 1 3 1332.16 22.3
 0 1 3 1341.86 24.35
 0 1 3 1306.38 23.21
 0 1 4 423.6 10.82
 0 1 -4 413.22 12.93
 0 1 4 426.9 13.36
 0 1 -4 411.67 11.26
 0 1 -4 437.32 12.44
 0 1 4 422.84 10.16
 0 1 -4 421.77 11.5
 0 1 4 399.99 9.28
 0 1 -4 409.68 13.04
 0 1 4 429.7 13.34
 0 1 -4 416.04 11.77
 0 1 -4 399.77 9.42
 0 1 5 2435.88 38.95
 0 1 -5 2474.2 44.52
 0 1 5 2514.71 47.32
 0 1 5 2555.84 47.64
 0 1 -5 2429.06 44.39
 0 1 -5 2542.9 46.88
 0 1 -5 2476.16 39.33
 0 1 5 2512.6 42.36
 0 1 6 361.69 11.42
 0 1 -6 371 12.93
 0 1 6 371.7 14.45
 0 1 6 355.39 14.13
 0 1 -6 380.04 14.02
 0 1 6 369.94 11.04
 0 1 7 575.86 19.76
 0 1 7 535.09 15.93
 0 1 7 615.71 15.56
 0 1 7 571.26 19.72
 0 1 -7 587.19 19.1
 0 1 -7 522.91 17.58
 0 1 8 81.35 5.25
 0 1 -8 78.67 6.95
 0 1 8 82.42 7.59
 0 1 8 79.69 7.51
 0 1 -8 71.68 6.44
 0 1 8 66.97 5.46
 0 1 9 0.12 1.05
 0 1 -9 -0.2 1.91
 0 1 9 -1.43 1.28
 0 1 9 0.1 1.63
 0 1 -9 -0.77 2.13
 0 1 9 1.34 2.2
 0 1 -10 2.6 1.99
 0 1 10 -0.38 1.72
 0 1 10 0.78 1.33
 0 1 10 3.62 2.73
 0 1 -10 0.47 1.94
 0 1 -11 48.53 6.31
 0 1 -11 52.34 6.95
 0 1 11 42.46 6.73
 0 1 11 45.68 6.83
 0 1 12 3.13 1.8
 0 1 -12 2.07 2.25
 0 1 -12 -1.2 2.16
 0 1 12 -2 2.53
 0 1 13 12.76 4.49
 0 1 13 20.11 5.51
 0 1 -13 15.64 4.2
 0 1 -13 14.56 4.55
 0 1 -14 3.42 3.29
 0 2 0 5416.12 87.95
 0 2 0 5685.81 86.12
 0 2 0 5640.85 84.97
 0 2 0 5369.34 86.8
 0 2 0 5534.76 84.68
 0 2 -1 199.72 7.29
 0 2 1 191.63 6.65
 0 2 -1 201.76 7.65
 0 2 1 189.6 5.11
 0 2 -1 194.54 7.11
 0 2 1 185.9 7.63
 0 2 1 192.61 7.36
 0 2 1 194.11 7.57
 0 2 -1 191.22 7.74
 0 2 -1 185.33 4.44
 0 2 -2 1879.38 35.34
 0 2 2 1869.3 34.82
 0 2 -2 1813.38 29.89
 0 2 -2 1870.78 34.93
 0 2 2 1860.95 29.5
 0 2 -2 1915.6 35.51
 0 2 -2 1909.1 29.99
 0 2 2 1846.63 34.8
 0 2 2 1909.43 35.66
 0 2 -2 1973.18 35.34
 0 2 2 1812.79 35.49
 0 2 -3 620.27 12.24
 0 2 -3 587.38 15.4
 0 2 3 593.63 15.38
 0 2 -3 603.85 16.84
 0 2 3 591.21 16.72
 0 2 3 613.36 17.07
 0 2 3 639.32 17.18
 0 2 -3 598.72 12.87
 0 2 -3 618.7 16.33
 0 2 -4 199.03 6.82
 0 2 -4 209.12 7.38
 0 2 4 193.05 7.87
 0 2 -4 218.44 9.89
 0 2 4 225.27 10.12
 0 2 -4 209.14 5.91
 0 2 4 220.39 10.03
 0 2 -4 199.11 7.96
 0 2 5 270.66 12.2
 0 2 5 283.84 12.46
 0 2 -5 288.82 9.52
 0 2 -5 284.44 8.63
 0 2 -5 307.04 12.69
 0 2 -5 269.43 9.51
 0 2 5 270.62 9.5
 0 2 -5 282.14 9.9
 0 2 6 90.27 4.02
 0 2 -6 95.61 5.79
 0 2 6 101.81 7.77
 0 2 -6 87.25 5.02
 0 2 6 84.25 7.09
 0 2 6 91.38 5.84
 0 2 6 77.5 4.72
 0 2 -6 91.05 7.18
 0 2 -6 81.85 5.01
 0 2 -7 57.95 3.99
 0 2 -7 55.83 4.64
 0 2 7 55.62 6.22
 0 2 7 62.76 3.99
 0 2 7 56.25 3.67
 0 2 -7 50.73 5.75
 0 2 7 66.79 6.71
 0 2 7 57.97 4.86
 0 2 -7 66.02 5.29
 0 2 8 113.27 5.86
 0 2 8 125.77 9.97
 0 2 -8 121.31 9.29
 0 2 -8 100.21 7.22
 0 2 8 94.11 8.56
 0 2 9 14.49 3.77
 0 2 9 7.33 1.8
 0 2 -9 6.27 2.74
 0 2 9 10.17 3.57
 0 2 -9 12.32 2.93
 0 2 -10 59.17 6.41
 0 2 10 54.28 7.46
 0 2 -10 65.48 7.53
 0 2 10 67.98 8.22
 0 2 -11 4.57 2.7
 0 2 -11 3.62 2.25
 0 2 11 6.79 3.41
 0 2 -12 28.97 5.66
 0 2 12 30.47 6.23
 0 2 -12 24.29 4.89
 0 2 12 28.77 6.3
 0 2 13 21.38 5.58
 0 2 13 20.54 5.93
 0 2 -13 24.33 5.44
 0 3 0 -1.47 0.8
 0 3 0 -0.41 0.99
 0 3 0 0.56 0.75
 0 3 1 217.45 9.2
 0 3 -1 222.16 8.78
 0 3 1 213.91 9.95
 0 3 -1 206.46 9.84
 0 3 1 219.51 6.91
 0 3 -1 234.01 9.12
 0 3 -1 215.51 8.58
 0 3 1 214.07 9.54
 0 3 2 139.21 4.37
 0 3 -2 128.18 3.89
 0 3 2 139 7.05
 0 3 2 143.24 7.81
 0 3 -2 136.53 7.33
 0 3 2 144.71 7.98
 0 3 -2 139.72 7.94
 0 3 2 136.03 7.82
 0 3 -3 237.52 10.51
 0 3 3 238.2 6.25
 0 3 3 237.37 10.62
 0 3 -3 221.56 6.35
 0 3 -3 238.32 6.52
 0 3 3 240.55 10.99
 0 3 -3 232.01 10.55
 0 3 3 220.14 10.65
 0 3 -4 290.69 11.83
 0 3 4 285.63 12.88
 0 3 -4 285.67 8.49
 0 3 4 298.75 12.98
 0 3 4 283.98 11.75
 0 3 -4 282.89 12.54
 0 3 -4 284.45 8.53
 0 3 5 602.59 20.4
 0 3 -5 576.49 14.68
 0 3 5 595.5 20.32
 0 3 5 554.75 17.37
 0 3 -5 560.4 19.47
 0 3 -5 561.86 13.49
 0 3 -5 568.24 17.57
 0 3 -6 67.8 4.52
 0 3 6 67.95 7.04
 0 3 6 74.99 7.17
 0 3 -6 61.32 5.25
 0 3 6 65.94 5.47
 0 3 -6 65.63 6.71
 0 3 -7 486.03 15.94
 0 3 7 473.26 15.6
 0 3 -7 489.48 19.74
 0 3 -7 482.74 14.8
 0 3 7 495.46 20.33
 0 3 7 496.79 20.38
 0 3 8 60.89 7.32
 0 3 8 49.89 6.68
 0 3 8 59.86 4.99
 0 3 -8 49.35 6.45
 0 3 -8 56.23 5.12
 0 3 -8 47.53 4.62
 0 3 -9 31.86 5.6
 0 3 -9 26.22 3.94
 0 3 9 24.47 5.23
 0 3 10 16.51 4.74
 0 3 10 15.93 4.65
 0 3 -10 10.67 3.72
 0 3 11 9.09 3.85
 0 3 11 8.28 3.72
 0 3 -11 13.81 3.86
 0 3 -12 4.63 3.32
 0 3 12 0.76 2.35
 0 3 12 2.95 3.09
 0 4 0 1513.71 36.6
 0 4 0 1498.18 33.2
 0 4 0 1533.83 30.8
 0 4 1 110.47 5.43
 0 4 1 118.15 7.99
 0 4 -1 104.48 6.52
 0 4 1 106.87 8.11
 0 4 -1 109.95 8.18
 0 4 1 108.01 7.27
 0 4 -1 89.89 6.35
 0 4 -2 351.16 13.39
 0 4 2 308.46 13.75
 0 4 -2 344.2 14.94
 0 4 2 301.61 14.01
 0 4 2 332.16 13.79
 0 4 2 333.76 9.04
 0 4 3 385.29 15.77
 0 4 3 388.71 15.93
 0 4 -3 352.47 7.59
 0 4 -3 396.37 15.12
 0 4 -3 385.32 15.83
 0 4 3 380.41 15.58
 0 4 -4 30.83 4.47
 0 4 -4 33.68 2.25
 0 4 4 37.08 5.06
 0 4 -4 30.89 2.15
 0 4 -4 29.61 4.42
 0 4 4 33.46 4.81
 0 4 4 30.89 2.07
 0 4 4 27.08 2.04
 0 4 4 25.4 4.09
 0 4 5 52.46 5.74
 0 4 -5 56.69 5.91
 0 4 5 61.28 6.73
 0 4 5 48.37 6.02
 0 4 -5 53.9 3.51
 0 4 -5 54.02 6.11
 0 4 5 44.8 3.43
 0 4 5 61.09 3.71
 0 4 6 5.07 1.38
 0 4 6 2.92 2.08
 0 4 -6 8.65 2.94
 0 4 -6 3.33 1.79
 0 4 6 5.19 2.19
 0 4 -6 4.53 1.35
 0 4 6 4.52 2.42
 0 4 7 46.75 6.56
 0 4 7 31.25 4.54
 0 4 -7 36.62 5.6
 0 4 -7 42.86 4.08
 0 4 7 36.12 3.87
 0 4 7 48.28 6.63
 0 4 -7 45.31 5.29
 0 4 -8 41.44 5.1
 0 4 8 41.54 5.06
 0 4 8 39.92 4.49
 0 4 -8 34.61 5.75
 0 4 8 44.11 6.68
 0 4 8 53.38 7.44
 0 4 -9 4.76 2.58
 0 4 9 9.71 3.76
 0 4 9 5.33 3.28
 0 4 10 37.76 6.97
 0 4 10 38.63 7.06
 0 4 -10 42.04 6.94
 0 4 11 0.58 2.36
 0 4 11 2.84 2.85
 0 4 -11 -0.9 2.27
 0 5 0 2.05 1.36
 0 5 0 -0.62 1.75
 0 5 0 -0.63 2.1
 0 5 -1 95.94 6.83
 0 5 1 102.25 7.91
 0 5 1 93.23 8.7
 0 5 -1 105.57 9.12
 0 5 1 101.46 5.89
 0 5 2 163.73 11.46
 0 5 2 174.61 6.93
 0 5 2 139.52 9.7
 0 5 -2 136.51 8.83
 0 5 2 146.31 10.36
 0 5 -2 149.41 10.93
 0 5 3 289.9 14.76
 0 5 -3 306.65 15.87
 0 5 3 280.93 15.39
 0 5 -3 307.06 14.23
 0 5 3 309.25 15.76
 0 5 4 99.05 8.88
 0 5 -4 78.67 7.62
 0 5 4 94.77 8.76
 0 5 -4 98.06 8.79
 0 5 4 92.42 8.74
 0 5 -5 57.17 6.75
 0 5 5 66 7.56
 0 5 5 58.59 6.95
 0 5 -5 58.26 6.83
 0 5 5 66.38 7.67
 0 5 -6 -2.07 2.08
 0 5 6 -3.03 2.57
 0 5 -6 -3.88 2.52
 0 5 6 -0.06 2.01
 0 5 6 1.13 1.75
 0 5 7 8.85 3.44
 0 5 -7 13.87 4.13
 0 5 7 19.22 4.67
 0 5 7 13.25 3.6
 0 5 -7 13.06 3.72
 0 5 -8 50.09 6.48
 0 5 -8 47.45 7.01
 0 5 8 54.91 8.04
 0 5 8 66.83 8.74
 0 5 9 10.29 4.2
 0 5 9 8.29 3.73
 0 5 -9 5.9 2.96
 0 5 -10 29.47 6.37
 0 5 10 23.4 5.95
 0 5 10 29.89 6.61
 0 6 0 170.72 9.33
 0 6 0 187.79 13.71
 0 6 0 184.51 11.63
 0 6 -1 102.6 7.62
 0 6 1 89.88 9.48
 0 6 1 88.63 6.11
 0 6 1 93.22 8.42
 0 6 -1 82.93 9.35
 0 6 2 92.75 9.71
 0 6 -2 104.33 10.19
 0 6 2 98.78 8.95
 0 6 -2 98.74 8.02
 0 6 3 211.67 14.59
 0 6 3 217.74 13.7
 0 6 3 195.69 13.61
 0 6 -3 203 14.18
 0 6 -3 199.62 12.11
 0 6 4 25 5.39
 0 6 4 25.86 5.2
 0 6 -4 18.92 4.66
 0 6 -4 26.74 4.88
 0 6 4 29.35 5.5
 0 6 5 72.23 8.69
 0 6 5 67.08 8.34
 0 6 -5 70.82 8.48
 0 6 -5 68.56 7.9
 0 6 5 82.14 9.3
 0 6 6 67.33 8.65
 0 6 6 48.67 7.21
 0 6 6 45.06 7.11
 0 6 -6 38.51 6.35
 0 6 -6 41.81 6.62
 0 6 7 15.17 4.55
 0 6 7 25.59 5.72
 0 6 7 20.52 5.55
 0 6 -7 19.41 4.82
 0 6 -7 19.58 4.65
 0 6 8 49.51 8.08
 0 6 -8 49.95 7.71
 0 6 8 70.81 9.68
 0 6 -8 48.35 7.25
 0 7 0 0.04 2.66
 0 7 -1 115.42 11.94
 0 7 1 101.66 11.21
 0 7 1 118.17 10.35
 0 7 -2 37.32 6.79
 0 7 2 35.73 6.06
 0 7 2 25.16 5.98
 0 7 -2 24.19 4.57
 0 7 -3 84.68 8.34
 0 7 3 93.28 9.78
 0 7 -3 85.94 10.27
 0 7 3 90.37 10.6
 0 7 4 70.19 8.84
 0 7 4 73.04 9.67
 0 7 4 72.62 9.23
 0 7 -4 82.87 10.08
 0 7 -4 58.64 7.35
 0 7 5 44.21 7.35
 0 7 5 34.78 6.86
 0 7 -5 44.39 6.75
 0 7 5 35.95 6.99
 0 7 -5 36.99 6.82
 0 7 6 2.42 3.32
 0 7 -6 -0.69 2.12
 0 7 6 3.37 3.22
 0 7 -6 5.29 3.09
 0 7 6 1.83 2.66
 0 7 -7 26.14 5.78
 0 7 -7 22.93 5.76
 0 7 7 18.8 5.27
 0 7 7 21.5 5.44
 0 8 0 18.31 5.91
 0 8 1 4.25 2.95
 0 8 2 14.61 4.26
 0 8 3 20.99 5.37
 0 8 4 8.19 3.52
 0 8 -5 5.87 3.41
 -1 -8 5 9.66 3.64
 -1 -8 5 10.42 4.22
 -1 -8 4 14.5 4.66
 -1 -8 4 20.53 5.23
 -1 -8 3 9.78 4.49
 1 -8 -2 24.67 6.78
 -1 -8 2 26.2 6.21
 1 -8 -1 52.09 8.87
 -1 -8 1 45.89 8.07
 1 -8 0 23.08 6.21
 -1 -8 0 17.43 5.3
 1 -8 1 22.18 6.09
 -1 -8 -1 19.42 5.2
 1 -8 2 12.78 4.97
 -1 -8 -2 7.74 3.83
 1 -8 3 4.49 3.1
 1 -8 4 1.47 2.05
 -1 -7 7 4.43 3.2
 -1 -7 6 3.88 3.05
 -1 -7 6 9.67 3.71
 -1 -7 5 4.2 2.81
 1 -7 -5 15.26 4.65
 -1 -7 5 11.36 3.97
 1 -7 -4 15.38 4.33
 -1 -7 4 8.49 3.54
 -1 -7 4 10.77 4.05
 -1 -7 3 22 5.17
 -1 -7 3 15.98 4.35
 1 -7 -3 19.11 5.26
 1 -7 -2 107.03 11.31
 -1 -7 2 121.41 10.25
 -1 -7 2 113.28 11.22
 1 -7 -1 11.22 4.17
 -1 -7 1 18.08 5.03
 -1 -7 0 46.58 7.31
 1 -7 0 47.09 7.82
 -1 -7 -1 43 7.07
 1 -7 1 25.32 5.81
 1 -7 1 32.02 5.27
 1 -7 2 32.66 6.49
 1 -7 2 24.18 4.93
 -1 -7 -2 29.72 6.01
 1 -7 3 47.57 7.99
 1 -7 3 43.29 6.73
 -1 -7 -3 49.97 7.85
 1 -7 4 79.75 9.66
 -1 -7 -4 75.72 9.82
 1 -7 4 81.3 10.08
 1 -7 5 61.17 9.03
 -1 -7 -5 46.71 8.05
 1 -7 5 45.09 7.72
 -1 -7 -6 27.08 6.54
 1 -7 6 27.77 6.23
 1 -7 6 19.88 5.2
 1 -7 7 35.52 7.01
 -1 -7 -8 -2.41 3.19
 1 -6 -10 12.28 4.64
 1 -6 -9 22.08 5.39
 -1 -6 9 14.99 5.37
 -1 -6 8 31.19 5.57
 1 -6 -8 27.18 5.43
 -1 -6 8 23.47 5.98
 1 -6 -7 73.39 8.14
 -1 -6 7 64.88 7.75
 -1 -6 7 62.51 8.98
 1 -6 -7 62.22 8.67
 -1 -6 6 20.89 4.79
 -1 -6 6 12.24 4.2
 1 -6 -6 11.63 3.23
 1 -6 -6 20.09 5.01
 1 -6 -5 69.59 8.76
 1 -6 -5 59.62 6.46
 -1 -6 5 59.97 7.41
 -1 -6 5 59.47 7.97
 1 -6 -4 18.48 4.6
 -1 -6 4 20.37 4.51
 1 -6 -4 18.98 3.44
 -1 -6 4 15.79 4.33
 -1 -6 3 48.76 6.71
 -1 -6 3 54.07 6.95
 1 -6 -3 53.78 7.3
 1 -6 -3 45.59 4.82
 -1 -6 2 39.73 5.65
 1 -6 -2 43 6.75
 -1 -6 2 38.28 6
 1 -6 -1 83.11 6.55
 -1 -6 1 99.06 8.21
 -1 -6 1 102.19 9.52
 1 -6 -1 100.21 9.9
 1 -6 0 105.07 8.02
 -1 -6 0 106.38 7.93
 -1 -6 0 117.72 10.2
 1 -6 0 119.03 10.8
 1 -6 1 13.71 4.38
 -1 -6 -1 6.39 2.18
 -1 -6 -1 11.25 3.49
 1 -6 1 15.4 3.56
 -1 -6 -1 14.97 2.83
 1 -6 2 69.19 7.45
 -1 -6 -2 61.9 6.02
 1 -6 2 70.06 8.51
 -1 -6 -2 64.21 7.91
 1 -6 3 138.4 11.95
 -1 -6 -3 131.93 11.59
 -1 -6 -3 143.75 9.77
 1 -6 3 117.53 10.32
 1 -6 4 39.12 6.31
 -1 -6 -4 49.18 6.18
 -1 -6 -4 60.66 8.06
 1 -6 4 45.1 6.99
 1 -6 5 62.17 8.24
 1 -6 5 62.02 8.27
 -1 -6 -5 54.19 6.86
 -1 -6 -6 15.01 3.98
 1 -6 6 15.71 4.95
 1 -6 6 11.27 3.84
 -1 -6 -7 7.51 3.66
 1 -6 7 4.24 2.76
 1 -6 7 1.38 2.91
 -1 -6 -8 10.34 4.21
 1 -6 8 14.56 5.1
 1 -6 8 21.72 5.12
 -1 -6 -9 27.55 6.28
 1 -6 9 20.54 5.25
 1 -5 -11 13.07 4.67
 1 -5 -10 20.28 5.04
 -1 -5 10 18.5 5.57
 1 -5 -9 16.67 4.62
 -1 -5 9 15.32 5.12
 -1 -5 9 24.49 4.64
 -1 -5 8 83.42 8.14
 -1 -5 8 75.51 9.63
 1 -5 -8 67.79 8.07
 -1 -5 7 28.09 5.63
 -1 -5 7 26.34 4.6
 1 -5 -7 20.82 4.63
 -1 -5 6 45.32 6.96
 -1 -5 6 41.15 5.59
 1 -5 -6 38.9 5.41
 1 -5 -5 177.84 10.68
 1 -5 -5 163.7 12.24
 -1 -5 5 176.57 11.41
 -1 -5 5 149.11 11.62
 -1 -5 4 87.94 8.1
 -1 -5 4 94.3 8.72
 1 -5 -4 99.77 7.34
 1 -5 -4 87.09 8.66
 -1 -5 3 124.69 5.06
 -1 -5 3 133.94 9.89
 1 -5 -3 129.86 7.74
 -1 -5 3 128.34 9.54
 1 -5 -3 136.92 10.54
 1 -5 -3 126.78 5.35
 1 -5 -2 288.12 15.36
 1 -5 -2 282.6 10.22
 1 -5 -2 263.27 10.32
 -1 -5 2 276.54 8.07
 -1 -5 2 300.58 14.74
 1 -5 -2 281.21 10.56
 -1 -5 2 285.3 13.85
 -1 -5 2 295.88 9.02
 1 -5 -1 199.13 12.49
 -1 -5 1 188.93 10.36
 1 -5 -1 191.8 9.08
 -1 -5 1 165.62 4.41
 -1 -5 1 186.78 7.64
 -1 -5 1 170.63 7.36
 -1 -5 1 185.7 11.27
 -1 -5 1 175.58 7.16
 1 -5 -1 175.03 7
 -1 -5 1 158.36 4.25
 1 -5 -1 172.98 6.66
 -1 -5 0 147.84 10.24
 -1 -5 0 140.88 7.14
 1 -5 0 143.1 10.47
 1 -5 0 123 6.98
 -1 -5 0 112.77 6.55
 -1 -5 0 138.67 8.21
 -1 -5 0 137.72 7.13
 1 -5 0 131.95 4.56
 1 -5 0 138.93 8.39
 1 -5 0 127.84 5.35
 -1 -5 -1 76.84 7.47
 -1 -5 -1 73.42 5.44
 1 -5 1 76.45 6.71
 -1 -5 -1 71.57 5.63
 1 -5 1 64.71 7.27
 -1 -5 -2 107.98 9.06
 1 -5 2 114.25 9.72
 -1 -5 -2 100.57 5.78
 1 -5 2 93.94 7.92
 -1 -5 -2 101.56 7.28
 1 -5 3 46.05 6.32
 -1 -5 -3 34.18 2.78
 1 -5 3 31.59 4.94
 -1 -5 -3 33.52 4.67
 -1 -5 -4 199.61 11.77
 1 -5 4 167.62 11.98
 1 -5 4 180.57 12.49
 1 -5 5 95.42 9.24
 -1 -5 -5 96.82 8.72
 1 -5 5 101.33 9.68
 1 -5 6 57.14 7.28
 1 -5 6 48.22 7.21
 -1 -5 -6 48.43 6.59
 -1 -5 -7 12.35 4.02
 1 -5 7 24.32 5.8
 1 -5 7 19.14 4.46
 1 -5 8 20 4.66
 -1 -5 -8 21.25 5
 1 -5 8 17.39 5.1
 -1 -5 -9 13.41 4.86
 1 -5 9 14.46 4.43
 1 -5 9 15.76 5.28
 1 -5 10 16.88 4.73
 -1 -5 -10 11.12 4.29
 1 -5 11 4.37 3.04
 1 -4 -11 7.58 3.47
 -1 -4 11 6.09 3.94
 -1 -4 10 19.7 5.13
 1 -4 -10 23.48 5.32
 -1 -4 10 22.72 4.48
 1 -4 -9 9.06 3.65
 -1 -4 9 9.24 2.99
 -1 -4 9 9.88 3.82
 -1 -4 8 34.37 6.12
 -1 -4 8 49.51 5.76
 1 -4 -8 38.34 5.89
 1 -4 -7 87.39 8.12
 -1 -4 7 75.88 8.51
 -1 -4 7 97.36 7.78
 -1 -4 6 19.66 3.68
 -1 -4 6 20.14 4.3
 1 -4 -6 26.48 4.37
 1 -4 -5 253.21 12.24
 -1 -4 5 220.96 7.2
 -1 -4 5 237.13 13.52
 -1 -4 5 248.21 12.2
 -1 -4 4 2.92 0.72
 -1 -4 4 2.44 1.02
 -1 -4 4 2.6 2.21
 1 -4 -4 2.52 1.59
 -1 -4 4 2.55 1.74
 1 -4 -3 195.61 5.75
 1 -4 -3 207.5 11.73
 -1 -4 3 201.35 6.82
 1 -4 -3 211.95 9.44
 -1 -4 3 176.45 8.47
 -1 -4 3 198.22 11.02
 -1 -4 3 192.7 5.83
 -1 -4 3 207.64 10.75
 -1 -4 2 109.92 5.64
 1 -4 -2 129.83 8.99
 -1 -4 2 131.89 5.59
 1 -4 -2 124.04 6.32
 -1 -4 2 123.45 5.06
 -1 -4 2 122.59 8.02
 -1 -4 2 121.17 8.12
 1 -4 -2 131.84 5.78
 -1 -4 2 127.56 5.58
 -1 -4 1 591.25 15.54
 -1 -4 1 601.33 11.94
 1 -4 -1 588.06 20.17
 1 -4 -1 594.28 14.18
 -1 -4 1 621.08 18.33
 -1 -4 1 619.52 14.95
 -1 -4 1 613 19.39
 1 -4 -1 592.07 13.31
 -1 -4 1 583.65 12.38
 1 -4 -1 584.16 12.28
 1 -4 -1 587.42 15.88
 -1 -4 1 584.12 14.75
 -1 -4 1 616.74 14.71
 1 -4 -1 589.91 13.94
 1 -4 0 646.65 12.45
 1 -4 0 764.94 23.14
 1 -4 0 719.55 15.44
 -1 -4 0 744.26 18.97
 1 -4 0 720.11 19.23
 1 -4 0 650.11 12.2
 -1 -4 0 725.97 17.69
 -1 -4 0 700.12 17.49
 1 -4 0 720.51 13.53
 -1 -4 0 742.64 21.88
 -1 -4 0 681.32 18.86
 1 -4 0 672.31 12.46
 1 -4 1 109.59 7.32
 -1 -4 -1 117.65 6.83
 -1 -4 -1 115.7 6.04
 -1 -4 -1 115.37 8.18
 1 -4 1 109.94 5
 -1 -4 -1 93.19 5.46
 1 -4 1 102.05 6.04
 1 -4 1 111.74 8.42
 1 -4 1 106.04 5.72
 1 -4 2 1237.89 32.43
 -1 -4 -2 1150.79 23.5
 1 -4 2 1142.66 25.52
 1 -4 2 1168.65 30.1
 -1 -4 -2 1234.54 23.86
 -1 -4 -2 1263.08 29.13
 1 -4 3 7.39 2.98
 -1 -4 -3 5.24 2.32
 -1 -4 -3 7.48 1.18
 1 -4 3 7.47 1.69
 -1 -4 -3 8.53 1.3
 1 -4 4 238.65 13.25
 -1 -4 -4 235.03 5.35
 1 -4 4 241.85 9.56
 1 -4 4 259.49 13.5
 -1 -4 -4 218.26 5.18
 -1 -4 -4 250.27 12.69
 1 -4 5 26.3 4.66
 -1 -4 -5 30.98 4.73
 1 -4 5 28.34 4.88
 -1 -4 -6 74.35 7.68
 1 -4 6 65.33 7.07
 1 -4 6 51.87 7.02
 -1 -4 -7 4.27 2.67
 1 -4 7 4.54 2.52
 1 -4 7 4.63 2.43
 1 -4 8 11.74 3.52
 1 -4 8 11.07 4.09
 -1 -4 -8 14.56 4
 1 -4 9 4.46 2.82
 -1 -4 -9 6.37 3.58
 1 -4 9 6.37 3.75
 1 -4 10 27.33 6.29
 -1 -4 -10 26.11 5.91
 1 -4 10 28.62 5.7
 -1 -4 -11 4.13 3.47
 1 -4 11 4.88 3.83
 -1 -3 13 2.06 3.16
 -1 -3 12 33.88 7.23
 1 -3 -12 33.35 6.62
 -1 -3 11 27.31 6.13
 1 -3 -11 27.46 5.88
 -1 -3 10 6.95 3.64
 1 -3 -10 9.24 3.68
 1 -3 -9 56.94 7.09
 -1 -3 9 54.65 7.55
 -1 -3 9 57.35 6.13
 -1 -3 8 93.98 7.36
 -1 -3 8 82.63 8.68
 1 -3 -8 72.25 7.68
 -1 -3 7 77.28 6.36
 1 -3 -7 76.61 7.36
 -1 -3 7 74.24 7.74
 -1 -3 6 102.29 6.95
 -1 -3 6 106.11 8.74
 -1 -3 6 88.31 5.55
 1 -3 -6 107.18 8.05
 1 -3 -5 1382.35 32.07
 -1 -3 5 1367.45 34.26
 -1 -3 5 1392.49 30.47
 1 -3 -4 107.25 6.79
 -1 -3 4 99.04 5.01
 -1 -3 4 105.29 4.61
 -1 -3 4 91.73 6.23
 -1 -3 4 102.94 7.57
 -1 -3 3 1511.21 31.77
 1 -3 -3 1481.39 30.54
 -1 -3 3 1418.54 25.56
 -1 -3 3 1485.58 26.93
 -1 -3 3 1511.03 33.37
 -1 -3 2 974.27 19.81
 1 -3 -2 1039.76 25.68
 -1 -3 2 1003.03 19.91
 1 -3 -2 989.1 18.69
 -1 -3 2 1002.43 24.35
 1 -3 -2 993.44 21.28
 -1 -3 2 1009.14 23.84
 1 -3 -2 1007.05 17.86
 -1 -3 1 188.66 8.24
 1 -3 -1 214.41 9.87
 -1 -3 1 190.73 6.79
 1 -3 -1 194.08 6.53
 -1 -3 1 186.41 6.9
 -1 -3 1 192.56 8.71
 1 -3 -1 185.8 7.81
 -1 -3 1 196.16 6.93
 1 -3 -1 192.77 7.09
 1 -3 -1 200.16 8.53
 1 -3 -1 199.61 6.12
 1 -3 -1 201.97 5.86
 -1 -3 1 194.13 8.3
 1 -3 0 197.85 6.51
 1 -3 0 171.28 4.41
 1 -3 0 189.37 7.88
 -1 -3 0 183.68 7.86
 -1 -3 0 177.09 7.24
 1 -3 0 185.17 5
 -1 -3 0 201.88 7.72
 -1 -3 0 205.94 7.67
 1 -3 0 177.59 7.68
 1 -3 0 201.49 8.14
 -1 -3 0 192.05 8.85
 1 -3 0 190.64 7.33
 1 -3 0 204.24 9.69
 1 -3 0 178.13 4.35
 -1 -3 0 195.65 7.47
 1 -3 1 11.87 1.79
 1 -3 1 9.91 1.58
 -1 -3 -1 8.91 1.87
 -1 -3 -1 14.87 2.4
 -1 -3 -1 9.94 1.47
 -1 -3 -1 8.69 1.43
 1 -3 1 11.63 1.87
 -1 -3 -1 11.05 1.92
 1 -3 1 3.8 1.57
 1 -3 1 8.48 2.34
 -1 -3 -2 555.77 16.61
 1 -3 2 554.03 17.26
 1 -3 2 552.06 17.99
 -1 -3 -2 548.73 12.08
 1 -3 2 537.65 15.56
 1 -3 2 553.56 13.46
 1 -3 3 368.88 10.8
 1 -3 3 393.23 14.99
 1 -3 3 382.85 14.91
 -1 -3 -3 372.59 8.43
 -1 -3 -3 399 14.53
 -1 -3 -4 116.3 3.99
 1 -3 4 107.18 7.75
 -1 -3 -4 114.49 3.63
 1 -3 4 133.07 8.98
 -1 -3 -4 128.62 8.55
 -1 -3 -5 429.79 17.18
 -1 -3 -5 395.88 8.93
 1 -3 5 416.17 17.5
 -1 -3 -5 379.35 8.26
 -1 -3 -5 391.81 8.71
 -1 -3 -6 133.36 9.85
 -1 -3 -6 118.9 4.32
 1 -3 6 132.36 9.18
 -1 -3 -6 121.92 4.56
 1 -3 6 124.27 9.97
 1 -3 7 244.74 13.16
 1 -3 7 208.51 13.61
 -1 -3 -7 228.24 13.85
 -1 -3 -8 56.05 7.35
 1 -3 8 59.17 6.75
 1 -3 8 74.81 8.46
 -1 -3 -9 57.42 7.73
 1 -3 9 56.37 6.97
 1 -3 9 59.57 8.11
 -1 -3 -10 7.53 3.53
 1 -3 10 13.15 4.39
 -1 -3 -11 0.02 2.45
 1 -3 11 3.73 3.15
 1 -3 12 -4.78 3.45
 -1 -2 14 1.76 3.01
 -1 -2 13 4.4 3.93
 1 -2 -13 6.78 3.77
 -1 -2 12 9.33 3.76
 1 -2 -12 7.26 3.93
 1 -2 -11 24.94 5.42
 -1 -2 11 30.63 5.95
 1 -2 -10 108.64 10.08
 -1 -2 10 106.88 10.15
 1 -2 -9 27.78 5.1
 1 -2 -9 28.18 2.86
 -1 -2 9 21.61 4.63
 -1 -2 8 170.66 11.56
 -1 -2 8 163.79 6.69
 1 -2 -8 160.48 6.68
 1 -2 -8 164.81 6.4
 1 -2 -8 180.56 11.33
 -1 -2 7 36.27 5.04
 1 -2 -7 38.91 3.35
 -1 -2 7 43.81 4.56
 1 -2 -7 35.76 4.84
 1 -2 -7 38.68 2.6
 -1 -2 7 40.88 3.39
 -1 -2 7 41.4 3.39
 1 -2 -6 65.48 4.34
 -1 -2 6 69.4 6.5
 -1 -2 6 66.92 4.46
 -1 -2 6 65.56 4.43
 1 -2 -6 58.08 2.71
 -1 -2 6 65.72 5
 1 -2 -6 61.76 5.76
 -1 -2 5 346.37 11.15
 -1 -2 5 342.24 11.01
 -1 -2 5 346.24 11.2
 -1 -2 5 337.52 13.81
 1 -2 -5 343.15 13.18
 -1 -2 5 355.51 11.58
 1 -2 -5 341.78 10.94
 1 -2 -5 337.67 10.92
 -1 -2 4 579.16 15.55
 -1 -2 4 586.08 13.88
 -1 -2 4 594.22 15.66
 -1 -2 4 601.72 15.18
 1 -2 -4 575.39 14.84
 -1 -2 4 589.33 17.75
 -1 -2 4 562.74 14.26
 1 -2 -4 611.01 16.86
 -1 -2 3 911.45 17.76
 -1 -2 3 932.1 18.62
 -1 -2 3 934.29 22.25
 1 -2 -3 919.39 20.36
 -1 -2 3 922.82 21.06
 -1 -2 3 907.21 20.94
 -1 -2 3 903.72 19.91
 1 -2 -3 915.02 20.76
 1 -2 -2 1297.57 24.86
 1 -2 -2 1328.91 22.52
 -1 -2 2 1323.66 27.12
 1 -2 -2 1311.67 25.79
 -1 -2 2 1249.9 23.73
 1 -2 -2 1349.93 26.46
 -1 -2 2 1318.12 23.68
 -1 -2 2 1280.41 25.25
 -1 -2 2 1300.64 26.34
 -1 -2 2 1340.11 26.81
 1 -2 -2 1287.47 26.34
 1 -2 -2 1272.26 21
 -1 -2 2 1316.8 26.75
 -1 -2 2 1330.38 27.13
 1 -2 -1 1952.87 34.3
 -1 -2 1 1973.38 36.64
 1 -2 -1 1943.1 32.23
 -1 -2 1 1965.54 32.83
 1 -2 -1 1883.41 31.57
 -1 -2 1 1904.39 35.49
 -1 -2 1 1943.72 34.51
 -1 -2 1 1937.22 32.9
 1 -2 -1 1965.07 36.32
 1 -2 -1 1908.88 32.25
 1 -2 -1 1890.22 35.8
 1 -2 -1 1877.74 33.56
 -1 -2 1 1974.16 36.74
 -1 -2 1 1980.9 34.57
 1 -2 -1 1938.39 31.48
 -1 -2 1 2034.45 34.98
 1 -2 0 2195.86 35.83
 1 -2 0 2232.23 39.7
 -1 -2 0 2235.39 40.01
 1 -2 0 2150.4 39.95
 1 -2 0 2168.95 36.92
 1 -2 0 2157.58 36.15
 -1 -2 0 2168.93 38.58
 1 -2 0 2209.08 33.61
 1 -2 0 2170.97 37.68
 -1 -2 0 2222.69 40.2
 1 -2 0 2183.17 37.84
 -1 -2 0 2089.79 39.89
 -1 -2 0 2215.14 39.58
 -1 -2 0 2194.8 38.15
 -1 -2 0 2155 36.52
 -1 -2 0 2160.13 37.42
 1 -2 1 1218.55 24.96
 -1 -2 -1 1169.96 25.15
 1 -2 1 1172.4 23.52
 -1 -2 -1 1209.77 25.39
 -1 -2 -1 1232.84 25.87
 1 -2 1 1167.93 25.77
 -1 -2 -1 1145.45 24.22
 -1 -2 -1 1182.03 25.17
 -1 -2 -1 1220.54 24.69
 1 -2 1 1220.46 22.52
 -1 -2 -1 1186.45 25.37
 1 -2 1 1198.98 24.82
 -1 -2 -1 1206.8 24.5
 -1 -2 -1 1159.67 20.91
 1 -2 1 1181.83 24.74
 1 -2 1 1225.35 20.93
 -1 -2 -2 3224.33 57.18
 1 -2 2 3299.11 54.63
 1 -2 2 3213.97 48.66
 -1 -2 -2 3012.41 54.12
 -1 -2 -2 3336.51 56.39
 1 -2 2 3172.92 56.34
 1 -2 2 3287.85 56.41
 -1 -2 -2 3177.18 55.77
 -1 -2 -2 3109.2 54.7
 -1 -2 -2 3092.35 49.19
 1 -2 2 3208.09 56.21
 1 -2 2 3254.84 55.44
 -1 -2 -2 3260.62 54.98
 1 -2 3 10.83 2.32
 -1 -2 -3 6.61 1.54
 1 -2 3 11.15 1.25
 -1 -2 -3 9.62 1.15
 -1 -2 -3 8.59 1.69
 1 -2 3 11.09 2.23
 -1 -2 -3 7.97 2
 -1 -2 -4 173.35 9.4
 -1 -2 -4 169.38 5.7
 -1 -2 -4 162.46 7.22
 1 -2 4 171.42 7.38
 1 -2 4 164.78 6.81
 -1 -2 -4 156.46 7.16
 -1 -2 -4 166.22 5.75
 1 -2 4 176.24 8.81
 1 -2 4 195.34 9.94
 -1 -2 -5 223.66 8.44
 -1 -2 -5 260.33 12.36
 1 -2 5 214.57 9.05
 -1 -2 -5 208.61 7.37
 -1 -2 -5 218.9 8.49
 1 -2 5 237.43 11.89
 1 -2 5 232.69 8.66
 1 -2 5 249.09 11.28
 -1 -2 -5 229.92 7.49
 1 -2 6 242.73 8.88
 -1 -2 -6 260.94 8.86
 1 -2 6 242.03 12.88
 -1 -2 -6 246.27 8.83
 -1 -2 -6 254.02 8.95
 -1 -2 -6 263.4 13.28
 -1 -2 -6 235.3 8.59
 1 -2 6 265.39 12.33
 -1 -2 -7 37.32 3.52
 1 -2 7 37.01 5.42
 -1 -2 -7 32.58 3.26
 1 -2 7 41 5.2
 -1 -2 -7 41.99 3.19
 -1 -2 -7 35.26 2.92
 1 -2 8 22.15 4.55
 -1 -2 -8 24.14 4.76
 1 -2 8 16.23 3.66
 -1 -2 -8 21.48 2.86
 1 -2 9 16.46 4.18
 -1 -2 -9 22.15 4.84
 1 -2 10 9.59 3.01
 -1 -2 -10 21.72 4.99
 1 -2 10 19.04 4.83
 -1 -2 -11 6.01 3.8
 1 -2 11 7.63 2.96
 1 -2 11 0.63 2.75
 1 -2 12 5.5 3.39
 -1 -2 -12 5.54 3.9
 1 -2 13 1.8 2.91
 -1 -1 14 2.87 2.74
 -1 -1 14 4.49 3.28
 -1 -1 13 2.22 2.92
 1 -1 -13 5.66 3.37
 -1 -1 13 1.16 2.58
 1 -1 -12 9.61 3.96
 -1 -1 12 1.8 2.13
 1 -1 -11 25.73 5.39
 -1 -1 11 30.28 5.3
 1 -1 -11 26.86 3.82
 1 -1 -10 19.65 3.12
 1 -1 -10 19.24 4.49
 -1 -1 10 18.91 4.21
 1 -1 -9 76.03 5.57
 -1 -1 9 81.81 4.03
 -1 -1 9 79.74 7.69
 1 -1 -9 72.93 7.36
 1 -1 -8 42.84 5.46
 -1 -1 8 44.63 2.78
 1 -1 -8 30.17 3.24
 -1 -1 8 46.82 5.63
 1 -1 -7 407.67 10.9
 1 -1 -7 396.83 11.91
 -1 -1 7 421.85 16.06
 1 -1 -7 405.26 15.82
 -1 -1 7 406.24 8.62
 -1 -1 7 416.5 9.55
 -1 -1 6 211.18 6.26
 1 -1 -6 237.84 7.42
 1 -1 -6 249.69 11.16
 1 -1 -6 226.07 7.71
 -1 -1 6 232.61 10.93
 1 -1 -6 203.19 6.18
 1 -1 -5 3298.27 58.62
 1 -1 -5 3263.57 52.15
 -1 -1 5 3212.49 56.66
 -1 -1 5 3251.19 51.89
 1 -1 -5 3260.15 52.23
 -1 -1 5 3189.46 58.52
 -1 -1 5 3275.64 51.38
 -1 -1 5 3350.13 55.13
 1 -1 -4 228.77 6.11
 1 -1 -4 231.37 6.82
 -1 -1 4 243.48 7
 -1 -1 4 246.8 8.58
 -1 -1 4 234.3 7.55
 -1 -1 4 247.02 9.54
 1 -1 -4 253.1 9.46
 1 -1 -4 238.85 9.12
 -1 -1 4 231.27 7.07
 -1 -1 4 233.85 8.26
 -1 -1 4 240.23 9.39
 1 -1 -3 1848.02 28.62
 -1 -1 3 1821.21 33.82
 1 -1 -3 1843.22 30.6
 1 -1 -3 1875.36 33.62
 -1 -1 3 1778.64 31.99
 -1 -1 3 1809.86 30.69
 1 -1 -3 1845.24 33.27
 -1 -1 3 1864.35 31.6
 -1 -1 3 1740.87 31.59
 -1 -1 3 1847.72 31.3
 -1 -1 3 1906.9 34.15
 -1 -1 2 2720.21 43.34
 -1 -1 2 2635.32 43.86
 1 -1 -2 2700.7 43.84
 -1 -1 2 2725.57 44.94
 -1 -1 2 2675.94 43.04
 1 -1 -2 2696.8 44.12
 -1 -1 2 2758.6 44.86
 -1 -1 2 2719 42.25
 -1 -1 2 2732.86 44.31
 1 -1 -1 1563.54 26.42
 -1 -1 1 1582.64 26.35
 1 -1 -1 1590.41 26.17
 -1 -1 1 1611.78 28.14
 -1 -1 1 1596.98 26.8
 -1 -1 1 1551.41 27.8
 1 -1 -1 1546.3 26.03
 -1 -1 1 1654.15 25.83
 -1 -1 1 1589.9 25.69
 1 -1 -1 1594.37 25.26
 -1 -1 1 1587.07 26.98
 -1 -1 1 1628.96 27.89
 1 -1 -1 1555.21 25.8
 -1 -1 1 1629.6 26.7
 1 -1 -1 1573.38 27.58
 -1 -1 0 280.24 7.67
 -1 -1 0 286.16 7.94
 -1 -1 0 272.87 7.32
 -1 -1 0 275.61 6.66
 -1 -1 0 292.43 8.04
 -1 -1 0 297.18 8.14
 1 -1 0 279.24 7.26
 -1 -1 0 295.28 8.02
 1 -1 0 287.2 8.05
 1 -1 0 279.6 7.1
 -1 -1 0 284.32 7.53
 1 -1 0 284.32 5.9
 -1 -1 0 291.22 5.9
 1 -1 1 135.58 5.57
 1 -1 1 132.94 5.41
 -1 -1 -1 149.49 5.8
 -1 -1 -1 136.83 5.1
 -1 -1 -1 137.27 4.31
 1 -1 1 137.07 5.38
 -1 -1 -1 131.49 5.36
 -1 -1 -1 142.2 5.58
 -1 -1 -1 139.78 5.13
 -1 -1 -1 135.61 5.21
 -1 -1 -1 133.05 5.73
 -1 -1 -1 136.33 5.57
 1 -1 2 986.67 18.12
 -1 -1 -2 935.74 17.56
 1 -1 2 971.76 20.8
 1 -1 2 947.92 20.75
 -1 -1 -2 929.1 20.75
 -1 -1 -2 955.6 18.4
 1 -1 2 988.33 20.4
 1 -1 2 993.91 21.15
 -1 -1 -2 969.36 20.45
 -1 -1 -2 958.08 20.38
 -1 -1 -2 959.85 21.58
 -1 -1 -2 955.61 19.25
 -1 -1 -2 958.61 18.74
 1 -1 3 121.36 5.31
 -1 -1 -3 116.18 4.7
 1 -1 3 118.86 5.44
 1 -1 3 105.9 6.43
 -1 -1 -3 121.1 4.64
 1 -1 3 123.58 6.51
 -1 -1 -3 117.25 6.58
 1 -1 3 122.52 6.46
 -1 -1 -3 119.56 4.88
 -1 -1 -3 119.92 5.42
 1 -1 3 110.52 5.82
 -1 -1 -3 103.89 5.8
 -1 -1 -3 119.3 6.23
 -1 -1 -3 132.92 7.18
 -1 -1 -4 250.99 8.41
 -1 -1 -4 243.78 8.19
 -1 -1 -4 252.8 8.78
 1 -1 4 234.62 9.23
 -1 -1 -4 266.53 10.9
 1 -1 4 257.87 10.56
 -1 -1 -4 249.52 6.92
 -1 -1 -4 247.22 7.1
 1 -1 4 266.1 10.18
 -1 -1 -5 134.84 6.54
 -1 -1 -5 133.77 6.41
 1 -1 5 122.36 7.73
 1 -1 5 141.9 7.88
 -1 -1 -5 132 8.26
 -1 -1 -5 126.93 4.61
 1 -1 5 130.14 4.62
 -1 -1 -5 137.61 4.56
 1 -1 6 88.36 3.36
 -1 -1 -6 92.56 5.81
 1 -1 6 88.83 7.09
 -1 -1 -6 95.88 7.6
 -1 -1 -6 90.23 3.38
 1 -1 7 631.07 21.68
 -1 -1 -7 644.18 18.54
 1 -1 7 648.93 19.68
 -1 -1 -7 660.88 22.47
 1 -1 8 79.97 5.43
 1 -1 8 69.01 7.11
 1 -1 8 59.23 5.98
 -1 -1 -8 75.94 7.6
 -1 -1 -8 75.88 6.09
 1 -1 9 55.1 6.28
 -1 -1 -9 65.26 5.94
 1 -1 9 65.53 5.12
 -1 -1 -9 68.25 7.65
 1 -1 9 67.82 7.6
 1 -1 10 18.42 4.51
 -1 -1 -10 13.09 3.84
 -1 -1 -10 14.97 3.23
 1 -1 10 16.11 3.93
 1 -1 11 33.31 6.09
 1 -1 11 38.99 6.13
 1 -1 11 38.22 6.19
 -1 -1 -11 44.25 7.03
 -1 -1 -12 13.56 4.67
 1 -1 12 16.02 4.25
 1 -1 12 15.51 4.41
 1 -1 12 16.57 4.38
 1 -1 13 8.53 3.9
 -1 -1 -13 14.3 4.68
 1 -1 13 9.19 3.79
 -1 0 14 -1.99 3.31
 1 0 -14 -5.85 3.57
 -1 0 14 3.44 3.37
 1 0 -13 13.09 4.28
 -1 0 13 10.59 4.12
 -1 0 13 12.52 4.52
 1 0 -12 29.14 5.6
 -1 0 12 34.48 5.59
 1 0 -12 25.48 4.31
 -1 0 12 19.05 4.92
 -1 0 11 32.61 5.71
 -1 0 11 29.08 4.9
 1 0 -11 32.26 5.67
 1 0 -11 22.97 4.09
 -1 0 10 133.43 9.7
 1 0 -10 134.41 8.84
 1 0 -10 124.18 9.93
 -1 0 9 8.32 2.78
 -1 0 9 9.97 1.51
 1 0 -9 7.14 2.28
 1 0 -9 7.19 2.82
 -1 0 8 52.89 5.35
 1 0 -8 47.36 4.64
 -1 0 8 46.07 2.96
 1 0 -8 55.69 5.83
 -1 0 7 198.65 9.72
 -1 0 7 201.41 6.23
 1 0 -7 224.85 9.63
 1 0 -7 217.11 10.77
 1 0 -6 626.69 16.71
 -1 0 6 627.29 12.49
 1 0 -6 663.36 18.66
 -1 0 6 629.62 17.62
 1 0 -5 109.59 5.53
 1 0 -5 121.29 5.98
 -1 0 5 106.34 5.88
 -1 0 5 113.55 5.99
 1 0 -5 106.12 6.23
 -1 0 5 112.36 3.53
 1 0 -5 100.88 3.05
 1 0 -5 110.82 5.73
 -1 0 4 219.92 7.7
 1 0 -4 217.98 5
 -1 0 4 207.38 8.21
 1 0 -4 214.93 8.21
 1 0 -4 216.49 7.27
 1 0 -4 208.44 8.08
 -1 0 4 214.81 7.59
 -1 0 4 204.44 4.6
 1 0 -3 2720.64 46.56
 -1 0 3 2764.22 46.68
 1 0 -3 2897.81 46.9
 -1 0 3 2758.36 45.49
 1 0 -3 2931.81 45.24
 -1 0 3 2739.59 45.53
 -1 0 3 2901.56 47.01
 -1 0 2 183.88 5.64
 1 0 -2 185.57 4.99
 1 0 -2 174.65 5.62
 1 0 -2 171.2 5.51
 -1 0 2 168.6 4.92
 -1 0 2 173.34 5.56
 1 0 1 138.04 4.9
 -1 0 -1 131.94 4.03
 1 0 1 136.04 4.83
 -1 0 -1 139.06 4.02
 1 0 1 135.07 4.48
 -1 0 -1 137.34 4.88
 1 0 1 134.09 4.56
 -1 0 -1 136.83 4.85
 -1 0 -1 140 4.96
 -1 0 -1 134.66 4.54
 -1 0 -2 8600 140.69
 1 0 2 8724.48 141.12
 1 0 2 9449.23 141.69
 1 0 2 8699.72 141.48
 -1 0 -2 9999 141.33
 1 0 2 9586.09 139.82
 1 0 2 9861.25 140.65
 -1 0 -2 9686.4 140.77
 1 0 3 339.3 11.17
 -1 0 -3 304.1 9.64
 -1 0 -3 328.61 10.73
 -1 0 -3 319.31 10.33
 -1 0 -3 323.38 10.35
 1 0 3 323.82 9.54
 1 0 3 315.88 10.5
 1 0 3 327.58 9.85
 -1 0 -3 308.81 9.84
 1 0 3 323.48 8.72
 1 0 3 327.79 10.63
 1 0 3 324.67 6.6
 1 0 4 358.58 9.8
 -1 0 -4 335.39 12.02
 1 0 4 319.13 6.57
 1 0 4 336.72 10.93
 1 0 4 358.62 11.33
 -1 0 -4 337.46 11.04
 -1 0 -4 345.04 11.23
 -1 0 -4 353.66 11.93
 1 0 5 72.48 4.31
 1 0 5 70.61 5.16
 1 0 5 61.81 4.82
 -1 0 -5 73.67 5.28
 -1 0 -5 70.27 5.6
 -1 0 -6 98.28 7.2
 1 0 6 103.73 6.87
 1 0 6 101.63 5.5
 -1 0 -6 99.38 6.7
 1 0 6 109.29 7.11
 1 0 7 31.26 3.27
 -1 0 -7 40.5 5
 1 0 7 30.38 4.19
 1 0 7 31.79 4.3
 -1 0 -7 33.82 4.19
 1 0 8 100.55 8.12
 1 0 8 100.58 7.81
 1 0 8 83.62 7.41
 1 0 8 94.8 5.98
 -1 0 -8 96.6 7.48
 -1 0 -8 90.77 7.97
 1 0 9 73.61 5.47
 -1 0 -9 64.57 6.45
 1 0 9 57.49 6.72
 1 0 9 72.7 7.42
 1 0 9 57.53 6.31
 -1 0 -9 65.12 7.15
 1 0 10 5.74 2.8
 1 0 10 6.3 2.88
 -1 0 -10 11.81 3.49
 1 0 10 10.56 3.19
 -1 0 -10 9.04 2.99
 1 0 11 8.31 3.19
 -1 0 -11 8 3.26
 -1 0 -11 8.65 3.02
 1 0 11 11.31 3.9
 1 0 11 11.97 3.75
 -1 0 -12 108.42 10.95
 1 0 12 82.6 9.51
 1 0 12 105.78 10.85
 1 0 12 85.95 8.97
 -1 0 -12 84.19 8.56
 -1 0 -13 20.17 5.39
 1 0 13 16.01 5.04
 1 0 13 11.44 4.35
 1 1 -14 5.36 3.9
 -1 1 13 8.52 4.4
 1 1 -13 2.65 2.64
 -1 1 13 7.5 3.56
 1 1 -13 6.37 2.72
 -1 1 12 1.66 2.5
 -1 1 12 2 2.33
 1 1 -12 4.84 2.87
 1 1 -12 6.66 2.81
 -1 1 11 38.86 6.44
 -1 1 11 35 6.01
 1 1 -11 27.08 4.77
 1 1 -11 30.54 5.26
 -1 1 11 26.77 4.2
 -1 1 10 11.85 3.93
 1 1 -10 20.62 3.93
 -1 1 10 27.53 5.23
 -1 1 10 21.66 3.67
 1 1 -10 21.35 4.25
 1 1 -9 70.07 6.69
 -1 1 9 73.72 7.55
 -1 1 9 70.83 5.82
 1 1 -9 81.13 7.27
 -1 1 8 54.14 6.07
 -1 1 8 44.5 4.26
 1 1 -8 46.65 5.12
 1 1 -8 45.29 5.02
 1 1 -7 401.2 14.5
 1 1 -7 450.46 15.5
 -1 1 7 416.27 16.24
 -1 1 7 414.76 12.86
 -1 1 7 405.83 12.71
 -1 1 7 371.8 8.14
 1 1 -6 241.37 6.55
 1 1 -6 245.2 10.57
 -1 1 6 219.78 6.25
 1 1 -6 228.82 9.76
 -1 1 6 237.85 8.52
 -1 1 6 228.92 8.34
 1 1 -5 3266.77 54.47
 1 1 -5 3291.69 51.01
 -1 1 5 3242.79 52.46
 1 1 -5 3310.79 55.69
 -1 1 5 3273.17 52.43
 1 1 -5 3303.8 57.12
 -1 1 4 251.02 9.76
 1 1 -4 251.01 9.14
 1 1 -4 234.04 7
 -1 1 4 242.62 6.74
 -1 1 4 235.15 6.8
 1 1 -4 256.72 9.43
 1 1 -4 241.4 8.23
 1 1 -4 234.03 7.68
 -1 1 4 238.91 6.67
 1 1 -4 241.09 8.53
 -1 1 3 1774.39 29.35
 1 1 -3 1732.73 31.6
 1 1 -3 1750.3 30.6
 -1 1 3 1695.8 27.16
 1 1 -3 1753.34 30.2
 1 1 -3 1732.46 29.35
 -1 1 3 1746.29 32.17
 1 1 -3 1724.75 29.59
 1 1 -3 1733.97 29.81
 -1 1 3 1629.45 27.08
 1 1 -2 2794.66 43.62
 1 1 -2 2693.49 44.25
 -1 1 2 2624.65 44.17
 1 1 -2 2797.47 44.06
 -1 1 2 2688.27 42.75
 1 1 -2 2646.77 42.18
 1 1 -2 2713.74 43.82
 -1 1 2 2700.37 43.43
 1 1 -2 2626.6 43.39
 -1 1 2 2746.89 44.32
 1 1 -1 1567.37 26.71
 -1 1 1 1568.61 26.22
 1 1 -1 1603.43 27.91
 -1 1 1 1590.39 25.46
 -1 1 1 1634.46 26.37
 1 1 -1 1578.73 26.9
 -1 1 1 1562.37 26.41
 -1 1 1 1590.39 27.48
 -1 1 1 1634.47 25.88
 -1 1 1 1607.72 27.8
 1 1 -1 1629.35 26.77
 -1 1 1 1615.89 26.09
 1 1 -1 1602.56 27.99
 1 1 0 277.77 7.71
 -1 1 0 273.36 7.75
 1 1 0 281.45 7.22
 1 1 0 266.95 5.67
 1 1 0 276.77 7.69
 1 1 0 275.34 7.41
 1 1 0 266.66 7.68
 -1 1 0 264.54 7.34
 1 1 0 278.59 7.74
 -1 1 0 271.67 7.15
 -1 1 0 268.73 5.7
 1 1 0 276.68 7.3
 -1 1 0 268.84 6.86
 -1 1 -1 154.69 5.97
 1 1 1 143.41 5.6
 1 1 1 154.17 6.09
 1 1 1 140.74 5.22
 1 1 1 152.87 4.51
 -1 1 -1 151.71 5.22
 1 1 1 152.39 5.79
 -1 1 -1 147.27 5.64
 -1 1 -1 157.41 4.23
 -1 1 -1 159.72 5.9
 -1 1 -1 142.43 5.67
 1 1 1 152.21 5.42
 1 1 1 156.56 5.45
 1 1 2 922.37 21
 1 1 2 982.06 18.5
 1 1 2 959.55 20.27
 -1 1 -2 943.35 20.57
 -1 1 -2 939.89 17.89
 -1 1 -2 917.79 20.57
 1 1 2 956.76 21.45
 -1 1 -2 968.82 18.27
 1 1 2 1000.95 20.57
 1 1 2 939.66 18.95
 1 1 2 993.43 19.3
 -1 1 -2 989.52 20.56
 -1 1 -3 120.98 6.4
 1 1 3 116.68 4.64
 -1 1 -3 129.29 5.49
 1 1 3 127.07 6.09
 1 1 3 125.38 5.52
 1 1 3 117.77 6.57
 -1 1 -3 127.26 6.61
 1 1 3 121.31 4.67
 -1 1 -3 114.24 6.1
 -1 1 -3 121.89 4.68
 1 1 3 117.19 6.15
 -1 1 -3 116.49 5.23
 1 1 3 123.16 6.28
 -1 1 -4 254.27 10.4
 1 1 4 255.28 10.19
 1 1 4 245.45 9.92
 1 1 4 248.4 8.07
 1 1 4 239.78 10.03
 -1 1 -4 259.23 7.19
 -1 1 -4 244.03 9.02
 -1 1 -4 242.92 8.88
 1 1 4 238.54 8.56
 1 1 4 241.63 6.98
 -1 1 -5 128.45 6.99
 1 1 5 139.97 6.44
 -1 1 -5 125.79 4.69
 1 1 5 143.71 8.14
 1 1 5 126.88 6.38
 -1 1 -5 127.12 7.79
 1 1 5 124.58 7.69
 -1 1 -5 152.16 7.61
 -1 1 -6 106.84 7.65
 -1 1 -6 93.13 6.56
 1 1 6 99.63 7.41
 1 1 6 98.5 5.89
 -1 1 -6 98.45 3.84
 1 1 6 101.59 6.03
 1 1 6 103.36 7.48
 -1 1 -7 658.18 21.43
 1 1 7 618.63 18.12
 -1 1 -7 663.51 20.42
 1 1 7 640.17 21.6
 1 1 7 630.84 17.67
 1 1 7 681.82 22.04
 -1 1 -8 71.99 6.76
 1 1 8 66.24 5.7
 1 1 8 72.82 7.28
 1 1 8 84.03 7.8
 1 1 8 76.88 5.69
 -1 1 -8 71.31 7.03
 1 1 9 68.87 5.63
 1 1 9 77.2 8.05
 -1 1 -9 71.9 7.14
 1 1 9 68.22 6.18
 1 1 9 66.87 7.49
 -1 1 -9 70.59 7.33
 1 1 10 20.91 4.66
 1 1 10 18.64 4.61
 -1 1 -10 13.55 3.8
 -1 1 -10 20.43 4.24
 1 1 10 13.99 3.17
 1 1 10 18.97 3.19
 1 1 11 28.66 5.98
 1 1 11 41.2 6.78
 -1 1 -11 28.79 5.53
 -1 1 -11 36.85 5.99
 1 1 12 18.69 5.15
 -1 1 -12 12.67 3.96
 -1 1 -12 19.89 4.76
 1 1 12 22.41 5.61
 1 1 13 14.39 5.23
 1 1 13 19.2 5.37
 -1 1 -13 11.1 3.69
 -1 1 -13 18.65 5.05
 1 2 -14 0.85 2.4
 -1 2 13 1.85 2.37
 -1 2 13 4.61 3.54
 1 2 -13 3.22 2.48
 1 2 -13 1.73 2.41
 1 2 -12 7.77 3.24
 1 2 -12 13.22 3.93
 -1 2 12 16.3 4.83
 -1 2 12 10.31 4.51
 -1 2 11 26.95 5.77
 1 2 -11 30.56 5.37
 -1 2 11 23.84 5.47
 1 2 -11 24.97 4.57
 1 2 -10 95.09 8.8
 1 2 -10 89.73 7.93
 -1 2 10 95.99 9.65
 -1 2 10 107.69 10.18
 -1 2 9 32.19 3.21
 -1 2 9 23.97 4.83
 1 2 -9 22.49 4.25
 1 2 -9 31.68 4.38
 -1 2 9 30.08 5.28
 -1 2 8 158.98 10.94
 1 2 -8 157.66 10.22
 -1 2 8 165.38 11.1
 1 2 -8 155.1 9.04
 -1 2 8 164.04 6.72
 -1 2 8 143.2 6.21
 -1 2 7 29.31 4.49
 -1 2 7 41.32 2.88
 -1 2 7 39.49 3.36
 -1 2 7 36.99 5.02
 1 2 -7 38.4 4.07
 1 2 -7 38.13 3.67
 1 2 -7 42.88 5.04
 -1 2 6 56.5 4.1
 -1 2 6 61.34 2.94
 1 2 -6 63.28 5.78
 -1 2 6 64.43 6.07
 -1 2 6 51.22 5.47
 1 2 -6 62.42 4.7
 1 2 -6 57.98 4.27
 1 2 -5 352.2 13.1
 1 2 -5 359.31 11.08
 -1 2 5 331.79 10.72
 1 2 -5 338.25 11.02
 -1 2 5 357.92 13.61
 -1 2 5 315.16 6.62
 -1 2 5 354.51 13.63
 1 2 -5 339.51 11.64
 1 2 -5 319.08 10.48
 1 2 -5 340.75 11.23
 1 2 -4 584.58 15.21
 -1 2 4 589.38 17.09
 -1 2 4 579.41 17.1
 1 2 -4 601.59 14.78
 1 2 -4 582.15 14.82
 -1 2 4 564.1 15.04
 -1 2 4 592.37 14.26
 1 2 -4 593.49 17.02
 1 2 -4 592.18 15.4
 1 2 -4 582.64 15.52
 1 2 -3 908.6 20.61
 -1 2 3 905.4 20.41
 1 2 -3 891.77 18.58
 1 2 -3 892.66 20.72
 -1 2 3 875.97 17.74
 -1 2 3 909.83 21.27
 1 2 -3 928.77 21.36
 -1 2 3 889.77 21.22
 1 2 -3 883.72 18.53
 1 2 -3 949.03 19.78
 -1 2 3 920.67 21.1
 1 2 -2 1364.77 27.09
 -1 2 2 1330.86 26.09
 1 2 -2 1339.86 27.21
 -1 2 2 1316.61 22.78
 1 2 -2 1419.58 25.57
 1 2 -2 1305.59 23.69
 1 2 -2 1327.36 26.25
 -1 2 2 1331.04 26.43
 1 2 -2 1294.82 23.68
 -1 2 2 1256.45 21.3
 -1 2 2 1289.31 21.34
 -1 2 2 1353.13 25.6
 -1 2 2 1310.01 26.68
 1 2 -2 1283.75 21.64
 -1 2 1 1912.14 32.25
 1 2 -1 1961.72 36.56
 -1 2 1 1927.81 33.7
 -1 2 1 1931.9 31.46
 -1 2 1 1907.44 35.89
 -1 2 1 1944.01 32.32
 1 2 -1 1899.83 32.32
 1 2 -1 2055.9 36.52
 1 2 -1 1969.5 33.96
 1 2 -1 1915.35 32.66
 -1 2 1 1913.91 34.13
 1 2 -1 1910.33 35.42
 -1 2 1 1943.24 32.4
 1 2 0 2211.32 39.51
 -1 2 0 2190.52 37.45
 1 2 0 2156.69 37.48
 -1 2 0 2112.36 39.22
 1 2 0 2179.65 39
 -1 2 0 2209.82 39.7
 -1 2 0 2125.98 35.89
 1 2 0 2169.06 37.1
 -1 2 0 2177.73 35.55
 -1 2 0 2133.37 37.33
 -1 2 0 2143.58 33.23
 -1 2 0 2134.57 36.65
 1 2 0 2163.19 35.89
 1 2 0 2130.29 39.7
 1 2 1 1183.91 25.39
 -1 2 -1 1174.73 24.57
 1 2 1 1200.13 25.24
 -1 2 -1 1206.42 24.77
 1 2 1 1136.35 24.85
 1 2 1 1182.86 24.84
 -1 2 -1 1182.44 23.47
 -1 2 -1 1179.62 24.76
 -1 2 -1 1187.93 25.32
 1 2 2 3187.41 56.29
 -1 2 -2 3166.1 47.96
 1 2 2 3284.76 54.7
 -1 2 -2 3215.34 56.15
 -1 2 -2 3175.96 54.48
 1 2 2 3219.96 50.12
 1 2 2 3270 56.71
 1 2 2 3055.25 54.72
 -1 2 -2 3171.09 48.43
 -1 2 -2 3224.64 56.28
 1 2 2 3254.22 54.74
 -1 2 -2 3274.53 56.38
 -1 2 -3 14.09 1.53
 -1 2 -3 12.94 1.41
 1 2 3 12.05 2.02
 1 2 3 7.97 2.06
 -1 2 -3 14.16 2.12
 1 2 3 10.82 2.31
 1 2 3 11.77 2.13
 1 2 3 12.13 1.69
 1 2 3 11.84 2.02
 -1 2 -3 9.07 2.15
 1 2 4 179.2 9.39
 -1 2 -4 175.47 6.62
 1 2 4 171.36 7.42
 -1 2 -4 180.62 7.63
 1 2 4 186.19 8.29
 1 2 4 185.91 9.52
 1 2 4 184.08 7.95
 1 2 4 171.47 7.54
 -1 2 -4 187.7 9.71
 -1 2 -4 172.31 6.76
 1 2 5 231.64 11.47
 -1 2 -5 231.7 11.52
 -1 2 -5 225.85 8.62
 1 2 5 224.02 9.71
 1 2 5 228.16 11.39
 -1 2 -5 229.88 8.99
 -1 2 -5 240.69 8.84
 -1 2 -6 246.59 9.97
 -1 2 -6 269.02 13.13
 1 2 6 253.36 12.95
 -1 2 -6 241.55 8.93
 1 2 6 261.22 12.92
 -1 2 -6 238.64 9.66
 1 2 6 256.96 10.85
 1 2 7 35.11 5.07
 1 2 7 48.35 5.94
 1 2 7 32.37 3.92
 -1 2 -7 42.03 4.4
 -1 2 -7 35.78 3.17
 -1 2 -7 30.38 4.68
 1 2 8 24.3 4.72
 1 2 8 18.31 3.24
 1 2 8 16.65 4
 -1 2 -8 20.07 4.34
 1 2 8 20.61 2.7
 -1 2 -8 18.31 3.36
 1 2 9 20.89 4.68
 1 2 9 16.26 4.17
 -1 2 -9 15.21 3.87
 1 2 9 13.41 3.05
 -1 2 -9 7.89 2.52
 1 2 10 21.74 5.04
 1 2 10 14.23 3.15
 -1 2 -10 14.76 4.07
 -1 2 -10 16.72 3.85
 1 2 10 22.85 4.97
 -1 2 -11 8.84 3.21
 1 2 11 2.62 2.47
 1 2 11 1.51 2.4
 -1 2 -11 9.64 3.91
 1 2 12 3.43 2.92
 1 2 12 10.27 4.03
 -1 2 -12 7.46 3.41
 -1 2 -13 -1.56 2.06
 1 3 -13 4.86 3.1
 -1 3 12 21.65 5.63
 -1 3 12 30.83 6.39
 1 3 -12 19.82 5.03
 -1 3 11 15.1 4.49
 1 3 -11 15.8 4.23
 -1 3 10 2.69 1.85
 -1 3 10 10.35 3.68
 1 3 -10 9.37 3.56
 1 3 -10 6.86 2.61
 1 3 -9 52.45 5.41
 1 3 -9 50.93 6.7
 -1 3 9 56.62 7.3
 -1 3 9 45.55 6.77
 -1 3 8 94.74 8.85
 -1 3 8 83.18 8.38
 1 3 -8 86.79 6.33
 -1 3 8 71.79 5.65
 1 3 -8 82.73 8
 1 3 -7 62.72 6.63
 -1 3 7 68.06 7.15
 -1 3 7 58.06 6.5
 -1 3 7 61.01 5.31
 1 3 -7 59.73 4.84
 1 3 -7 65.21 5.49
 1 3 -7 59.36 3.61
 -1 3 6 114.09 8.59
 1 3 -6 105.55 8.08
 1 3 -6 110.09 6.59
 -1 3 6 120.07 8.86
 -1 3 6 97.72 6.67
 1 3 -6 95.09 3.78
 -1 3 6 114.69 6.46
 1 3 -6 95.3 6.75
 1 3 -5 1308.88 27.2
 -1 3 5 1222.7 29.63
 1 3 -5 1294.88 30.3
 1 3 -5 1341.56 32.09
 -1 3 5 1320.25 32.6
 1 3 -5 1304.22 27.16
 -1 3 5 1343.28 26.63
 -1 3 5 1296.12 32.51
 1 3 -4 100.72 5.24
 -1 3 4 102.12 4.89
 1 3 -4 104.78 6.99
 -1 3 4 100.5 6.79
 1 3 -4 92.04 6.43
 -1 3 4 114.69 7.63
 1 3 -4 105.45 7.12
 -1 3 4 95.92 7
 1 3 -4 101.63 5.27
 1 3 -3 1571.57 32.67
 1 3 -3 1452.75 32.37
 1 3 -3 1457.64 26.56
 1 3 -3 1546.5 31.86
 -1 3 3 1459.56 32.12
 -1 3 3 1480.49 25.38
 -1 3 3 1487.47 31.73
 -1 3 3 1495 32.26
 1 3 -3 1447.8 26.48
 1 3 -2 1059.49 25.25
 -1 3 2 983.85 17.8
 -1 3 2 1011.02 23.86
 -1 3 2 996.23 23.31
 -1 3 2 946.07 18.47
 1 3 -2 1023.15 23.09
 1 3 -2 1031.39 25.36
 1 3 -2 987.66 19.43
 -1 3 2 941.09 21.52
 -1 3 2 980.6 24.71
 -1 3 2 967.03 18.36
 1 3 -1 197.35 8.9
 -1 3 1 188.6 7.9
 -1 3 1 190 7
 -1 3 1 192.07 9.44
 1 3 -1 200.03 7.94
 -1 3 1 196.81 8.49
 -1 3 1 187.48 6.98
 1 3 -1 190.01 9.47
 1 3 -1 190.01 6.83
 1 3 -1 175.63 9.14
 -1 3 1 187.54 6.7
 -1 3 1 189.99 5.83
 1 3 0 205.84 9.23
 -1 3 0 194.35 7.51
 -1 3 0 190.89 6.67
 1 3 0 199.57 7.23
 1 3 0 183.41 9.31
 -1 3 0 201.84 8.1
 -1 3 0 200.85 8.11
 -1 3 0 196.1 5.38
 1 3 0 185.87 9.35
 -1 3 0 195.72 9.49
 1 3 1 9.17 2.05
 -1 3 -1 10.06 2.35
 -1 3 -1 11.05 2.16
 1 3 1 13.17 1.61
 1 3 1 9.1 2.13
 1 3 1 9.96 2.19
 1 3 1 10.36 2.33
 1 3 2 556.82 17.72
 -1 3 -2 565.59 17.38
 -1 3 -2 573.28 17.56
 1 3 2 596.62 18.28
 1 3 2 582.23 18.34
 1 3 2 597.83 17.97
 1 3 3 389.44 14.91
 1 3 3 372.48 13.5
 1 3 3 351.85 13.47
 1 3 3 406.67 15.28
 -1 3 -3 376.97 14.4
 -1 3 -3 368.16 7.99
 1 3 3 356.42 9.09
 -1 3 -3 344.95 7.85
 -1 3 -3 382.81 13.71
 -1 3 -4 117.97 7.32
 1 3 4 108.82 8.06
 -1 3 -4 125.6 5
 1 3 4 123.8 5.84
 -1 3 -4 114.45 8.13
 1 3 4 135.17 8.96
 -1 3 -4 114.4 4.23
 1 3 4 123.53 7.63
 -1 3 -5 436.65 11.24
 1 3 5 447.63 17.95
 -1 3 -5 421.82 12.01
 -1 3 -5 405.77 16.97
 1 3 5 439.76 17.61
 -1 3 -5 439.27 14.99
 1 3 5 412.37 14.71
 1 3 5 413.41 13.48
 1 3 6 132.34 9.91
 -1 3 -6 130.98 7.81
 1 3 6 131.69 7.82
 1 3 6 126.35 9.8
 -1 3 -6 133 6.44
 -1 3 -6 134.07 9.82
 1 3 7 218.78 13.61
 -1 3 -7 203.19 9.14
 -1 3 -7 211.06 9.95
 1 3 7 225.37 13.69
 -1 3 -7 230.32 13.6
 1 3 8 44.66 6.66
 1 3 8 68.48 7.97
 -1 3 -8 48.58 4.64
 -1 3 -8 54.53 5.09
 -1 3 -8 54.37 7.03
 -1 3 -9 59.74 5.74
 1 3 9 53.4 7.35
 -1 3 -9 63.56 7.87
 1 3 9 60.53 7.91
 1 3 10 9.17 3.61
 -1 3 -10 9.99 3.79
 1 3 10 15.6 4.42
 1 3 11 1.56 2.47
 1 3 11 1.89 2.78
 -1 3 -11 3.8 2.91
 1 3 12 1.34 2.5
 -1 3 -12 5.13 2.84
 1 3 12 -1.07 2.46
 1 4 -12 6.82 2.93
 -1 4 11 11.29 4.24
 1 4 -11 13.21 4.67
 -1 4 11 14.14 4.79
 1 4 -10 13.51 4.26
 -1 4 10 15.26 4.84
 -1 4 10 21.29 4.91
 -1 4 9 4.56 2.53
 -1 4 9 17.09 4.86
 1 4 -9 11.26 3.74
 1 4 -8 43.64 5.28
 1 4 -8 44.85 6.4
 -1 4 8 47.06 6.72
 -1 4 8 50.68 4.99
 -1 4 8 40.46 6.23
 1 4 -8 30.63 4.08
 -1 4 8 41.6 5.17
 1 4 -7 97.57 7.83
 -1 4 7 96.18 8.96
 1 4 -7 76.45 7.75
 -1 4 7 82.84 7.19
 -1 4 7 90.33 8.79
 -1 4 7 91.09 6.06
 1 4 -7 88.9 6.21
 1 4 -6 24.14 3.03
 -1 4 6 25.14 4.06
 -1 4 6 23.25 4.45
 -1 4 6 23.26 2.82
 1 4 -6 31.37 4.52
 1 4 -6 25.07 4.29
 -1 4 6 25.8 4.55
 -1 4 5 236.1 12.35
 -1 4 5 251.76 8.43
 -1 4 5 232.09 12.72
 1 4 -5 196.2 11.43
 1 4 -5 244.42 8.81
 -1 4 5 225.13 12.71
 1 4 -5 227.34 12.1
 1 4 -5 227.28 8.51
 1 4 -4 3.86 1.05
 -1 4 4 5.97 2.42
 1 4 -4 3.62 2.04
 1 4 -4 3.75 1.03
 -1 4 4 4.54 0.99
 -1 4 4 4.4 2.14
 1 4 -4 4 2.03
 -1 4 4 4.1 1.84
 -1 4 3 209.68 10.75
 1 4 -3 200.77 10.17
 -1 4 3 198.26 11.14
 1 4 -3 202.08 11.32
 -1 4 3 202.81 10.88
 1 4 -3 209.85 7.11
 -1 4 3 193.57 5.56
 -1 4 3 191.06 5.51
 -1 4 2 124.82 8.82
 -1 4 2 108.41 3.79
 -1 4 2 126.54 7.79
 -1 4 2 129.21 8.16
 1 4 -2 119.2 5.32
 -1 4 2 112.84 5.2
 1 4 -2 120.67 7.37
 -1 4 2 129.35 6.87
 1 4 -2 133.59 9.12
 1 4 -1 597.23 19.05
 -1 4 1 590.3 15.72
 -1 4 1 622.37 20.72
 1 4 -1 621.22 20.91
 -1 4 1 633.39 16.38
 1 4 -1 611.15 17.11
 -1 4 1 607.22 18.94
 -1 4 1 626.1 18.09
 1 4 0 733.85 21.59
 -1 4 0 704.19 18.95
 1 4 0 730.04 17.96
 1 4 0 707.18 22.83
 -1 4 0 706.83 22.65
 -1 4 0 727.79 19.1
 -1 4 -1 111.42 7.15
 1 4 1 105.67 7.66
 -1 4 -1 97.43 7.83
 1 4 1 107.63 5.44
 1 4 1 105.81 8.2
 1 4 1 122.19 8.63
 -1 4 -2 1189.54 31.17
 1 4 2 1206.07 31.07
 1 4 2 1156.68 31.26
 -1 4 -2 1189.45 29.63
 1 4 2 1170.16 31.28
 -1 4 -3 8.28 2.68
 1 4 3 7.35 2.61
 1 4 3 6.41 2.66
 1 4 3 10.55 3.11
 -1 4 -3 9.06 2.74
 1 4 4 249.98 13.62
 -1 4 -4 259.93 13.37
 -1 4 -4 230.87 12.18
 1 4 4 223.16 12.13
 1 4 4 239.41 6.93
 1 4 4 253.34 13.63
 1 4 4 270.79 7.06
 -1 4 -5 26.31 4.06
 1 4 5 32.94 5.26
 1 4 5 19.83 3.64
 1 4 5 31.17 5
 -1 4 -5 27.37 2.3
 -1 4 -5 24.75 4.54
 -1 4 -6 58.75 6.08
 1 4 6 53.87 5.85
 -1 4 -6 62.64 4.24
 1 4 6 70.49 7.81
 1 4 6 56.52 7
 -1 4 -6 63.8 7.29
 1 4 7 1.53 1.41
 -1 4 -7 3.21 1.92
 1 4 7 1.12 2.16
 -1 4 -7 7.18 3.27
 1 4 7 2.92 2.19
 1 4 8 11.63 4.13
 -1 4 -8 12.37 3.82
 1 4 8 14.32 4.48
 1 4 9 5.83 3.4
 -1 4 -9 11.41 4.23
 1 4 9 11.98 4.12
 1 4 10 28.96 6.41
 1 4 10 17.31 5.23
 -1 4 -10 25.45 5.7
 1 4 11 4.76 3.64
 -1 4 -11 0.87 2.71
 1 4 11 -0.64 2.38
 -1 5 10 12.63 4.5
 1 5 -10 14.83 4.74
 1 5 -9 28.05 5.69
 -1 5 9 28.13 5.93
 -1 5 9 26.8 5.81
 -1 5 8 77.36 8.02
 1 5 -8 65.83 8.12
 -1 5 8 77.14 9.04
 1 5 -8 74.77 7.81
 -1 5 8 79.29 9.34
 1 5 -7 29.01 5.25
 1 5 -7 21.73 4.48
 -1 5 7 33.06 6.02
 -1 5 7 39.71 6.41
 -1 5 7 26.55 4.97
 -1 5 6 36.7 5.93
 1 5 -6 47.65 6.38
 -1 5 6 40.29 5.91
 1 5 -6 38.33 5.81
 -1 5 6 42.7 6.42
 -1 5 5 159.6 11.54
 1 5 -5 182.07 12.13
 -1 5 5 158.03 11.41
 1 5 -5 174.56 11.37
 -1 5 5 185.25 12.46
 -1 5 4 100.23 8.97
 1 5 -4 105.59 9.25
 -1 5 4 103.2 8.77
 -1 5 4 96.71 8.67
 1 5 -4 104.82 8.45
 -1 5 3 144.24 9.77
 1 5 -3 126.09 10.16
 1 5 -3 129.55 8.81
 -1 5 3 130.62 5.21
 -1 5 3 130.5 9.68
 -1 5 3 128.32 10.2
 1 5 -2 297.07 12.9
 -1 5 2 309.84 14.68
 -1 5 2 273.17 15.06
 -1 5 2 311.38 13.97
 1 5 -2 284.31 15.32
 -1 5 2 294.86 9.98
 -1 5 1 188.7 10.27
 1 5 -1 182.12 12.1
 -1 5 1 167.57 8.13
 -1 5 1 187.47 12.21
 1 5 -1 180.77 9.32
 -1 5 0 134.44 8.29
 1 5 0 134.16 9.52
 1 5 0 151.68 7.83
 1 5 0 136.19 10.49
 -1 5 0 142.77 8.13
 -1 5 0 133.12 10.24
 1 5 1 78.69 5.19
 1 5 1 86.2 7.79
 -1 5 -1 79.73 6.55
 1 5 1 81.59 8.16
 -1 5 -1 77.45 7.83
 -1 5 -2 94.96 7.66
 1 5 2 100.26 8.98
 1 5 2 98.31 8.79
 1 5 2 102.79 8.66
 -1 5 -2 101.14 8.96
 1 5 3 30.65 5.02
 1 5 3 32.47 5.24
 -1 5 -3 33.78 4.96
 1 5 3 29.2 5.06
 -1 5 -3 32.16 5.17
 1 5 4 163.46 12.03
 -1 5 -4 154.8 11.04
 1 5 4 183.27 12.46
 1 5 4 164.48 11.62
 -1 5 -4 165.3 11.5
 1 5 5 108.91 10.06
 -1 5 -5 108.18 9.31
 -1 5 -5 98.11 9.18
 1 5 5 107.96 10.09
 1 5 5 100.97 9.17
 1 5 6 55.11 6.76
 -1 5 -6 69.53 8.09
 1 5 6 65.71 8.16
 -1 5 -6 60.62 7.08
 1 5 6 67.8 8.36
 1 5 7 7.45 2.98
 -1 5 -7 9.39 3.11
 -1 5 -7 22.62 5.19
 1 5 7 24.38 5.19
 1 5 7 19.52 5.12
 1 5 8 20.03 5.49
 -1 5 -8 27.51 5.81
 1 5 8 14.45 4.51
 1 5 9 12.53 4.5
 1 5 9 16.07 5.14
 -1 5 -9 17.65 4.99
 -1 6 9 20.23 5.81
 -1 6 9 20.67 5.8
 1 6 -9 22.8 5.52
 -1 6 8 28.46 6.06
 1 6 -8 31.23 6.32
 -1 6 8 34.14 6.56
 1 6 -8 33.62 5.91
 -1 6 8 34.53 6.77
 1 6 -7 46.11 6.81
 -1 6 7 64.78 8.54
 -1 6 7 68.28 8.38
 1 6 -7 56.65 7.66
 -1 6 7 60.65 8.4
 -1 6 6 20.36 4.93
 1 6 -6 15.52 4.21
 -1 6 6 21.21 4.95
 1 6 -6 15.05 4.04
 -1 6 6 17.55 4.51
 -1 6 5 61.79 7.81
 1 6 -5 55.04 7.46
 -1 6 5 56.59 7.5
 1 6 -5 48.35 6.4
 -1 6 5 60.73 7.91
 -1 6 4 21.57 4.94
 -1 6 4 9.94 3.51
 -1 6 4 18.86 4.55
 1 6 -4 23.46 4.54
 1 6 -4 26.16 5.45
 -1 6 3 51.48 7.32
 -1 6 3 56.33 7.09
 1 6 -3 35.27 6.35
 1 6 -3 47.08 5.85
 -1 6 3 38.65 5.68
 1 6 -2 40.22 5.14
 -1 6 2 34.13 6.13
 -1 6 2 40.14 5.52
 1 6 -2 39.42 6.57
 1 6 -1 87.04 6.97
 1 6 -1 89.92 9.54
 -1 6 1 95.01 8.06
 -1 6 1 87.89 6.28
 -1 6 1 91.47 9.6
 1 6 0 97.87 9.93
 -1 6 0 112.13 8.42
 1 6 0 86.1 8.34
 1 6 0 100.83 7.01
 -1 6 0 112.25 7.76
 -1 6 0 100.07 9.92
 1 6 1 15.47 2.73
 1 6 1 15.39 3.64
 1 6 1 12.78 4.53
 -1 6 -1 9.59 2.72
 -1 6 -1 9.92 3.6
 1 6 2 57.41 7.89
 1 6 2 75.8 8.24
 -1 6 -2 60.43 6.51
 -1 6 -2 53.96 7.61
 1 6 3 127.6 11.49
 -1 6 -3 132.3 10.24
 -1 6 -3 154.71 12.41
 1 6 3 154.58 11.96
 1 6 3 135.73 11.8
 1 6 4 48.71 7.21
 -1 6 -4 52.71 6.75
 -1 6 -4 46.6 6.91
 1 6 4 40.95 6.61
 1 6 4 47.97 7.25
 1 6 5 73.85 8.98
 -1 6 -5 67.58 8.06
 1 6 5 76.45 8.78
 1 6 5 77.69 9.25
 -1 6 -5 71.43 8.53
 1 6 6 24.4 5.59
 -1 6 -6 15.09 4.27
 1 6 6 16.63 4.7
 1 6 6 14.42 4.26
 -1 6 -6 14.7 4.15
 1 6 7 7.63 3.33
 -1 6 -7 -1.15 2.12
 -1 6 -7 1.12 2.59
 1 6 7 6.29 3.74
 1 6 7 1.43 2.29
 1 6 8 19.32 5.4
 1 6 8 20.69 5.56
 -1 6 -8 3.94 3.42
 1 7 -8 13.44 4.43
 1 7 -7 3.31 2.85
 -1 7 7 6.61 3.86
 -1 7 7 3.82 2.77
 -1 7 7 -4.1 3.46
 1 7 -6 1.54 2.13
 -1 7 6 8.41 3.98
 -1 7 6 9.37 3.92
 -1 7 6 12.02 4.51
 1 7 -6 5.44 3.33
 -1 7 5 13.29 4.23
 -1 7 5 9.15 4.19
 -1 7 5 9.09 3.81
 1 7 -5 10.4 4.1
 1 7 -5 4.23 2.84
 1 7 -4 16.17 4.07
 -1 7 4 7.18 3.92
 -1 7 4 14.23 4.4
 -1 7 4 3.04 2.67
 1 7 -4 0.13 2.28
 1 7 -3 19.5 4.04
 1 7 -3 25.86 6.05
 -1 7 3 18.59 4.4
 -1 7 3 34.13 6.8
 1 7 -2 131.21 12.58
 -1 7 2 119.21 10.34
 -1 7 2 126.79 12.42
 1 7 -2 124.22 9.39
 -1 7 1 16.4 3.9
 -1 7 1 19.05 5.32
 1 7 -1 24.05 6.12
 -1 7 0 26.38 5.98
 1 7 0 43.41 7.53
 -1 7 -1 36 5.02
 1 7 1 27.87 6.14
 1 7 1 32.43 5.78
 -1 7 -1 23.93 5.69
 -1 7 -2 32.04 6.31
 1 7 2 19.44 5.49
 -1 7 -2 32.64 5.2
 1 7 2 25.28 5.34
 1 7 3 50 7.59
 -1 7 -3 56.1 6.98
 -1 7 -3 42.31 7.26
 1 7 3 52.42 8.26
 1 7 4 67.52 9.22
 -1 7 -4 65.55 7.88
 -1 7 -4 74.32 9.62
 1 7 4 68.47 9.04
 -1 7 -5 46.42 7.96
 -1 7 -5 57.73 7.77
 1 7 5 54.53 8.79
 1 7 5 41.91 7.54
 1 7 5 52.84 8.17
 -1 7 -6 22.95 5.65
 1 7 6 12.3 4.55
 1 7 6 17.67 4.98
 -1 7 -6 17.24 4.84
 -1 7 -7 21.19 5.4
 1 8 -5 5.79 3.11
 -1 8 5 4.69 3.1
 -1 8 4 14.42 4.6
 1 8 2 9.37 4.22
 1 8 3 4.83 3.29
 -1 8 -4 1.91 2.43
 -2 -8 5 11.67 4.25
 -2 -8 3 11.53 4.56
 -2 -8 2 44.85 7.69
 -2 -8 1 23.02 5.85
 -2 -8 0 80.49 10.23
 -2 -8 -1 51.22 8.4
 -2 -8 -2 25.24 6.16
 2 -8 4 5.16 3.48
 -2 -7 7 26.57 6.2
 -2 -7 6 53.89 8.49
 2 -7 -6 62.85 9.34
 -2 -7 5 13.9 4.38
 -2 -7 5 11.38 3.9
 2 -7 -5 13.1 4.67
 2 -7 -4 20.93 5.55
 -2 -7 4 27.03 5.49
 -2 -7 4 33.71 6.56
 2 -7 -3 5.74 2.52
 -2 -7 3 6.72 3.19
 -2 -7 2 4.16 2.64
 -2 -7 2 2.73 2.36
 2 -7 -2 5.83 3.26
 -2 -7 1 5.89 3.11
 2 -7 -1 9.1 4.12
 -2 -7 0 2.85 2.52
 2 -7 0 5.7 3.15
 2 -7 1 9.97 3.88
 2 -7 1 4.93 2.46
 -2 -7 -1 6.84 3.67
 2 -7 2 15.2 4.67
 -2 -7 -2 21.42 5.37
 2 -7 2 17.48 4.42
 2 -7 3 16.94 5.36
 2 -7 3 13.23 4.3
 -2 -7 -3 13.37 4.42
 2 -7 4 14.27 4.38
 2 -7 4 10.16 4.66
 -2 -7 -4 15.83 4.74
 2 -7 5 52.48 8.33
 2 -7 5 33.87 6.7
 -2 -7 -5 30.1 6.67
 2 -7 6 1.73 3.24
 2 -7 6 1.53 2.38
 -2 -7 -6 8.61 2.94
 -2 -7 -7 29.41 6.4
 2 -6 -10 0.88 2.38
 -2 -6 9 4.46 3.5
 2 -6 -9 1.26 1.9
 2 -6 -9 1.4 2.76
 2 -6 -8 2.38 2.18
 2 -6 -8 5.27 2.54
 -2 -6 8 7.09 3.94
 -2 -6 7 11.65 3.36
 -2 -6 7 17.05 5.05
 2 -6 -7 13.15 3.55
 2 -6 -7 13.66 4.75
 2 -6 -6 25.87 5.55
 -2 -6 6 24.31 4.66
 -2 -6 6 14.6 4.56
 2 -6 -6 21.3 4.06
 -2 -6 5 55.85 6.93
 -2 -6 5 46.88 7.04
 2 -6 -5 59.94 8.26
 2 -6 -5 45.48 5.5
 2 -6 -4 48.2 5.19
 -2 -6 4 37.68 5.82
 -2 -6 4 32.77 5.74
 2 -6 -4 45.08 7.01
 2 -6 -3 72.95 8.69
 -2 -6 3 61.88 7.24
 -2 -6 3 60.31 7.24
 -2 -6 2 11.64 3.45
 2 -6 -2 7.63 3.41
 -2 -6 2 14.87 3.73
 2 -6 -1 76.13 6.54
 -2 -6 1 84.14 8.46
 2 -6 -1 86.57 9.5
 -2 -6 1 95.74 8.17
 -2 -6 0 76.42 6.85
 -2 -6 0 86.34 6.66
 2 -6 0 78.94 9.19
 -2 -6 0 78.82 8.33
 -2 -6 0 83.35 6.58
 2 -6 0 89.17 7.61
 2 -6 1 25.1 5.64
 -2 -6 -1 28.21 4.27
 -2 -6 -1 31.34 4.45
 2 -6 1 27.67 4.62
 -2 -6 -1 33.49 5.6
 -2 -6 -2 147.61 11.97
 2 -6 2 161.97 13.22
 2 -6 2 150.31 11.22
 -2 -6 -2 155.78 10.38
 2 -6 3 9.34 3.43
 2 -6 3 5.54 2.99
 -2 -6 -3 3.78 2.66
 -2 -6 -3 2.08 2.11
 2 -6 4 66.15 8.63
 2 -6 4 67.86 8.54
 -2 -6 -4 62.81 7.42
 2 -6 5 28.24 5.8
 -2 -6 -5 31.21 5.6
 2 -6 5 20.89 5.19
 -2 -6 -6 0.82 2.03
 2 -6 6 5.08 3.03
 2 -6 6 1.34 2.14
 2 -6 7 14.09 4.71
 2 -6 7 5.83 3.66
 -2 -6 -7 15.98 4.73
 -2 -6 -8 7.67 4.05
 2 -6 8 9.07 3.83
 2 -5 -11 1.85 2.24
 2 -5 -10 32.9 6.26
 -2 -5 10 17.18 5.16
 -2 -5 9 12.32 5.05
 2 -5 -9 11.13 3.72
 -2 -5 8 20.55 5.34
 -2 -5 8 28.52 4.65
 2 -5 -8 26.45 5.02
 -2 -5 7 18.39 3.87
 2 -5 -7 24.71 4.6
 2 -5 -7 26.78 5.73
 -2 -5 7 25.1 5.62
 2 -5 -6 363.26 16.25
 2 -5 -6 329.97 18.07
 -2 -5 6 346.24 15.83
 -2 -5 6 355.61 18.88
 -2 -5 5 201.81 11.82
 -2 -5 5 189.23 13.07
 2 -5 -5 227.65 11.83
 -2 -5 5 190.78 8.23
 2 -5 -5 191.93 13.35
 2 -5 -4 270.06 15.48
 -2 -5 4 274.62 13.79
 -2 -5 4 249.92 14.3
 -2 -5 4 254 10.46
 2 -5 -4 263.73 11.99
 -2 -5 4 255.4 9.59
 -2 -5 3 424.42 13.2
 -2 -5 3 415.47 12.41
 2 -5 -3 438.71 19.73
 -2 -5 3 433.62 18.15
 -2 -5 3 436 17.62
 2 -5 -3 414.43 11.78
 -2 -5 3 415.6 12.43
 2 -5 -3 426.32 14.38
 -2 -5 2 9.78 2.07
 2 -5 -2 6.45 1.72
 -2 -5 2 12.83 1.64
 2 -5 -2 11.97 2.14
 -2 -5 2 8.65 1.95
 -2 -5 2 11.6 3.13
 -2 -5 2 11.53 2.87
 2 -5 -2 9.5 3.36
 -2 -5 1 343.79 15.39
 -2 -5 1 313.9 13.73
 2 -5 -1 309.01 7.65
 2 -5 -1 348.99 17.21
 2 -5 -1 313.5 12.54
 -2 -5 1 330.44 12.36
 -2 -5 1 322.75 12.14
 -2 -5 0 98.18 8.24
 -2 -5 0 92.39 6.68
 -2 -5 0 94.56 6.75
 -2 -5 0 95.4 6.85
 2 -5 0 83.24 8.42
 2 -5 0 89.77 7.04
 -2 -5 -1 126.52 8.34
 2 -5 1 129.26 9.01
 2 -5 1 121.24 10.27
 -2 -5 -1 130.96 9.75
 -2 -5 -1 108.95 6.89
 -2 -5 -2 108.07 8.36
 2 -5 2 99.38 8.48
 -2 -5 -2 107.97 6.3
 2 -5 2 117.53 10.22
 2 -5 3 3.7 2.42
 2 -5 3 6.76 2.88
 -2 -5 -3 0.21 1.78
 2 -5 4 40.02 6.28
 -2 -5 -4 40.79 5.88
 2 -5 4 36.35 5.89
 2 -5 5 185.33 13.31
 2 -5 5 153.86 12.43
 -2 -5 -5 187.72 12.94
 2 -5 6 8.97 3.66
 -2 -5 -6 12.1 3.63
 2 -5 6 6 3.09
 -2 -5 -7 93.85 10.02
 2 -5 7 98.86 10.76
 2 -5 7 115.41 10.91
 -2 -5 -8 2.13 2.8
 2 -5 8 1.74 2.52
 2 -5 8 2.96 3.25
 2 -5 9 2.69 3.27
 2 -5 9 -1.86 2.37
 -2 -5 -9 -1.21 2.36
 2 -5 10 7.36 3.48
 -2 -4 12 1.36 2.62
 2 -4 -12 7.06 3.52
 2 -4 -11 63.46 8.59
 -2 -4 11 59.4 8.94
 -2 -4 10 25.36 4.33
 -2 -4 10 23.73 5.65
 2 -4 -10 31.22 5.86
 -2 -4 9 4.3 1.94
 2 -4 -9 3.21 2.48
 -2 -4 9 2.42 2.55
 -2 -4 8 34.15 4.55
 -2 -4 8 30.32 5.79
 2 -4 -8 37.84 5.56
 -2 -4 7 19.61 3.4
 -2 -4 7 18 4.47
 2 -4 -7 25.74 4.42
 2 -4 -6 80.73 7.15
 -2 -4 6 88.16 8.56
 -2 -4 6 81.83 6.54
 -2 -4 6 72.04 5.39
 -2 -4 5 12.33 2.85
 2 -4 -5 18.28 3.24
 -2 -4 5 11.99 1.91
 -2 -4 5 10.04 3.23
 -2 -4 5 11.57 2.14
 2 -4 -5 16.09 3.81
 -2 -4 4 9.08 2.42
 -2 -4 4 15.74 2.11
 2 -4 -4 16 2.8
 -2 -4 4 17.23 3.57
 -2 -4 4 18.25 2.51
 2 -4 -4 19.72 3.82
 -2 -4 3 107.99 7.3
 2 -4 -3 99.19 6.15
 -2 -4 3 99.25 7.69
 2 -4 -3 106.79 8.4
 -2 -4 3 103.43 5.97
 2 -4 -3 108.27 4.77
 2 -4 -3 97.53 5.74
 -2 -4 3 110.04 5.74
 -2 -4 3 114.61 6.17
 -2 -4 2 240.7 11.38
 2 -4 -2 226.07 8
 2 -4 -2 238.13 7.92
 2 -4 -2 229.99 8.78
 2 -4 -2 230.54 8.65
 2 -4 -2 253.44 12.91
 -2 -4 2 228.54 9.31
 -2 -4 2 255.49 11.34
 -2 -4 2 241.87 7.74
 -2 -4 2 246.12 9.58
 2 -4 -1 184.98 10.99
 2 -4 -1 185.26 6.66
 2 -4 -1 193.64 7.48
 -2 -4 1 195.65 9.55
 2 -4 -1 187.33 8.56
 -2 -4 1 187.7 8.63
 -2 -4 1 177.71 5.29
 2 -4 -1 188 5.78
 -2 -4 1 198.89 8.81
 -2 -4 1 201.33 10.17
 -2 -4 0 1055.56 25.55
 2 -4 0 1011.94 22.66
 2 -4 0 1052.74 25.83
 -2 -4 0 1107.09 27.92
 2 -4 0 1058.4 29.86
 -2 -4 0 1001.98 24.48
 -2 -4 0 1079.17 25.55
 2 -4 0 1054.33 23.18
 -2 -4 -1 755.96 19.02
 2 -4 1 800.65 25.63
 2 -4 1 794.82 17.91
 2 -4 1 801.21 23.12
 -2 -4 -1 821.93 19.82
 -2 -4 -1 832.83 22.91
 -2 -4 -2 852.11 24.84
 2 -4 2 863.9 18.48
 -2 -4 -2 840.03 19.28
 2 -4 2 911.87 25.98
 2 -4 2 918.01 27.87
 2 -4 3 98.23 8.56
 -2 -4 -3 84.58 4.47
 2 -4 3 97.44 8.15
 -2 -4 -3 86.98 7.63
 2 -4 3 87.89 4.56
 2 -4 4 380.16 17.69
 -2 -4 -4 419.35 18.05
 2 -4 4 416.74 18.29
 2 -4 5 27.22 4.76
 2 -4 5 25.77 4.92
 -2 -4 -5 19.15 4.32
 2 -4 6 18.11 4.55
 -2 -4 -6 16.51 4
 2 -4 6 15.5 3.95
 2 -4 7 26.27 5.13
 2 -4 7 26.68 5.38
 -2 -4 -7 23.61 5.12
 2 -4 8 27.64 5.31
 2 -4 8 33.39 6.46
 -2 -4 -8 26.51 5.72
 2 -4 9 4.22 2.41
 -2 -4 -9 9.04 3.92
 2 -4 9 5 3.53
 2 -4 10 8.37 4.08
 2 -4 10 4.97 2.88
 -2 -4 -10 2.99 3.19
 -2 -3 13 -0.52 3.01
 2 -3 -12 -2.5 2.79
 -2 -3 12 1.58 2.62
 2 -3 -11 10.34 3.62
 -2 -3 11 5.49 3.31
 -2 -3 10 36.21 6.38
 2 -3 -10 36.72 6.02
 2 -3 -9 72.97 7.98
 -2 -3 9 85.82 6.91
 -2 -3 9 79.47 8.9
 -2 -3 8 65.33 7.64
 -2 -3 8 66.48 5.72
 2 -3 -8 67.42 7.2
 -2 -3 7 12.44 2.48
 2 -3 -7 14.37 3.23
 -2 -3 7 17.98 4.13
 2 -3 -6 239.12 11.94
 -2 -3 6 227.83 12.84
 -2 -3 6 238 10.15
 -2 -3 6 249.67 10.2
 -2 -3 5 709.73 17.79
 2 -3 -5 737.34 21.29
 -2 -3 5 756.74 23.61
 -2 -3 5 764.54 19.19
 -2 -3 5 758.85 19.42
 -2 -3 4 53.58 3.86
 2 -3 -4 70.05 5.38
 -2 -3 4 53.7 4.45
 2 -3 -4 51.3 5.4
 -2 -3 4 56.4 4.26
 -2 -3 4 48.94 5.3
 -2 -3 3 2365.41 42.99
 -2 -3 3 2459.72 43.04
 -2 -3 3 2414.76 44.01
 2 -3 -3 2252.77 40.61
 2 -3 -3 2425.23 48.01
 2 -3 -3 2349.65 42.73
 -2 -3 3 2386.41 47.21
 2 -3 -3 2423.72 43.71
 -2 -3 2 221.9 8.99
 2 -3 -2 224.25 7.71
 2 -3 -2 235.16 9.3
 -2 -3 2 220.23 8.64
 -2 -3 2 233.35 7.46
 2 -3 -2 226.01 10.73
 2 -3 -2 230.59 8.22
 -2 -3 2 232.22 8.8
 2 -3 -2 227.53 7.53
 2 -3 -2 229.34 7.69
 -2 -3 2 210.51 9.58
 2 -3 -1 1062.41 22.92
 -2 -3 1 1081.91 19.51
 -2 -3 1 1076.41 24.38
 2 -3 -1 1066.84 21.88
 2 -3 -1 1050.36 19.46
 2 -3 -1 1093.72 27.07
 2 -3 -1 1047.9 21.83
 2 -3 -1 1063.28 22.87
 -2 -3 1 1047.04 23.44
 -2 -3 1 1084.74 23.65
 -2 -3 0 1027.12 24.36
 2 -3 0 998.78 19.69
 2 -3 0 1031.21 22.06
 2 -3 0 1020.44 21.28
 -2 -3 0 1006.27 17.35
 2 -3 0 1024.5 23.58
 2 -3 0 1030.15 26.62
 -2 -3 0 990.75 21.77
 -2 -3 0 995.88 23.51
 2 -3 1 3.99 2.14
 2 -3 1 3.72 1.52
 -2 -3 -1 6.78 0.89
 -2 -3 -1 3.72 1.02
 2 -3 1 5.23 0.92
 2 -3 1 1.68 0.92
 2 -3 1 6.05 1.25
 -2 -3 -1 2.92 1.55
 2 -3 2 262.75 6.87
 2 -3 2 239.73 11.98
 -2 -3 -2 271.1 11.94
 2 -3 2 256.42 8.7
 2 -3 2 243.85 11.43
 -2 -3 -2 243.35 7.94
 2 -3 3 5.2 2.3
 2 -3 3 2.96 0.76
 2 -3 3 2.44 0.8
 2 -3 3 1.4 1.29
 -2 -3 -3 1.5 0.78
 -2 -3 -3 4.2 1.98
 -2 -3 -4 200.19 11.62
 2 -3 4 196.09 6.76
 -2 -3 -4 200.74 7.23
 2 -3 4 193.54 11.43
 2 -3 4 209.43 11.52
 2 -3 5 189.27 11.98
 2 -3 5 215.63 12.03
 -2 -3 -5 192.19 7.42
 -2 -3 -5 217.45 12.66
 -2 -3 -6 130.68 10.44
 2 -3 6 139.56 10.04
 -2 -3 -6 119.97 5.87
 2 -3 6 129.05 10.5
 2 -3 7 83.02 8.85
 2 -3 7 98.11 8.76
 -2 -3 -7 79.06 8.58
 -2 -3 -8 52.6 7.48
 2 -3 8 66.95 8.49
 2 -3 8 77.24 8.21
 2 -3 9 57.72 7.55
 2 -3 9 57.85 8.3
 -2 -3 -9 50.97 7.78
 -2 -3 -10 64.48 8.99
 2 -3 10 45.52 7.66
 2 -3 11 14.73 4.87
 -2 -3 -11 16.58 5.46
 -2 -2 14 6.14 4.06
 -2 -2 13 14.35 4.27
 2 -2 -13 5.92 2.8
 -2 -2 12 11.26 4.28
 2 -2 -12 9.94 4.14
 -2 -2 11 38.69 6.3
 2 -2 -11 35.71 6.18
 2 -2 -10 123.78 10.59
 -2 -2 10 117.67 10.59
 2 -2 -9 5.91 3.31
 2 -2 -9 7.21 1.58
 -2 -2 9 9.29 3.6
 2 -2 -8 363.85 16.26
 2 -2 -8 325.22 10.89
 -2 -2 8 329.83 11.19
 -2 -2 8 346.87 16.49
 -2 -2 8 347.73 10.87
 -2 -2 7 188.38 8.39
 2 -2 -7 203.02 11.25
 -2 -2 7 219.27 8.61
 -2 -2 7 215.04 12.05
 -2 -2 7 221.73 9.27
 2 -2 -6 273.77 9.5
 2 -2 -6 272.99 12.26
 -2 -2 6 254.14 10.06
 -2 -2 6 273.62 9.66
 -2 -2 6 284.22 13.08
 -2 -2 6 298.28 10.43
 -2 -2 6 259.75 10.87
 -2 -2 5 1276.14 27.33
 -2 -2 5 1306.89 28.25
 -2 -2 5 1324.88 31.28
 2 -2 -5 1319.27 26.53
 -2 -2 5 1295.69 25.59
 -2 -2 5 1334.76 28.12
 2 -2 -5 1365 30.3
 -2 -2 5 1318.2 28.12
 2 -2 -4 696.13 18.09
 -2 -2 4 648.01 18.75
 -2 -2 4 654.31 14.68
 -2 -2 4 611.16 17.13
 -2 -2 4 627.3 14.43
 -2 -2 4 634.05 17.09
 -2 -2 4 639.46 16.34
 -2 -2 4 644.38 15.91
 -2 -2 3 2420.25 45.41
 -2 -2 3 2552.98 46.03
 -2 -2 3 2417.11 41.63
 2 -2 -3 2431.27 43.54
 -2 -2 3 2435.22 43.11
 -2 -2 3 2496.55 45.23
 2 -2 -3 2355.29 42.87
 2 -2 -3 2510.56 42.01
 -2 -2 3 2435.62 43.47
 2 -2 -3 2487.51 45.36
 -2 -2 3 2453.91 41.2
 -2 -2 2 422.43 10.74
 2 -2 -2 418.49 11.05
 -2 -2 2 441.98 13.71
 -2 -2 2 424.19 12.42
 -2 -2 2 416.18 13.22
 2 -2 -2 408.87 10.84
 -2 -2 2 440.45 12.11
 2 -2 -2 415.63 11.32
 -2 -2 2 404.18 11.85
 -2 -2 2 427.89 10.75
 -2 -2 2 414.05 11.49
 2 -2 -2 451.99 13.48
 -2 -2 2 438.97 13.48
 2 -2 -1 450.07 10.83
 2 -2 -1 445.31 11.6
 -2 -2 1 460.14 14.06
 -2 -2 1 444.53 12.41
 -2 -2 1 440.04 11.98
 -2 -2 1 446.82 10.25
 2 -2 -1 438.72 10.18
 2 -2 -1 467.53 13.81
 2 -2 -1 463.95 11.62
 -2 -2 1 426.03 13.42
 -2 -2 1 453.8 13.68
 -2 -2 1 438 12.27
 2 -2 -1 446.35 10.12
 -2 -2 1 441.87 12.35
 -2 -2 0 980.24 22.87
 -2 -2 0 955.85 22.43
 -2 -2 0 944.04 22.39
 2 -2 0 982.42 16.67
 -2 -2 0 939.44 19.52
 2 -2 0 970.95 20.64
 -2 -2 0 999.66 21.81
 2 -2 0 927.87 17.55
 -2 -2 0 960.38 21.29
 -2 -2 0 996.05 17.68
 2 -2 0 989.26 21.26
 2 -2 0 930.74 22.71
 2 -2 0 946.61 16.67
 -2 -2 0 986.15 22.9
 -2 -2 -1 61.26 3.28
 2 -2 1 60.83 2.82
 2 -2 1 65.04 4.6
 -2 -2 -1 65.09 4.7
 2 -2 1 56.68 4.9
 -2 -2 -1 66.11 4.84
 -2 -2 -1 64.18 5.03
 -2 -2 -1 68.33 4.97
 2 -2 1 63.74 4.67
 2 -2 2 2798.98 43.66
 2 -2 2 2973.24 53.74
 -2 -2 -2 2874.67 51.27
 -2 -2 -2 2975.79 52.04
 -2 -2 -2 2926.82 48.5
 2 -2 2 3000.36 53.53
 -2 -2 -2 2976 53.93
 -2 -2 -3 163.16 6.53
 -2 -2 -3 173.34 9.61
 2 -2 3 155.11 6.5
 -2 -2 -3 171.75 8.02
 2 -2 3 177.45 9.31
 -2 -2 -3 158.78 7.57
 2 -2 3 183.78 9.25
 2 -2 4 1160.32 24.67
 2 -2 4 1199.09 30.31
 -2 -2 -4 1180.79 24.19
 -2 -2 -4 1165.38 25.46
 -2 -2 -4 1162.16 25.88
 -2 -2 -4 1155.41 30.14
 2 -2 4 1218.47 29.48
 2 -2 5 36.54 4.64
 2 -2 5 33.53 4.77
 -2 -2 -5 34.02 3.33
 -2 -2 -5 33.33 3.27
 -2 -2 -5 32.87 4.68
 -2 -2 -5 34.09 3.29
 -2 -2 -5 27.31 3.09
 2 -2 6 86.62 5.27
 2 -2 6 98.99 8.47
 -2 -2 -6 103.3 5.57
 -2 -2 -6 96.79 5.93
 -2 -2 -6 90.89 5.5
 2 -2 6 92.58 5.81
 2 -2 6 87.02 7.47
 -2 -2 -6 80.7 7.78
 2 -2 7 10.01 3
 2 -2 7 7.62 2.06
 -2 -2 -7 7.33 1.89
 2 -2 7 5.36 2.64
 -2 -2 -7 4.01 2.63
 2 -2 8 19.17 4.19
 -2 -2 -8 26.81 5.3
 -2 -2 -8 20.46 3.28
 2 -2 8 15.52 3.08
 2 -2 8 25.99 5.07
 -2 -2 -9 78.7 9.04
 2 -2 9 67.86 6.56
 2 -2 9 79.84 8.94
 2 -2 10 4.52 2.98
 -2 -2 -10 13.45 4.28
 2 -2 11 12.08 4.28
 -2 -2 -11 10.54 4.55
 2 -2 12 4.48 2.82
 -2 -1 14 0.78 2.51
 -2 -1 14 4.98 3.73
 2 -1 -14 1.72 2.8
 -2 -1 13 21.81 5.36
 2 -1 -13 26.89 6.01
 2 -1 -12 3.52 2.7
 -2 -1 12 9.15 3.36
 -2 -1 11 -1.47 2.16
 2 -1 -11 1.45 1.38
 2 -1 -11 3.82 2.92
 2 -1 -10 25.52 3.39
 2 -1 -10 31.18 5.43
 -2 -1 10 26.84 4.87
 2 -1 -9 211.23 9.19
 2 -1 -9 211.91 12.55
 -2 -1 9 201.65 12.16
 2 -1 -9 203.69 5.55
 -2 -1 8 302.78 8.43
 2 -1 -8 333.04 14.91
 2 -1 -8 319.17 10.88
 -2 -1 8 315.33 14.56
 2 -1 -7 100.91 5.35
 2 -1 -7 106.06 7.75
 -2 -1 7 100.83 4.81
 2 -1 -7 107.4 4.43
 -2 -1 7 106.92 7.78
 2 -1 -6 1014.32 25.7
 -2 -1 6 959.71 20.33
 2 -1 -6 984.67 18.73
 -2 -1 6 1001 25.41
 -2 -1 6 993.2 24.78
 2 -1 -6 1033.52 20.54
 2 -1 -5 580.15 12.79
 -2 -1 5 563.77 15.71
 -2 -1 5 575.07 16.78
 2 -1 -5 546.33 16.4
 -2 -1 5 551.85 13.7
 -2 -1 5 503.5 9.56
 2 -1 -5 565.39 11.95
 -2 -1 5 614.35 13.44
 -2 -1 5 600.91 16.25
 2 -1 -4 660.76 17.2
 -2 -1 4 659.13 17.05
 -2 -1 4 635.94 11.75
 -2 -1 4 642.09 16.16
 -2 -1 4 622.04 15.28
 -2 -1 4 688.36 15.01
 -2 -1 4 701.19 16.98
 -2 -1 4 686.44 17.43
 2 -1 -4 674.21 17.15
 -2 -1 4 672.62 13.11
 -2 -1 3 8231.27 124.75
 -2 -1 3 8721.42 123.64
 -2 -1 3 7643.93 123.7
 -2 -1 3 8360.44 124.52
 -2 -1 3 8090.78 124.47
 2 -1 -3 7922.44 124.39
 2 -1 -3 8346.88 123.86
 -2 -1 3 8155.55 119.92
 -2 -1 3 7982.93 124.06
 2 -1 -3 7878.43 124.65
 -2 -1 2 1003 21.09
 2 -1 -2 1023.84 20.55
 -2 -1 2 1062.45 20.91
 2 -1 -2 1001.38 20.3
 -2 -1 2 1043.01 18.84
 2 -1 -2 1060.82 20.86
 -2 -1 2 1095.21 21.11
 -2 -1 2 1062.33 20.33
 2 -1 -2 1023.9 20.36
 -2 -1 2 1074.99 21.35
 -2 -1 1 3714.49 58
 -2 -1 1 3747.5 60.39
 -2 -1 1 3703.25 57.97
 2 -1 -1 3541.92 57.76
 -2 -1 1 3751.95 58.91
 2 -1 -1 3782.19 59.23
 -2 -1 1 3793.3 59.76
 -2 -1 1 3667.01 59.46
 2 -1 -1 3673.81 59.44
 2 -1 -1 3587.11 57.84
 -2 -1 1 3783.23 59.93
 2 -1 0 10.37 1.76
 2 -1 0 11.18 1.23
 2 -1 0 5.35 1.13
 -2 -1 0 8.04 1.43
 2 -1 0 7.44 1.28
 -2 -1 0 5.68 1.18
 -2 -1 0 6.64 1.14
 -2 -1 0 7.36 1.26
 -2 -1 0 6.37 1.24
 -2 -1 0 6.39 1.04
 -2 -1 -1 32.28 2.54
 -2 -1 -1 26.02 2.87
 -2 -1 -1 27.34 2.39
 -2 -1 -1 29.31 2.92
 -2 -1 -1 28.73 2.76
 -2 -1 -1 26.54 2.53
 2 -1 1 25.2 2.11
 2 -1 1 24.86 2.57
 2 -1 1 31.05 2.91
 2 -1 1 24.94 2.64
 -2 -1 -1 25.96 2.44
 2 -1 2 531.6 10.47
 2 -1 2 525.62 14.62
 -2 -1 -2 535.62 14.42
 -2 -1 -2 520.82 15.54
 -2 -1 -2 549.48 14.22
 2 -1 2 501.13 15.03
 -2 -1 -2 546.21 12.86
 -2 -1 -2 544.8 13.61
 -2 -1 -2 529.33 13.79
 -2 -1 -2 540.9 14.35
 2 -1 2 547.88 15.06
 -2 -1 -2 532.03 15.87
 2 -1 2 527.02 13.48
 -2 -1 -2 512.95 12.87
 -2 -1 -3 93.75 5.74
 -2 -1 -3 85.03 4.62
 2 -1 3 82.54 5.56
 2 -1 3 82.29 5.07
 2 -1 3 84.38 4.01
 -2 -1 -3 88.18 4.36
 -2 -1 -3 89.18 4.98
 2 -1 3 84.33 5.75
 -2 -1 -3 86.84 6.13
 -2 -1 -4 641.27 15.04
 2 -1 4 638.37 17.54
 2 -1 4 600.68 18.57
 2 -1 4 625.84 15.18
 -2 -1 -4 616.61 16.46
 -2 -1 -4 623.27 19.34
 2 -1 4 626.31 18.34
 2 -1 5 326.08 13.55
 -2 -1 -5 300.43 9.17
 2 -1 5 313.17 10.89
 -2 -1 -5 314.46 11.55
 2 -1 5 325.09 13.27
 -2 -1 -5 292.13 13.64
 2 -1 6 29.25 3.56
 -2 -1 -6 25.6 4.31
 -2 -1 -6 27.51 2.38
 -2 -1 -6 30.53 3.74
 -2 -1 -7 205.23 10.33
 2 -1 7 206.75 5.52
 -2 -1 -7 187.16 5.8
 2 -1 7 200.79 10.18
 2 -1 7 220.64 9.8
 2 -1 7 208.78 12.15
 -2 -1 -7 217.73 12.89
 2 -1 8 209.79 10.07
 -2 -1 -8 219.56 13.58
 2 -1 8 200.19 11.07
 -2 -1 -8 202.16 10.97
 2 -1 8 205.23 12.68
 -2 -1 -9 131.61 11.09
 2 -1 9 122.11 7.86
 2 -1 9 117.39 9.23
 -2 -1 -9 113.07 8.49
 2 -1 9 108.91 8.77
 2 -1 9 114.34 9.93
 -2 -1 -10 135.39 11.92
 2 -1 10 150.58 11.21
 2 -1 10 140.16 10.52
 -2 -1 -10 145.2 10.05
 2 -1 10 146.26 11.87
 2 -1 11 4.12 2.61
 2 -1 11 6.38 3.09
 -2 -1 -11 3.05 2.91
 2 -1 11 8.66 3.37
 -2 -1 -12 0.37 2.43
 2 -1 12 -1.14 2.29
 2 -1 13 8.5 3.87
 2 0 -14 18.68 5.35
 -2 0 14 11.82 4.32
 -2 0 13 -2.4 2.93
 -2 0 13 -2.87 2.98
 2 0 -13 0.46 2.47
 2 0 -12 1.31 2.29
 2 0 -12 -0.78 1.71
 -2 0 12 -0.99 2.13
 2 0 -11 27.12 4.12
 2 0 -11 31.16 5.44
 -2 0 11 32.72 5.24
 2 0 -10 10.95 2.76
 2 0 -10 15.78 3.89
 -2 0 10 5.5 2.67
 2 0 -9 89.34 7.83
 -2 0 9 87.49 7.2
 2 0 -9 82.06 6.28
 -2 0 8 38.22 1.85
 2 0 -8 44.32 2.27
 -2 0 8 43.38 1.86
 2 0 -8 43.89 5.28
 -2 0 8 49.86 5.13
 2 0 -8 51.28 4.66
 2 0 -7 33.05 3.58
 2 0 -7 32.12 2.2
 -2 0 7 36 4.07
 2 0 -7 36.25 4.36
 2 0 -6 317.03 12.3
 2 0 -6 300.43 10.4
 -2 0 6 297.65 11.13
 2 0 -6 314.9 8.09
 -2 0 5 1.2 0.73
 2 0 -5 3.79 1.44
 -2 0 5 2.1 1.22
 -2 0 4 64.9 4.44
 2 0 -4 52.14 3.42
 2 0 -4 66.59 4.49
 -2 0 4 69.12 4.06
 2 0 -4 59.8 4.28
 -2 0 4 60.77 4.33
 -2 0 3 8314.16 124.05
 -2 0 3 8105.92 124.34
 -2 0 3 8094.66 124.43
 -2 0 3 8349.25 122.59
 2 0 -3 7999.28 124.41
 2 0 -3 8156.82 124.58
 2 0 -3 8006.99 122.36
 -2 0 2 65.39 3.6
 2 0 -2 64.36 3.54
 -2 0 2 63.72 3.68
 -2 0 2 62.42 3.6
 2 0 -2 63.94 2.19
 2 0 -2 65.39 3.75
 2 0 -2 58.46 3.58
 2 0 -1 642.23 13.85
 2 0 -1 627.99 13.71
 -2 0 1 650.9 13.97
 -2 0 1 620.46 11.82
 2 0 -1 628.24 13.88
 2 0 -1 632.8 11.63
 -2 0 1 653.22 13.93
 -2 0 1 637.99 13.66
 2 0 0 329.36 9.01
 2 0 0 329.92 9.03
 2 0 0 351.64 8.19
 -2 0 0 326.19 8.01
 -2 0 0 331.78 7.49
 -2 0 0 338.25 9.06
 -2 0 0 332.36 9.15
 -2 0 0 348.73 8.43
 2 0 0 334.22 8.2
 -2 0 0 330.52 9.07
 -2 0 -1 1329.29 25.75
 2 0 1 1264.98 25.36
 2 0 1 1296.47 23.35
 -2 0 -1 1274.77 23.43
 -2 0 -1 1361.83 22.97
 2 0 1 1354.77 25.67
 2 0 1 1363.56 26.16
 2 0 1 1352.23 22.88
 -2 0 -1 1306.56 24.98
 -2 0 -1 1303.79 25.18
 2 0 1 1357.61 25.06
 -2 0 -1 1345.88 25.77
 2 0 1 1358.26 24.94
 2 0 2 5848.91 89.89
 2 0 2 5954.61 89.45
 -2 0 -2 6002.6 92.23
 2 0 2 5819.45 93.25
 -2 0 -2 5864.3 93.16
 -2 0 -2 5773.03 93.24
 2 0 2 6021.9 91.83
 -2 0 -2 5760.4 92.29
 2 0 2 5730.08 91.95
 2 0 2 5776.68 92.96
 -2 0 -2 5942.83 89.92
 2 0 3 501.19 15.28
 -2 0 -3 503.58 13.21
 -2 0 -3 538.03 15.78
 -2 0 -3 503.75 15.67
 2 0 3 528.69 13.49
 -2 0 -3 528.43 15.26
 2 0 3 512.97 13.33
 2 0 3 494.01 14.13
 -2 0 -3 489.69 14.36
 2 0 3 495.05 13.1
 -2 0 -3 512.71 15.38
 -2 0 -4 1739.18 35.13
 2 0 4 1772.05 29.07
 2 0 4 1730.01 36.69
 2 0 4 1638.65 33.32
 2 0 4 1710.93 32.85
 2 0 4 1705.45 34.81
 2 0 4 1696.31 33.75
 -2 0 -4 1662.05 35.95
 2 0 5 174.32 5.46
 2 0 5 186.35 8.09
 2 0 5 164.62 8.37
 2 0 5 170.77 8.46
 -2 0 -5 180.93 9.17
 2 0 5 160.95 8.62
 -2 0 -5 176.81 9.66
 2 0 6 14.75 2.77
 2 0 6 14.8 2.79
 -2 0 -6 15.95 3.35
 2 0 6 21.51 2.92
 2 0 6 12.74 1.22
 -2 0 -6 13.97 2.92
 -2 0 -6 16.49 1.57
 2 0 6 19.87 3.44
 2 0 7 1.27 1.64
 2 0 7 1.73 1.61
 -2 0 -7 0.18 1.38
 2 0 7 0.15 1.54
 2 0 7 0.81 1.24
 -2 0 -7 0.54 1.92
 2 0 8 9.92 2.42
 2 0 8 10.16 2.95
 2 0 8 13.67 3.23
 -2 0 -8 9.66 2.79
 -2 0 -8 12.62 3.35
 2 0 8 12.03 3.1
 2 0 9 31.94 5.04
 2 0 9 38.73 5.54
 2 0 9 38.64 5.69
 -2 0 -9 32.2 5.51
 -2 0 -9 37.06 5.37
 2 0 9 33.87 4.34
 2 0 10 14.05 3.92
 2 0 10 10.78 3.73
 -2 0 -10 11.19 3.72
 2 0 10 17.31 3.31
 -2 0 -10 12.43 3.31
 2 0 10 11.15 3.47
 2 0 11 2.64 2.21
 2 0 11 -1.31 2.05
 -2 0 -11 3.99 2.98
 -2 0 -11 -2.21 2.23
 2 0 11 -0.11 1.92
 2 0 12 7.85 3.56
 -2 0 -12 10.03 4.2
 2 0 12 9.27 3.74
 2 0 13 4 3.59
 -2 1 14 6.03 3.44
 -2 1 14 3.09 3.35
 2 1 -14 2.06 2.26
 2 1 -14 -3.88 3.2
 2 1 -13 27.23 5.58
 -2 1 13 21.29 5.36
 -2 1 13 22.36 5.82
 2 1 -13 22.19 4.37
 -2 1 12 5.46 3.32
 -2 1 12 8.71 3.78
 2 1 -12 8.79 3.02
 2 1 -12 16.69 4.23
 -2 1 11 -1.01 2.06
 2 1 -11 2.79 1.97
 -2 1 11 0.44 1.63
 2 1 -11 4.74 2.76
 -2 1 10 27.47 4.99
 2 1 -10 22.1 3.96
 2 1 -10 27.22 4.76
 -2 1 10 29.96 4.12
 2 1 -9 216.8 11.95
 2 1 -9 213.97 11.37
 -2 1 9 220.72 10.43
 2 1 -8 298.58 8.3
 2 1 -8 334.65 13.47
 -2 1 8 285.32 7.84
 -2 1 8 327.05 11.99
 2 1 -8 323.49 13.79
 -2 1 7 101.56 4.52
 -2 1 7 104.24 5.96
 2 1 -7 96.11 6.85
 2 1 -7 99.45 4.67
 2 1 -7 102.61 6.89
 -2 1 7 100.55 5.87
 -2 1 6 1026.63 19.88
 -2 1 6 964.14 21.08
 2 1 -6 1013.03 24.23
 2 1 -6 999.06 20.43
 2 1 -6 1040.46 24.53
 2 1 -6 1021.77 21.35
 -2 1 5 572.59 13.5
 2 1 -5 602.48 16.31
 -2 1 5 579.94 13.77
 2 1 -5 593.07 16.29
 2 1 -5 591.66 14.18
 -2 1 5 612.6 16.39
 2 1 -5 599.07 13.58
 -2 1 4 684.35 17.16
 -2 1 4 660.63 16.23
 2 1 -4 649.15 15.17
 2 1 -4 659.18 16.46
 -2 1 4 692.18 17.59
 -2 1 4 635.13 13.48
 2 1 -4 660.86 13.24
 2 1 -4 653.94 16.66
 -2 1 3 8412.46 129.19
 2 1 -3 8364.53 129.25
 2 1 -3 8689.16 128.1
 -2 1 3 8312.07 128.09
 2 1 -3 8329.53 128.44
 2 1 -3 8409.3 129.2
 -2 1 3 8567.23 128.74
 -2 1 2 1067.47 20.95
 2 1 -2 1066.63 21.17
 -2 1 2 1092.98 21.23
 2 1 -2 1114.97 20.84
 2 1 -2 1056.82 21.52
 2 1 -2 1025.33 19.16
 2 1 -2 1112.5 21.85
 2 1 -2 1072.22 21.7
 -2 1 2 1106.64 20.79
 2 1 -1 3808.92 60.73
 -2 1 1 3861.66 59.42
 2 1 -1 3706.62 60.69
 -2 1 1 3793.18 58.69
 2 1 -1 3828.73 59.15
 -2 1 1 3767.64 60.02
 2 1 -1 3743.27 59.1
 -2 1 1 3755.16 58.94
 -2 1 1 3706.22 60.42
 2 1 -1 3768.71 60.84
 -2 1 0 7.19 1.41
 2 1 0 8.17 1.16
 2 1 0 8.04 1.48
 2 1 0 15 1.85
 -2 1 0 18.15 1.6
 -2 1 0 7.49 1.33
 2 1 0 6.71 1.28
 2 1 0 12.04 1.67
 2 1 0 5.83 1.11
 -2 1 0 11.08 1.53
 -2 1 -1 25.86 2.69
 2 1 1 31.69 2.78
 -2 1 -1 26.69 2.76
 2 1 1 29.6 2.95
 2 1 1 26.69 2.93
 2 1 1 29.13 2.54
 -2 1 -1 25.93 2.66
 2 1 1 25.32 2.54
 2 1 1 27.57 2.48
 -2 1 -1 23.78 2.05
 2 1 1 29.61 2.38
 2 1 2 543.52 14.57
 2 1 2 513.54 13.54
 -2 1 -2 528.57 13.25
 2 1 2 520.7 15.65
 2 1 2 549.4 13.79
 -2 1 -2 531.79 13.42
 -2 1 -2 525.3 15.43
 2 1 2 522.69 12.93
 -2 1 -2 527.05 14.98
 -2 1 -2 525.91 14.95
 2 1 2 515.48 14.14
 -2 1 -2 523.72 14.72
 2 1 3 92.31 5.65
 2 1 3 94.42 5.75
 -2 1 -3 91.9 5.47
 2 1 3 88.21 4.58
 -2 1 -3 88.61 6
 -2 1 -3 93.63 6.39
 2 1 3 95.17 5.39
 -2 1 -3 91.06 5.26
 2 1 3 90.96 6.41
 2 1 4 661.05 18.51
 2 1 4 664.86 18.72
 -2 1 -4 656.31 19.31
 2 1 4 678.75 20.75
 2 1 4 646.63 14.91
 2 1 4 641.28 16.99
 2 1 4 634.34 16.25
 -2 1 -4 629.45 17.44
 2 1 5 292.84 12.59
 -2 1 -5 313.15 9.11
 2 1 5 323.94 11.62
 2 1 5 305.13 8.93
 2 1 5 294.67 10.84
 -2 1 -5 302.74 13.21
 2 1 5 316.34 12.78
 -2 1 -5 311.07 12.19
 2 1 6 28.62 4.1
 2 1 6 29.17 2.31
 2 1 6 26.59 3.38
 2 1 6 23.22 3.89
 -2 1 -6 25.75 3.78
 2 1 6 30.18 3.59
 -2 1 -6 33.61 4.67
 -2 1 -6 29.55 2.44
 2 1 7 213.02 10.27
 -2 1 -7 212.94 11.38
 2 1 7 211.43 11.89
 -2 1 -7 207.38 6.37
 2 1 7 216.05 10.27
 -2 1 -7 203.93 12.05
 2 1 7 217.01 12.05
 -2 1 -8 186.84 11.45
 2 1 8 206.79 10.39
 2 1 8 184.13 11.86
 -2 1 -8 194.13 12.22
 2 1 8 212.26 12.64
 2 1 8 196.25 10.45
 2 1 9 112.32 9.83
 2 1 9 105.6 8
 -2 1 -9 104.99 9.44
 -2 1 -9 103.77 8.93
 2 1 9 98.78 7.45
 2 1 9 109.77 9.65
 2 1 10 136.85 11.51
 -2 1 -10 149.93 11.4
 2 1 10 119.73 10.78
 -2 1 -10 130.51 10.89
 2 1 10 135.38 9.62
 2 1 10 151.33 9.52
 2 1 11 3.64 2.67
 2 1 11 0.46 1.89
 -2 1 -11 6.88 3.21
 -2 1 -11 4.68 3.03
 2 1 12 5.91 3.4
 2 1 12 0.03 2.06
 -2 1 -12 -1.21 2.14
 -2 1 -12 -2.13 2.59
 2 1 13 11.05 3.99
 2 1 13 7.86 3.98
 -2 1 -13 3.1 2.97
 -2 1 -13 0.74 1.65
 -2 2 14 11.56 4.53
 2 2 -14 8.92 3.4
 -2 2 13 15.35 5.02
 2 2 -13 11.16 3.62
 -2 2 13 15.71 5.2
 2 2 -13 15.38 4.26
 2 2 -12 7.79 3.25
 -2 2 12 8.01 3.75
 -2 2 12 10.58 4.1
 2 2 -12 8.12 3.3
 2 2 -11 52.54 6.56
 -2 2 11 39.73 6.63
 -2 2 11 52.26 7.43
 2 2 -11 39.13 5.84
 -2 2 10 146.55 11.56
 2 2 -10 119.87 9.49
 -2 2 10 131.72 11.06
 2 2 -10 107.69 8.86
 -2 2 9 7.13 1.51
 -2 2 9 5.88 2.67
 -2 2 9 7.09 2.99
 2 2 -9 4.94 2.48
 -2 2 9 5.28 1.48
 2 2 -9 4.86 2.27
 2 2 -8 349.87 14.17
 -2 2 8 362.34 16.41
 2 2 -8 342.68 15
 -2 2 8 342.64 11.07
 -2 2 8 323.35 10.13
 -2 2 8 365.49 16.61
 -2 2 8 336.14 10.38
 2 2 -8 349.52 11.28
 2 2 -7 214.02 8.68
 -2 2 7 225.07 11.99
 -2 2 7 201.53 8.42
 -2 2 7 217.73 7.16
 2 2 -7 224.15 11.21
 2 2 -7 188.6 9.57
 -2 2 7 222.18 10.52
 -2 2 7 213.51 7.15
 -2 2 7 219.53 11.83
 -2 2 6 283.15 11.13
 2 2 -6 290.87 10.38
 -2 2 6 287.08 7.66
 -2 2 6 269.74 10
 -2 2 6 280.4 12.67
 -2 2 6 275.57 12.56
 -2 2 6 287.15 7.67
 2 2 -6 280.31 10.19
 2 2 -6 284.53 12.16
 2 2 -5 1361.84 29.96
 -2 2 5 1226.9 21.95
 -2 2 5 1381.55 30.71
 -2 2 5 1355.33 30.48
 -2 2 5 1331.65 27.51
 2 2 -5 1320.57 27.77
 2 2 -5 1334.48 28.7
 -2 2 5 1295.52 22.14
 2 2 -5 1332.86 26.15
 -2 2 5 1344.16 27.72
 2 2 -4 633.33 17.5
 -2 2 4 617.99 11.69
 -2 2 4 631.89 17.5
 2 2 -4 645.12 16.65
 -2 2 4 632.08 17.41
 -2 2 4 616.1 15.58
 2 2 -4 649.42 14.64
 2 2 -4 636.75 16.66
 -2 2 4 619.42 16.4
 2 2 -4 635.6 17.07
 -2 2 3 2372.08 43.36
 -2 2 3 2425.22 43.3
 2 2 -3 2384.81 44.33
 -2 2 3 2460.33 43.36
 2 2 -3 2499.74 44.04
 2 2 -3 2383.84 42.67
 -2 2 3 2334.61 43.51
 -2 2 3 2359.14 38.22
 2 2 -3 2520.69 44.9
 2 2 -3 2415.92 40.4
 -2 2 3 2424.23 41.58
 2 2 -3 2423.57 42.83
 -2 2 2 413.06 11.2
 2 2 -2 411.01 13.2
 -2 2 2 437.01 11.37
 -2 2 2 397.45 12.53
 2 2 -2 450.65 13.53
 -2 2 2 411.5 10.92
 -2 2 2 426.23 10.21
 2 2 -2 423.86 12.16
 2 2 -2 420.5 11.78
 -2 2 2 430.21 11.59
 2 2 -2 428.68 11.83
 2 2 -1 451.64 10.18
 2 2 -1 477.13 13.99
 -2 2 1 473.44 10.69
 -2 2 1 438.87 10.47
 2 2 -1 450.95 13.86
 2 2 -1 464.57 13.87
 2 2 -1 448.92 12.01
 2 2 -1 459.06 12.48
 2 2 -1 455.63 12.4
 -2 2 1 432.34 11.5
 -2 2 1 440.41 11.63
 -2 2 1 469.69 13.72
 -2 2 1 444.68 10.85
 -2 2 1 467.85 13.6
 -2 2 1 453.26 9.83
 2 2 -1 431.89 12.01
 2 2 0 1010.91 23.02
 -2 2 0 973.83 22.77
 -2 2 0 970.6 16.82
 2 2 0 951.29 17.78
 2 2 0 982.81 22.02
 2 2 0 952.55 22.51
 2 2 0 987.55 22.88
 -2 2 0 933.09 21.15
 2 2 0 1019.02 22.09
 2 2 0 1018.54 21.73
 -2 2 0 1006.07 17.69
 -2 2 0 973.96 21.5
 -2 2 0 972.34 20.9
 -2 2 0 993.87 16.72
 -2 2 0 973.18 22.19
 2 2 1 69.76 4.98
 -2 2 -1 67.22 4.83
 2 2 1 56.53 4.6
 2 2 1 69.85 4.73
 2 2 1 71.34 5.23
 -2 2 -1 65.29 4.68
 -2 2 -1 62.96 4.56
 2 2 1 61.5 3.17
 2 2 1 67.06 4.78
 -2 2 -1 69.86 4.9
 2 2 1 65.47 4.94
 -2 2 -1 64.34 2.69
 -2 2 -1 67.89 2.73
 2 2 2 2909.3 53.65
 2 2 2 2947.17 51.8
 2 2 2 2878.86 48.02
 2 2 2 2972.28 54.81
 -2 2 -2 2874.57 53.1
 -2 2 -2 2815.13 46.58
 -2 2 -2 2948.15 46.75
 2 2 2 2960.39 51.81
 2 2 2 2903.55 53.26
 -2 2 -2 2917.79 53.64
 -2 2 -2 2930.35 51.36
 2 2 3 168.13 7.22
 2 2 3 169.96 9.11
 -2 2 -3 177.75 6.93
 2 2 3 191.05 10.13
 2 2 3 174.68 9.08
 2 2 3 160.19 8
 2 2 3 140.4 7.15
 -2 2 -3 168.96 9.14
 -2 2 -3 170.83 7.71
 -2 2 -3 159.04 6.3
 2 2 4 1149.26 25.4
 2 2 4 1217.22 29.92
 -2 2 -4 1146.25 29.73
 2 2 4 1177.96 29.25
 2 2 4 1204.67 27.38
 -2 2 -4 1154.04 24.41
 -2 2 -4 1185.68 25.61
 2 2 5 31.69 3.28
 -2 2 -5 28.83 3.17
 2 2 5 27.2 4.23
 2 2 5 35.36 4.03
 -2 2 -5 37.08 4.98
 2 2 5 29.4 4.2
 -2 2 -5 28.4 3.29
 -2 2 -6 89.39 6.25
 -2 2 -6 94.53 5.6
 2 2 6 87.39 6.63
 2 2 6 98.92 8.24
 2 2 6 92.27 5.47
 -2 2 -6 98.62 8.34
 2 2 6 87.09 7.62
 -2 2 -7 7.84 3.08
 2 2 7 6.5 2.27
 2 2 7 8.51 3.08
 -2 2 -7 4.66 1.93
 2 2 7 3.8 2.34
 -2 2 -7 6.91 1.61
 2 2 8 12.13 3.72
 -2 2 -8 20.45 4.51
 -2 2 -8 22.54 3.88
 2 2 8 15.71 3.95
 2 2 8 24.5 3.89
 -2 2 -9 80.65 7.43
 2 2 9 61.58 7.68
 2 2 9 82.15 8.79
 -2 2 -9 68.94 8.07
 2 2 9 70.54 6.67
 2 2 10 4.05 3.26
 -2 2 -10 8.12 3.27
 2 2 10 7.47 2.71
 -2 2 -10 5.24 2.88
 2 2 10 12.81 4.18
 2 2 11 22.44 5.42
 -2 2 -11 16.59 4.79
 2 2 11 13.35 4.25
 2 2 12 4.99 3.52
 2 2 12 -0.21 2.58
 -2 2 -12 9.02 4.04
 -2 3 13 4.75 2.84
 2 3 -13 0.11 0.81
 -2 3 12 -2.95 2.65
 -2 3 12 3.97 3.56
 -2 3 12 1.16 1.93
 2 3 -12 3.76 3.18
 -2 3 11 10.99 3.85
 -2 3 11 4.33 2.83
 -2 3 11 10.54 3.3
 2 3 -11 6.62 2.89
 2 3 -11 2.4 2.1
 -2 3 10 28.13 5.69
 -2 3 10 33.53 6.03
 -2 3 10 18.95 3.73
 2 3 -10 27.61 5.08
 -2 3 9 81.84 8.57
 2 3 -9 87.96 8.33
 2 3 -9 76.88 7.16
 -2 3 9 80.2 8.47
 -2 3 9 88.46 7.33
 -2 3 9 71.58 5.76
 2 3 -8 64.83 6.18
 -2 3 8 62.41 5.75
 -2 3 8 58.53 5.28
 -2 3 8 72.85 7.68
 -2 3 8 73.49 7.73
 2 3 -8 56.7 6.48
 -2 3 7 14.99 2.85
 2 3 -7 10.49 2.86
 -2 3 7 22.71 4.36
 2 3 -7 16.67 2.99
 2 3 -7 10.37 2.69
 -2 3 7 15.65 2.8
 -2 3 7 15.2 3.59
 2 3 -6 250.15 11.41
 2 3 -6 251.42 11.14
 2 3 -6 242.81 12.14
 2 3 -6 247.67 10.74
 -2 3 6 244.68 12.48
 -2 3 6 245.56 10.1
 -2 3 6 265.94 13
 -2 3 6 240.48 11.04
 2 3 -5 716.42 20.88
 -2 3 5 774.67 22.59
 -2 3 5 738.37 21.01
 2 3 -5 763.52 19.67
 -2 3 5 735.95 18.43
 2 3 -5 749.47 21.89
 -2 3 5 749.98 22.14
 2 3 -5 751.38 21.52
 -2 3 4 57.49 5.25
 2 3 -4 64.53 5.54
 -2 3 4 63.7 5.46
 -2 3 4 55.22 2.24
 2 3 -4 53.91 5.17
 -2 3 4 56.61 5.3
 -2 3 4 59.99 4.08
 2 3 -4 57.75 5.21
 -2 3 4 50.7 2.1
 2 3 -4 63.08 4.59
 2 3 -4 58.52 4.45
 2 3 -4 67.56 4.69
 -2 3 3 2454.58 45.73
 -2 3 3 2361.48 39.01
 2 3 -3 2446.51 42.89
 2 3 -3 2445.99 47.34
 2 3 -3 2363.51 47.51
 -2 3 3 2379.91 46.92
 2 3 -3 2375.03 39.85
 -2 3 3 2329.32 41.02
 2 3 -3 2468.59 45.69
 -2 3 3 2349.43 44.79
 -2 3 3 2331.42 38.87
 2 3 -3 2379.4 42.7
 -2 3 2 224.37 8.27
 -2 3 2 239.15 10.9
 2 3 -2 238.24 8.77
 2 3 -2 241.76 10.88
 -2 3 2 218.6 8.79
 2 3 -2 230.52 10.9
 -2 3 2 228.74 7.85
 2 3 -2 229.52 9.36
 2 3 -2 220.82 7.88
 -2 3 2 237.1 9.39
 -2 3 2 232.24 7.86
 -2 3 2 221.64 7.61
 -2 3 1 1047.65 23.14
 -2 3 1 1102.17 20.82
 2 3 -1 1064.93 26.5
 -2 3 1 1085.3 22.4
 2 3 -1 1081.89 23.53
 -2 3 1 1085.06 23.32
 2 3 -1 1082.79 23.74
 -2 3 1 1101.91 26.84
 2 3 -1 1116.04 27.13
 -2 3 1 1055.58 22.1
 -2 3 1 1097.97 23.37
 2 3 -1 1101.35 27.6
 2 3 -1 1046.71 23.3
 -2 3 0 1016.31 17.66
 -2 3 0 979.19 19.72
 2 3 0 1076.33 26.09
 2 3 0 980.4 23.64
 2 3 0 1004.8 23.42
 -2 3 0 1009.54 25.54
 -2 3 0 1025.2 23.65
 -2 3 0 976.46 22.12
 2 3 0 1005.66 25.46
 2 3 0 1029.06 26.19
 2 3 1 6.36 2.18
 2 3 1 7.91 2.22
 2 3 1 5.66 2.04
 2 3 1 4.33 1.77
 2 3 1 6.33 0.79
 -2 3 -1 5.85 1.84
 2 3 1 5.68 2.09
 -2 3 -1 4.81 1.88
 -2 3 -1 4.16 1.52
 2 3 2 235.64 6.74
 2 3 2 246.49 11.05
 2 3 2 250.67 11.83
 -2 3 -2 237.42 11.17
 -2 3 -2 235.16 10.86
 2 3 2 260.4 11.16
 2 3 2 245.87 11.8
 2 3 2 233.38 11.01
 2 3 3 1.26 1.22
 2 3 3 0.95 1.31
 2 3 3 0.36 1.24
 -2 3 -3 1.89 0.62
 -2 3 -3 2.83 0.63
 -2 3 -3 0.82 1.47
 2 3 3 2.09 1.58
 2 3 3 0.43 1.18
 2 3 3 1.56 0.68
 -2 3 -3 2.57 1.63
 -2 3 -3 1.99 0.66
 2 3 4 203.25 11.64
 -2 3 -4 223.89 12.13
 2 3 4 207.55 10.1
 2 3 4 192.34 8.09
 -2 3 -4 203.76 6.63
 2 3 4 205.6 10.48
 -2 3 -4 193.14 6.86
 2 3 4 206.99 11.61
 -2 3 -4 188.97 7.31
 -2 3 -4 221.92 10.4
 -2 3 -5 195.41 7.45
 2 3 5 169.71 11.07
 -2 3 -5 172.97 8.02
 -2 3 -5 190.32 11.85
 2 3 5 199.57 9.8
 -2 3 -5 173.34 7.48
 2 3 5 181.23 11.55
 2 3 5 190.61 10.33
 -2 3 -5 184.16 9.6
 -2 3 -6 126.73 6.65
 2 3 6 129.79 10.19
 2 3 6 128.18 9.97
 -2 3 -6 116.57 7.54
 -2 3 -6 133.24 10.47
 2 3 6 127.81 8.7
 -2 3 -7 93.82 6.27
 2 3 7 97.1 9.28
 -2 3 -7 87.62 8.88
 2 3 7 73.49 8.06
 2 3 7 88.43 7.49
 -2 3 -7 90.84 6.58
 -2 3 -8 55.52 5.36
 2 3 8 70.22 8.41
 2 3 8 75.06 8.47
 2 3 8 62.5 6.72
 -2 3 -8 59.79 7.58
 -2 3 -9 57.83 7.88
 2 3 9 33.15 5.06
 2 3 9 46.91 7.37
 2 3 9 48.32 7.4
 -2 3 -10 58.54 8.17
 2 3 10 43.5 5.86
 2 3 10 53.15 8.06
 2 3 10 45.76 7.57
 2 3 11 7.82 3.81
 2 3 11 6.98 4.36
 -2 3 -11 6.35 3.56
 -2 4 12 -0.16 2.42
 -2 4 12 4.91 3.17
 2 4 -12 2.96 2.9
 -2 4 11 60.53 8.66
 -2 4 11 69.43 9.33
 2 4 -11 59.52 7.99
 -2 4 10 20.37 5.12
 2 4 -10 22.14 4.8
 -2 4 10 21.42 5.12
 2 4 -9 0.79 1.44
 -2 4 9 3.52 2.64
 -2 4 9 2.85 1.74
 2 4 -9 2.39 2.27
 -2 4 9 -1.01 1.58
 -2 4 9 0.72 2.54
 -2 4 8 29.79 4
 -2 4 8 32.83 5.55
 -2 4 8 25.66 4.11
 -2 4 8 33.54 5.7
 2 4 -8 42.58 4.9
 2 4 -8 42.75 6.1
 2 4 -7 11.82 3.06
 -2 4 7 18.75 4.33
 -2 4 7 12.35 3.51
 -2 4 7 17.29 2.93
 2 4 -7 17.76 2.98
 -2 4 7 26.7 4.36
 2 4 -7 21.98 4.24
 -2 4 6 87.69 7.87
 -2 4 6 73.31 6.82
 -2 4 6 84.97 5.56
 2 4 -6 100.01 8.19
 2 4 -6 66.15 5.31
 -2 4 6 86.9 7.92
 2 4 -6 74.37 6.91
 2 4 -6 75.49 6.92
 -2 4 5 14.52 2.17
 2 4 -5 10.1 2.7
 2 4 -5 12.72 2.21
 -2 4 5 11.53 2.99
 2 4 -5 7.57 2.47
 -2 4 5 13.05 3.2
 2 4 -5 14.3 2.31
 -2 4 5 10.23 2.99
 2 4 -5 10.95 2.84
 2 4 -4 15.98 3.57
 2 4 -4 18.71 2.51
 2 4 -4 16.37 3.34
 -2 4 4 13.04 2.87
 -2 4 4 18.6 3.5
 2 4 -4 14.96 2.25
 -2 4 4 15.06 1.98
 -2 4 4 16.68 3.34
 2 4 -4 15.68 3.19
 -2 4 4 15.89 1.24
 2 4 -3 116.27 8.65
 -2 4 3 106.6 7.43
 2 4 -3 114.28 6.08
 -2 4 3 94.56 7.79
 2 4 -3 98.05 8.05
 2 4 -3 112.68 7.42
 -2 4 3 100.83 4.93
 -2 4 3 105.63 4.83
 -2 4 3 103.78 4.81
 -2 4 3 102.27 7.18
 2 4 -2 258.99 13.13
 2 4 -2 244.62 12.57
 -2 4 2 241.16 10.43
 -2 4 2 240.22 8.11
 -2 4 2 243.42 8.91
 -2 4 2 229.78 8.75
 -2 4 2 241.96 12.45
 2 4 -2 249.22 10.67
 2 4 -2 245.2 9.5
 -2 4 2 232.84 9.11
 -2 4 2 250.89 11.17
 2 4 -1 201.58 11.26
 2 4 -1 196.87 10.83
 -2 4 1 175.44 8.28
 -2 4 1 205.82 9
 -2 4 1 196.55 7.74
 2 4 -1 210.61 9.27
 2 4 -1 194.8 11.35
 -2 4 1 199.62 9.54
 2 4 -1 205.77 9.02
 -2 4 1 206.18 11.48
 -2 4 1 195.15 6.96
 -2 4 0 1113.61 29.56
 2 4 0 1088.38 29.11
 2 4 0 1048.56 28.22
 -2 4 0 1001.85 22.59
 -2 4 0 962.54 17.52
 2 4 0 1071.27 29.53
 -2 4 0 1071.63 25.8
 2 4 0 1089.49 23.78
 -2 4 0 996.88 23.12
 2 4 1 791.31 25.09
 2 4 1 807.01 24.76
 -2 4 -1 851.52 25.27
 2 4 1 811.05 24.86
 -2 4 -1 836.58 23.38
 2 4 2 886.32 26.2
 -2 4 -2 881 25.44
 2 4 2 912.91 27.11
 2 4 2 920.08 27.36
 -2 4 -2 880.78 26.16
 2 4 2 798.32 25.52
 2 4 3 94.25 8.31
 2 4 3 95.66 7.93
 -2 4 -3 74.57 7.18
 2 4 3 102.47 8.63
 2 4 3 82.21 3.26
 -2 4 -3 87.88 7.44
 2 4 3 96.35 7.84
 2 4 4 389.92 17.95
 2 4 4 396.91 18.1
 2 4 4 405.81 16.89
 -2 4 -4 393.79 16.53
 -2 4 -4 413.94 17.94
 2 4 4 395.13 16.4
 2 4 5 23.27 4.14
 -2 4 -5 26.61 4.34
 2 4 5 25.87 4.87
 -2 4 -5 20.68 4.32
 2 4 5 32.77 5.52
 2 4 6 14.2 4.03
 2 4 6 13.16 4.19
 -2 4 -6 17.66 4.44
 -2 4 -6 11.03 2.88
 -2 4 -7 26.97 4.24
 2 4 7 28.48 5.5
 -2 4 -7 26.7 5.58
 2 4 7 31.3 5.84
 -2 4 -8 27.97 5.63
 2 4 8 24.46 5.49
 2 4 8 27.83 5.9
 2 4 9 4.6 3.61
 -2 4 -9 -3.23 2.87
 2 4 9 4.63 3.28
 2 4 10 2.12 2.69
 -2 4 -10 3.83 3.06
 2 4 10 6.83 4.44
 -2 5 11 0.05 2.22
 2 5 -11 2.12 2.22
 -2 5 11 2.1 2.76
 -2 5 10 34.76 6.77
 -2 5 10 32.74 6.37
 2 5 -10 38.1 6.61
 -2 5 9 3.12 2.54
 -2 5 9 0.87 2.04
 2 5 -9 6.8 3.04
 -2 5 8 22.93 5.29
 -2 5 8 40.26 6.64
 -2 5 8 23.89 4.77
 2 5 -8 35.77 5.61
 2 5 -8 27.39 5.37
 2 5 -7 16.37 4.07
 -2 5 7 19.9 4.63
 -2 5 7 15.33 4.05
 -2 5 7 13.7 3.93
 2 5 -7 12.1 3.71
 -2 5 6 342.78 17.48
 -2 5 6 354.43 17.58
 2 5 -6 359.04 17.68
 2 5 -6 351.34 16.94
 -2 5 6 364.54 17.69
 -2 5 5 187.67 12.09
 -2 5 5 181.87 12.37
 -2 5 5 203.39 12.75
 2 5 -5 207.76 12.27
 2 5 -5 197.5 12.86
 2 5 -5 200.51 8.55
 -2 5 4 256.6 13.63
 2 5 -4 283.2 15.47
 2 5 -4 261.05 13.25
 -2 5 4 253.19 14.53
 2 5 -4 259.27 9.8
 -2 5 4 264.46 13.99
 -2 5 3 443.67 17.18
 -2 5 3 393.13 18.36
 2 5 -3 423.91 13.31
 2 5 -3 434.66 16.59
 -2 5 3 407.84 10.6
 -2 5 3 430.42 17.62
 2 5 -3 430.46 19.46
 -2 5 3 420.97 11.76
 2 5 -2 14.16 3.74
 -2 5 2 8.83 3.17
 2 5 -2 7.26 3.14
 -2 5 2 6.83 2.27
 -2 5 2 9.21 1.94
 -2 5 2 6.63 1.35
 2 5 -2 9.64 2.6
 -2 5 2 6.28 2.4
 2 5 -1 333.06 15.75
 -2 5 1 325.06 13.02
 2 5 -1 329.45 16.34
 2 5 -1 343.45 13.27
 -2 5 1 337.8 16.68
 2 5 -1 323.85 16.6
 -2 5 1 321.61 12.55
 2 5 0 93.47 8.84
 2 5 0 94.34 8.35
 -2 5 0 121.7 9.84
 -2 5 0 101.2 7.29
 -2 5 0 97.59 6.51
 2 5 0 112.26 6.86
 2 5 0 121.22 9.66
 2 5 1 115.41 9.79
 2 5 1 125.94 9.76
 -2 5 -1 132.51 10.29
 -2 5 -1 116.31 8.31
 -2 5 -2 119.63 9.77
 2 5 2 107.55 9.28
 2 5 2 113.1 9.74
 2 5 2 123.16 10.12
 -2 5 -2 119.8 9
 2 5 3 4.64 2.61
 2 5 3 2.32 2.27
 -2 5 -3 1.42 1.54
 2 5 3 1.79 1.95
 -2 5 -3 0.34 2.35
 2 5 4 29.2 5.07
 2 5 4 29.82 5.37
 2 5 4 37.84 5.98
 -2 5 -4 29.89 5.25
 -2 5 -4 35.23 5.63
 2 5 5 177.46 13.36
 2 5 5 173.87 13.22
 -2 5 -5 194.26 12.65
 2 5 5 205.89 13.11
 -2 5 -5 183.7 13.01
 2 5 6 14.24 4.44
 -2 5 -6 9.16 3.02
 -2 5 -6 23.18 5.18
 2 5 6 15.99 4.36
 -2 5 -7 120.76 11.41
 2 5 7 111.82 11.52
 2 5 7 111.58 11.39
 -2 5 -7 104.23 9.37
 -2 5 -8 1.12 3.17
 2 5 8 0.31 2.46
 2 5 8 -0.16 2.99
 -2 5 -9 0.96 2.54
 2 5 9 6.2 3.79
 2 5 9 1.1 3.11
 -2 6 9 -0.7 2.58
 -2 6 9 5.99 4.02
 2 6 -9 0.82 2.96
 2 6 -8 7.67 3.01
 -2 6 8 9.89 4.16
 -2 6 8 -2.96 2.87
 2 6 -8 4.88 3.22
 -2 6 8 1.72 2.59
 -2 6 7 12.19 4.3
 -2 6 7 4.82 2.81
 -2 6 7 13.9 4.42
 2 6 -7 10.08 3.65
 2 6 -7 16.86 4.39
 2 6 -6 20.57 4.9
 -2 6 6 15.52 4.2
 -2 6 6 19.44 4.77
 -2 6 6 21.01 4.88
 2 6 -6 24.8 4.83
 2 6 -5 54.85 7.59
 -2 6 5 54.48 7.55
 -2 6 5 60.64 7.33
 -2 6 5 45.14 6.51
 2 6 -5 52.03 6.63
 2 6 -4 38.61 6.36
 -2 6 4 30.06 5.83
 2 6 -4 29.4 4.82
 -2 6 4 33.54 5.6
 -2 6 4 33.92 5.34
 -2 6 3 86.28 7.86
 -2 6 3 78.52 8.09
 -2 6 3 67.77 8.39
 2 6 -3 83.3 9.3
 2 6 -3 77.91 7.4
 -2 6 2 16.74 4.7
 2 6 -2 33.39 6.11
 -2 6 2 19.85 3.87
 2 6 -2 23.12 4.05
 -2 6 1 91.1 6.84
 -2 6 1 89.88 7.48
 2 6 -1 94.2 9.73
 2 6 -1 88.33 7.09
 -2 6 1 85.72 9.34
 2 6 0 98.81 9.33
 -2 6 0 98.58 9.9
 -2 6 0 88.69 7.4
 2 6 0 89.76 9.64
 -2 6 -1 33.86 6.06
 2 6 1 31.38 5.62
 -2 6 -1 34.14 4.92
 2 6 1 29.69 5.88
 2 6 2 136.57 11.51
 -2 6 -2 157.83 12.58
 2 6 2 131.91 11.68
 -2 6 -2 134.83 10.22
 2 6 3 5.63 2.96
 -2 6 -3 9.29 3.4
 2 6 3 6.47 3.21
 -2 6 -3 3.84 2.59
 2 6 4 78.14 9.28
 -2 6 -4 72.66 8.31
 2 6 4 75.11 9.29
 -2 6 -4 66.01 8.35
 2 6 4 74.26 8.89
 -2 6 -5 28.38 5.73
 2 6 5 29.97 6.17
 2 6 5 28.81 5.9
 -2 6 -5 33.18 6.11
 2 6 5 23.62 5.27
 2 6 6 9 3.88
 2 6 6 6.78 3.61
 -2 6 -6 12.44 3.87
 -2 6 -6 5.96 3.44
 2 6 6 1.28 2.05
 2 6 7 14.84 4.95
 -2 6 -7 12.95 4.09
 -2 6 -7 12.8 5
 2 6 7 5.33 3.12
 -2 7 8 19.07 5.56
 -2 7 8 10.83 4.32
 -2 7 7 14 4.61
 2 7 -7 21.2 5.4
 -2 7 7 19.33 5.7
 -2 7 7 18.49 5.22
 2 7 -7 17.92 5.06
 -2 7 6 59.62 8.81
 2 7 -6 61.26 8.96
 -2 7 6 61.1 8.21
 -2 7 6 61.08 8.71
 2 7 -6 64.17 8.17
 -2 7 5 11.05 3.78
 -2 7 5 11.14 3.92
 2 7 -5 10.83 3.84
 -2 7 5 16.27 4.91
 2 7 -5 15.54 5
 2 7 -4 29.26 6.55
 -2 7 4 40.53 6.64
 -2 7 4 29.44 6.45
 2 7 -4 23.07 4.7
 -2 7 4 21.43 4.73
 2 7 -3 7 2.82
 2 7 -3 5.66 3.75
 -2 7 3 8.04 3.94
 -2 7 2 5.44 3.51
 2 7 -2 5.48 3.29
 2 7 -2 9.38 2.86
 -2 7 1 6.84 3.44
 2 7 -1 7.66 3.51
 -2 7 0 3.97 2.75
 2 7 0 9.08 3.71
 2 7 1 1.28 2.54
 -2 7 -1 3.15 2.8
 2 7 1 -0.53 2.14
 -2 7 -1 2.65 2.07
 2 7 2 20.68 5.43
 2 7 2 20.94 5.25
 -2 7 -2 17.37 3.98
 -2 7 -2 11.48 4.28
 2 7 3 12.24 4.43
 2 7 3 7.91 4.02
 -2 7 -3 12 3.76
 -2 7 -3 15.94 4.91
 2 7 4 16.8 5.14
 -2 7 -4 6.49 3.47
 2 7 4 16.46 4.98
 -2 7 -4 11.65 3.99
 2 7 5 35.72 7.02
 2 7 5 55.7 8.96
 -2 7 -5 47.34 7.7
 2 7 5 42.03 7.37
 -2 7 -5 37.79 7.01
 -2 7 -6 7.73 3.6
 2 7 6 2.19 2.86
 -2 7 -6 0.41 2.46
 2 8 -5 0.96 2.38
 2 8 2 29.88 6.45
 -2 8 -4 -0.19 2.34
 -3 -8 5 15.21 4.72
 -3 -8 2 49.35 8.02
 -3 -8 1 9.55 3.83
 -3 -8 0 64.91 9.33
 -3 -8 -1 21.02 5.84
 -3 -7 7 16.27 5.15
 3 -7 -7 14.64 4.58
 -3 -7 6 36.1 7.14
 3 -7 -6 47.78 8.53
 3 -7 -5 84.4 10.85
 -3 -7 5 61.92 8.86
 3 -7 -4 71.8 9.7
 -3 -7 4 63.49 8.07
 -3 -7 4 54.29 7.87
 3 -7 -3 70.54 9.66
 -3 -7 3 68.76 8.3
 -3 -7 3 73.32 8.73
 -3 -7 2 24.49 5.39
 3 -7 -2 28.11 6.53
 -3 -7 2 23.04 4.79
 -3 -7 1 -0.9 1.61
 3 -7 -1 6.62 3.41
 3 -7 0 9.08 4.16
 -3 -7 0 -1.22 1.59
 3 -7 1 21.99 6.01
 3 -7 1 21.54 4.78
 -3 -7 -1 24.5 5.26
 3 -7 2 2.04 2.67
 3 -7 2 4.16 2.79
 -3 -7 -2 2.73 2.68
 3 -7 3 15.16 4.61
 3 -7 3 18.96 4.84
 -3 -7 -3 21.56 5.37
 3 -7 4 7.47 3.47
 3 -7 4 3.1 2.44
 -3 -7 -4 -3.22 2.25
 -3 -7 -5 -0.13 1.67
 3 -7 5 2.48 2.87
 3 -7 5 4.61 3.54
 -3 -7 -6 3.16 3.02
 3 -6 -10 10.16 3.8
 3 -6 -9 12.54 3.76
 -3 -6 9 4.37 4.07
 3 -6 -9 14.5 5.26
 -3 -6 8 20.95 5.91
 3 -6 -8 21.31 4.81
 3 -6 -8 14.68 4.89
 -3 -6 7 -2.51 2.35
 3 -6 -7 2.03 1.69
 3 -6 -7 -0.77 2.06
 -3 -6 6 15.61 3.64
 -3 -6 6 25.62 5.73
 3 -6 -6 14.22 3.62
 3 -6 -6 11.18 3.73
 -3 -6 5 16.8 3.97
 -3 -6 5 25.39 5.33
 3 -6 -5 16.46 3.44
 3 -6 -5 19.81 5.24
 3 -6 -4 35.43 6.32
 -3 -6 4 52.36 6.5
 -3 -6 4 48.69 6.78
 -3 -6 3 83.22 8.54
 3 -6 -3 96.82 10.27
 -3 -6 3 91.19 8.52
 -3 -6 2 30.66 5.1
 3 -6 -2 39.7 6.79
 -3 -6 2 32.67 5.11
 3 -6 -1 33.43 6.17
 -3 -6 1 38.3 4.78
 -3 -6 1 36.79 5.63
 -3 -6 1 38.07 4.79
 3 -6 -1 38.45 4.87
 -3 -6 1 41.38 5.45
 -3 -6 0 65.31 6.48
 3 -6 0 69.89 7.13
 -3 -6 0 80.73 8.32
 3 -6 0 74.57 9.31
 -3 -6 0 72.78 6.87
 -3 -6 0 67.54 6.76
 3 -6 1 33.35 5.22
 3 -6 1 43.35 7.1
 -3 -6 -1 38.14 5.4
 -3 -6 -1 32.99 4.99
 -3 -6 -1 42.45 6.39
 3 -6 2 141.56 12.77
 3 -6 2 102.09 9.51
 -3 -6 -2 116.19 10.68
 -3 -6 -2 113.65 9.67
 3 -6 3 30.57 5.83
 3 -6 3 45.5 7.71
 -3 -6 -3 41.89 6.15
 3 -6 4 46.14 7.65
 -3 -6 -4 43.31 6.73
 3 -6 4 39.19 6.87
 3 -6 5 -3.18 2.62
 -3 -6 -5 -4.76 3.1
 3 -6 5 2.08 3.13
 3 -6 6 54.06 8.25
 -3 -6 -6 43.76 7.26
 3 -6 6 39.47 7.63
 3 -6 7 1.95 2.45
 3 -6 7 -2.14 2.89
 -3 -6 -7 -0.7 2.66
 3 -5 -11 -1.62 2.32
 -3 -5 11 -4.06 3.57
 -3 -5 10 44.14 8.01
 3 -5 -10 44.45 7.35
 3 -5 -9 1.16 2.67
 3 -5 -9 3.13 3.03
 -3 -5 9 0.35 2.22
 3 -5 -8 83.38 8.47
 3 -5 -8 86.53 9.66
 -3 -5 8 81.87 9.92
 3 -5 -7 104.55 9.07
 -3 -5 7 106.23 8.03
 -3 -5 7 80.33 9.38
 3 -5 -7 109.45 10.5
 -3 -5 7 105.45 8.39
 -3 -5 6 22.26 4.01
 3 -5 -6 33.27 6.05
 -3 -5 6 22.28 3.77
 -3 -5 6 23.15 5.25
 3 -5 -6 26.46 4.45
 -3 -5 6 23.43 3.4
 3 -5 -5 212.6 11.47
 -3 -5 5 221.78 10.6
 -3 -5 5 217.95 13.99
 3 -5 -5 234.29 14.81
 -3 -5 5 216.12 11.68
 -3 -5 5 211.91 10.01
 -3 -5 4 239.52 10.16
 3 -5 -4 230.9 14.56
 3 -5 -4 246.58 11.44
 -3 -5 4 240.92 10.79
 -3 -5 4 229.16 13.68
 -3 -5 4 265.07 12.94
 3 -5 -3 302.68 11.81
 3 -5 -3 308.96 16.66
 -3 -5 3 286.1 10.09
 -3 -5 3 299.58 14.9
 -3 -5 3 296.49 13.86
 -3 -5 3 301.41 12.45
 3 -5 -2 124.45 10.51
 -3 -5 2 120.29 8.7
 3 -5 -2 106.66 5.16
 -3 -5 2 111.07 4.9
 -3 -5 2 114.18 8.63
 3 -5 -2 128.21 7.41
 -3 -5 2 117.27 7.74
 3 -5 -1 234.22 11.14
 -3 -5 1 223.38 12.2
 3 -5 -1 206.44 13.66
 -3 -5 1 213.18 11.37
 -3 -5 1 222.48 11.22
 -3 -5 1 204.95 10.76
 3 -5 0 19.94 4.83
 -3 -5 0 25.46 3.92
 -3 -5 0 21.83 3.63
 -3 -5 0 17.73 3.44
 3 -5 0 25.04 3.96
 -3 -5 0 24.2 4.21
 -3 -5 -1 165.19 8.9
 3 -5 1 165.54 10.59
 3 -5 1 153.82 12
 -3 -5 -1 146.44 10.02
 3 -5 2 25 5.31
 -3 -5 -2 22.97 4.37
 3 -5 2 22.35 4.39
 -3 -5 -2 24.67 3.24
 -3 -5 -3 68.71 7.67
 3 -5 3 82.63 9.08
 3 -5 4 22.85 5.17
 3 -5 4 29.16 5.53
 -3 -5 -4 21.93 4.83
 3 -5 5 7.61 3.39
 -3 -5 -5 8.54 3.15
 3 -5 5 11.88 4.19
 3 -5 6 39.02 6.64
 -3 -5 -6 33.84 6.15
 3 -5 6 37.11 6.75
 -3 -5 -7 81.23 9.78
 3 -5 7 106.44 10.93
 3 -5 7 86.91 10.45
 -3 -5 -8 4.9 3.25
 3 -5 8 8.83 3.68
 3 -5 8 4.49 3.97
 3 -5 9 33.25 6.75
 3 -4 -12 0.07 2.3
 -3 -4 12 -0.41 2.98
 3 -4 -11 44.17 7.23
 -3 -4 11 39.22 7.67
 3 -4 -10 11.57 3.87
 -3 -4 10 21.51 5.52
 -3 -4 9 58.92 8.26
 3 -4 -9 56.15 7.27
 -3 -4 8 33.31 4.16
 -3 -4 8 43.27 5.04
 -3 -4 8 27.24 5.43
 3 -4 -8 44.13 5.97
 3 -4 -7 26.02 4.88
 -3 -4 7 40.44 4.32
 -3 -4 7 24.73 5.08
 3 -4 -7 31.93 4.82
 -3 -4 7 30.53 3.99
 -3 -4 6 20.07 3.12
 -3 -4 6 22.09 3.28
 3 -4 -6 15.4 3.42
 -3 -4 6 17.08 3.95
 3 -4 -6 22.87 4.4
 -3 -4 5 262.9 11.34
 3 -4 -5 266.17 12.3
 -3 -4 5 244.04 10.85
 3 -4 -5 248.36 13.63
 -3 -4 5 255.16 13.94
 -3 -4 5 246.32 10.81
 3 -4 -4 50.98 4.12
 3 -4 -4 63.91 5.45
 -3 -4 4 59.16 5.04
 3 -4 -4 63.48 6.71
 -3 -4 4 57.41 4.64
 -3 -4 4 58.41 6.22
 -3 -4 4 56.34 5.07
 -3 -4 3 159.91 9.94
 3 -4 -3 163.75 8.16
 3 -4 -3 167.12 7.73
 -3 -4 3 160.26 7.34
 -3 -4 3 169.38 8.77
 3 -4 -3 187.84 11.31
 -3 -4 3 180.45 9.06
 3 -4 -3 156.1 7.41
 3 -4 -2 25.91 4.41
 3 -4 -2 21.27 2.31
 -3 -4 2 19.01 3.06
 3 -4 -2 17.58 2.17
 -3 -4 2 24.09 3.7
 -3 -4 2 19.31 2.2
 3 -4 -2 20.86 2.77
 3 -4 -2 18.15 2.56
 -3 -4 2 24.46 3.41
 3 -4 -1 276.99 7.37
 -3 -4 1 278.52 7.91
 3 -4 -1 290.41 11.64
 -3 -4 1 291.84 12.45
 3 -4 -1 288.05 14.61
 3 -4 -1 284.82 7.41
 -3 -4 1 285.33 12.1
 3 -4 0 337.53 11.06
 -3 -4 0 324.65 7.96
 3 -4 0 342.13 13.75
 3 -4 0 331.75 16.1
 -3 -4 0 357.8 14.18
 -3 -4 0 343.2 14.34
 3 -4 1 375.37 11.43
 3 -4 1 386.78 15.65
 3 -4 1 401.77 18.07
 -3 -4 -1 384.62 15.99
 3 -4 2 421.11 12.31
 3 -4 2 462.65 19.69
 3 -4 2 467.75 18.27
 -3 -4 -2 477.49 18.67
 3 -4 3 53.58 6.47
 3 -4 3 52.39 3.56
 3 -4 3 60.47 7.28
 -3 -4 -3 61.4 6.84
 3 -4 4 295.51 15.85
 3 -4 4 273.86 15.41
 -3 -4 -4 282.92 15.65
 3 -4 5 11.12 3.59
 -3 -4 -5 5.02 2.73
 3 -4 5 5.22 2.95
 3 -4 6 128.66 11.45
 3 -4 6 152.37 11.86
 -3 -4 -6 124.54 11.23
 -3 -4 -7 20.21 5.01
 3 -4 7 20.12 5.02
 3 -4 7 11.48 4.19
 3 -4 8 28.77 6.34
 3 -4 8 22.1 5.09
 -3 -4 -8 21.79 5.86
 3 -4 9 8.03 3.96
 3 -4 9 -1.62 2.63
 -3 -4 -9 7.33 4.03
 3 -4 10 0.69 1.99
 3 -3 -13 6.25 3.66
 -3 -3 13 6.23 3.83
 3 -3 -12 0.56 2.79
 -3 -3 12 3.04 3.2
 3 -3 -11 3.3 2.75
 -3 -3 11 4.48 3.82
 -3 -3 10 1.15 2.05
 3 -3 -10 0.96 2.09
 -3 -3 9 27.74 5.51
 3 -3 -9 24.88 4.72
 3 -3 -8 153.45 10.73
 -3 -3 8 134.06 10.87
 -3 -3 8 140.33 9.25
 -3 -3 8 150.52 7.87
 -3 -3 7 187.16 12.18
 -3 -3 7 196.88 7.97
 3 -3 -7 208.06 11.89
 -3 -3 7 207.9 10.53
 -3 -3 7 202.91 8.79
 3 -3 -6 205.84 11.03
 -3 -3 6 193.38 11.68
 -3 -3 6 199.27 8.18
 -3 -3 6 190.11 9.63
 -3 -3 5 1.69 1.48
 -3 -3 5 1.82 1.13
 -3 -3 5 1.44 1.28
 3 -3 -5 -0.76 1.55
 -3 -3 5 3.58 2.22
 3 -3 -5 1.22 1.68
 3 -3 -4 387.68 13.71
 -3 -3 4 372.01 15.03
 -3 -3 4 363.55 12.43
 3 -3 -4 365.41 14.76
 -3 -3 4 374.94 11.62
 -3 -3 4 390.63 13.4
 3 -3 -3 271.36 10.45
 3 -3 -3 268.56 9.91
 -3 -3 3 264.63 9.62
 3 -3 -3 281.2 12.54
 -3 -3 3 285.67 9.76
 3 -3 -3 261.86 9.7
 -3 -3 3 292.31 11.26
 -3 -3 2 90.02 4.81
 3 -3 -2 88.24 5.43
 3 -3 -2 82.4 4.68
 3 -3 -2 87.89 5.1
 -3 -3 2 83.64 5.21
 3 -3 -2 75.78 6.45
 3 -3 -2 83.11 4.64
 -3 -3 2 79.73 5.7
 3 -3 -1 306.78 9.32
 3 -3 -1 302.56 8.42
 -3 -3 1 298.35 8.82
 3 -3 -1 310.83 11.01
 3 -3 -1 299.43 13.31
 3 -3 -1 287.06 8.25
 3 -3 -1 290.95 10.71
 -3 -3 1 296.1 11.68
 3 -3 0 210.14 9.56
 3 -3 0 199.96 6.59
 3 -3 0 204.29 11
 3 -3 0 197.1 5.6
 -3 -3 0 190.64 6.64
 -3 -3 -1 114.93 5.29
 -3 -3 -1 118.57 8.08
 3 -3 1 117.25 7.62
 3 -3 1 119.41 4.62
 3 -3 1 123.52 8.62
 -3 -3 -2 5.58 2.1
 3 -3 2 7.2 2.77
 3 -3 2 4.92 0.98
 -3 -3 -2 7.13 1.5
 3 -3 2 3.99 1.8
 -3 -3 -2 10.63 1.83
 -3 -3 -3 59.91 4.37
 3 -3 3 52.43 4.02
 3 -3 3 53.85 5.97
 3 -3 3 54.41 6.05
 -3 -3 -3 51.74 6.04
 3 -3 4 211.82 8.73
 3 -3 4 206.66 5.8
 3 -3 4 233.16 12.83
 3 -3 4 216.4 5.68
 3 -3 4 240.75 13.26
 -3 -3 -4 237.79 13.5
 3 -3 5 2.86 2.4
 3 -3 5 0.34 0.65
 -3 -3 -5 3.28 2.34
 3 -3 5 1.71 1
 3 -3 5 2.41 2.43
 3 -3 6 33.33 5.31
 -3 -3 -6 35.23 5.87
 3 -3 6 37.28 5.9
 -3 -3 -6 31.43 3.53
 -3 -3 -7 55.87 7.7
 3 -3 7 70.97 7.92
 3 -3 7 57.26 7.52
 3 -3 8 11.41 3.96
 -3 -3 -8 8.72 3.42
 3 -3 8 14.16 4.1
 3 -3 9 40.18 6.79
 -3 -3 -9 48.47 7.74
 3 -3 9 37.87 6.94
 3 -3 10 9.59 4.15
 -3 -3 -10 8.95 4.45
 -3 -2 14 17.17 5.49
 3 -2 -13 -0.42 2.95
 -3 -2 13 -1.68 2.82
 3 -2 -12 10.34 4.07
 -3 -2 12 9 3.72
 3 -2 -11 16.88 4.55
 -3 -2 11 11.17 3.75
 -3 -2 10 54.48 7.16
 3 -2 -10 47.77 6.61
 3 -2 -9 9.1 3.38
 -3 -2 9 6.98 3
 -3 -2 8 513.47 18.47
 3 -2 -8 518.29 19.74
 3 -2 -8 472.89 13.23
 -3 -2 8 449.64 9.49
 -3 -2 8 503.1 20.03
 3 -2 -7 118.31 8.53
 3 -2 -7 109.24 5.72
 -3 -2 7 113.31 4.29
 -3 -2 7 115.43 8.81
 -3 -2 7 115.39 7.83
 -3 -2 6 753.42 21.19
 -3 -2 6 755.07 22.93
 3 -2 -6 753 22.23
 -3 -2 6 738.45 16.17
 -3 -2 6 734.58 15.33
 -3 -2 5 365.18 9.91
 -3 -2 5 370.88 13.23
 -3 -2 5 369.68 14.43
 -3 -2 5 378.52 13.24
 -3 -2 5 374.88 9.39
 3 -2 -5 376.31 13.86
 -3 -2 4 261.97 7.14
 3 -2 -4 250.48 10.31
 3 -2 -4 256.18 9.71
 -3 -2 4 252.92 8.26
 -3 -2 4 252.47 9.82
 3 -2 -4 280.96 10.84
 -3 -2 4 267.34 10.42
 -3 -2 3 1085.91 19.85
 -3 -2 3 1074.09 23.25
 3 -2 -3 1118.11 23.77
 -3 -2 3 1079.5 22.41
 3 -2 -3 1094.56 25.02
 3 -2 -3 1019.36 23.68
 -3 -2 3 1091.41 24.89
 3 -2 -3 1017.22 23.14
 -3 -2 3 1132.37 25.02
 -3 -2 2 632.64 15.38
 3 -2 -2 639.51 17.73
 -3 -2 2 613.79 17.16
 3 -2 -2 652.22 15.57
 3 -2 -2 630.5 16.31
 -3 -2 2 634.4 15.94
 3 -2 -2 645.18 15.64
 -3 -2 2 655.23 17.45
 -3 -2 1 3895.48 64.41
 3 -2 -1 4056.5 67.38
 -3 -2 1 4106.74 68.8
 3 -2 -1 3895.03 63.83
 -3 -2 1 4004.84 66.62
 3 -2 -1 4153.31 66.71
 3 -2 -1 3959.42 69.4
 3 -2 -1 4052.42 64.08
 -3 -2 1 4146.98 68.87
 3 -2 0 46.37 4.02
 3 -2 0 51.84 3.14
 3 -2 0 52.43 4.25
 -3 -2 0 56.23 3.58
 -3 -2 -1 422.68 11.95
 3 -2 1 409.7 13.99
 3 -2 1 410.72 10.76
 3 -2 1 440.99 15.11
 -3 -2 -2 331.09 13.78
 -3 -2 -2 327.67 11.22
 3 -2 2 323.13 12.97
 3 -2 2 308.66 12.8
 3 -2 3 889.11 15.96
 -3 -2 -3 925.94 22.96
 -3 -2 -3 888.23 21.21
 3 -2 3 904.04 21.87
 3 -2 3 920.13 25.38
 -3 -2 -3 944.02 26.48
 3 -2 3 963.38 25.55
 3 -2 4 725.37 15.3
 3 -2 4 703.25 19.49
 -3 -2 -4 724.99 23.71
 3 -2 4 717.93 23.11
 3 -2 4 758.65 22.93
 3 -2 5 253.5 8.8
 3 -2 5 241.36 11.04
 3 -2 5 253.72 13.56
 -3 -2 -5 280.33 14.64
 3 -2 5 273.55 13.58
 3 -2 6 145.56 7.28
 -3 -2 -6 150.45 8.44
 3 -2 6 148.14 10.8
 3 -2 6 150.64 10.58
 -3 -2 -6 150.03 11.18
 3 -2 7 50.16 6.52
 -3 -2 -7 51.57 6.98
 3 -2 7 45.75 4.49
 -3 -2 -7 47.9 5
 3 -2 7 39.39 5.98
 -3 -2 -8 0.57 1.4
 3 -2 8 2.17 1.62
 -3 -2 -8 -0.52 2.95
 3 -2 8 1.69 1.66
 3 -2 8 0.42 2.28
 -3 -2 -9 41.91 7.18
 3 -2 9 33.23 4.75
 3 -2 9 22.26 5.43
 3 -2 10 6.91 3.58
 -3 -2 -10 2.27 2.45
 3 -2 11 12.31 4.34
 -3 -2 -11 25.66 6.41
 -3 -1 14 2.12 2.35
 3 -1 -14 2.49 3.03
 3 -1 -13 22.94 5.42
 -3 -1 13 18.75 4.75
 3 -1 -12 20.65 4.91
 -3 -1 12 20.2 4.8
 3 -1 -11 92.31 6.78
 3 -1 -11 95.47 9.48
 -3 -1 11 81.8 8.62
 3 -1 -10 9.01 2.2
 3 -1 -10 5.68 2.93
 -3 -1 10 8.47 3.18
 -3 -1 9 0.6 1.67
 3 -1 -9 1.12 1.56
 3 -1 -9 -0.92 1.34
 3 -1 -8 345.77 15.3
 3 -1 -8 317.73 7.75
 -3 -1 8 320.01 14.59
 3 -1 -8 335.06 11.35
 -3 -1 7 201.07 8.44
 3 -1 -7 231.85 8.71
 3 -1 -7 207.67 6.15
 3 -1 -7 237.44 11.8
 -3 -1 7 241.78 11.7
 -3 -1 7 223.9 11.19
 -3 -1 6 160.66 7.46
 3 -1 -6 170.36 5.54
 -3 -1 6 180.33 9.24
 -3 -1 6 168.53 9.12
 3 -1 -5 70.11 5.56
 -3 -1 5 66.08 5.2
 -3 -1 5 66.26 5.16
 3 -1 -4 232.87 9.05
 -3 -1 4 218.33 9.09
 -3 -1 4 220.23 9.02
 3 -1 -4 219.52 9.35
 -3 -1 4 223.16 5.95
 3 -1 -4 227.88 8.09
 -3 -1 4 226.15 9.36
 3 -1 -3 1784.12 34.5
 -3 -1 3 1794.78 34.3
 -3 -1 3 1885.4 35.74
 -3 -1 3 1840.8 30.79
 3 -1 -3 1785.46 34.8
 3 -1 -3 1812.41 32.89
 3 -1 -3 1779.13 34.6
 -3 -1 3 1821.77 35.28
 -3 -1 3 1855.69 34.46
 3 -1 -2 257.5 8.91
 -3 -1 2 275.1 9.2
 -3 -1 2 249.08 8.69
 3 -1 -2 250.16 9.08
 -3 -1 2 248.28 9.39
 3 -1 -2 240.08 8.78
 3 -1 -2 263.4 8.68
 -3 -1 2 245.67 7.72
 -3 -1 2 261.19 5.74
 -3 -1 2 252.46 9.47
 -3 -1 2 288.84 9.51
 -3 -1 1 3696.24 61.3
 -3 -1 1 3417.55 58.51
 3 -1 -1 3659.26 60.11
 -3 -1 1 3677.61 59.42
 3 -1 -1 3617.91 58.98
 -3 -1 1 3696.79 61.64
 3 -1 -1 3742.27 60.83
 3 -1 -1 3528.95 59.03
 -3 -1 1 3799.32 61.7
 -3 -1 1 3473.19 60.07
 -3 -1 0 822.27 19.92
 -3 -1 0 790.1 18.98
 -3 -1 0 776.92 18.05
 3 -1 0 794.81 17.53
 3 -1 0 817.95 18.87
 3 -1 0 775.39 19.29
 -3 -1 0 780.78 18.5
 -3 -1 0 803.3 18.06
 3 -1 0 799.54 18.95
 -3 -1 0 840.81 18.82
 -3 -1 -1 732.98 17.85
 -3 -1 -1 739.25 18.39
 3 -1 1 748.13 18.6
 -3 -1 -1 698.16 17.47
 3 -1 1 716.96 18.42
 3 -1 1 704.67 16.93
 3 -1 2 169.9 5.33
 -3 -1 -2 167.06 8.09
 3 -1 2 155.96 7.72
 3 -1 2 170.49 5.04
 -3 -1 -2 164.32 7.47
 3 -1 2 185.3 8.73
 -3 -1 -2 177.31 7.92
 3 -1 2 179.72 8.53
 3 -1 3 105.2 4.78
 -3 -1 -3 97.85 6.65
 3 -1 3 109.33 6.73
 3 -1 3 111.31 4.79
 3 -1 3 111.85 7.25
 -3 -1 -3 100.62 7.43
 3 -1 3 104.62 6.88
 3 -1 4 897.85 20.03
 -3 -1 -4 887.02 21.08
 -3 -1 -4 935.73 26.57
 3 -1 4 913.07 24.04
 3 -1 4 891.31 20.01
 3 -1 4 892.05 24.8
 3 -1 4 919.23 24.86
 -3 -1 -5 45.94 4.77
 -3 -1 -5 40.76 3.62
 3 -1 5 42.66 3.91
 3 -1 5 47.31 5.2
 3 -1 5 46.59 5.34
 3 -1 5 52.64 4.3
 3 -1 5 52.52 5.73
 -3 -1 -5 48.13 5.84
 3 -1 6 469.93 15.7
 3 -1 6 485.38 15.64
 -3 -1 -6 457.32 13.36
 -3 -1 -6 496.01 17.22
 3 -1 6 478.02 18.79
 -3 -1 -6 501.86 20.35
 3 -1 7 165.39 9.47
 3 -1 7 170.41 9.47
 -3 -1 -7 164.46 11.91
 3 -1 7 181.58 9.82
 -3 -1 -7 166.28 10.05
 3 -1 7 180.44 11.71
 -3 -1 -8 31.23 5.57
 3 -1 8 24.91 4.2
 3 -1 8 34.03 4.67
 -3 -1 -8 31.87 4.75
 3 -1 8 34.47 4.48
 3 -1 8 38.41 5.85
 3 -1 9 12 3.26
 3 -1 9 15.94 3.37
 3 -1 9 19.74 4.6
 3 -1 9 15.97 3.58
 -3 -1 -9 21.73 4.28
 -3 -1 -9 13.69 3.94
 3 -1 10 53.02 6.77
 -3 -1 -10 52.75 6.55
 -3 -1 -10 43.09 7.29
 3 -1 10 43.9 6.87
 3 -1 11 4.84 3.09
 -3 -1 -11 2.66 2.88
 3 -1 12 19.84 5.13
 -3 0 14 21.86 5.57
 3 0 -14 27.08 6.12
 3 0 -13 30.77 4.79
 -3 0 13 14.62 4.08
 3 0 -13 22.4 5.21
 3 0 -12 49.5 7.36
 -3 0 12 41.07 6.06
 3 0 -12 41.83 5.39
 3 0 -11 57.3 5.87
 -3 0 11 60.06 6.88
 3 0 -11 44.51 6.56
 3 0 -10 35.4 4.42
 3 0 -10 46.64 6.25
 -3 0 10 37.18 5.14
 -3 0 9 15.57 1.82
 3 0 -9 18.26 3.09
 3 0 -9 14.2 1.8
 3 0 -9 15.8 3.65
 -3 0 9 11.46 2.99
 3 0 -8 475.96 15.27
 3 0 -8 463.1 12.17
 -3 0 8 435.03 16.05
 3 0 -8 441.26 17.34
 3 0 -7 111.07 7.87
 3 0 -7 115.63 6.67
 -3 0 7 107.17 6.97
 -3 0 7 118.58 8.14
 3 0 -7 116.03 5.45
 3 0 -6 763.59 21.73
 3 0 -6 825.52 19.58
 -3 0 6 783.6 21.49
 -3 0 6 777.59 21.83
 -3 0 6 778.6 20.21
 -3 0 5 88.77 5.88
 -3 0 5 92.64 5.43
 3 0 -5 105.39 5.66
 -3 0 5 101.79 6.43
 3 0 -5 106.37 6.59
 -3 0 4 323.45 11.03
 3 0 -4 321.78 11.57
 -3 0 4 303.32 9.83
 -3 0 4 324.31 11.22
 3 0 -4 292.03 11
 3 0 -3 339.77 10.69
 -3 0 3 299.45 10.37
 3 0 -3 327.1 11.04
 -3 0 3 338.16 10
 -3 0 3 334.25 10.85
 -3 0 3 307.05 10.55
 3 0 -3 320.42 10.94
 3 0 -3 330.86 7.23
 3 0 -2 50.22 3.68
 -3 0 2 47.98 3.68
 -3 0 2 50.01 3.71
 3 0 -2 50.62 3.87
 -3 0 2 49.08 2.51
 3 0 -2 52.51 2.49
 -3 0 2 49 3.74
 3 0 -2 50.87 3.85
 3 0 -1 5273.59 80.57
 -3 0 1 5047.42 80.6
 -3 0 1 5014.81 77.45
 3 0 -1 5042.63 80.53
 -3 0 1 4987.56 80.31
 3 0 -1 5013.74 76.99
 -3 0 1 5025.01 80.54
 3 0 -1 4944.48 80.5
 -3 0 0 2.71 0.7
 -3 0 0 2.65 1.16
 -3 0 0 1.13 0.59
 3 0 0 2.43 0.9
 -3 0 0 2.65 1.11
 -3 0 0 2.42 0.77
 -3 0 0 3.51 1.09
 3 0 0 1.03 0.79
 3 0 0 1.28 0.83
 -3 0 -1 412.64 12.59
 3 0 1 371.7 10.26
 -3 0 -1 384.19 10.42
 -3 0 -1 391.74 12.46
 3 0 1 402.11 12.4
 3 0 1 386.23 12.34
 -3 0 -1 380.41 9.65
 -3 0 -1 391.2 11.99
 3 0 1 367.82 9.61
 -3 0 -1 410.34 11.9
 3 0 1 394.7 11.55
 3 0 2 139.24 6.12
 -3 0 -2 142.83 5.83
 -3 0 -2 137.09 6.04
 3 0 2 138.61 7.66
 3 0 2 143.69 7.05
 -3 0 -2 145.21 7.83
 3 0 2 143.39 5.81
 3 0 2 142.41 7.17
 3 0 3 317.17 10.63
 3 0 3 315.48 11.04
 -3 0 -3 303.2 10.36
 3 0 3 314.21 10.17
 3 0 3 317.65 12.76
 3 0 3 316.28 11.69
 -3 0 -3 310.37 12.52
 -3 0 -3 316.02 12.94
 3 0 4 219.51 11.16
 3 0 4 220.35 9.4
 3 0 4 218.86 10.17
 3 0 4 228.09 9.68
 -3 0 -4 222.69 11.16
 3 0 4 217.69 9.1
 3 0 4 238.44 7.89
 -3 0 -5 608.16 19.57
 3 0 5 600.97 18.06
 3 0 5 582.84 17.56
 3 0 5 627.38 20.99
 3 0 5 624.71 17.99
 3 0 5 577.57 18.72
 3 0 5 597.53 14.18
 -3 0 -5 600.79 20.27
 3 0 6 2.27 1.71
 -3 0 -6 -0.45 2.17
 3 0 6 1.94 0.88
 3 0 6 1.35 1.45
 -3 0 -6 1.52 1.77
 3 0 6 1.91 1.56
 3 0 6 0.75 1.49
 -3 0 -7 91.45 7.92
 3 0 7 104.07 7.89
 3 0 7 100.01 7.72
 3 0 7 109.13 7.5
 3 0 7 104.4 8.33
 -3 0 -7 92.36 8.55
 -3 0 -8 147.64 10.56
 3 0 8 128.55 8.51
 3 0 8 137.15 9.8
 3 0 8 139.92 9.9
 3 0 8 140.44 10.12
 -3 0 -8 133.74 10.74
 3 0 9 35.21 5.37
 3 0 9 45.82 6.23
 3 0 9 33.27 5.1
 -3 0 -9 30.26 5.21
 3 0 9 35.35 4.68
 -3 0 -9 31.17 5.68
 3 0 10 6.02 3
 3 0 10 2.28 2.32
 -3 0 -10 1.4 2.47
 -3 0 -10 3.66 2.21
 3 0 10 1.35 1.68
 3 0 10 2.8 2.25
 3 0 11 18.57 4.43
 3 0 11 7.83 3.18
 -3 0 -11 1.11 2.56
 -3 0 -11 11.34 3.44
 3 0 11 18.09 4.29
 -3 0 -12 4.04 3.23
 3 1 -15 2.09 2.78
 -3 1 14 1.79 2.52
 -3 1 14 6.04 3.69
 -3 1 14 -0.94 2.04
 3 1 -14 -1.83 2.01
 3 1 -14 0.76 2.14
 -3 1 13 23.57 5.77
 3 1 -13 15.57 3.83
 3 1 -13 20.63 5.15
 -3 1 12 22.92 5.54
 3 1 -12 23.62 4.35
 3 1 -12 22.77 5.14
 3 1 -11 70.68 7.84
 3 1 -11 96.75 8.24
 -3 1 11 83.24 7.12
 3 1 -10 8.49 3.29
 3 1 -10 11.02 3.05
 -3 1 10 9.78 2.65
 -3 1 9 2.37 1.96
 -3 1 9 0.45 0.66
 3 1 -9 2.43 2.06
 3 1 -9 1.91 0.92
 3 1 -9 1.61 1.7
 -3 1 9 1.8 1.47
 -3 1 8 317.93 10.04
 3 1 -8 325.16 14.38
 -3 1 8 351.68 14.74
 3 1 -8 318.99 10.59
 -3 1 8 322.45 12.12
 3 1 -7 207.41 10.62
 3 1 -7 240.25 10.69
 -3 1 7 234.52 11.14
 -3 1 7 222.66 9.08
 3 1 -7 220.46 8.61
 -3 1 7 227.65 9.28
 3 1 -7 212.97 7.96
 3 1 -6 148.82 8.34
 -3 1 6 152.7 6.74
 3 1 -6 161.8 7.24
 3 1 -6 156.65 5.72
 -3 1 6 158.75 8.54
 3 1 -5 65.14 4.82
 3 1 -5 67.58 2.94
 -3 1 5 63.75 4.93
 3 1 -5 62.18 5.15
 -3 1 5 75.87 5.58
 3 1 -5 69.13 4.61
 -3 1 5 69.47 4.09
 -3 1 4 224.17 9.12
 -3 1 4 237.49 9.43
 3 1 -4 232.26 9.72
 3 1 -4 222.73 8.88
 -3 1 4 236.87 7.73
 3 1 -4 229.84 6.15
 3 1 -4 236.87 8.79
 3 1 -3 1835.88 35.6
 3 1 -3 1850.14 34.17
 -3 1 3 1795.77 34.44
 -3 1 3 1870.59 34.86
 3 1 -3 1852.76 30.95
 3 1 -3 1736.93 34.11
 -3 1 3 1818.19 34.12
 3 1 -3 1735.97 35.16
 3 1 -2 259.71 8.64
 -3 1 2 241.34 8.8
 3 1 -2 237.06 9.13
 -3 1 2 249.93 8.58
 3 1 -2 260.61 9.44
 3 1 -2 237.43 7.47
 3 1 -2 241.1 8.82
 -3 1 2 236.1 8.07
 -3 1 2 243.93 8.36
 3 1 -1 3706.44 61.99
 -3 1 1 3710.94 59.69
 -3 1 1 3597.95 60.95
 3 1 -1 3716.37 59.44
 3 1 -1 3870.36 60.19
 -3 1 1 3750.98 60.48
 -3 1 1 3773.33 60.67
 -3 1 1 3538.08 59.36
 3 1 0 808.21 18.97
 -3 1 0 755.92 13.98
 3 1 0 824.53 19.68
 3 1 0 806.51 17.83
 -3 1 0 760.63 17.25
 3 1 0 756.12 17.67
 3 1 0 813.37 18.64
 -3 1 0 790.69 18.92
 -3 1 0 791.94 18.9
 -3 1 0 804.1 19.29
 -3 1 0 801.75 17.38
 -3 1 -1 737.72 19.27
 3 1 1 735.1 18.13
 -3 1 -1 688.26 12.88
 3 1 1 705.88 19.11
 3 1 1 737.21 19.73
 3 1 1 731.11 17.39
 3 1 1 752.42 17.73
 3 1 1 708.39 17.6
 3 1 1 745.01 17.58
 -3 1 -1 726.68 17.06
 3 1 2 168.44 7.94
 3 1 2 163.97 7.54
 -3 1 -2 169.01 7.6
 3 1 2 161.09 8.85
 3 1 2 164.62 7.72
 -3 1 -2 162.59 8.69
 3 1 2 172.03 7.73
 3 1 2 164.17 7.16
 -3 1 -3 110.24 7.32
 3 1 3 96.69 6.38
 3 1 3 99.51 6.25
 3 1 3 95.05 7.2
 3 1 3 109.08 5.73
 -3 1 -3 103.04 7.46
 3 1 3 100.47 6.15
 -3 1 -3 103.49 6.42
 3 1 4 910.3 23.89
 -3 1 -4 894.63 24.95
 3 1 4 911.84 26.31
 3 1 4 849.66 20.06
 3 1 4 918.88 22.72
 3 1 4 872.41 23.05
 -3 1 -4 881.42 23.24
 3 1 5 48.77 4.82
 3 1 5 49.18 5.24
 3 1 5 49.21 5.1
 3 1 5 49.53 3.88
 3 1 5 50.62 6.21
 -3 1 -5 56.43 5.92
 -3 1 -5 42.99 4.91
 -3 1 -6 464.69 12.96
 3 1 6 493.03 18.42
 3 1 6 474.92 17.83
 -3 1 -6 474.18 18.99
 3 1 6 488.38 16.68
 3 1 6 485.35 16.37
 3 1 6 468.22 12.92
 -3 1 -6 500.54 18.2
 3 1 7 155.96 10.56
 3 1 7 157.7 10.45
 -3 1 -7 148.95 6.33
 -3 1 -7 162 11.22
 3 1 7 176.82 9.96
 3 1 7 163.01 9.51
 -3 1 -7 159.71 10.5
 3 1 8 34.62 5.38
 3 1 8 21.89 4.46
 3 1 8 25.53 3.96
 -3 1 -8 18.62 4.37
 3 1 8 36.34 4.77
 -3 1 -8 25.45 4.51
 3 1 9 19.7 4.37
 3 1 9 16.28 3.59
 3 1 9 26.02 5.07
 -3 1 -9 18.21 4.52
 3 1 9 16.31 3.54
 -3 1 -9 18.16 4.41
 3 1 10 48.38 7.09
 -3 1 -10 48.26 6.9
 -3 1 -10 37.52 6.31
 3 1 10 43.25 5.62
 3 1 10 49.57 7.1
 3 1 10 58.9 6.59
 3 1 11 6.23 3.42
 3 1 11 8.39 3.87
 -3 1 -11 6.94 3.36
 -3 1 -11 2.87 2.3
 3 1 12 2.72 2.29
 3 1 12 1.9 2.71
 -3 1 -12 8.35 3.97
 -3 1 -12 8.34 3.59
 -3 2 14 6.74 4
 3 2 -14 13.38 4.04
 3 2 -14 16.52 4.72
 -3 2 13 -1.98 2.21
 -3 2 13 0.82 2.29
 -3 2 13 1.98 2.93
 3 2 -13 -3.36 2.26
 3 2 -13 -1.33 2.19
 -3 2 12 9.61 4.18
 -3 2 12 5.11 3.05
 -3 2 12 5.47 2.83
 3 2 -12 3.47 2.07
 3 2 -12 5.1 2.88
 -3 2 11 22.29 5.17
 -3 2 11 7.55 3.57
 -3 2 11 12.93 3.76
 3 2 -11 17.12 4.06
 3 2 -11 9.62 3.18
 -3 2 10 52.15 7.03
 -3 2 10 52.48 7.01
 3 2 -10 58.83 6.58
 3 2 -10 41.78 5.73
 -3 2 10 39.83 5.56
 -3 2 9 10.86 3.38
 -3 2 9 9.62 1.99
 -3 2 9 8.94 2.81
 -3 2 9 10.24 3.37
 3 2 -9 10.24 2.09
 3 2 -9 9.47 3.21
 -3 2 9 10.82 2.11
 3 2 -9 10.77 2.94
 -3 2 8 499.55 15.06
 3 2 -8 504.33 15.39
 3 2 -8 526.47 18.82
 -3 2 8 514.71 19.76
 -3 2 8 477.59 13.54
 3 2 -8 502.94 18.82
 -3 2 8 491.9 17.86
 -3 2 8 502.1 13.85
 3 2 -7 112.11 6.76
 -3 2 7 115.81 7.67
 -3 2 7 115.19 5.46
 -3 2 7 114.71 5.48
 3 2 -7 130.56 8.61
 -3 2 7 119.43 6.78
 3 2 -7 111.68 5.94
 3 2 -7 122.95 8.2
 3 2 -6 750.27 21.37
 3 2 -6 728.64 19.74
 -3 2 6 729.33 20.4
 -3 2 6 722.22 15.67
 3 2 -6 751.03 21.41
 3 2 -6 728.84 16.46
 -3 2 6 744.41 19.33
 -3 2 5 369.59 12.43
 -3 2 5 339.24 12.3
 3 2 -5 363.13 12.88
 3 2 -5 364.75 13.28
 3 2 -5 350.45 13.15
 -3 2 5 352.28 9.3
 3 2 -5 369.67 9.39
 -3 2 4 230.73 9.4
 -3 2 4 249.07 9.92
 3 2 -4 249.57 10.31
 3 2 -4 253.63 10.44
 3 2 -4 251.85 10.33
 -3 2 4 261.13 9.94
 -3 2 3 1137.17 24.19
 -3 2 3 1058.04 23.56
 -3 2 3 1042.83 22.92
 3 2 -3 1088.95 24.83
 3 2 -3 1134.52 25.9
 3 2 -3 1095.69 24.7
 -3 2 3 1087.98 23.09
 3 2 -3 1126.26 22.68
 -3 2 3 1088.4 21.59
 3 2 -3 1103.81 24.89
 -3 2 2 645.57 14.75
 -3 2 2 639.87 14.63
 -3 2 2 606.65 16.16
 3 2 -2 638.51 15.93
 -3 2 2 662.88 15.81
 -3 2 2 672.34 15.81
 3 2 -2 672.61 15.42
 3 2 -2 670.21 18.33
 -3 2 2 632.94 14.93
 3 2 -2 650.51 17.29
 3 2 -2 632.1 17.12
 3 2 -1 4231.86 71.49
 -3 2 1 4142.19 63.14
 3 2 -1 4091.87 65.72
 3 2 -1 4072.75 69.35
 -3 2 1 4072.3 68.3
 3 2 -1 4038.7 69.53
 3 2 -1 4074.92 68.17
 -3 2 1 4043.32 65.67
 3 2 -1 4103.48 70.48
 -3 2 1 4120.94 68.27
 -3 2 1 4107.4 62.99
 -3 2 1 4139.34 64.64
 3 2 0 50.35 4.56
 3 2 0 47.85 4.46
 3 2 0 55.2 4.72
 3 2 0 55.62 4.33
 -3 2 0 55.13 4.45
 3 2 0 57.45 3.64
 -3 2 0 56.5 3.26
 3 2 0 48.89 4.45
 -3 2 0 52.66 3.16
 -3 2 -1 412.75 14.21
 3 2 1 410.62 14.39
 3 2 1 417.92 14.67
 3 2 1 429.15 15.07
 3 2 1 425.32 11.59
 -3 2 -1 420.18 10.73
 3 2 1 434.18 14.11
 3 2 1 402.21 13.37
 3 2 1 407.43 14.15
 -3 2 -1 413.55 10.68
 3 2 2 329.68 10.78
 3 2 2 332.71 13.16
 3 2 2 325.28 12.86
 -3 2 -2 324.33 13.19
 3 2 2 339.26 14.16
 -3 2 -2 329.6 10.15
 3 2 2 362.52 12.71
 3 2 2 340.29 12.25
 -3 2 -2 338.71 13.74
 3 2 3 953.16 25.51
 -3 2 -3 942.54 26.01
 3 2 3 904.22 22.87
 -3 2 -3 940.69 26.32
 3 2 3 932.26 26.86
 -3 2 -3 915.5 21.31
 3 2 3 956.4 24.08
 3 2 3 911.29 24.71
 -3 2 -3 928.85 22.67
 -3 2 -3 914.44 21.22
 3 2 4 692.13 22.16
 3 2 4 702.93 21.88
 3 2 4 681.01 18.96
 -3 2 -4 713.06 23.03
 -3 2 -4 704.91 19.06
 3 2 4 755.46 21.15
 -3 2 -4 709.13 18.88
 3 2 4 746.43 24.38
 3 2 5 278.96 12.37
 3 2 5 252.82 13.19
 3 2 5 264.16 10.53
 3 2 5 257.56 12.99
 -3 2 -5 242.91 10.18
 -3 2 -5 274.51 14.15
 -3 2 -5 260.9 11.15
 3 2 6 137.68 7.39
 3 2 6 158.52 10.81
 3 2 6 160.04 10.63
 -3 2 -6 172.62 11.67
 3 2 6 140.85 9.14
 -3 2 -6 138.77 7.46
 -3 2 -6 155.98 9.07
 -3 2 -7 47.29 5.28
 3 2 7 38.48 5.74
 -3 2 -7 45.09 4.07
 -3 2 -7 46.04 6.48
 3 2 7 35.46 4.83
 3 2 7 51.03 6.58
 3 2 8 4.55 2.89
 -3 2 -8 1.69 1.66
 3 2 8 3.7 2.14
 3 2 8 -3.98 2.69
 -3 2 -8 0.75 2.22
 3 2 9 33.01 6.02
 3 2 9 34.6 5.12
 3 2 9 33.53 5.98
 -3 2 -9 29.52 4.91
 -3 2 -9 27.01 5.41
 3 2 10 9.05 3.73
 3 2 10 0.34 1.94
 -3 2 -10 4.09 2.69
 -3 2 -10 3.49 2.31
 3 2 10 -3.42 2.17
 3 2 11 16.21 4.84
 -3 2 -11 19.39 4.99
 3 2 11 16.61 5.16
 3 2 12 3.01 2.78
 -3 3 13 14.67 4.45
 -3 3 13 12.73 4.81
 3 3 -13 11.68 4.16
 -3 3 13 11.05 4.26
 3 3 -13 10.73 3.87
 -3 3 12 3.39 2.56
 -3 3 12 4.64 2.66
 3 3 -12 6.65 3.12
 3 3 -12 2.27 2.45
 -3 3 12 0.76 2.25
 -3 3 11 3.82 2.52
 -3 3 11 -2.07 2.46
 -3 3 11 0.45 1.76
 3 3 -11 5.04 2.74
 3 3 -11 -1.72 2.12
 -3 3 10 7.44 3.45
 -3 3 10 0.58 1.73
 3 3 -10 -0.06 1.73
 -3 3 10 5.46 2.85
 3 3 -10 -2.58 2.36
 3 3 -9 27.75 3.86
 -3 3 9 24.54 4.71
 -3 3 9 27.41 5.08
 3 3 -9 24.05 4.19
 -3 3 9 23.2 3.56
 -3 3 9 25.87 4.11
 3 3 -9 23.05 4.34
 3 3 -8 141.54 8.55
 -3 3 8 144.61 10.73
 -3 3 8 141.64 8.64
 -3 3 8 132.93 8.77
 3 3 -8 137.86 9.37
 -3 3 8 152.37 10.9
 3 3 -8 167.24 10.85
 3 3 -7 200.25 10.33
 -3 3 7 213 12.09
 -3 3 7 210.64 11.97
 -3 3 7 214.74 10.61
 -3 3 7 195.21 4.92
 -3 3 7 191.35 9.92
 3 3 -7 214.21 11.03
 3 3 -7 226.93 12.06
 -3 3 7 185.18 4.51
 3 3 -6 194.18 10.19
 -3 3 6 207.69 11.22
 -3 3 6 183.57 5.17
 -3 3 6 201.86 9.59
 3 3 -6 188.78 9.87
 -3 3 6 197.25 10.24
 -3 3 6 202.27 11.02
 -3 3 6 184.78 5.1
 3 3 -6 208.15 8.35
 -3 3 6 194.46 5.25
 3 3 -6 185.12 10.52
 -3 3 5 3.68 1.77
 -3 3 5 -0.01 1.25
 3 3 -5 1.08 1.64
 -3 3 5 2.58 1.63
 3 3 -5 1.3 1.42
 -3 3 5 0.34 1.12
 3 3 -5 -0.13 1.78
 -3 3 5 0.85 0.56
 -3 3 5 2.16 0.64
 3 3 -5 1.03 0.86
 -3 3 4 396.07 13.82
 -3 3 4 377.74 13.42
 3 3 -4 353.01 14.25
 -3 3 4 369.27 14.2
 3 3 -4 376.23 13.95
 -3 3 4 358.67 11.97
 -3 3 4 343.22 9.62
 3 3 -4 358.08 12.85
 -3 3 3 274.28 10.3
 3 3 -3 268.93 9.64
 -3 3 3 262.35 10.32
 -3 3 3 237.85 11.35
 -3 3 3 280.09 9.98
 3 3 -3 270.92 11.16
 3 3 -3 266.25 10.6
 -3 3 3 267.37 8.91
 3 3 -3 257.34 11.98
 3 3 -2 86.57 5.83
 -3 3 2 93.48 5.1
 -3 3 2 85.24 5.16
 -3 3 2 97.28 5.55
 3 3 -2 104.56 6.41
 -3 3 2 92.43 5.15
 3 3 -2 87.88 6.78
 3 3 -2 86.6 5.59
 -3 3 2 96.5 5.58
 -3 3 2 92.83 6.86
 -3 3 2 85.72 5.33
 3 3 -1 266.79 12.23
 -3 3 1 284.7 8.47
 -3 3 1 272.8 8.23
 -3 3 1 284.07 10.76
 3 3 -1 270.15 12.15
 -3 3 1 270.47 11.94
 3 3 -1 288.4 11.34
 -3 3 1 245.25 8.59
 3 3 -1 265.41 10.94
 3 3 -1 253.96 10.63
 -3 3 1 265.28 7.35
 -3 3 1 258.52 10.11
 -3 3 0 210.1 9.83
 3 3 0 187.41 10.24
 -3 3 0 191.69 5.62
 3 3 0 193.79 9.63
 3 3 0 203.29 10.48
 -3 3 0 219.41 10.6
 3 3 0 205.77 10.05
 -3 3 0 207.12 9.39
 -3 3 0 206.46 6.43
 3 3 0 216.24 6.77
 -3 3 0 203.68 5.45
 3 3 0 204.73 9.71
 -3 3 -1 129.42 4.09
 3 3 1 122.76 8.17
 3 3 1 124.44 8.36
 -3 3 -1 135.33 8.24
 3 3 1 117.41 7.88
 -3 3 -1 129.45 8.13
 3 3 1 116.27 5.13
 -3 3 -1 133.75 7.96
 3 3 1 121.88 7.68
 3 3 1 131.85 8.72
 -3 3 -1 128.9 4.06
 -3 3 -2 4.75 0.92
 -3 3 -2 3.01 1.8
 3 3 2 5.22 1.91
 -3 3 -2 6.67 1.07
 3 3 2 4.42 2.13
 3 3 2 6 2.21
 3 3 2 6.62 1.33
 3 3 2 6.1 1.95
 -3 3 -2 3.65 2.07
 -3 3 -2 4.89 1.7
 3 3 2 2.7 1.77
 -3 3 -2 4.28 0.93
 -3 3 -3 56.59 3.54
 3 3 3 57.74 6.1
 3 3 3 53.71 5.35
 -3 3 -3 63.03 5.78
 -3 3 -3 51.51 5.88
 3 3 3 57.91 6.42
 3 3 3 50.21 3.95
 3 3 3 57.78 5.64
 3 3 3 65.21 6.4
 -3 3 -3 53.29 3.44
 3 3 4 241.77 11.39
 3 3 4 240.84 13.26
 -3 3 -4 230.44 8.83
 -3 3 -4 226.03 11.12
 -3 3 -4 225.67 12.89
 3 3 4 242.8 12.08
 3 3 4 220.72 12.54
 -3 3 -4 229.44 8.48
 -3 3 -5 2.75 1.32
 3 3 5 0.42 1.2
 3 3 5 1.61 1.84
 3 3 5 1.72 1.9
 -3 3 -5 0.86 1.35
 3 3 5 2.62 2.3
 -3 3 -5 -0.93 2.53
 3 3 6 41.87 4.74
 -3 3 -6 35.41 3.87
 3 3 6 33.84 5.6
 3 3 6 38.06 5.82
 3 3 6 42.65 5.44
 -3 3 -6 42.84 4.79
 -3 3 -6 47.78 6.62
 -3 3 -7 64.65 5.61
 3 3 7 53.26 6.26
 3 3 7 52.82 7.1
 3 3 7 56.62 7.52
 -3 3 -7 56.79 7.53
 -3 3 -7 56.81 5.43
 3 3 8 4.18 2.21
 -3 3 -8 11.9 3.72
 3 3 8 12.39 3.91
 3 3 8 8.2 3.56
 3 3 9 40.71 6.91
 3 3 9 42.86 7.07
 -3 3 -9 36.45 6.68
 3 3 9 35.42 5.52
 3 3 10 3.52 2.99
 -3 3 -10 6.43 3.61
 3 3 10 -1.14 3.14
 3 3 10 2.94 2.4
 3 3 11 6.11 3.48
 -3 4 12 1.12 3.04
 -3 4 12 2.22 2.65
 3 4 -12 -1.56 2.08
 -3 4 11 57.1 8.2
 -3 4 11 41.43 7.32
 3 4 -11 52.03 7.58
 -3 4 10 26.21 5.47
 -3 4 10 16.31 5.03
 3 4 -10 15.93 3.75
 -3 4 10 13.75 3.36
 3 4 -10 16.64 4.39
 3 4 -9 61.48 6.55
 -3 4 9 59.58 6.44
 -3 4 9 49.14 6.98
 -3 4 9 53.14 5.83
 -3 4 9 59.02 7.61
 3 4 -9 59.31 7.32
 3 4 -8 37.16 5.01
 3 4 -8 39.71 4.97
 -3 4 8 37.08 5.81
 -3 4 8 45.43 6.37
 -3 4 8 41.48 5.36
 -3 4 8 39.86 4.72
 3 4 -8 39.63 5.89
 3 4 -7 30.77 4.56
 -3 4 7 45.48 5.6
 -3 4 7 34.65 5.27
 -3 4 7 29.44 3.79
 3 4 -7 25.69 3.89
 -3 4 7 33.98 5.18
 3 4 -7 25.37 4.67
 3 4 -6 20.04 1.98
 3 4 -6 26.08 4.2
 -3 4 6 15.42 3.37
 -3 4 6 18.81 3.73
 -3 4 6 16.81 3.53
 3 4 -6 17.84 3.08
 -3 4 6 14.5 2.65
 3 4 -6 21.4 4.11
 3 4 -5 233.95 12.59
 -3 4 5 241.47 12.19
 -3 4 5 260.84 12.85
 -3 4 5 242.2 12.89
 -3 4 5 236.21 6.42
 3 4 -5 261.68 13.56
 3 4 -5 243.63 8.07
 -3 4 5 245.92 9.91
 3 4 -5 244.47 12.38
 3 4 -5 249.4 10.89
 3 4 -4 53.57 5.97
 -3 4 4 63.63 5.7
 -3 4 4 55.19 3.63
 -3 4 4 51.66 5.33
 3 4 -4 52.13 3.83
 -3 4 4 54.6 4.32
 3 4 -4 52.15 5.51
 -3 4 4 47.64 5.7
 3 4 -4 45.65 5.69
 -3 4 4 55.29 3.56
 3 4 -4 54.88 4.83
 3 4 -3 155.69 10.2
 -3 4 3 178.41 9
 -3 4 3 166.97 9.04
 -3 4 3 153.15 10.06
 -3 4 3 156.45 7.17
 3 4 -3 173 10.92
 3 4 -3 162.2 7.54
 3 4 -3 155.14 8.97
 3 4 -3 156.77 8.27
 -3 4 3 149.41 7.06
 -3 4 3 148.14 7.25
 3 4 -2 22.59 3.06
 -3 4 2 25.32 3.1
 -3 4 2 22.77 2.61
 3 4 -2 23.53 4.2
 -3 4 2 22.65 3.99
 -3 4 2 18.21 2.97
 -3 4 2 23.83 3.05
 3 4 -2 16.09 2.84
 -3 4 2 23.38 2.92
 3 4 -2 25.12 3.47
 3 4 -2 26.84 4.34
 3 4 -1 275.43 13.87
 3 4 -1 317.46 14.64
 -3 4 1 283.86 9.91
 -3 4 1 308.51 14.45
 -3 4 1 303.08 12.14
 3 4 -1 300.95 12.26
 -3 4 1 283.44 11.14
 3 4 -1 289.28 12.26
 3 4 -1 319.12 15.05
 -3 4 1 304.31 9.01
 -3 4 0 333.5 9.78
 3 4 0 335.58 15.42
 3 4 0 384.51 16.11
 -3 4 0 344.02 15.44
 -3 4 0 334.47 13.7
 -3 4 0 329.96 12.84
 3 4 0 331.09 15.54
 3 4 0 338.18 14.07
 -3 4 0 322.36 7.94
 3 4 1 409.76 16.74
 3 4 1 393.63 17.03
 -3 4 -1 389.57 16.57
 -3 4 -1 370.56 15.51
 3 4 1 391.48 16.89
 3 4 1 414.64 16.52
 -3 4 -1 370.26 14.59
 3 4 1 362.13 8.07
 3 4 2 449.32 19.12
 3 4 2 481.78 18.47
 3 4 2 441.73 10.31
 3 4 2 468.86 19.16
 -3 4 -2 462.87 18.2
 -3 4 -2 457.75 18.24
 3 4 3 62.72 6.57
 3 4 3 62.4 7.04
 -3 4 -3 55.45 6.16
 -3 4 -3 56.68 6.6
 3 4 3 55.06 6.75
 3 4 3 66.51 6.71
 3 4 4 304.4 14.53
 3 4 4 270.37 15.42
 -3 4 -4 296.77 14.43
 -3 4 -4 285.94 15.71
 3 4 4 291.41 14.58
 3 4 4 283.73 15.73
 3 4 5 7.49 2.76
 -3 4 -5 7.58 2.65
 3 4 5 5.33 2.63
 -3 4 -5 8.49 3.22
 3 4 5 6.65 2.64
 3 4 5 6.18 3.19
 -3 4 -6 153.24 12.41
 3 4 6 116.14 10.8
 3 4 6 123.82 10.99
 -3 4 -6 119.05 9.05
 3 4 6 133.68 10.19
 3 4 7 18.32 4.87
 3 4 7 12.62 4.14
 -3 4 -7 9.52 3.92
 3 4 7 15.92 4.17
 -3 4 -7 10.83 2.77
 3 4 8 18.44 5.03
 -3 4 -8 20.29 5
 3 4 8 19.22 5.24
 -3 4 -9 3.67 2.71
 3 4 9 5.32 3.36
 3 4 9 -0.65 2.35
 3 4 10 2.51 2.29
 -3 5 11 2.63 2.58
 -3 5 11 0.65 2.49
 3 5 -11 -1.32 2.28
 -3 5 10 46.32 7.64
 3 5 -10 51.95 7.76
 -3 5 10 39.75 6.98
 -3 5 9 1.73 2.05
 -3 5 9 -0.9 2.54
 -3 5 9 0.86 1.92
 3 5 -9 5.49 3.24
 -3 5 8 92.12 9.66
 -3 5 8 99.2 9.88
 -3 5 8 95.95 9.23
 3 5 -8 84.07 8.91
 -3 5 7 105.12 9.75
 -3 5 7 111.55 9.74
 -3 5 7 108.62 9.82
 3 5 -7 94.36 8.98
 3 5 -6 25.58 5.04
 3 5 -6 28.1 5.16
 -3 5 6 28.23 5.05
 -3 5 6 30.89 5.18
 -3 5 6 28.1 5.31
 3 5 -6 23.37 3.49
 3 5 -6 26.42 4.7
 3 5 -5 249.92 14.51
 -3 5 5 230.24 13.01
 -3 5 5 252.2 13.73
 -3 5 5 214.2 13.68
 3 5 -5 244.08 14.58
 3 5 -5 228.54 12.98
 3 5 -5 236.28 10.66
 3 5 -4 268.48 15.02
 -3 5 4 268.7 13.23
 -3 5 4 254.8 13.35
 -3 5 4 251.32 14.67
 3 5 -4 254.53 11.05
 3 5 -4 250.64 14.86
 3 5 -4 252.95 13.15
 -3 5 4 238.31 9.38
 3 5 -3 301.43 16.06
 -3 5 3 323.09 13.65
 -3 5 3 298.1 15.91
 3 5 -3 294.99 16.2
 3 5 -3 273.75 11.8
 -3 5 3 280.95 10.37
 -3 5 3 270.51 10.47
 3 5 -3 315.42 14.13
 -3 5 3 304.75 13.95
 3 5 -2 120.6 9.97
 -3 5 2 117.08 7.47
 -3 5 2 134.39 10.56
 3 5 -2 111.15 9.8
 -3 5 2 106.56 6.95
 -3 5 2 109.98 6.44
 3 5 -2 112.94 7.56
 3 5 -2 118.07 8.15
 -3 5 2 117.27 8.11
 3 5 -1 230.13 13.77
 -3 5 1 219.43 9.68
 3 5 -1 220.98 13.82
 -3 5 1 235.9 13.96
 -3 5 1 194.22 9.34
 -3 5 1 217.45 10.88
 3 5 0 25.66 4.8
 -3 5 0 29.13 5.08
 3 5 0 28.31 5.16
 -3 5 0 24.87 3.06
 -3 5 0 25.91 4.07
 3 5 0 25.15 4.77
 -3 5 0 21.34 3.4
 3 5 1 162.49 11.59
 3 5 1 156.43 11.48
 -3 5 -1 150.78 11.23
 3 5 1 172.99 12.13
 -3 5 -1 147.4 10.04
 3 5 2 20.5 4.3
 -3 5 -2 22.15 4.35
 -3 5 -2 23.6 4.7
 3 5 2 20.77 4.54
 3 5 2 24.25 4.74
 3 5 3 81.47 8.75
 3 5 3 88.98 9.2
 -3 5 -3 76.17 8.04
 3 5 3 69.78 7.83
 -3 5 -3 77.53 8.16
 3 5 3 79.17 8.21
 -3 5 -4 20.16 4.57
 -3 5 -4 25.06 5.22
 3 5 4 30.01 5.7
 3 5 4 29.31 5.63
 3 5 5 9.16 3.51
 -3 5 -5 13.87 4.01
 3 5 5 9.69 3.86
 -3 5 -5 4.61 2.55
 3 5 6 45.96 7.4
 3 5 6 35.02 6.61
 -3 5 -6 31.68 5.26
 -3 5 -6 38.54 6.79
 3 5 7 86.35 10.16
 3 5 7 73.93 9.59
 -3 5 -7 67.39 9.01
 3 5 8 4.05 3.2
 -3 5 -8 6.32 3.5
 3 5 8 6.19 3.94
 -3 6 10 1.62 3.16
 -3 6 10 12.99 4.43
 -3 6 9 13.59 4.54
 3 6 -9 14.07 4.65
 -3 6 9 9.57 3.78
 -3 6 8 20.72 5.18
 -3 6 8 13.07 4.43
 -3 6 8 7.84 3.4
 3 6 -8 14.43 4.22
 3 6 -7 -2.25 2.45
 -3 6 7 1.69 1.9
 -3 6 7 1.07 2.82
 -3 6 7 -4.1 2.77
 3 6 -6 24.04 5.24
 -3 6 6 26.22 5.1
 -3 6 6 19.82 4.36
 -3 6 6 23.38 4.98
 3 6 -6 20.8 4.65
 -3 6 5 19.88 4.27
 -3 6 5 19.13 4.68
 3 6 -5 18.95 4.67
 3 6 -5 11.05 3.39
 -3 6 5 20.25 4.18
 3 6 -4 35.03 6.03
 -3 6 4 36.76 5.27
 -3 6 4 41.92 5.87
 -3 6 4 43.33 6.87
 3 6 -4 46.41 5.95
 -3 6 3 83.31 7.48
 -3 6 3 92.25 9.84
 3 6 -3 97 8.27
 3 6 -3 80.99 9.28
 -3 6 3 98.84 8.55
 -3 6 2 27.28 5.51
 3 6 -2 34.32 6.19
 -3 6 2 34.83 4.56
 3 6 -2 35.51 4.92
 3 6 -1 41.82 6.69
 -3 6 1 36.55 6.31
 3 6 -1 28.91 5.84
 -3 6 1 41.56 4.99
 3 6 0 77.27 8.8
 3 6 0 83.24 9.38
 -3 6 0 63.41 8.15
 -3 6 0 63.85 6.56
 3 6 0 76.2 8.92
 3 6 1 45.1 6.97
 3 6 1 43.73 6.92
 -3 6 -1 48.11 7.18
 -3 6 -1 48.36 6.12
 -3 6 -2 102.38 9.27
 -3 6 -2 124.9 11.34
 3 6 2 122.79 11.36
 3 6 2 102.09 10.48
 3 6 3 28.71 5.84
 -3 6 -3 43.63 6.87
 -3 6 -3 36.07 5.9
 3 6 3 43.03 7.03
 -3 6 -4 54.11 7.68
 3 6 4 49.47 7.73
 -3 6 -4 36.6 6.33
 3 6 4 53.15 7.98
 3 6 5 -5.51 3.69
 -3 6 -5 5.41 3.02
 -3 6 -5 -2.88 3.08
 3 6 5 -2.18 2.69
 3 6 6 42.08 7.69
 -3 6 -6 43.77 7.45
 3 6 6 51.68 8.46
 -3 6 -6 39.2 6.64
 -3 6 -7 3.92 2.87
 -3 7 8 21.08 5.48
 -3 7 8 18.85 5.28
 -3 7 8 12.31 4.54
 -3 7 7 23.44 5.36
 -3 7 7 14.38 4.95
 -3 7 7 18.07 5.01
 3 7 -7 23.49 5.28
 3 7 -6 33.06 6.84
 3 7 -6 27.85 5.85
 -3 7 6 36.58 6.05
 -3 7 6 46.94 7.34
 -3 7 6 30.87 6.43
 -3 7 5 95.13 10.02
 -3 7 5 109.23 10.19
 3 7 -5 90.51 9.36
 -3 7 5 92.92 11.07
 3 7 -5 92.18 11.11
 -3 7 4 65.42 8.01
 3 7 -4 77.24 10.02
 -3 7 4 67.51 9.34
 3 7 -4 56.03 7.19
 3 7 -3 67.57 7.48
 3 7 -3 80.82 10.04
 -3 7 3 74.04 9.69
 3 7 -2 28.58 6.44
 -3 7 2 33.86 6.76
 -3 7 1 -0.73 2.68
 3 7 -1 -0.96 2.6
 -3 7 0 3.02 2.74
 3 7 0 1.15 2.19
 3 7 1 14.73 4.72
 -3 7 -1 23.36 4.57
 3 7 1 12.89 4.64
 -3 7 -1 22.38 6.07
 -3 7 -2 0.96 2.49
 3 7 2 2.89 2.58
 -3 7 -2 6.77 3.05
 3 7 2 6.95 3.56
 3 7 3 26.04 5.94
 -3 7 -3 16.12 5.01
 3 7 3 26.63 6.24
 -3 7 -3 8.2 3.2
 -3 7 -4 -3.91 2.91
 -3 7 -4 -3.13 2.55
 3 7 4 -0.59 2.58
 -3 7 -5 -0.76 2.1
 -3 7 -5 -0.07 2.3
 -3 7 -6 4.21 3.16
 3 8 -5 10.37 3.32
 -4 -8 5 -4.93 3.25
 -4 -8 0 17.45 4.89
 -4 -8 -1 0.55 2.49
 -4 -7 7 0.63 2.45
 4 -7 -6 23.28 6.22
 -4 -7 6 11.14 4.27
 4 -7 -5 33.12 7.03
 -4 -7 5 42.17 7.33
 4 -7 -4 39.79 7.91
 -4 -7 4 30.09 6.14
 4 -7 -3 74.31 10.41
 -4 -7 3 71.3 8.4
 -4 -7 3 69.91 8.64
 -4 -7 2 47.42 6.85
 4 -7 -2 61.46 9.35
 -4 -7 2 57.16 7.44
 4 -7 -1 25.04 6.42
 -4 -7 1 33.62 5.99
 4 -7 0 17.43 5.48
 -4 -7 0 19.26 4.82
 4 -7 1 12.75 4.95
 4 -7 1 5.11 2.77
 -4 -7 -1 9 3.12
 4 -7 2 4.1 3.13
 -4 -7 -2 11.33 3.89
 4 -7 3 10.4 4.5
 4 -7 3 11.7 3.74
 -4 -7 -3 7.77 3.79
 4 -7 4 0.75 2.8
 -4 -7 -5 -2.74 2.56
 4 -6 -10 12.63 4.81
 4 -6 -10 12.05 4.03
 -4 -6 9 33.79 7.59
 4 -6 -9 32.44 6.09
 -4 -6 8 25.85 6.32
 4 -6 -8 26.44 5.16
 4 -6 -8 23.75 6.08
 -4 -6 7 21.04 5.59
 4 -6 -7 32.53 5.42
 4 -6 -7 24.04 5.85
 -4 -6 6 3.49 2.88
 4 -6 -6 4.78 2.9
 4 -6 -5 2.97 2.51
 -4 -6 5 1.09 2.85
 -4 -6 4 26.96 4.54
 -4 -6 4 21.22 4.74
 -4 -6 3 10.25 3.15
 -4 -6 3 5.46 2.87
 4 -6 -2 105 7.71
 -4 -6 2 94.7 8.78
 -4 -6 2 93.36 8.52
 4 -6 -2 96.1 10.6
 -4 -6 2 82.02 7.45
 4 -6 -1 35.79 6.82
 -4 -6 1 28.57 4.8
 -4 -6 1 23.02 4.27
 4 -6 -1 32.37 4.6
 -4 -6 1 37.37 5.26
 -4 -6 1 40.22 5.79
 4 -6 0 28.03 6.01
 -4 -6 0 26.58 4.85
 4 -6 0 31.22 4.97
 -4 -6 0 34.67 5.28
 -4 -6 0 33.66 4.82
 -4 -6 0 38.3 5.8
 4 -6 1 33.59 6.46
 -4 -6 -1 30.77 5.36
 -4 -6 -1 30.16 5.39
 4 -6 1 30.55 5.38
 -4 -6 -1 32.78 5.62
 4 -6 2 123.25 10.87
 -4 -6 -2 147.69 11.7
 -4 -6 -2 141.94 11.43
 4 -6 2 122.49 12.27
 4 -6 3 33.23 6.23
 4 -6 3 46.66 8.09
 -4 -6 -3 41.71 6.65
 4 -6 4 89.93 10.71
 4 -6 4 93.34 10.39
 -4 -6 -4 95.43 10.31
 4 -6 5 16.14 5.12
 -4 -6 -5 17.39 4.93
 4 -6 5 23.33 5.59
 4 -6 6 13.79 4.75
 -4 -6 -6 8.83 3.74
 4 -6 6 5.6 3.74
 -4 -5 12 1.65 2.24
 4 -5 -12 -3.79 3.14
 -4 -5 11 3.58 2.46
 -4 -5 11 -2.49 3.46
 4 -5 -11 1.21 2.44
 4 -5 -11 2.92 2.59
 -4 -5 10 13.59 3.72
 -4 -5 10 18.22 5.58
 4 -5 -10 19.41 4.93
 4 -5 -10 14.64 4.74
 -4 -5 9 3.37 2.05
 -4 -5 9 1.8 2.94
 4 -5 -9 7.72 3.32
 4 -5 -9 10.85 4.1
 4 -5 -8 83.39 8.6
 -4 -5 8 83.06 7.97
 4 -5 -8 68.46 8.65
 -4 -5 8 71.34 9.25
 -4 -5 7 9.15 2.67
 -4 -5 7 8.44 3.8
 4 -5 -7 7.09 3.02
 4 -5 -7 7.52 3.4
 -4 -5 7 9.22 2.69
 -4 -5 6 115.94 8.28
 4 -5 -6 98.3 8.37
 -4 -5 6 125.91 11.03
 4 -5 -6 110.59 10.42
 -4 -5 6 104.83 7.6
 -4 -5 6 115.98 8.18
 4 -5 -5 129 11.11
 -4 -5 5 144.31 8.99
 4 -5 -5 115.18 8.45
 -4 -5 5 123.83 7.99
 -4 -5 5 127.72 10.69
 -4 -5 5 123.98 8.36
 -4 -5 4 176.79 8.79
 4 -5 -4 151.51 8.5
 -4 -5 4 178.24 12.14
 4 -5 -4 171.64 12.72
 -4 -5 4 146 9.36
 -4 -5 4 168.33 9.97
 -4 -5 3 327.51 11.3
 -4 -5 3 319.41 15.93
 4 -5 -3 340.4 11.64
 -4 -5 3 352.6 14.81
 4 -5 -3 348.24 18.29
 -4 -5 3 348.36 15
 -4 -5 2 81.71 7.18
 4 -5 -2 82.88 6.44
 -4 -5 2 79.02 7.01
 -4 -5 2 82.57 7.61
 4 -5 -2 71.12 8.36
 -4 -5 1 242.07 13.05
 4 -5 -1 251.28 12.25
 -4 -5 1 264.48 13.34
 -4 -5 1 234.95 12.39
 4 -5 -1 245.49 15.58
 -4 -5 1 246.6 12.95
 4 -5 0 42.1 6.62
 -4 -5 0 40.87 5.41
 -4 -5 0 31.66 4.91
 4 -5 0 41.82 5.27
 4 -5 1 84.64 7.92
 4 -5 1 77.05 8.81
 -4 -5 -1 79.75 8.06
 -4 -5 -1 82.63 7.99
 -4 -5 -2 10.39 3.35
 4 -5 2 8.03 3.46
 4 -5 2 13.24 3.56
 -4 -5 -3 57.64 7.64
 4 -5 3 65.03 7.78
 4 -5 3 65.87 8.43
 4 -5 4 -0.04 2.65
 -4 -5 -4 5.58 2.8
 4 -5 4 -0.03 1.66
 4 -5 5 2.09 2.46
 4 -5 5 4.24 3.01
 -4 -5 -5 4.26 2.77
 -4 -5 -6 1.19 2.15
 4 -5 6 5.97 3.45
 4 -5 6 -0.69 2.36
 4 -5 7 22.81 5.5
 -4 -5 -7 22.63 5.89
 4 -5 7 23.68 6.09
 4 -5 8 -0.88 2.09
 -4 -4 12 -2.77 2.77
 4 -4 -12 -2.06 2.4
 -4 -4 12 -1.65 3.28
 -4 -4 11 48.64 7.38
 4 -4 -11 55.76 8.08
 -4 -4 11 46.9 8.32
 -4 -4 10 2.63 2.79
 4 -4 -10 3.97 2.94
 -4 -4 10 6.11 3.48
 -4 -4 9 292.38 15.83
 4 -4 -9 282.04 16.39
 4 -4 -9 273.46 16.1
 -4 -4 9 316.23 18.85
 -4 -4 9 288.16 14.55
 4 -4 -8 26.55 4.85
 -4 -4 8 25.91 5.48
 4 -4 -8 28.05 5.28
 -4 -4 8 31.98 5.02
 -4 -4 8 26.3 4.24
 4 -4 -7 68.37 7.22
 -4 -4 7 59.1 6.23
 4 -4 -7 77.63 7.99
 -4 -4 7 67.59 7.94
 -4 -4 7 60.05 4.72
 -4 -4 7 57.03 5.94
 4 -4 -6 74.95 6.98
 -4 -4 6 81.38 6.76
 -4 -4 6 76.84 6.55
 4 -4 -6 89.8 8.3
 -4 -4 6 71.55 7.79
 -4 -4 6 78.95 5.51
 -4 -4 5 64.5 5.67
 4 -4 -5 68 6.22
 -4 -4 5 66.83 7.12
 4 -4 -5 67.4 7.22
 -4 -4 5 63.7 5.07
 -4 -4 5 75.42 6.37
 4 -4 -4 71.09 5.68
 -4 -4 4 76.48 5.7
 -4 -4 4 73.75 7.17
 -4 -4 4 65.73 5.18
 4 -4 -4 75.72 7.48
 -4 -4 4 71.53 6.18
 4 -4 -3 62.46 7.09
 4 -4 -3 55.17 4.51
 4 -4 -3 53.77 4.44
 -4 -4 3 58.02 4.57
 -4 -4 3 65.41 5.19
 -4 -4 3 56.39 5.62
 4 -4 -2 303.39 9.92
 -4 -4 2 289.89 10.14
 4 -4 -2 274.42 11.43
 -4 -4 2 319.51 12.57
 4 -4 -2 292.36 15.14
 4 -4 -2 293.59 9.8
 -4 -4 2 318.64 13.71
 -4 -4 1 331.83 10.22
 4 -4 -1 325.28 8.97
 4 -4 -1 339.25 13.56
 4 -4 -1 344.68 16.81
 -4 -4 1 335.79 14.58
 4 -4 0 52.11 3.49
 -4 -4 0 45.23 3.41
 4 -4 0 49.94 5.39
 4 -4 0 55.18 6.97
 -4 -4 0 45.96 5.55
 4 -4 1 298.33 8.43
 4 -4 1 284.77 15.82
 -4 -4 -1 301.27 9.9
 4 -4 1 324.73 14.86
 -4 -4 -1 323.24 15.75
 4 -4 2 457.88 19.09
 4 -4 2 481.84 20.96
 -4 -4 -2 454.16 19.76
 4 -4 3 68.38 5.02
 4 -4 3 74.52 7.85
 4 -4 3 75.54 8.37
 -4 -4 -3 70.96 8.13
 4 -4 4 344.45 18
 4 -4 4 388.88 19.14
 -4 -4 -4 363.08 18.84
 4 -4 5 55.51 7.33
 -4 -4 -5 53.54 7.67
 4 -4 5 50.5 7.33
 4 -4 6 6.39 3.37
 -4 -4 -6 -1.15 3.07
 4 -4 6 -0.18 2.07
 4 -4 7 26.62 5.73
 -4 -4 -7 16.38 5.07
 4 -4 7 27.82 6.09
 4 -4 8 15.73 4.69
 -4 -4 -8 11.1 4.49
 4 -4 8 18.25 5.19
 4 -4 9 9.66 4.39
 -4 -3 13 8.69 4.09
 4 -3 -13 5.26 3.52
 4 -3 -12 8.46 3.84
 -4 -3 12 15.13 4.97
 4 -3 -11 3.49 2.6
 -4 -3 11 9.44 4.23
 4 -3 -10 10.26 3.88
 -4 -3 10 15.71 4.62
 4 -3 -9 84.98 8.65
 -4 -3 9 105.69 10.11
 -4 -3 9 82.52 7.71
 -4 -3 9 85.35 8.31
 4 -3 -8 269.29 14.65
 -4 -3 8 254.01 13.62
 -4 -3 8 303.27 16.29
 -4 -3 8 266.37 13.28
 -4 -3 7 40.99 5.01
 -4 -3 7 44.51 5.35
 -4 -3 7 47.65 6.23
 4 -3 -7 41.04 5.43
 4 -3 -7 38.67 5.47
 -4 -3 7 44.16 3.36
 4 -3 -6 1161.98 30.87
 4 -3 -6 1173.58 31.04
 -4 -3 6 1185.21 32.85
 -4 -3 6 1193.27 23.28
 -4 -3 6 1198.53 30.04
 -4 -3 6 1234.43 30.33
 -4 -3 5 28.06 3.94
 -4 -3 5 27.92 3.75
 -4 -3 5 23.5 2.41
 -4 -3 5 23.81 4.25
 4 -3 -5 24.73 3.83
 4 -3 -5 20.59 3.85
 -4 -3 4 778.47 20.69
 4 -3 -4 777.94 21.21
 4 -3 -4 767.06 23.29
 -4 -3 4 785.03 17.61
 -4 -3 4 765 22.05
 -4 -3 3 440.73 13.78
 4 -3 -3 456.97 14.12
 -4 -3 3 431.29 12.27
 4 -3 -3 420.81 16.37
 4 -3 -3 421.17 13.66
 -4 -3 3 421.57 15.54
 -4 -3 2 72.75 4.85
 4 -3 -2 70.93 6.52
 4 -3 -2 70.16 4.74
 4 -3 -2 81.66 5.03
 -4 -3 2 73.79 6.17
 4 -3 -1 957.85 24.01
 4 -3 -1 926.2 19.97
 -4 -3 1 959.65 21.31
 4 -3 -1 929.15 26.89
 -4 -3 1 957.26 25.71
 4 -3 -1 941.83 20.23
 4 -3 0 59.57 3.63
 4 -3 0 53.41 5.09
 4 -3 0 55.66 6.12
 -4 -3 0 52.45 4.03
 -4 -3 0 51.28 5.39
 -4 -3 -1 165.29 7.66
 4 -3 1 157.66 9.46
 4 -3 1 180.03 11.01
 -4 -3 -2 95.97 6.22
 -4 -3 -2 108.95 8.82
 4 -3 2 103.14 8.11
 4 -3 2 100.89 8.43
 4 -3 3 67.52 2.74
 4 -3 3 70.67 5.49
 4 -3 3 75.63 7.39
 -4 -3 -3 77.95 7.78
 4 -3 3 89.32 8.06
 -4 -3 -4 19.65 4.43
 4 -3 4 26.94 4.89
 4 -3 4 12.47 2.47
 4 -3 4 29.02 4.94
 4 -3 5 102.59 7.16
 4 -3 5 98.65 9.24
 4 -3 5 117.2 10.04
 -4 -3 -5 108.86 10.07
 4 -3 6 31.12 5.62
 -4 -3 -6 28.7 5.84
 4 -3 6 31.94 4.18
 4 -3 6 38.05 6.1
 -4 -3 -7 34.36 6.42
 4 -3 7 35.84 6.23
 4 -3 7 25.78 5.69
 -4 -3 -8 34.65 6.59
 4 -3 8 35.01 6.33
 4 -3 8 36.29 6.93
 4 -3 9 11.7 4.08
 -4 -3 -9 11.72 4.8
 4 -3 9 12.84 4.59
 -4 -2 14 8.5 4.27
 -4 -2 13 -0.8 2.7
 4 -2 -13 4.32 2.67
 -4 -2 12 51.15 7.82
 4 -2 -12 33.09 6.61
 -4 -2 11 46.01 7.01
 4 -2 -11 40.14 6.73
 4 -2 -10 9.14 3.41
 -4 -2 10 7.65 3.17
 4 -2 -9 199.22 12.82
 -4 -2 9 179.33 11.93
 -4 -2 9 194.66 12.79
 -4 -2 9 188.93 11.69
 4 -2 -8 220.19 12.76
 4 -2 -8 197 7.96
 -4 -2 8 208.91 12.67
 -4 -2 8 212.73 11.75
 -4 -2 8 211.74 12.14
 4 -2 -7 283.94 13.81
 -4 -2 7 278.08 7.5
 -4 -2 7 270.22 13.07
 -4 -2 7 294.78 14.28
 -4 -2 7 294.7 13.46
 -4 -2 6 725.14 21.3
 4 -2 -6 690.82 21.89
 -4 -2 6 702.1 15.32
 4 -2 -6 715.03 20.25
 -4 -2 6 710.79 21.27
 4 -2 -5 96.2 6.97
 -4 -2 5 88.3 6.43
 -4 -2 5 83.16 4.53
 4 -2 -5 84.81 6.14
 -4 -2 5 92.41 6.67
 -4 -2 5 81.21 2.6
 -4 -2 4 1569.81 32.97
 4 -2 -4 1520.5 33.25
 -4 -2 4 1554.35 29.79
 4 -2 -4 1585.12 33.15
 -4 -2 4 1512.51 24.92
 -4 -2 4 1564.04 34.26
 -4 -2 3 118.15 6.59
 4 -2 -3 109.04 6.44
 -4 -2 3 117.5 4.3
 4 -2 -3 104.66 6.72
 4 -2 -3 114.14 6.63
 -4 -2 3 107.43 7.15
 4 -2 -2 290.65 10.42
 -4 -2 2 299.29 10.6
 4 -2 -2 291.44 11.9
 4 -2 -2 303.57 10.63
 -4 -2 2 299.05 12.2
 -4 -2 1 1630.83 32.11
 4 -2 -1 1618.96 35.42
 4 -2 -1 1653.92 31.54
 -4 -2 1 1607.24 35.38
 4 -2 -1 1599.93 31.34
 4 -2 0 137.64 6.39
 -4 -2 0 137.09 6.91
 4 -2 0 139.74 7.79
 4 -2 0 138.26 8.37
 -4 -2 0 134.85 8.36
 4 -2 1 470.88 13.72
 -4 -2 -1 504.59 15.15
 4 -2 1 501.9 16.71
 4 -2 1 509.94 17.51
 4 -2 2 96.56 7.27
 4 -2 2 85.2 6.94
 -4 -2 -3 7.55 2.87
 4 -2 3 9.39 0.94
 4 -2 3 8.26 2.71
 4 -2 3 10.02 1.11
 4 -2 3 8.08 2.3
 4 -2 3 10.19 2.71
 -4 -2 -3 9.91 2.77
 4 -2 4 587.06 13.12
 4 -2 4 588.2 13.74
 4 -2 4 593.59 19.14
 4 -2 4 645.23 22.22
 -4 -2 -4 631.64 23.37
 4 -2 4 629.74 21.86
 4 -2 5 289.17 9.51
 4 -2 5 308.31 10.22
 4 -2 5 301.84 13.56
 4 -2 5 303.96 15.64
 -4 -2 -5 308.28 16.38
 4 -2 5 305.85 15.37
 4 -2 6 157.4 7.62
 4 -2 6 178.16 8.45
 4 -2 6 177.15 10.69
 -4 -2 -6 173 10.14
 4 -2 6 178.57 12.43
 4 -2 6 190.19 12.58
 -4 -2 -6 190.12 13.5
 -4 -2 -7 125.15 8.92
 4 -2 7 146.33 11.84
 4 -2 7 140.94 11.35
 -4 -2 -7 129.45 11.55
 -4 -2 -8 -1.5 2.89
 -4 -2 -8 0.47 1.51
 4 -2 8 0.09 2.35
 -4 -2 -9 -2.8 2.89
 4 -2 9 -1.46 1.8
 4 -2 9 2.44 2.49
 -4 -2 -10 10.15 4.57
 4 -2 10 4.95 3.19
 -4 -1 14 0.95 3.03
 -4 -1 14 -0.88 2.88
 4 -1 -14 0.05 2.18
 -4 -1 13 6.37 3.44
 -4 -1 13 6.57 3.04
 4 -1 -13 14.17 4.43
 -4 -1 12 1.72 2.58
 -4 -1 12 -0.04 2.68
 4 -1 -12 1.11 2.94
 -4 -1 11 26 5.38
 -4 -1 11 29.56 5.37
 4 -1 -11 25.24 5.3
 -4 -1 10 12.07 3.69
 -4 -1 10 16.73 3.88
 4 -1 -10 14.98 3.83
 -4 -1 9 6.32 2.61
 -4 -1 9 1.69 1.96
 4 -1 -9 -0.85 2.21
 -4 -1 9 5.26 2.38
 4 -1 -8 68.95 6.97
 -4 -1 8 81.97 7.26
 4 -1 -8 77.1 3.25
 -4 -1 8 73.18 6.92
 -4 -1 8 75.71 7.01
 -4 -1 7 128.96 8.57
 4 -1 -7 102.16 7.86
 -4 -1 7 119.15 8.22
 -4 -1 7 116.85 8.26
 4 -1 -6 1573.28 36.47
 -4 -1 6 1568.86 35.52
 -4 -1 6 1625.53 36.16
 -4 -1 5 435.04 14.89
 4 -1 -5 445.12 15.63
 4 -1 -5 390.09 12.04
 -4 -1 5 432.58 15.02
 -4 -1 4 313.32 11.85
 4 -1 -4 303.81 12.04
 4 -1 -4 322.32 10.25
 -4 -1 4 340.89 12.78
 4 -1 -3 647.74 17.9
 -4 -1 3 635.81 17.42
 4 -1 -3 620.69 15.76
 -4 -1 3 639.17 18.45
 4 -1 -2 654.07 17.21
 -4 -1 2 600.46 16.58
 4 -1 -2 588.94 15.85
 -4 -1 2 633.37 12.85
 -4 -1 2 641.24 18.23
 4 -1 -2 636.04 17.02
 -4 -1 1 2780.67 49.51
 4 -1 -1 2738.73 49.19
 4 -1 -1 2759.85 49.29
 -4 -1 1 2768.83 46.27
 -4 -1 1 2843.96 51.94
 4 -1 -1 2752.63 49.18
 -4 -1 0 481.76 14.23
 -4 -1 0 487.21 14.83
 4 -1 0 497.88 14.36
 4 -1 0 511.77 14.99
 -4 -1 0 501.64 13.68
 -4 -1 0 486.55 16.15
 -4 -1 -1 1490.03 31.18
 -4 -1 -1 1536.62 32.82
 4 -1 1 1515.85 31.85
 4 -1 1 1552.44 33.22
 4 -1 1 1564.03 32.83
 4 -1 2 64.79 3.55
 4 -1 2 66.18 3.07
 -4 -1 -2 72.01 5.79
 4 -1 2 69.76 5.69
 4 -1 2 62.65 5.48
 4 -1 2 76.7 6.03
 4 -1 3 110.36 5.23
 4 -1 3 109.12 4.84
 4 -1 3 100.05 7.3
 4 -1 3 108.14 7.69
 -4 -1 -3 102.47 7.55
 -4 -1 -3 104.31 8.18
 4 -1 3 102.96 7.5
 4 -1 4 208.31 8.36
 4 -1 4 209.97 8.1
 4 -1 4 230.6 11.79
 -4 -1 -4 234.23 12.37
 4 -1 4 204.29 11.31
 -4 -1 -4 203.46 12.08
 4 -1 4 230.8 11.87
 4 -1 5 118.15 6.71
 4 -1 5 122.05 6.7
 4 -1 5 104.56 8.29
 4 -1 5 115.49 8.98
 -4 -1 -5 124.43 10.01
 4 -1 5 118.26 9.09
 4 -1 6 358.02 13.5
 4 -1 6 374.15 13.66
 4 -1 6 363.67 16.79
 -4 -1 -6 368.31 15.92
 4 -1 6 397.02 17.66
 -4 -1 -6 370.24 18.12
 4 -1 7 30.1 4.13
 4 -1 7 31.48 4.22
 -4 -1 -7 31.56 4.8
 -4 -1 -7 35.96 6.01
 4 -1 7 33.42 4.74
 4 -1 7 37.1 5.63
 4 -1 8 23.33 3.96
 4 -1 8 22.16 3.82
 -4 -1 -8 20.49 4.95
 -4 -1 -8 19.41 4.07
 4 -1 8 31.93 4.71
 4 -1 8 26.61 5.12
 -4 -1 -9 8.97 3.13
 4 -1 9 7.72 2.75
 4 -1 9 1.84 2.78
 -4 -1 -10 16.79 4.98
 4 -1 10 16.14 4.31
 -4 -1 -11 1.96 3
 4 -1 11 8.27 3.29
 -4 0 14 5.83 3.28
 4 0 -14 -3.86 3.54
 -4 0 13 9.54 4.06
 4 0 -13 2.96 2.15
 -4 0 13 5.42 2.89
 4 0 -13 7.01 3.64
 4 0 -12 86.42 7.7
 4 0 -12 100.84 10.24
 -4 0 12 93.17 8.95
 -4 0 12 108.71 10.59
 -4 0 11 41.75 6.36
 4 0 -11 39.25 4.95
 -4 0 11 42.14 5.73
 4 0 -11 39.29 6.18
 -4 0 10 46.73 6.23
 4 0 -10 41.05 3.67
 -4 0 10 41.21 5.35
 4 0 -10 34 5.47
 4 0 -10 53.48 5.49
 4 0 -9 167.48 11.31
 -4 0 9 190.4 11.78
 4 0 -9 175.52 7.86
 -4 0 9 167.58 10.13
 4 0 -9 166.78 9.35
 -4 0 8 179.66 10.74
 4 0 -8 184.45 11.04
 4 0 -8 180.47 9.2
 -4 0 8 183.25 9.92
 -4 0 8 164.27 10.49
 4 0 -8 169.83 7.75
 4 0 -8 146.18 7.11
 -4 0 7 6.16 2.31
 4 0 -7 10.46 2.25
 4 0 -7 10.79 2.04
 4 0 -7 8.82 2.73
 -4 0 7 10.34 2.59
 -4 0 6 450 15.87
 4 0 -6 447.46 16.53
 4 0 -6 448.16 8.77
 -4 0 6 463.61 16.28
 -4 0 5 566.93 17.14
 4 0 -5 551.37 17.77
 4 0 -5 522.28 11.39
 -4 0 5 509.77 16.68
 -4 0 4 484.86 15.23
 4 0 -4 474.42 15.67
 4 0 -4 482.05 10.25
 -4 0 4 480.11 15.27
 4 0 -3 64.47 5.11
 -4 0 3 57.93 4.66
 -4 0 3 64.56 3.09
 4 0 -3 65.11 3.03
 -4 0 3 65.33 5.04
 -4 0 2 226.32 9.39
 -4 0 2 233.83 7.36
 4 0 -2 228.83 6.96
 4 0 -2 239.39 9.83
 -4 0 2 223.33 9.55
 4 0 -2 229.92 9.59
 -4 0 1 5093.61 80.43
 -4 0 1 5156.93 83.03
 -4 0 1 5119.59 83.18
 4 0 -1 4892.6 82.67
 -4 0 1 4821.86 79.49
 4 0 -1 5058.2 78.8
 -4 0 1 4958.04 82.98
 4 0 -1 5018.35 82.85
 4 0 0 4.51 1.34
 -4 0 0 3.81 1.62
 -4 0 0 2.07 0.96
 -4 0 0 3.96 1.01
 4 0 0 2.61 1.5
 -4 0 0 5.56 1.92
 -4 0 0 2.92 1.01
 4 0 1 5989.47 93.49
 -4 0 -1 5720.12 93.23
 -4 0 -1 5970.2 91.68
 4 0 1 5733.67 97.41
 -4 0 -1 6117.84 98.47
 4 0 1 5940.15 95.5
 -4 0 -2 90.83 5.34
 4 0 2 87.77 5.28
 -4 0 -2 96.17 5.05
 4 0 2 100.2 5.17
 -4 0 -2 96.47 7.06
 4 0 2 81.04 6.31
 4 0 2 93.72 7.07
 4 0 2 97.38 6.43
 4 0 3 2.87 1.24
 -4 0 -3 3.62 2.06
 -4 0 -3 3.55 1.27
 4 0 3 3.62 2
 4 0 3 5.46 1.78
 -4 0 -3 2.58 1.94
 4 0 3 3.29 1.45
 4 0 4 66.55 5.3
 4 0 4 74.71 5.33
 4 0 4 70.76 6.75
 -4 0 -4 59.26 6.45
 4 0 4 73.61 5.91
 4 0 4 68.93 6.03
 -4 0 -4 59.71 6.16
 4 0 4 74.43 4.85
 4 0 5 173.74 9.31
 4 0 5 160.5 8.62
 -4 0 -5 165.72 10.45
 4 0 5 159.77 10.78
 4 0 5 160.35 9.22
 4 0 5 157.12 9.71
 4 0 5 162.16 7.41
 -4 0 -5 158.38 10.55
 4 0 6 142.42 8.98
 4 0 6 120.77 8.12
 -4 0 -6 136.76 9.85
 4 0 6 127.22 10.17
 4 0 6 142.28 9.7
 4 0 6 133.05 8.73
 4 0 6 139 6.72
 -4 0 -6 127.57 10.03
 -4 0 -7 70.76 7.53
 4 0 7 75.25 7.06
 4 0 7 68.4 6.56
 4 0 7 75.4 6.85
 4 0 7 90.96 8.03
 -4 0 -7 81.02 8.43
 4 0 8 3.01 1.95
 4 0 8 1.5 1.97
 -4 0 -8 3.3 2.94
 4 0 8 -0.6 1.53
 4 0 8 -0.29 1.68
 -4 0 -8 -4.5 2.57
 4 0 9 -0.62 1.71
 4 0 9 0.98 2.18
 -4 0 -9 1.26 1.87
 -4 0 -9 0.12 2.15
 4 0 9 1.79 1.8
 4 0 9 3.09 2.37
 4 0 10 17.14 4.16
 -4 0 -10 6.41 3.71
 -4 0 -10 10.27 3.71
 4 0 10 12.95 3.49
 4 0 10 14.77 4.14
 -4 0 -11 5.32 3.55
 -4 0 -11 -1.31 2.26
 4 0 11 0.89 2.23
 4 1 -15 1.28 3.03
 -4 1 14 -0.27 2.71
 -4 1 14 2.73 3.07
 4 1 -14 3.69 2.19
 4 1 -14 -2.2 2.96
 -4 1 13 6.87 3.53
 4 1 -13 10.36 3.28
 4 1 -13 15.24 4.28
 -4 1 12 -1.14 2.4
 4 1 -12 1.83 1.95
 4 1 -12 -0.41 2.95
 -4 1 11 20.25 4.73
 4 1 -11 26.17 4.46
 -4 1 11 23.74 4.13
 4 1 -11 15.51 4.4
 -4 1 10 24.35 4.65
 -4 1 10 16.35 2.4
 4 1 -10 11.84 2.36
 4 1 -10 15.25 3.42
 -4 1 10 15.76 3.34
 4 1 -10 15.36 3.87
 4 1 -9 0.09 0.94
 -4 1 9 4.36 2.28
 4 1 -9 4.62 2
 -4 1 9 5.44 1.91
 4 1 -9 2.74 2.02
 -4 1 8 77.43 6.97
 4 1 -8 79.34 7.42
 4 1 -8 70.56 6.15
 4 1 -8 72.62 5.32
 -4 1 8 78.88 5.86
 4 1 -8 77.06 4.44
 -4 1 7 111.01 7.91
 4 1 -7 116.06 7.53
 4 1 -7 102.09 7.98
 4 1 -7 104.56 6.45
 4 1 -7 111.74 4.53
 -4 1 7 129.25 8.71
 4 1 -6 1618.6 33.07
 -4 1 6 1601.71 34.2
 4 1 -6 1619.95 35.35
 4 1 -6 1628.72 31.74
 -4 1 6 1678.84 34.81
 -4 1 5 416.24 14.66
 -4 1 5 414.5 12.43
 4 1 -5 436.12 10.02
 4 1 -5 422.87 15.57
 4 1 -5 446.76 13.99
 -4 1 5 428.12 14.77
 -4 1 4 324.83 12.29
 4 1 -4 347.8 13.3
 4 1 -4 347.26 9.42
 4 1 -4 358.58 12.18
 -4 1 4 363.58 12.63
 -4 1 3 644.99 17.8
 4 1 -3 669.35 18.9
 4 1 -3 650.13 15.09
 -4 1 3 669.31 15.9
 4 1 -3 625.89 17.3
 -4 1 3 627.06 17.13
 4 1 -2 588.01 16.56
 -4 1 2 619.86 17.38
 -4 1 2 623.72 16.75
 4 1 -2 636.92 18.07
 4 1 -2 671.79 15.79
 -4 1 2 626.77 16.03
 4 1 -2 652.49 17.35
 -4 1 2 632.96 16.73
 4 1 -1 2794.96 48.44
 -4 1 1 2752.98 49.67
 -4 1 1 2825.53 48.17
 4 1 -1 2872.7 50.73
 4 1 -1 2637.83 48.45
 -4 1 1 2743.19 48.17
 -4 1 1 2668.03 47.7
 4 1 0 537.53 15.83
 -4 1 0 514.56 11.47
 4 1 0 496.64 14.64
 4 1 0 527.12 16.54
 -4 1 0 513.3 16.27
 -4 1 0 541.08 15.07
 -4 1 0 531.15 14.93
 4 1 0 546.11 15.5
 4 1 1 1552.12 32.45
 -4 1 -1 1497.88 26.14
 4 1 1 1515.15 31.26
 4 1 1 1556.87 35.26
 -4 1 -1 1516.63 31.62
 -4 1 -1 1514.82 34.35
 4 1 1 1509.77 31.7
 4 1 1 1533.88 34.49
 4 1 1 1530.19 31.51
 -4 1 -1 1534.16 31.63
 4 1 2 69.05 5.44
 4 1 2 72.94 5.35
 -4 1 -2 75.6 6.54
 4 1 2 67.64 6.19
 4 1 2 76.52 5.66
 -4 1 -2 73.08 3.68
 4 1 2 72.59 5.14
 4 1 3 115.02 7.35
 4 1 3 126.66 7.45
 4 1 3 113.64 8.57
 -4 1 -3 119.69 8.71
 4 1 3 117.09 7.31
 4 1 3 117.54 6.73
 -4 1 -3 103.84 7.29
 4 1 4 212.84 10.97
 4 1 4 201.86 10.17
 -4 1 -4 214.47 11.87
 -4 1 -4 209.18 12.5
 4 1 4 220.96 12.73
 4 1 4 219.84 9.36
 4 1 4 223.45 10.71
 -4 1 -4 237.75 11.69
 4 1 5 113.78 8.33
 4 1 5 119.07 8.28
 4 1 5 129.08 10.28
 4 1 5 116.54 6.69
 4 1 5 134.7 8.55
 -4 1 -5 126.03 9.54
 -4 1 -5 117.42 8.56
 4 1 6 361.41 16.03
 4 1 6 358.71 15.58
 4 1 6 368.83 12.36
 4 1 6 365.86 18.46
 4 1 6 349.22 14.95
 -4 1 -6 356.96 17.25
 -4 1 -6 331.04 15.68
 4 1 7 25.8 4.42
 4 1 7 30.99 5.02
 -4 1 -7 21.22 4.41
 -4 1 -7 17.95 4.41
 4 1 7 33.08 4.72
 4 1 8 30.4 5.06
 4 1 8 22.4 4.61
 -4 1 -8 24.56 4.87
 -4 1 -8 19.84 4.62
 4 1 8 21.56 4.09
 -4 1 -9 8.39 3.68
 4 1 9 11.12 3.83
 -4 1 -9 6.43 3.05
 4 1 9 7.46 2.71
 4 1 9 8.29 3.08
 4 1 10 12.18 3.85
 4 1 10 14.68 4.26
 -4 1 -10 12.49 4.23
 -4 1 -10 11.63 3.88
 4 1 10 18.94 4.2
 4 1 11 0.2 1.57
 -4 1 -11 0.55 2.5
 -4 2 14 12.79 4.78
 4 2 -14 9.03 4.12
 4 2 -14 11.05 3.68
 -4 2 13 0.48 2.08
 4 2 -13 2.31 2.67
 -4 2 13 -0.7 2.37
 4 2 -13 0.43 2.09
 -4 2 12 25.1 5.65
 -4 2 12 52.32 7.79
 4 2 -12 28.34 5.67
 -4 2 12 46.95 6.89
 4 2 -12 36 5.66
 -4 2 11 49.77 7.15
 -4 2 11 39.05 5.93
 4 2 -11 42.13 5.99
 4 2 -11 33.99 5.81
 4 2 -10 8.93 3.31
 -4 2 10 9.87 3.41
 4 2 -10 12.46 2.51
 4 2 -10 8.97 2.76
 -4 2 9 206.6 12.05
 4 2 -9 204.28 12.54
 4 2 -9 200.77 11.69
 4 2 -9 192.7 9.71
 -4 2 9 185.45 8.67
 -4 2 9 203.15 9.62
 -4 2 8 227.37 10.2
 4 2 -8 211.12 11.53
 4 2 -8 207.26 10.25
 -4 2 8 199.31 11.3
 -4 2 8 197.93 8.42
 4 2 -8 192.67 11.63
 -4 2 8 218.18 8.97
 4 2 -8 214.51 7.83
 -4 2 7 277.7 12.68
 4 2 -7 297.26 13.79
 4 2 -7 277.83 12.81
 4 2 -7 274.53 11.86
 -4 2 7 272.82 9.47
 4 2 -7 274.61 7.9
 4 2 -6 721 21.28
 -4 2 6 690.6 20.58
 4 2 -6 744.8 22.28
 4 2 -6 704.55 20.36
 4 2 -6 665.46 13.15
 -4 2 6 719.52 16.7
 -4 2 6 720.5 21.39
 4 2 -5 82.89 6.32
 4 2 -5 96.44 6.83
 4 2 -5 96.09 7.03
 -4 2 5 92.68 6.53
 -4 2 5 93.53 6.45
 4 2 -4 1578.9 34.91
 -4 2 4 1539.09 33.59
 4 2 -4 1630.5 34.66
 4 2 -4 1606.84 30.63
 -4 2 4 1616.53 33.22
 4 2 -4 1609.7 35.18
 -4 2 3 110.89 6.72
 4 2 -3 113.72 7.21
 4 2 -3 113.39 7.37
 -4 2 3 107.74 5.94
 4 2 -3 118.53 6.1
 -4 2 3 128.1 6.53
 -4 2 2 306.14 8.55
 -4 2 2 295.91 10.54
 4 2 -2 303.9 10.52
 -4 2 2 295.07 11.39
 4 2 -2 300.57 12.07
 4 2 -2 283.55 10.46
 4 2 -2 289.31 12.05
 -4 2 2 308.55 10.18
 4 2 -1 1667.79 35.51
 -4 2 1 1552.76 26.14
 -4 2 1 1628.53 34.49
 4 2 -1 1681.53 32.03
 4 2 -1 1615.9 35.36
 -4 2 1 1652.04 31.16
 4 2 -1 1671.43 33.37
 4 2 -1 1591.14 35
 -4 2 1 1623.57 30.92
 4 2 0 135.63 8.28
 4 2 0 143.4 8.63
 -4 2 0 141.4 6.44
 4 2 0 123.94 6.45
 -4 2 0 137.9 8.13
 4 2 0 134.68 7.95
 4 2 0 127.08 7.32
 4 2 0 141.55 8.47
 -4 2 0 138.91 6.39
 4 2 1 481.34 16.82
 -4 2 -1 477.4 13.62
 -4 2 -1 485.04 17.19
 4 2 1 482.22 16.19
 4 2 1 483.34 17.41
 4 2 1 510.65 18.04
 4 2 1 503.32 15.99
 -4 2 -1 470.72 13.52
 4 2 2 80.36 6.62
 -4 2 -2 97.77 7.62
 4 2 2 84.92 6.35
 -4 2 -2 85.01 5.48
 -4 2 -2 85.41 7.34
 4 2 2 92.59 6.67
 4 2 2 89.49 6.82
 4 2 2 94.87 7.81
 -4 2 -2 91.66 5.64
 4 2 3 14.05 2.97
 -4 2 -3 7.66 1.97
 4 2 3 10.23 3.28
 4 2 3 8.45 2.67
 -4 2 -3 6.37 2.79
 4 2 3 11.09 2.82
 -4 2 -3 6.77 2.37
 4 2 3 8.92 2.26
 4 2 4 597.13 21.05
 4 2 4 595.44 20.51
 -4 2 -4 585.67 21.89
 -4 2 -4 616.4 18.41
 4 2 4 595.78 18.46
 4 2 4 600.62 22.97
 -4 2 -4 593.24 22.7
 4 2 4 637.52 20.23
 -4 2 -4 580.52 18.32
 4 2 5 285.25 14.81
 4 2 5 297.5 14.6
 -4 2 -5 315.01 12.57
 -4 2 -5 329.22 16.47
 4 2 5 320.94 12.72
 4 2 5 318.83 17.08
 4 2 5 330.9 14.48
 -4 2 -5 309.79 13.44
 4 2 6 168.35 11.6
 4 2 6 133.97 10.27
 4 2 6 172.32 8.85
 -4 2 -6 169.03 8.95
 -4 2 -6 174.71 12.51
 4 2 6 177.98 10.9
 -4 2 -6 173.43 10.36
 4 2 7 122.31 10.47
 4 2 7 137.83 10.76
 -4 2 -7 140.74 11.72
 4 2 7 139.5 9.89
 -4 2 -7 134.64 9.64
 4 2 8 -3.94 2.58
 -4 2 -8 -2.54 2.94
 4 2 8 0.2 1.99
 -4 2 -8 -2.53 2.05
 4 2 8 -5.12 2.93
 -4 2 -9 -0.73 2.67
 4 2 9 1.47 2.26
 4 2 9 2.94 2.04
 4 2 9 2.23 2.19
 -4 2 -9 3.82 2.25
 4 2 10 1.41 2.51
 4 2 10 5.35 2.94
 -4 2 -10 -0.84 2.61
 4 2 10 4.91 2.56
 4 2 11 12.94 4.81
 4 2 11 16.76 5.3
 -4 3 14 15.82 4.6
 4 3 -14 8.33 3.92
 -4 3 13 5.67 3.11
 -4 3 13 11 3.86
 -4 3 13 10.34 3.66
 4 3 -13 11.04 3.99
 4 3 -13 4.1 3.05
 4 3 -12 10.1 3.61
 -4 3 12 5.74 3.66
 -4 3 12 16.56 4.15
 -4 3 12 6.37 3.17
 4 3 -12 10.62 3.4
 -4 3 11 6.8 3.34
 -4 3 11 0.24 2.09
 4 3 -11 5.14 2.51
 -4 3 11 7.61 3.05
 4 3 -11 11.05 3.57
 -4 3 10 11.07 4.13
 4 3 -10 7.64 2.46
 4 3 -10 14.48 3.64
 -4 3 10 8.71 3.49
 -4 3 10 10.08 3.17
 4 3 -10 8.65 3.24
 4 3 -9 82.23 6.94
 -4 3 9 82.81 8.34
 -4 3 9 85.33 8.57
 -4 3 9 90.57 7.24
 -4 3 9 85.3 7.59
 4 3 -9 80.73 7.81
 4 3 -9 81.92 8.06
 -4 3 8 265.06 14.29
 4 3 -8 269.83 12.8
 -4 3 8 272.52 14.48
 -4 3 8 261.81 12.57
 -4 3 8 261.04 12.97
 4 3 -8 269.87 13.81
 4 3 -8 269.27 14.04
 -4 3 7 59.67 6.32
 -4 3 7 48.22 5.73
 -4 3 7 49.38 5.32
 -4 3 7 44.09 5.06
 -4 3 7 46.9 3.16
 4 3 -7 53.77 5.8
 4 3 -7 47.83 5.4
 4 3 -7 50.62 3.6
 4 3 -7 46.07 5.66
 -4 3 6 1189.47 30.32
 -4 3 6 1181.84 30.18
 4 3 -6 1140.27 30.42
 -4 3 6 1168.2 28.69
 4 3 -6 1144.58 29.78
 4 3 -6 1236.32 31.28
 -4 3 6 1150.66 22.58
 -4 3 6 1225.6 30.33
 -4 3 6 1115.53 22.73
 -4 3 5 36.29 4.63
 4 3 -5 26.54 3.99
 -4 3 5 26.52 3.66
 -4 3 5 29.33 3.87
 4 3 -5 22.06 3.84
 -4 3 5 27.45 2.71
 4 3 -5 25.61 3.97
 -4 3 5 28.48 3.94
 -4 3 4 775.22 20.65
 -4 3 4 765.63 20.45
 -4 3 4 794.73 23.18
 -4 3 4 789.69 20.99
 4 3 -4 763.86 21.99
 4 3 -4 798.93 22.66
 4 3 -4 766.57 23.46
 -4 3 4 758.41 18.43
 -4 3 4 765.76 20.01
 -4 3 3 417.09 13.14
 -4 3 3 449.2 13.42
 -4 3 3 477.15 16.88
 4 3 -3 441.48 16.95
 4 3 -3 421.1 15.26
 -4 3 3 447.17 13.16
 -4 3 3 441.21 14.57
 4 3 -2 80.16 4.9
 -4 3 2 79.23 5.04
 -4 3 2 72.51 4.32
 -4 3 2 71.02 4.34
 4 3 -2 70.15 6.42
 4 3 -2 69.57 5.74
 -4 3 2 75.98 5.75
 4 3 -2 88.96 6.65
 4 3 -2 79.8 5.95
 -4 3 2 82.71 6.73
 -4 3 2 68 4.29
 -4 3 1 979.86 20.99
 4 3 -1 957.55 27.07
 -4 3 1 930.62 18.09
 4 3 -1 953.29 25.58
 -4 3 1 968.61 26.09
 4 3 -1 947.39 20.93
 -4 3 1 979.87 24.67
 4 3 -1 923.08 26.36
 4 3 -1 920.38 24.37
 4 3 -1 952.81 25.46
 -4 3 1 930.66 18.75
 -4 3 1 984.65 19.69
 4 3 0 67.5 6.46
 -4 3 0 55.7 5.37
 -4 3 0 49.78 5.09
 -4 3 0 52 5.37
 -4 3 0 54.14 3.75
 4 3 0 51.92 3.87
 4 3 0 46.94 5.2
 4 3 0 55.05 5.59
 4 3 0 47.39 5.26
 4 3 0 55.14 5.25
 -4 3 0 49.67 3.21
 4 3 1 164.75 10.3
 -4 3 -1 161.84 9.81
 -4 3 -1 163.42 9.54
 4 3 1 162.47 9.73
 4 3 1 155.14 7.09
 -4 3 -1 163.22 6.24
 -4 3 -1 156.97 9.6
 4 3 1 147.27 9.66
 4 3 1 164.04 9.42
 4 3 1 155.97 10.09
 -4 3 -1 156.21 6.14
 4 3 2 92.39 7.97
 4 3 2 86.9 7.57
 -4 3 -2 97.31 8.01
 -4 3 -2 97.04 7.38
 4 3 2 103.74 7.77
 4 3 2 99.58 8.43
 -4 3 -2 89.9 4.86
 -4 3 -2 87.42 7.61
 4 3 2 96.13 7.37
 -4 3 -2 90.86 4.86
 4 3 3 67.05 6.9
 -4 3 -3 75.67 7.45
 -4 3 -3 75.53 6.56
 4 3 3 78.12 7.91
 -4 3 -3 72.86 4.75
 -4 3 -3 71.15 7.29
 4 3 3 68.49 6.5
 4 3 3 67.6 6.92
 4 3 3 64.23 6.21
 -4 3 -3 64.9 4.66
 -4 3 -3 70.43 4.69
 4 3 4 22.99 3.82
 4 3 4 24.57 4.57
 4 3 4 25.19 4.49
 -4 3 -4 25.51 3.16
 -4 3 -4 24.47 4.78
 4 3 4 18.58 3.84
 4 3 4 22.24 4.73
 -4 3 -4 29.34 4.26
 4 3 5 99.89 9.2
 4 3 5 105.26 7.76
 4 3 5 104.48 9.29
 -4 3 -5 97.4 7.59
 -4 3 -5 102.01 9.66
 4 3 5 106.44 8.57
 -4 3 -5 98.71 6.65
 4 3 6 34.95 4.54
 4 3 6 24.44 4.81
 4 3 6 33.43 5.75
 -4 3 -6 29.89 4.27
 -4 3 -6 25.45 3.72
 -4 3 -6 31.38 5.7
 4 3 6 42.26 5.64
 4 3 7 23.75 5.25
 4 3 7 31.48 5.82
 -4 3 -7 24.16 5.85
 4 3 7 29.84 5.14
 4 3 8 24.56 5.59
 4 3 8 24.98 5.44
 -4 3 -8 31.5 6.26
 4 3 8 30.67 5.34
 4 3 9 3.69 3.05
 -4 3 -9 11.31 4.36
 4 3 9 8.07 3.08
 4 3 9 8.24 3.76
 4 3 10 13.96 4.88
 4 3 10 14.38 4.9
 -4 3 -10 5.82 3.33
 4 3 10 13.49 3.85
 -4 4 12 -0.39 1.74
 -4 4 12 -3.59 3.26
 4 4 -12 -1.35 2.11
 -4 4 11 72.06 9.09
 -4 4 11 60.83 8.62
 4 4 -11 60.88 7.4
 4 4 -11 49.71 7.2
 4 4 -10 -0.87 1.81
 -4 4 10 2.2 2.69
 -4 4 10 1.22 2.68
 -4 4 10 1.63 2.07
 4 4 -10 2.47 2.24
 4 4 -10 3.61 2.55
 4 4 -9 247.4 13.66
 -4 4 9 274.57 13.88
 -4 4 9 271.32 16.07
 -4 4 9 301.63 16.82
 -4 4 9 258.02 13.96
 4 4 -9 273.89 15.72
 4 4 -9 269.87 14.41
 -4 4 8 23.64 4.64
 -4 4 8 34.84 5.48
 -4 4 8 28.87 4.73
 4 4 -8 30.08 4.69
 -4 4 8 23.92 3.95
 4 4 -8 25.19 4.38
 4 4 -8 25.05 4.72
 4 4 -7 48.51 6.2
 4 4 -7 53.71 6.17
 -4 4 7 73.01 7.4
 -4 4 7 56.31 6.54
 -4 4 7 63.31 6.78
 -4 4 7 63.1 5.85
 4 4 -7 64.43 6.29
 4 4 -6 78.76 7.53
 -4 4 6 81.74 7.24
 -4 4 6 77.53 7.14
 -4 4 6 71.73 3.85
 -4 4 6 88.15 7.95
 -4 4 6 86.56 6.54
 4 4 -6 82.37 6.87
 4 4 -6 78.11 7.41
 4 4 -5 66.57 6.91
 -4 4 5 60.04 5.89
 -4 4 5 55.85 5.8
 -4 4 5 70.89 4.43
 4 4 -5 66.2 4.91
 -4 4 5 69.92 5.64
 4 4 -5 69.64 6.11
 4 4 -5 73.93 6.94
 -4 4 5 61 6.52
 -4 4 4 77.14 6.08
 4 4 -4 67.77 7.01
 -4 4 4 82.24 6.45
 -4 4 4 80.88 5.26
 -4 4 4 89.77 7.89
 4 4 -4 86.59 5.92
 -4 4 4 78.92 5.9
 4 4 -4 71.16 6.15
 4 4 -4 74.38 6.7
 -4 4 4 79.53 5.17
 4 4 -3 52.67 5.29
 -4 4 3 50.87 4.53
 -4 4 3 64.53 5.29
 4 4 -3 62.53 6.67
 -4 4 3 54.89 6.25
 4 4 -3 43.64 4.41
 -4 4 3 57.73 4.85
 -4 4 3 60.81 5.19
 4 4 -3 60.11 5.87
 -4 4 2 304.01 10.55
 -4 4 2 302.1 10.61
 -4 4 2 299.27 11.15
 4 4 -2 299.58 14.86
 -4 4 2 310.7 14.98
 -4 4 2 298.05 12.32
 4 4 -2 307.61 12.97
 -4 4 2 300.75 12.37
 4 4 -2 307.62 13.41
 -4 4 1 310.45 9.82
 -4 4 1 316.52 9.56
 4 4 -1 326.48 15.54
 -4 4 1 325.53 13.75
 -4 4 1 353.26 16.01
 -4 4 1 331.61 13.52
 4 4 -1 340.78 14.58
 4 4 -1 340.23 14.35
 4 4 0 57.12 6.58
 -4 4 0 47.17 3.09
 4 4 0 59.32 6.61
 4 4 0 53.1 5.81
 -4 4 0 42.93 5.35
 -4 4 0 41.45 5.5
 -4 4 0 47.37 5.24
 4 4 0 54.17 5.88
 4 4 0 48.5 5.6
 4 4 0 50.99 3.34
 4 4 1 315.01 15.91
 -4 4 -1 290.12 7.8
 -4 4 -1 313.35 15.13
 -4 4 -1 301.78 14.64
 4 4 1 289.56 9.06
 4 4 1 310.09 15.09
 4 4 1 312.88 15.18
 -4 4 -1 307.42 14.31
 4 4 1 307.68 14.43
 4 4 2 425.51 19.31
 4 4 2 445.18 18.44
 -4 4 -2 443.91 18.63
 -4 4 -2 466.35 19.3
 4 4 2 453.75 19.58
 -4 4 -2 435.5 18.28
 4 4 2 458.22 18.37
 -4 4 -2 428.51 10.19
 4 4 3 60.53 7.38
 4 4 3 65.43 6.97
 -4 4 -3 81.69 8.34
 4 4 3 75.51 7.49
 -4 4 -3 76.89 7.51
 4 4 3 74.94 8.09
 4 4 4 357.32 16.45
 4 4 4 371.45 18.87
 -4 4 -4 365.45 16.75
 -4 4 -4 356.81 18.46
 4 4 4 406.4 17.93
 4 4 4 352.34 18.22
 4 4 5 50.14 6.15
 4 4 5 58.72 7.66
 -4 4 -5 56.99 6.48
 -4 4 -5 71.16 8.67
 4 4 5 56.54 7.58
 4 4 5 62.83 7.08
 4 4 6 3.89 2.23
 4 4 6 2.38 2.51
 -4 4 -6 1.03 1.56
 -4 4 -6 2.7 3.09
 4 4 6 0.44 2.41
 4 4 6 0.03 2.07
 4 4 7 23.76 5.7
 4 4 7 27.89 5.69
 -4 4 -7 21.61 5.45
 4 4 7 18.82 4.61
 4 4 8 14.95 4.62
 4 4 8 14.61 4.74
 4 4 8 16.95 4.18
 -4 4 -8 10.9 4.22
 4 4 9 8.38 3.9
 4 4 9 7.14 4.12
 4 4 9 7.73 3.42
 -4 5 11 1.67 2.54
 -4 5 11 6.08 3.61
 4 5 -11 2.3 2.54
 -4 5 10 11.86 4.4
 -4 5 10 10.13 3.74
 4 5 -10 13.91 4.49
 4 5 -9 0.91 2.21
 -4 5 9 1.13 2.18
 -4 5 9 6.9 3.52
 -4 5 9 6.53 2.75
 4 5 -9 9.72 3.66
 4 5 -8 67.3 7.75
 -4 5 8 87.52 8.98
 -4 5 8 79.51 8.64
 -4 5 8 80.27 8.58
 4 5 -8 70.62 8.09
 4 5 -7 8.49 3.3
 -4 5 7 9.36 2.94
 -4 5 7 9.88 3.24
 -4 5 7 11.37 3.49
 4 5 -7 7.75 2.53
 4 5 -7 2.63 2.48
 4 5 -6 108.87 9.8
 -4 5 6 113.13 9.17
 -4 5 6 120.26 9.64
 -4 5 6 126.51 10.55
 4 5 -6 114.19 9.66
 4 5 -6 109.62 8.04
 4 5 -5 130.25 10.65
 -4 5 5 115.67 8.9
 -4 5 5 127.37 9.54
 -4 5 5 134.04 10.82
 -4 5 5 136.49 7.89
 4 5 -5 139.84 10.22
 4 5 -5 131.91 8.66
 4 5 -4 154.94 10.52
 4 5 -4 158.47 11.84
 -4 5 4 167.78 10.01
 -4 5 4 173.25 10.44
 4 5 -4 154.75 9.47
 -4 5 4 177.13 12.45
 -4 5 4 178.25 8.34
 4 5 -4 160.77 8.33
 -4 5 4 184.23 9.2
 4 5 -3 359.5 17.93
 -4 5 3 352.98 13.84
 -4 5 3 334.01 14.28
 -4 5 3 360.96 17.89
 -4 5 3 323.12 12.86
 -4 5 3 355.13 13.42
 4 5 -3 320.51 14.21
 4 5 -3 339.8 15.22
 4 5 -3 355.05 13.66
 -4 5 2 98.28 6.96
 4 5 -2 73.34 7.89
 -4 5 2 88.81 6.06
 -4 5 2 89.83 8.9
 -4 5 2 84 6.74
 4 5 -2 83 6.81
 -4 5 2 92.32 6.78
 4 5 -2 83.62 7.18
 4 5 -1 268.38 15.25
 -4 5 1 260.57 9.59
 4 5 -1 231.28 12.44
 -4 5 1 255.26 15.01
 -4 5 1 222.47 11.96
 4 5 -1 255.86 12.9
 -4 5 1 239.11 11.78
 4 5 0 47.19 6.5
 4 5 0 48.37 6.56
 -4 5 0 49.53 5.55
 -4 5 0 43.34 5.52
 -4 5 0 33.29 5.48
 4 5 1 75.31 8.06
 4 5 1 75.65 8.36
 -4 5 -1 72.6 8.13
 -4 5 -1 57.37 6.83
 -4 5 -1 77.92 7.3
 4 5 2 8.83 3.09
 4 5 2 5.91 2.5
 -4 5 -2 12.64 3.72
 -4 5 -2 9.49 3.09
 4 5 3 74.94 8.25
 4 5 3 75.2 8.77
 -4 5 -3 71.68 7.99
 -4 5 -3 71.2 8.17
 4 5 4 2.99 2.3
 4 5 4 1.58 2.66
 4 5 4 2.37 2.42
 -4 5 -4 4.27 2.59
 -4 5 -4 -0.29 1.79
 4 5 5 6.95 3.26
 4 5 5 4.7 3.06
 4 5 5 4.33 3.19
 -4 5 -5 8.51 3.13
 -4 5 -5 4.24 2.92
 4 5 6 -0.63 2.73
 -4 5 -6 -0.16 2.16
 4 5 6 -0.06 2.29
 -4 5 -6 1.82 2.19
 4 5 7 22.75 5.64
 4 5 7 29.87 6.46
 -4 5 -7 17.08 4.9
 -4 6 10 5.09 3.44
 -4 6 10 12.13 4.34
 -4 6 9 49.39 7.59
 -4 6 9 52.37 8.01
 -4 6 9 44.95 7.42
 4 6 -9 44.56 7.1
 -4 6 8 20.04 5.06
 -4 6 8 20.36 5.01
 -4 6 8 34.59 6.45
 4 6 -8 22.65 5.21
 -4 6 7 26.12 5.41
 -4 6 7 28.13 5.4
 -4 6 7 23.5 5.35
 4 6 -7 20.89 4.79
 4 6 -6 2.17 2.29
 -4 6 6 2.01 2.13
 -4 6 6 0.5 1.4
 -4 6 6 4.21 2.84
 4 6 -6 -0.16 1.72
 4 6 -5 0.34 2.2
 -4 6 5 3.24 2.08
 -4 6 5 2.12 1.77
 -4 6 5 -1.34 2.48
 4 6 -5 -5.04 2.73
 4 6 -4 37.84 6.59
 -4 6 4 27.53 4.46
 -4 6 4 32.29 4.98
 4 6 -4 37.06 5.59
 -4 6 4 40.43 6.74
 4 6 -3 9.68 3.78
 -4 6 3 16.85 3.48
 -4 6 3 21.64 5.31
 4 6 -2 105.66 10.43
 -4 6 2 105.74 10.56
 -4 6 2 101.99 7.78
 4 6 -1 33.36 6.13
 -4 6 1 30.03 5.71
 -4 6 1 27.7 4.45
 4 6 0 29.69 5.93
 -4 6 0 25.48 4.61
 -4 6 0 30.8 5.85
 4 6 0 24.82 5.36
 4 6 1 32.54 6.18
 4 6 1 41.4 6.95
 -4 6 -1 35.94 5.74
 -4 6 -1 30.38 6.17
 4 6 2 143.39 12.91
 -4 6 -2 130.03 11.79
 -4 6 -2 118.36 10.59
 4 6 2 145.74 12.38
 4 6 3 34.64 6.74
 -4 6 -3 42.01 6.97
 -4 6 -3 31.14 5.94
 4 6 3 40.43 6.81
 4 6 4 93.17 10.98
 -4 6 -4 82.71 9.42
 -4 6 -4 99.72 10.5
 4 6 5 21.12 5.73
 4 6 5 14.74 4.83
 -4 6 -5 16.4 4.6
 -4 6 -5 23.56 5.51
 -4 6 -6 13.19 4.25
 -4 6 -6 11.81 4.43
 -4 7 8 9.08 3.74
 -4 7 8 15.4 4.94
 -4 7 8 12.66 3.9
 -4 7 7 4.62 3.19
 -4 7 7 4.79 2.45
 -4 7 7 3.44 3.12
 4 7 -7 6.8 3.81
 -4 7 6 9.52 3.67
 -4 7 6 15.23 4.92
 4 7 -6 13.33 4.38
 -4 7 5 32.96 7.03
 4 7 -5 41.52 6.49
 -4 7 4 39.86 7.42
 4 7 -4 45.7 6.64
 -4 7 3 83.64 10.43
 -4 7 2 54.31 8.62
 -4 7 1 42.27 7.77
 -4 7 0 27.02 6.28
 4 7 1 2.41 2.71
 -4 7 -1 3.15 2.33
 4 7 2 1.13 2.51
 -4 7 -2 2.43 2.56
 -4 7 -2 4.44 2.81
 -4 7 -3 6.3 3.32
 -4 7 -3 3.78 3.18
 4 7 3 5.72 3.73
 -4 7 -4 0.88 2.31
 -4 7 -4 -4.07 2.63
 -4 7 -5 -0.89 2.18
 -5 -7 7 6.99 4
 5 -7 -6 32.94 7.3
 -5 -7 6 32.86 6.74
 5 -7 -5 2.9 3.51
 -5 -7 5 9.25 3.84
 5 -7 -4 30.65 7.52
 -5 -7 4 19.45 5.35
 5 -7 -3 48.03 8.78
 -5 -7 3 50.07 7.36
 5 -7 -2 25.75 6.72
 5 -7 -1 69.52 10.26
 -5 -7 1 56.88 7.59
 5 -7 0 12.54 5.14
 -5 -7 0 3.49 3.02
 5 -7 1 15.54 5.43
 5 -7 1 4.93 3.15
 5 -7 2 4 3.12
 -5 -7 -2 3.2 2.56
 5 -7 3 8.86 3.74
 -5 -7 -4 6.96 3.37
 -5 -7 -4 8.27 3.73
 5 -6 -10 -5.02 2.93
 5 -6 -10 -1.76 2.79
 -5 -6 9 20.79 5.85
 5 -6 -9 31.3 5.96
 5 -6 -9 33.06 7
 -5 -6 8 25.71 6.6
 5 -6 -8 35.53 6.07
 5 -6 -8 31.26 6.58
 5 -6 -7 68.73 9.32
 -5 -6 7 57.87 8.83
 5 -6 -6 64.4 8.81
 -5 -6 6 48.39 7.5
 5 -6 -5 29.01 6.47
 -5 -6 5 26.28 5.74
 5 -6 -4 10.35 3.83
 -5 -6 4 8.44 3.48
 -5 -6 3 2.21 1.74
 5 -6 -3 11.04 4.28
 -5 -6 3 7.35 2.64
 -5 -6 3 6.43 2.96
 5 -6 -2 22.47 5.43
 -5 -6 2 18.08 4.05
 -5 -6 2 26.56 4.83
 -5 -6 2 14.01 3.68
 -5 -6 2 22.76 4.26
 5 -6 -1 17.33 5.22
 -5 -6 1 16.42 3.94
 -5 -6 1 11.23 3.34
 5 -6 -1 10.74 3.05
 -5 -6 1 9.65 2.9
 -5 -6 1 13.73 3.7
 -5 -6 0 49.34 6.73
 5 -6 0 63.54 7.19
 -5 -6 0 63.81 7.64
 -5 -6 0 65.29 6.91
 5 -6 0 83.33 10.22
 -5 -6 0 68.16 8.03
 -5 -6 -1 23.8 5.04
 5 -6 1 24.07 5.9
 -5 -6 -1 17.64 4.47
 5 -6 1 30.29 5.42
 -5 -6 -2 9.78 3.43
 5 -6 2 12.64 4.83
 -5 -6 -2 5.81 3.27
 5 -6 2 12.94 4.22
 5 -6 3 8.46 4.1
 -5 -6 -3 2.21 2.32
 5 -6 3 2.41 2.53
 5 -6 4 64.07 9.18
 -5 -6 -4 65.7 9.15
 5 -6 4 46.47 7.61
 -5 -6 -5 3.26 3.28
 5 -6 5 1.45 3.02
 -5 -5 12 -1.53 2.26
 5 -5 -12 10.52 4.2
 -5 -5 11 3.68 2.44
 5 -5 -11 14.53 4.83
 5 -5 -11 17.97 5.22
 -5 -5 10 12.1 3.81
 -5 -5 10 15.14 5.03
 5 -5 -10 20.77 4.85
 5 -5 -10 9.03 3.71
 -5 -5 9 0.61 1.57
 -5 -5 9 -2.62 3.2
 5 -5 -9 -1.03 1.71
 5 -5 -9 -0.86 2.31
 -5 -5 8 -0.1 1.35
 -5 -5 8 -2.9 2.84
 5 -5 -8 -1.02 1.95
 5 -5 -8 1.93 1.89
 -5 -5 8 1.89 1.67
 -5 -5 7 52.02 6.03
 -5 -5 7 57.02 7.94
 -5 -5 7 57.23 6.27
 5 -5 -7 52.93 6.63
 5 -5 -7 56.95 7.86
 5 -5 -6 60.48 7.85
 -5 -5 6 56.69 5.91
 5 -5 -6 66.76 6.69
 -5 -5 6 58.57 7.68
 -5 -5 6 67.13 6.79
 5 -5 -5 16.57 4.37
 -5 -5 5 13.24 3.38
 5 -5 -5 15.33 3.11
 -5 -5 5 14.43 2.96
 -5 -5 5 13.76 3.94
 -5 -5 4 69.72 5.67
 -5 -5 4 73.26 8
 -5 -5 4 60.19 5.74
 5 -5 -4 75.87 8.8
 -5 -5 4 80.99 7.56
 -5 -5 3 91.03 7.16
 -5 -5 3 90.84 8.61
 5 -5 -3 100.44 10.14
 -5 -5 3 91.84 8.21
 5 -5 -2 46.51 7.13
 -5 -5 2 40.7 5.65
 -5 -5 2 58.08 5.98
 5 -5 -1 133.5 9.37
 -5 -5 1 147.54 9.91
 5 -5 -1 131.44 11.79
 -5 -5 1 134.05 10.26
 -5 -5 0 1.74 2
 5 -5 0 2.43 3.26
 -5 -5 0 1.56 2.02
 5 -5 0 1.28 1.86
 -5 -5 -1 68.76 7.81
 5 -5 1 62.06 7.13
 5 -5 1 79.63 9.48
 -5 -5 -1 77.05 8.5
 5 -5 2 21.66 5.16
 -5 -5 -2 32.55 6.01
 5 -5 2 27.23 5.28
 5 -5 3 25.6 5.36
 -5 -5 -3 17.76 4.87
 5 -5 3 17.34 4.47
 5 -5 4 0.01 2.14
 -5 -5 -4 3.37 2.66
 5 -5 4 -2.66 2.72
 5 -5 5 18.04 5.03
 -5 -5 -5 21.33 5.6
 5 -5 5 17.33 5.1
 5 -5 6 4.06 3.17
 -5 -5 -6 2.83 3.32
 5 -4 -13 9.07 4.01
 -5 -4 12 4.22 3.1
 -5 -4 12 5.38 3.83
 5 -4 -12 2.32 2.79
 5 -4 -12 6.08 3.23
 -5 -4 11 35.87 6.31
 -5 -4 11 40.11 7.72
 5 -4 -11 31.14 6.02
 -5 -4 10 -1.24 2.72
 -5 -4 10 -0.43 2.14
 5 -4 -10 2.32 1.9
 5 -4 -10 3.95 2.47
 -5 -4 10 1.41 1.97
 -5 -4 9 7.24 3.17
 -5 -4 9 8.96 3.69
 5 -4 -9 15.34 4.21
 5 -4 -9 5.51 2.89
 -5 -4 9 12.25 3.41
 -5 -4 8 37.92 5.38
 -5 -4 8 46.2 6.01
 -5 -4 8 34.76 6.26
 5 -4 -8 44.87 6.33
 5 -4 -8 50.98 6.83
 -5 -4 7 33.2 4.82
 -5 -4 7 33.59 4.96
 -5 -4 7 40.51 6.47
 5 -4 -7 36.67 5.48
 5 -4 -7 38.48 5.73
 -5 -4 6 110.53 8.26
 5 -4 -6 105.63 8.31
 -5 -4 6 115.31 9.95
 5 -4 -6 113.64 9.61
 -5 -4 6 114.87 5.99
 -5 -4 6 107.03 8.44
 5 -4 -5 20.82 4.23
 -5 -4 5 17.39 3.46
 -5 -4 5 17.19 2.49
 5 -4 -5 19.33 3.32
 -5 -4 5 17.78 3.13
 -5 -4 5 29.36 4.82
 5 -4 -4 47.98 6.31
 5 -4 -4 56.85 5.25
 -5 -4 4 42.89 4.57
 -5 -4 4 51.34 4.33
 -5 -4 4 50.47 5.76
 -5 -4 3 63.37 5.17
 5 -4 -3 58.09 4.89
 -5 -4 3 63.12 5.11
 5 -4 -3 65.44 7.38
 -5 -4 3 68.04 6.71
 -5 -4 2 292.9 11
 5 -4 -2 265.19 9.9
 5 -4 -2 258.54 14.92
 -5 -4 2 268.02 13.78
 5 -4 -1 98.34 7.54
 5 -4 -1 96.71 9.09
 5 -4 -1 85.54 4.84
 -5 -4 1 90.09 7.98
 -5 -4 1 85.79 5.65
 5 -4 0 156.31 6.3
 5 -4 0 166.48 10.62
 5 -4 0 184.31 12.73
 -5 -4 0 183.16 11.91
 -5 -4 0 184.58 8.42
 -5 -4 -1 483.62 15.45
 5 -4 1 495.06 19.79
 -5 -4 -1 500.83 21.56
 5 -4 1 524.09 22.54
 -5 -4 -1 535.63 21.72
 5 -4 2 5.66 3.16
 -5 -4 -2 5.2 2.96
 -5 -4 -2 0.76 1.36
 5 -4 2 6.26 3.08
 5 -4 3 486.16 16.68
 5 -4 3 470.07 21.12
 5 -4 3 494.68 22.35
 -5 -4 -3 462.66 22.22
 5 -4 4 35.2 6.21
 -5 -4 -4 22.25 5.68
 5 -4 4 31.77 5.7
 5 -4 5 -4.59 3.13
 -5 -4 -5 0.74 2.77
 5 -4 5 2.11 2.8
 5 -4 6 24.22 5.46
 -5 -4 -6 15.6 5.36
 5 -4 6 30.78 6.23
 5 -4 7 28.46 6.19
 -5 -4 -7 19.67 5.79
 5 -4 7 15.27 4.84
 5 -4 8 2.95 2.54
 -5 -3 13 4.71 3.08
 -5 -3 13 7.08 4.05
 5 -3 -13 5.81 3.57
 -5 -3 12 23.44 5.62
 -5 -3 12 29.52 6.46
 5 -3 -12 11.15 4.34
 5 -3 -11 113.52 11.05
 -5 -3 11 98.13 10.12
 -5 -3 11 93.34 10.43
 5 -3 -10 70.34 8.37
 -5 -3 10 82.43 8.68
 5 -3 -10 99.6 8.91
 -5 -3 10 77.73 9.17
 -5 -3 10 80.03 8.18
 5 -3 -9 78.59 8.45
 -5 -3 9 67.83 7.49
 5 -3 -9 79.24 7.66
 -5 -3 9 81.5 8.84
 -5 -3 9 73.28 7.49
 5 -3 -8 61.97 7.15
 -5 -3 8 67.85 6.98
 5 -3 -8 63.93 6.65
 -5 -3 8 62.23 7.62
 -5 -3 8 63.93 6.71
 5 -3 -7 242.45 13.6
 -5 -3 7 275.43 13.69
 5 -3 -7 245.21 12.99
 -5 -3 7 269.3 14.92
 -5 -3 7 272.6 13.58
 -5 -3 6 395.2 15.78
 5 -3 -6 401 16.43
 5 -3 -6 390.94 16.24
 -5 -3 6 355.81 8.34
 -5 -3 6 399.13 16.35
 5 -3 -5 4.47 2.15
 -5 -3 5 7.62 2.73
 -5 -3 5 8.3 1.3
 5 -3 -5 10.72 2.72
 -5 -3 5 9.48 2.69
 5 -3 -4 886.78 24.13
 -5 -3 4 923.51 24.22
 -5 -3 4 893.25 18.83
 5 -3 -4 910.89 26.54
 -5 -3 4 947.76 26.79
 5 -3 -3 318.01 12.29
 -5 -3 3 313.48 12.31
 -5 -3 3 333.16 10.46
 5 -3 -3 341.71 15.24
 -5 -3 3 334.96 14.84
 -5 -3 2 649.92 18.32
 5 -3 -2 648.64 17.78
 5 -3 -2 646.37 22.23
 -5 -3 2 663.84 21.89
 5 -3 -1 572.27 15.68
 -5 -3 1 573.28 16.77
 5 -3 -1 552.79 20.6
 -5 -3 1 560.98 20.28
 -5 -3 0 40.94 5.38
 5 -3 0 34.93 5.28
 5 -3 0 32.23 3.22
 -5 -3 0 29 3.55
 5 -3 0 32.84 4.41
 5 -3 1 -1.34 1.98
 5 -3 1 -0.97 0.91
 -5 -3 -1 0.15 1.17
 5 -3 1 -1.92 1.78
 -5 -3 -2 133.14 8.41
 5 -3 2 133.79 9.78
 -5 -3 -2 146.49 11.17
 5 -3 2 152.84 10.97
 5 -3 3 129.38 8.42
 -5 -3 -3 124.28 8.62
 5 -3 3 141.87 10.51
 -5 -3 -3 128.8 10.77
 5 -3 3 119.49 10.01
 5 -3 4 185.62 10.5
 5 -3 4 182.55 12.65
 -5 -3 -4 199.9 14.06
 5 -3 4 201.68 13.3
 -5 -3 -5 66.75 8.72
 5 -3 5 80.64 7.1
 5 -3 5 58.31 7.53
 5 -3 5 82.53 8.91
 5 -3 6 87.27 9.55
 5 -3 6 72.92 8.72
 -5 -3 -6 86.31 9.9
 5 -3 7 46.35 7.32
 -5 -3 -7 50.87 8.1
 5 -3 7 64.24 8.53
 5 -3 8 48.81 7.94
 -5 -3 -8 51.73 8.38
 5 -3 8 64.81 8.94
 -5 -2 14 -0.92 2.52
 -5 -2 13 23.77 5.6
 -5 -2 13 18.15 5.21
 5 -2 -13 20.36 5.47
 -5 -2 12 14.05 4.3
 -5 -2 12 15.29 4.63
 5 -2 -12 24.55 5.46
 -5 -2 11 40.7 6.5
 -5 -2 11 54.55 7.72
 5 -2 -11 45.75 7.04
 5 -2 -10 139.48 11.46
 -5 -2 10 132.83 10.91
 -5 -2 10 134.93 11.29
 -5 -2 10 129.98 10.42
 -5 -2 9 99.61 8.92
 5 -2 -9 87.74 8.68
 -5 -2 9 107.38 9.58
 -5 -2 9 109.06 9.14
 5 -2 -8 149.29 10.7
 -5 -2 8 151.04 10.45
 5 -2 -8 147 8.97
 -5 -2 8 147.68 10.71
 -5 -2 8 144.94 10.11
 -5 -2 7 40.86 5.33
 5 -2 -7 45.4 4.87
 -5 -2 7 46.44 5.54
 5 -2 -7 38.93 5.28
 -5 -2 6 277.09 13.06
 5 -2 -6 292.27 13.78
 -5 -2 6 274.09 9.06
 5 -2 -6 303.77 12.32
 -5 -2 6 284.36 13.45
 5 -2 -5 11.75 2.61
 -5 -2 5 9.91 2.74
 5 -2 -5 8.61 2.44
 -5 -2 5 9.75 2.63
 -5 -2 5 14.16 2.06
 -5 -2 4 14 2.95
 5 -2 -4 12.41 2.67
 -5 -2 4 10.39 2.33
 -5 -2 4 8.7 0.82
 -5 -2 4 9.7 0.82
 -5 -2 3 215.26 10.06
 5 -2 -3 219.43 10.13
 5 -2 -3 220.13 10.56
 -5 -2 3 236.79 6.91
 -5 -2 3 224.78 11.48
 -5 -2 2 211.4 9.66
 5 -2 -2 206.26 9.39
 5 -2 -2 201.42 10.28
 -5 -2 2 198.37 7.55
 -5 -2 2 215.26 11.18
 -5 -2 1 84.99 5.96
 5 -2 -1 68.17 5.13
 5 -2 -1 79 6.52
 -5 -2 1 78.05 6.78
 -5 -2 0 498.91 16.28
 5 -2 0 521.99 15.61
 5 -2 0 522.55 18.18
 -5 -2 0 530.26 19.14
 -5 -2 -1 946.18 24.92
 5 -2 1 913.06 23.22
 5 -2 1 917.9 26.16
 5 -2 1 995.59 27.05
 -5 -2 -2 161.9 9.56
 5 -2 2 159.12 10.16
 5 -2 2 172.69 10.6
 5 -2 3 197.85 10.98
 5 -2 3 219.69 12.5
 -5 -2 -3 215.17 11.78
 -5 -2 -3 193.21 12.9
 5 -2 3 209.33 12.25
 5 -2 4 62.21 3.36
 5 -2 4 54.98 6.57
 5 -2 4 61.72 3.23
 -5 -2 -4 53.87 6.19
 5 -2 4 61.72 6.28
 5 -2 4 75.66 7.67
 -5 -2 -4 67.15 7.93
 5 -2 5 34.08 5.44
 -5 -2 -5 32.07 6.15
 5 -2 5 34.69 4.99
 5 -2 5 36.26 5.74
 -5 -2 -6 58.94 8.08
 5 -2 6 49.72 6.19
 5 -2 6 54.97 7.39
 5 -2 6 65.57 7.95
 -5 -2 -7 66.4 7.18
 -5 -2 -7 77.63 9.58
 5 -2 7 73.81 8.77
 5 -2 7 85.34 9.35
 -5 -2 -8 23.16 5.6
 5 -2 8 25.45 4.72
 5 -2 8 32.9 6.06
 -5 -2 -9 12.4 4.57
 5 -2 9 12.85 3.52
 5 -2 9 22.94 5.61
 -5 -1 14 31.63 6.63
 -5 -1 14 21.96 5.54
 5 -1 -14 18.84 5.95
 -5 -1 13 2.35 2.03
 -5 -1 13 12.48 4.06
 5 -1 -13 6.89 3.79
 -5 -1 12 5.32 2.93
 -5 -1 12 2.49 2.61
 5 -1 -12 1.52 2.54
 -5 -1 11 7.8 3.5
 -5 -1 11 3.64 2.35
 5 -1 -11 7.42 3.68
 5 -1 -10 60.12 7.61
 -5 -1 10 65.23 7.61
 -5 -1 10 52.02 6.59
 -5 -1 10 59.01 7.06
 -5 -1 9 10.61 3.3
 -5 -1 9 19.13 3.85
 5 -1 -9 16.16 3.84
 -5 -1 9 20.15 4.12
 5 -1 -8 90.2 8.11
 -5 -1 8 88.75 7.83
 -5 -1 8 91.9 8.02
 -5 -1 7 2.63 1.87
 -5 -1 7 2.96 1.83
 5 -1 -7 -0.33 1.65
 5 -1 -7 0.18 0.9
 -5 -1 6 635.86 20.61
 5 -1 -6 615.3 21.19
 5 -1 -6 680.14 17.01
 -5 -1 6 656.16 21.13
 -5 -1 5 118.12 7.9
 5 -1 -5 115.72 8.07
 5 -1 -5 111.73 5.95
 -5 -1 5 101.69 7.49
 -5 -1 4 1961.18 40.68
 5 -1 -4 1976.64 41.67
 5 -1 -4 1914.57 36.79
 -5 -1 4 1978.1 41.92
 -5 -1 3 111.39 7.04
 5 -1 -3 102.8 7
 5 -1 -3 106 6.02
 -5 -1 3 106.47 4.09
 -5 -1 3 120.18 7.99
 -5 -1 2 100 6.64
 5 -1 -2 83.02 6
 5 -1 -2 96.61 5.93
 -5 -1 2 96.43 4.68
 -5 -1 2 101.89 7.23
 -5 -1 1 463.4 15.37
 5 -1 -1 441.19 14.74
 5 -1 -1 446.67 14.4
 -5 -1 1 440.45 12.74
 -5 -1 1 464.08 16.44
 -5 -1 0 305.37 12.52
 5 -1 0 304.11 12.09
 5 -1 0 312.93 12.21
 -5 -1 0 315.42 13.66
 -5 -1 -1 307.97 13.02
 5 -1 1 279.37 11.97
 5 -1 1 280.97 12.17
 5 -1 2 391.18 11.11
 5 -1 2 395.48 16
 -5 -1 -2 395.01 15.95
 5 -1 2 382.15 14.87
 5 -1 2 406.23 15.67
 5 -1 3 84.13 4.92
 5 -1 3 79.83 4.28
 5 -1 3 91.5 7.55
 -5 -1 -3 85.85 7.54
 5 -1 3 88.91 7.52
 -5 -1 -3 82.17 7.98
 5 -1 3 74.64 6.9
 5 -1 4 46.57 4
 -5 -1 -4 29.92 5.29
 5 -1 4 34.36 5.06
 5 -1 4 30.61 4.82
 5 -1 4 40.27 3.42
 -5 -1 -4 43.98 5.77
 5 -1 4 31.94 4.9
 5 -1 5 64.01 5.13
 5 -1 5 74.03 5.22
 5 -1 5 77.03 7.68
 5 -1 5 73.98 7.46
 -5 -1 -5 80.72 8.65
 5 -1 5 68.74 7.46
 5 -1 6 95.2 6.8
 -5 -1 -6 103.29 8.82
 5 -1 6 102.72 9.31
 5 -1 6 118.38 8.93
 5 -1 6 97.05 6.63
 5 -1 6 108.91 9.51
 -5 -1 -6 105.52 10.31
 5 -1 7 22.4 4.68
 -5 -1 -7 22.1 5.3
 -5 -1 -7 13.43 3.73
 5 -1 7 30.31 4.78
 5 -1 7 24.11 5.05
 -5 -1 -8 45.89 7.41
 -5 -1 -8 44.53 6.45
 5 -1 8 53.05 6.49
 5 -1 8 64.01 7.93
 -5 -1 -9 29.72 6.42
 -5 -1 -9 19.84 4.63
 5 -1 9 23.91 4.73
 5 -1 9 24.65 5.61
 -5 -1 -10 3.99 3.69
 5 -1 10 4.83 3.14
 -5 0 14 3.58 2.94
 5 0 -14 -1.55 3.03
 -5 0 13 0.06 2.84
 5 0 -13 0.98 1.69
 -5 0 13 2.34 2.57
 5 0 -13 2.33 3.14
 -5 0 12 0.61 2.02
 5 0 -12 -2.23 2.03
 -5 0 12 -0.17 1.75
 5 0 -12 -0.1 2.77
 5 0 -11 149.24 12.06
 -5 0 11 161.47 12.26
 5 0 -11 151.93 9.95
 -5 0 11 157.66 11.11
 5 0 -10 7.8 2.13
 -5 0 10 8.46 3.59
 -5 0 10 7.93 3.06
 5 0 -10 15.2 4.06
 -5 0 9 276.4 14.84
 5 0 -9 291.95 15.92
 -5 0 9 293.79 13.87
 5 0 -9 288.7 11.65
 -5 0 9 269.4 14.69
 -5 0 8 -1.14 1.66
 5 0 -8 2.44 1.34
 5 0 -8 0.58 2.16
 -5 0 8 1.85 1.96
 -5 0 7 186.61 10.84
 5 0 -7 195.43 11.58
 5 0 -7 194.65 5.39
 5 0 -7 187.04 6.62
 -5 0 7 190.88 11.04
 5 0 -6 34.23 4.75
 -5 0 6 37.34 4.63
 5 0 -6 39.6 2.67
 5 0 -6 41.1 2.6
 -5 0 6 44.3 5.04
 -5 0 5 9.16 2.44
 5 0 -5 16.43 3.23
 -5 0 5 9.88 2.45
 5 0 -5 12.8 1.39
 -5 0 4 128.12 7.93
 -5 0 4 137.77 4.9
 5 0 -4 133.13 4.81
 5 0 -4 129.4 8.28
 -5 0 4 144.67 8.48
 -5 0 3 309.33 12.46
 5 0 -3 318.97 12.94
 -5 0 3 300.82 8.88
 5 0 -3 301.24 8.59
 -5 0 3 326.87 12.92
 5 0 -2 727.16 20.66
 5 0 -2 705.56 16.22
 -5 0 2 762.76 20.99
 -5 0 2 750.26 20.7
 -5 0 1 20.19 3.26
 -5 0 1 21.45 2.66
 5 0 -1 20.11 2.48
 -5 0 1 20.39 2.66
 -5 0 1 11.32 2.55
 5 0 -1 13.1 2.64
 -5 0 0 286.43 10.3
 -5 0 0 293.37 12.55
 5 0 0 294.2 12.33
 -5 0 0 274.97 9.09
 5 0 0 282.38 10.68
 -5 0 0 280.98 12.18
 5 0 1 1289.08 27.82
 -5 0 -1 1314 27.68
 -5 0 -1 1261.12 25.69
 -5 0 -1 1300.7 31.96
 5 0 1 1273.2 31.33
 5 0 1 1304.79 29.52
 -5 0 -1 1302.16 31.55
 -5 0 -2 12.34 1.96
 5 0 2 17.34 2.36
 5 0 2 8.61 2.58
 5 0 2 14.26 3.22
 5 0 2 3.98 1.63
 5 0 2 10.51 2.58
 -5 0 -2 9.46 2.83
 5 0 3 738.57 20.14
 5 0 3 730.26 19.04
 5 0 3 770.92 24.95
 -5 0 -3 759.81 25.25
 5 0 3 768.76 22.26
 -5 0 -3 760.2 24.58
 5 0 3 790.18 20.66
 5 0 4 64.05 5.47
 -5 0 -4 62.98 7.12
 5 0 4 61.46 5.01
 5 0 4 54.03 6.51
 5 0 4 57.81 5.87
 -5 0 -4 69.56 7.2
 5 0 4 74.78 5.48
 5 0 5 35.12 4.16
 5 0 5 34.12 4.29
 -5 0 -5 39.85 5.89
 5 0 5 33.79 5.45
 5 0 5 46.04 5.4
 5 0 5 38.65 4.06
 5 0 6 19.06 2.94
 5 0 6 18.04 3.42
 5 0 6 21.93 3.84
 -5 0 -6 17.58 4.45
 5 0 6 27.23 5.19
 -5 0 -6 32.28 5.28
 5 0 6 27.64 4.45
 5 0 7 50.4 5.69
 5 0 7 35.08 4.95
 5 0 7 28.66 5.48
 -5 0 -7 31.23 5.58
 -5 0 -7 38.06 6.19
 5 0 7 39.85 5.39
 5 0 8 0.01 1.96
 -5 0 -8 -0.41 1.9
 -5 0 -8 0.13 1.64
 5 0 8 -0.53 1.57
 -5 0 -9 -3.33 3.09
 -5 0 -9 5.14 2.9
 5 0 9 -1.51 2.14
 -5 0 -10 5.27 3.55
 -5 0 -10 17.63 4.65
 5 0 10 19.46 4.26
 5 1 -14 25.12 6.35
 -5 1 14 23.52 5.98
 5 1 -14 20.81 4.55
 -5 1 13 5.99 3.49
 5 1 -13 8.71 3.98
 5 1 -13 7.69 3.09
 5 1 -12 9.75 3.76
 -5 1 12 5.56 3.21
 5 1 -12 3.17 2.12
 5 1 -11 7.51 3.29
 -5 1 11 6.68 2.93
 5 1 -11 1.48 1.92
 -5 1 11 8.17 2.58
 -5 1 10 68.11 7.56
 5 1 -10 66.24 7.81
 5 1 -10 74.69 7.09
 5 1 -10 52.65 5.07
 -5 1 10 64.36 6.16
 -5 1 9 20.94 4.17
 5 1 -9 14.95 2.92
 5 1 -9 21.31 4.48
 5 1 -9 19.55 3.74
 -5 1 9 17.85 3.33
 -5 1 8 92.72 7.92
 5 1 -8 106.16 8.89
 5 1 -8 96.29 7.49
 5 1 -8 99.77 6.96
 5 1 -8 83.53 3.58
 -5 1 8 93.87 8.13
 5 1 -7 2.56 1.49
 5 1 -7 2.48 1.78
 -5 1 7 2.94 1.6
 -5 1 7 1.31 1.86
 -5 1 6 575.47 19.69
 5 1 -6 650.63 21.52
 5 1 -6 630.36 13.81
 5 1 -6 608.14 18.62
 -5 1 6 621.55 20.18
 -5 1 5 103.84 7.39
 5 1 -5 106.14 7.99
 5 1 -5 114.92 5.31
 5 1 -5 93.13 6.63
 -5 1 5 111.27 7.51
 -5 1 4 1941.84 41.21
 5 1 -4 2020.47 42.96
 5 1 -4 2015.04 36.43
 -5 1 4 1946.37 36.69
 5 1 -4 2001.28 40.72
 -5 1 4 2024.07 41.04
 -5 1 3 97.48 6.87
 5 1 -3 113.61 7.67
 5 1 -3 100.96 5.62
 -5 1 3 105.71 5.78
 5 1 -3 97.56 6.58
 -5 1 3 81.54 6.03
 -5 1 2 85.85 6.43
 5 1 -2 92.53 6.88
 5 1 -2 91.63 5.62
 5 1 -2 86.75 6.22
 -5 1 2 81.19 5.91
 -5 1 1 433.27 11.8
 5 1 -1 426.32 13.86
 -5 1 1 416.41 15.35
 5 1 -1 438.79 15.87
 5 1 -1 435.72 14.78
 -5 1 1 429.63 14.44
 -5 1 0 298.62 8.95
 -5 1 0 301.42 6.97
 -5 1 0 300.9 13.24
 5 1 0 287.75 12.98
 5 1 0 328.11 12.28
 5 1 0 341.69 12.63
 -5 1 0 305.88 12.08
 5 1 1 299.62 12.22
 -5 1 -1 287.78 8.7
 5 1 1 287.67 13.8
 -5 1 -1 290.09 13.58
 5 1 1 306.68 13.92
 5 1 1 293.69 12.01
 5 1 1 298.43 11.94
 -5 1 -1 296.81 12.27
 5 1 2 371.49 14.28
 -5 1 -2 360.57 10.52
 5 1 2 382.18 13.78
 5 1 2 392.32 17.02
 -5 1 -2 405.78 17.02
 5 1 2 406.93 16.87
 5 1 2 404.44 14.87
 5 1 2 389.01 13.96
 5 1 3 75.04 6.31
 5 1 3 78.15 6.16
 -5 1 -3 83.6 7.93
 5 1 3 73.18 7.51
 5 1 3 75.31 6.47
 5 1 3 72.69 5.81
 -5 1 -3 71.87 6.67
 5 1 4 42.22 5.06
 5 1 4 45.3 4.92
 5 1 4 41.9 5.99
 5 1 4 36.03 4.16
 5 1 4 44.66 5.19
 -5 1 -4 36.22 5.71
 -5 1 -4 48.17 5.69
 5 1 5 64.92 6.5
 5 1 5 66.96 6.33
 -5 1 -5 72.11 7.67
 -5 1 -5 57.13 6.51
 5 1 5 59.49 7.34
 5 1 5 61.19 5.36
 5 1 5 78.31 7.08
 5 1 6 106.31 8.77
 5 1 6 103.73 8.39
 -5 1 -6 105.15 9.75
 5 1 6 96.22 9.85
 5 1 6 116.11 7.21
 5 1 6 109.4 8.72
 -5 1 -6 92.59 8.68
 5 1 7 24.05 4.62
 -5 1 -7 20.7 4.63
 5 1 7 18.17 4.05
 5 1 7 25.68 4.55
 -5 1 -7 19.53 4.52
 5 1 8 44.72 6.13
 5 1 8 47.59 6.61
 -5 1 -8 60.46 7.7
 -5 1 -8 38.55 6.67
 5 1 8 53.62 6.57
 5 1 9 24.11 4.89
 5 1 9 18.24 4.42
 -5 1 -9 21.92 4.95
 -5 1 -9 19.67 5.3
 5 1 9 30.63 5.26
 -5 1 -10 1.43 2.28
 -5 1 -10 -0.4 2.29
 5 1 10 -0.42 1.85
 5 2 -14 1.2 3.01
 -5 2 14 1.76 3.03
 5 2 -14 0.21 1.71
 -5 2 13 16.38 4.87
 5 2 -13 11.59 4.6
 -5 2 13 13.55 4.54
 -5 2 13 10.41 4.19
 5 2 -13 16.51 4.32
 5 2 -12 16.75 4.77
 -5 2 12 11.99 4.11
 5 2 -12 22.38 4.6
 5 2 -11 43.02 6.66
 -5 2 11 41.7 6.45
 5 2 -11 45.97 6.38
 -5 2 10 119.88 7.85
 5 2 -10 123.4 8.29
 -5 2 10 105.45 9.39
 5 2 -10 123.45 10.54
 5 2 -10 132.86 10.12
 -5 2 10 122.54 7.71
 -5 2 9 84.93 8.05
 5 2 -9 79.02 6.69
 5 2 -9 87.16 8.59
 5 2 -9 88.2 7.91
 -5 2 9 92.25 6.4
 -5 2 8 141.76 9.83
 5 2 -8 151.81 9.35
 5 2 -8 156.6 10.86
 5 2 -8 156.1 10.17
 5 2 -7 47.1 5.23
 -5 2 7 53.04 5.8
 5 2 -7 62.21 6.76
 5 2 -7 50.07 5.63
 -5 2 7 56.74 6.03
 -5 2 6 292.33 13.24
 5 2 -6 281.14 13.71
 5 2 -6 286.9 13.04
 -5 2 6 299.85 13.23
 5 2 -5 9.81 2.48
 5 2 -5 8.42 2.59
 -5 2 5 12.4 2.71
 5 2 -5 9.63 1.81
 -5 2 5 6.8 2.31
 -5 2 4 7.4 2.06
 5 2 -4 11.16 2.56
 5 2 -4 9.91 2.61
 -5 2 4 9.53 2.42
 5 2 -4 9.02 1.77
 -5 2 3 204.43 10.35
 5 2 -3 235.35 11.49
 5 2 -3 219.66 9.43
 5 2 -3 232.89 11.48
 -5 2 3 232.13 9.82
 -5 2 2 179.71 9.69
 5 2 -2 203.67 10.72
 5 2 -2 199.28 10.46
 -5 2 2 186.92 6.29
 -5 2 2 202.42 8.95
 -5 2 1 94.78 7.11
 5 2 -1 94.72 7.31
 5 2 -1 89.01 6.94
 5 2 -1 87.29 6.2
 -5 2 1 89.32 5.78
 5 2 0 497.41 17.9
 -5 2 0 461.56 8.98
 5 2 0 489.49 18.36
 -5 2 0 531.14 18.39
 5 2 0 498.37 18.4
 5 2 0 501.77 17.3
 5 2 0 504.19 16.64
 -5 2 0 535.12 15.5
 5 2 1 922.78 26.28
 -5 2 -1 957.15 27.48
 5 2 1 903.45 27.34
 5 2 1 899.08 25.07
 5 2 1 915.06 27.61
 5 2 1 916.17 24.95
 -5 2 -1 916.67 22.84
 5 2 2 161.32 10.06
 5 2 2 170.68 11.37
 -5 2 -2 163.78 11.01
 5 2 2 156.6 9.32
 5 2 2 167.54 9.76
 5 2 2 181.8 10.27
 -5 2 -2 151.56 8.37
 5 2 3 222.74 12.19
 5 2 3 199.83 11.29
 -5 2 -3 218.62 12.95
 5 2 3 203.83 13.08
 5 2 3 204.48 10.76
 -5 2 -3 210.23 13.21
 5 2 3 223.21 11.69
 -5 2 -3 215.1 10.91
 5 2 4 78.26 7.43
 5 2 4 54.92 6.19
 -5 2 -4 60.65 7.21
 5 2 4 60.49 7.45
 5 2 4 67.27 6.09
 -5 2 -4 82.05 8.56
 5 2 4 74.33 6.98
 -5 2 -4 57.03 5.83
 5 2 5 33.26 5.17
 5 2 5 33.64 5.13
 -5 2 -5 32.68 4.35
 -5 2 -5 32.6 4.69
 5 2 5 33.42 5.92
 -5 2 -5 28.73 5.33
 5 2 5 37.76 5.19
 5 2 5 34.75 4.42
 5 2 6 52.26 6.45
 5 2 6 49.22 6.48
 -5 2 -6 56.4 5.51
 5 2 6 74.7 9.06
 5 2 6 55.1 5.4
 -5 2 -6 52.39 7.34
 5 2 6 53.16 6.37
 -5 2 -6 58.09 6.51
 5 2 7 70.21 7.9
 5 2 7 63.38 7.81
 -5 2 -7 72.53 8.81
 5 2 7 72.12 7.68
 -5 2 -7 68.91 7.36
 5 2 8 19.82 4.65
 5 2 8 21.94 5.14
 -5 2 -8 23.25 4.94
 -5 2 -8 26.69 5.84
 5 2 8 26.89 5
 5 2 9 11.83 4.31
 5 2 9 11.13 4.02
 -5 2 -9 10.04 4.39
 5 2 9 21.81 4.79
 5 2 10 6.55 3.64
 5 2 10 3.24 2.62
 5 2 10 4.51 2.9
 5 3 -14 2.38 3.34
 -5 3 14 4.05 3.16
 -5 3 13 6.46 3.34
 -5 3 13 10.07 4.01
 5 3 -13 0.56 2.21
 -5 3 13 8.53 3.51
 5 3 -13 5.9 2.98
 -5 3 12 23.21 5.34
 -5 3 12 18.7 4.87
 5 3 -12 23.2 5.3
 -5 3 12 22.81 5.12
 5 3 -12 24.49 5.52
 -5 3 11 84.05 9.31
 -5 3 11 103.62 10.45
 -5 3 11 96.76 9.34
 5 3 -11 94.41 9.63
 5 3 -11 99.17 9.63
 -5 3 10 71.21 8.23
 5 3 -10 78.98 7.3
 -5 3 10 89.61 9.3
 -5 3 10 74.67 6.93
 -5 3 10 72.09 7.62
 5 3 -10 76.01 8.32
 5 3 -10 73.94 8.03
 -5 3 9 77.68 8.03
 -5 3 9 75.61 8.02
 5 3 -9 74.67 7.08
 -5 3 9 75.79 6.93
 -5 3 9 70.35 7.31
 5 3 -9 81.97 8.08
 5 3 -9 63.44 7.32
 -5 3 8 58.04 6.52
 -5 3 8 53.39 6.49
 5 3 -8 51.87 6.01
 -5 3 8 53.73 6.1
 5 3 -8 70.38 7.35
 5 3 -8 55.59 6.59
 -5 3 8 67.15 6.54
 -5 3 7 236.09 12.52
 -5 3 7 246.69 12.8
 -5 3 7 245.4 12.56
 5 3 -7 236.63 12.9
 -5 3 7 241.66 12.54
 5 3 -7 243.36 13.17
 5 3 -7 254.83 13.46
 -5 3 6 420.29 15.81
 -5 3 6 386.2 15.39
 -5 3 6 369.26 15.7
 5 3 -6 382.5 16.54
 -5 3 6 392.13 15.61
 5 3 -6 412.23 16.86
 5 3 -6 380.59 16.39
 -5 3 5 9.16 2.39
 5 3 -5 13.61 3.19
 -5 3 5 5.69 2.26
 5 3 -5 8.05 2.88
 -5 3 5 13.56 2.76
 -5 3 5 8.49 2.36
 -5 3 4 903.75 22.18
 -5 3 4 885.18 22.11
 5 3 -4 872.47 26.49
 -5 3 4 871.03 24.31
 5 3 -4 861.04 25.39
 5 3 -4 876.95 22.81
 -5 3 4 902.04 22.71
 -5 3 3 339.29 11.05
 -5 3 3 333.93 11.05
 5 3 -3 332.35 15.3
 5 3 -3 334.72 14.55
 -5 3 3 341.38 13.9
 5 3 -3 341.96 13.15
 -5 3 3 336.43 11.82
 -5 3 2 669.38 15.31
 -5 3 2 666.62 15.09
 5 3 -2 639.58 21.1
 5 3 -2 652.26 22.25
 -5 3 2 646.57 20.65
 5 3 -2 633.01 21.36
 5 3 -2 706.72 20.5
 -5 3 2 707.41 17.53
 -5 3 1 549.95 11.27
 5 3 -1 599.11 20.5
 5 3 -1 570.26 20.25
 5 3 -1 558.13 20.14
 -5 3 1 557.47 19.42
 5 3 -1 603.63 19.09
 -5 3 1 575.85 15.1
 5 3 0 34.6 4.91
 5 3 0 35.31 5.03
 -5 3 0 35.53 3.29
 5 3 0 29.27 4.58
 5 3 0 31.72 4.34
 -5 3 0 37.35 4.95
 5 3 0 40.31 5.2
 -5 3 0 39.16 3.46
 -5 3 -1 -0.54 0.95
 5 3 1 -0.9 2.09
 5 3 1 0.09 1.52
 -5 3 -1 -1.32 1.67
 -5 3 -1 -0.57 0.86
 5 3 1 1.7 2.13
 5 3 1 -0.11 1.62
 -5 3 -1 1.22 1.71
 5 3 1 0.28 1.25
 5 3 2 148.5 10.6
 -5 3 -2 125.4 9.87
 -5 3 -2 136.2 9.34
 5 3 2 129.98 9.22
 5 3 2 133.07 10.51
 -5 3 -2 150.15 10.78
 5 3 2 138.98 9.55
 -5 3 -2 129.8 6.92
 5 3 3 109.19 9.41
 5 3 3 102.54 8.92
 -5 3 -3 122.37 10.08
 -5 3 -3 119.41 8.78
 5 3 3 130.58 9.21
 5 3 3 121.39 10.53
 -5 3 -3 110.17 9.96
 5 3 3 113.74 8.93
 -5 3 -3 112.02 7.11
 -5 3 -3 106.39 6.74
 5 3 4 177.08 12.31
 5 3 4 170.8 11.87
 5 3 4 172.37 10.78
 -5 3 -4 166 10.46
 -5 3 -4 175.06 12.71
 5 3 4 169.83 13.07
 -5 3 -4 176.72 13.09
 5 3 4 168.48 11.16
 -5 3 -4 166.64 9.3
 -5 3 -4 174.24 9.22
 5 3 5 66.92 7.94
 5 3 5 75.42 7.03
 5 3 5 69.83 7.95
 -5 3 -5 76.6 7.08
 -5 3 -5 76.99 8.85
 5 3 5 84.35 9.65
 5 3 5 85.65 8.17
 -5 3 -5 69.82 6.19
 5 3 6 86.62 7.41
 5 3 6 78.83 8.66
 5 3 6 67.26 8.26
 -5 3 -6 79.27 7.23
 -5 3 -6 83 9.46
 5 3 6 83.88 8.37
 5 3 7 41.19 6.82
 5 3 7 43.01 6.93
 -5 3 -7 41.29 7.3
 5 3 7 56.57 7.17
 5 3 8 50.17 7.74
 5 3 8 38.78 6.78
 -5 3 -8 56.14 8.67
 5 3 8 56.84 7.3
 5 3 9 -0.79 2.18
 5 3 9 3.85 3.19
 -5 3 -9 1.26 2.73
 5 3 9 3.08 2.65
 5 3 10 9.59 4.3
 5 3 10 3.03 2.89
 -5 4 12 1.01 1.96
 -5 4 12 0.52 2.67
 5 4 -12 2.86 2.88
 -5 4 11 36.06 6.53
 -5 4 11 39.33 7.11
 5 4 -11 32.9 5.86
 -5 4 11 27.78 5.2
 5 4 -11 40.6 6.68
 -5 4 10 5.93 2.86
 5 4 -10 1.84 2.11
 -5 4 10 2.01 2.49
 -5 4 10 3.43 2.36
 5 4 -10 0.57 1.89
 -5 4 10 2.91 2.33
 5 4 -10 6.94 3.22
 -5 4 9 16.08 4.02
 -5 4 9 20.35 4.66
 5 4 -9 7.82 2.95
 -5 4 9 14.78 3.87
 5 4 -9 12.54 3.3
 -5 4 9 13.89 3.7
 5 4 -9 9.46 3.95
 -5 4 8 33.66 5.36
 -5 4 8 48.19 6.37
 -5 4 8 45.39 5.97
 5 4 -8 43.98 5.99
 5 4 -8 45.06 5.94
 -5 4 8 44.61 5.54
 5 4 -8 38.69 5.8
 -5 4 7 46.25 5.81
 -5 4 7 37.39 5.32
 -5 4 7 32.67 5.21
 5 4 -7 28.42 4.86
 5 4 -7 35.26 5.06
 -5 4 7 34.79 4.75
 5 4 -7 27.73 5.01
 -5 4 6 107.94 8.23
 -5 4 6 114.62 8.44
 5 4 -6 100.11 8.91
 -5 4 6 134.8 10.01
 -5 4 6 112.95 8.07
 5 4 -6 98.88 8.16
 5 4 -6 106.03 8.92
 -5 4 5 26.57 3.88
 -5 4 5 21.41 4.26
 5 4 -5 19.09 3.23
 5 4 -5 21.39 3.89
 5 4 -5 14.14 3.63
 -5 4 5 25.03 3.75
 -5 4 5 22.88 3.61
 5 4 -5 23.91 4.21
 -5 4 4 54.88 4.96
 -5 4 4 48.86 4.81
 -5 4 4 47.55 6.01
 5 4 -4 41.05 4.63
 5 4 -4 43.59 5.3
 -5 4 4 48.31 5.13
 5 4 -4 39.81 5.71
 -5 4 3 74.03 5.23
 -5 4 3 59.23 4.79
 -5 4 3 64.88 5.74
 5 4 -3 67.85 7.4
 5 4 -3 65.42 6.1
 -5 4 3 58.4 5.69
 5 4 -3 69.84 6.71
 -5 4 3 70.6 7.34
 -5 4 2 269.4 9.77
 -5 4 2 280.33 9.41
 -5 4 2 267.26 12.66
 -5 4 2 267.97 14.41
 5 4 -2 289.88 15.22
 -5 4 2 276.9 13.1
 5 4 -2 294.88 13.9
 5 4 -2 302.53 14.38
 -5 4 2 275.45 9.44
 -5 4 1 79.89 3.51
 -5 4 1 95.62 7.83
 5 4 -1 105.66 9.03
 -5 4 1 93.57 8.38
 5 4 -1 88.38 7.84
 -5 4 1 91.65 7.55
 5 4 -1 99.06 8.36
 5 4 -1 90.69 7.67
 -5 4 1 97.47 4.79
 5 4 0 194.38 12.81
 5 4 0 195.11 12.39
 -5 4 0 178.52 11.31
 -5 4 0 183.24 11.89
 -5 4 0 175.19 11.11
 5 4 0 163.52 11.17
 5 4 0 182.17 11.25
 -5 4 0 183.09 6.37
 5 4 0 203.8 12.37
 5 4 1 532.46 22.23
 5 4 1 538.05 21.35
 -5 4 -1 499.28 20.59
 -5 4 -1 526.16 20.92
 5 4 1 505.2 21.3
 -5 4 -1 493.5 20.28
 5 4 1 526.35 20.22
 5 4 2 5.37 3.48
 -5 4 -2 8.4 3.19
 5 4 2 3.51 2.84
 5 4 2 8.4 3.28
 -5 4 -2 14.66 4.21
 5 4 2 8.15 3.28
 -5 4 -2 1.71 2.38
 5 4 3 451.84 21.48
 5 4 3 453.63 19.64
 5 4 3 495.29 22.04
 -5 4 -3 473.93 20.16
 -5 4 -3 473.43 21.63
 5 4 3 526.93 23.35
 -5 4 -3 473.46 21.55
 5 4 3 504.07 20.57
 -5 4 -4 38.66 5.58
 5 4 4 32.94 5.88
 5 4 4 36.32 6.26
 5 4 4 31.77 5.22
 -5 4 -4 22.54 5.17
 5 4 4 39.58 5.93
 5 4 5 -0.74 2.3
 5 4 5 -2.29 2.77
 5 4 5 1.3 2
 -5 4 -5 -1.15 1.8
 -5 4 -5 -1.87 2.8
 5 4 5 2.56 2.47
 5 4 6 17.89 4.64
 5 4 6 16.9 4.96
 -5 4 -6 21.64 4.32
 -5 4 -6 29.22 6.16
 5 4 6 26.84 5.3
 5 4 7 23.27 5.87
 5 4 7 26.01 5.87
 -5 4 -7 21.42 5.65
 5 4 7 23.75 5.22
 5 4 8 7.07 4.07
 5 4 8 2.43 2.86
 5 4 8 -4.88 2.83
 -5 5 11 13.63 4.25
 -5 5 11 14.85 4.86
 5 5 -11 8 3.77
 5 5 -10 11.25 3.72
 -5 5 10 10.14 3.97
 -5 5 10 17.69 4.86
 5 5 -10 13.17 4.47
 5 5 -9 0.17 1.61
 -5 5 9 -0.08 2.36
 -5 5 9 1.87 1.94
 -5 5 9 -2.67 2.45
 5 5 -9 3.65 2.64
 5 5 -8 0.97 1.57
 -5 5 8 -4.26 2.65
 -5 5 8 -2.65 2.15
 -5 5 8 -4.28 2.77
 5 5 -8 3.48 2
 5 5 -8 0.62 2.39
 -5 5 7 66.32 7.36
 5 5 -7 54.75 7.16
 -5 5 7 52.76 6.58
 5 5 -7 62.9 6.66
 -5 5 7 54.22 7.3
 5 5 -7 57.43 7.21
 -5 5 6 78.61 7.44
 -5 5 6 57.98 6.62
 5 5 -6 59.71 7.45
 -5 5 6 59.53 7.5
 -5 5 6 52.3 5.5
 5 5 -6 60.02 6.4
 5 5 -6 61.41 7.24
 -5 5 5 15.06 3.27
 -5 5 5 12.13 3.08
 -5 5 5 18.94 4.69
 5 5 -5 15.08 4.16
 5 5 -5 12.96 3.13
 -5 5 5 13.59 2.94
 5 5 -5 18.45 4.31
 5 5 -4 75.4 8.34
 -5 5 4 68.76 6.18
 -5 5 4 62.17 5.95
 -5 5 4 70.61 5.9
 -5 5 4 75.43 8.55
 5 5 -4 61.26 5.85
 -5 5 4 80.43 6.71
 5 5 -4 82.61 7.49
 -5 5 3 105.14 6.83
 5 5 -3 94.71 9.43
 -5 5 3 87.99 6.67
 -5 5 3 107.23 7.8
 -5 5 3 113.34 10.18
 5 5 -3 94.6 7.6
 -5 5 3 104.86 7.84
 5 5 -3 90.05 8.05
 -5 5 2 50.42 5.77
 5 5 -2 57.52 7.38
 5 5 -2 47.88 5.78
 -5 5 2 52.48 7.08
 -5 5 2 57.73 6.03
 5 5 -2 64.61 6.89
 5 5 -1 129.45 10.93
 -5 5 1 119.67 10.53
 -5 5 1 128.99 9.58
 5 5 -1 132.43 9.95
 -5 5 1 136.66 9.69
 5 5 -1 136.89 10.26
 5 5 0 0.9 2.08
 -5 5 0 -0.09 2.53
 5 5 0 0.99 2.62
 5 5 0 -1.91 1.9
 -5 5 0 0.87 2.03
 -5 5 0 0.41 1.49
 5 5 1 65.75 8.33
 -5 5 -1 73.13 7.99
 5 5 1 59.48 7.61
 -5 5 -1 57.54 7.51
 5 5 1 74.71 8.22
 -5 5 -1 66.05 7.42
 5 5 2 24.24 5.15
 5 5 2 23.91 4.85
 -5 5 -2 28.55 5.24
 -5 5 -2 18.31 4.34
 -5 5 -2 23.97 4.86
 5 5 3 24.08 5.35
 5 5 3 19.24 4.61
 -5 5 -3 17.71 4.28
 -5 5 -3 16.5 4.84
 -5 5 -4 0.41 2.15
 5 5 4 -2.71 2.25
 5 5 4 1.8 2.56
 -5 5 -4 0.12 2.05
 5 5 5 21.66 4.86
 5 5 5 20.49 5.27
 5 5 5 16.76 5.04
 -5 5 -5 17.65 4.51
 -5 5 -5 11.52 4.21
 5 5 6 11.51 4.39
 5 5 6 10.87 4.53
 -5 5 -6 8.94 4.03
 5 5 7 4.48 3.08
 -5 6 10 1.45 2.37
 -5 6 10 3.62 3.16
 -5 6 9 39.84 6.72
 -5 6 9 34.86 6.51
 -5 6 9 24.89 5.68
 5 6 -9 32.74 6.52
 5 6 -9 16.58 5.09
 5 6 -8 26.13 6.03
 -5 6 8 31.84 5.79
 -5 6 8 23.76 5.28
 -5 6 8 27.79 5.73
 5 6 -8 42.92 7.06
 5 6 -7 65.88 8.71
 -5 6 7 59.32 7.47
 -5 6 7 52.12 7.06
 -5 6 7 59.27 8.4
 5 6 -7 61.66 8.2
 5 6 -6 47.21 7.37
 -5 6 6 36.52 5.7
 -5 6 6 36.69 5.57
 -5 6 6 40.81 6.93
 5 6 -6 49.52 7.01
 5 6 -5 23.06 5.56
 -5 6 5 18.6 3.97
 -5 6 5 28.37 5.76
 -5 6 4 6.28 3.16
 5 6 -4 9.05 3.73
 5 6 -3 9.7 3.76
 -5 6 3 5.67 3.39
 5 6 -3 1.69 1.63
 5 6 -2 21.93 5.2
 -5 6 2 24.48 5.55
 -5 6 2 21.31 3.97
 -5 6 1 19.24 4.82
 5 6 -1 17.07 4.87
 -5 6 1 13.58 3.6
 5 6 0 62.48 8.48
 -5 6 0 57.6 8.18
 -5 6 0 50.8 6.68
 5 6 1 29.38 5.95
 5 6 1 33.45 6.77
 -5 6 -1 34.99 6.36
 -5 6 -1 22.29 4.85
 5 6 2 2.43 2.73
 5 6 2 6.42 3.59
 -5 6 -2 6.36 3.15
 -5 6 -2 13.01 3.84
 5 6 3 3.97 2.83
 5 6 3 3.65 3.69
 -5 6 -3 2.99 3.13
 -5 6 -3 4.79 2.84
 5 6 4 69.25 8.92
 5 6 4 59.86 9.17
 -5 6 -4 52.98 8.24
 -5 6 -4 56.98 8.27
 -5 6 -5 -1.33 2.56
 -5 6 -5 1.76 2.65
 -5 7 9 -3.08 3.73
 -5 7 8 3.72 2.8
 -5 7 7 23.22 6.08
 5 7 -7 19.15 5.22
 -5 7 6 33.43 7.06
 5 7 -6 21.4 5.09
 5 7 -6 15.52 5.08
 5 7 -5 11.13 4.38
 -5 7 5 16.67 5.51
 5 7 -4 28.35 6.41
 -5 7 4 45.35 8.19
 5 7 -3 41.05 7.82
 -5 7 3 47 8.07
 5 7 -2 30.01 6.69
 -5 7 2 23.14 5.87
 5 7 -1 73.85 9.89
 -5 7 1 71.59 9.67
 5 7 0 14.65 5
 -5 7 0 11.12 4.48
 5 7 1 27.33 6.37
 5 7 1 30.81 6.8
 -5 7 -1 19.52 5.43
 -5 7 -1 14.75 4.06
 -5 7 -2 -0.93 2.47
 -5 7 -2 5.31 3.23
 -5 7 -3 9.72 4.16
 -5 7 -3 8.86 3.71
 -6 -7 6 8.52 4.14
 -6 -7 5 35.78 7.18
 6 -7 -4 18.9 5.92
 -6 -7 4 16.28 4.81
 6 -7 -3 15.5 5.69
 -6 -7 3 5.39 3.31
 6 -7 -2 15.8 5.35
 6 -7 1 34.5 6.43
 -6 -7 -1 52.96 7.87
 6 -7 2 -1.35 2.65
 -6 -7 -2 1.17 1.64
 -6 -7 -3 8.44 3.94
 -6 -7 -3 8.07 3.94
 6 -6 -10 -4.08 3.11
 6 -6 -9 4.31 3.49
 6 -6 -8 61.49 9.19
 -6 -6 8 44.95 8.2
 6 -6 -7 24.46 6.73
 -6 -6 7 27.92 6.22
 -6 -6 6 159.11 13.77
 6 -6 -6 152.3 13.97
 6 -6 -5 47.14 7.94
 -6 -6 5 40.43 7.03
 6 -6 -4 74.35 9.88
 -6 -6 4 79.82 9.25
 -6 -6 4 82.38 8.62
 -6 -6 3 36.51 5.96
 6 -6 -3 47.32 7.84
 -6 -6 3 47.86 6.83
 -6 -6 2 1.33 1.88
 -6 -6 2 1.69 1.86
 -6 -6 2 1.4 2.16
 -6 -6 1 56.6 7.58
 6 -6 -1 56.11 8.8
 -6 -6 1 53.2 7.45
 -6 -6 1 74.12 7.77
 -6 -6 1 41.86 6.09
 -6 -6 0 53.26 7.65
 6 -6 0 48.21 8.25
 -6 -6 0 61.82 8.21
 6 -6 0 60.8 7.42
 -6 -6 0 48.9 6.76
 -6 -6 -1 13.36 4.29
 6 -6 1 8.51 3.99
 -6 -6 -1 15.24 4.39
 6 -6 1 22.73 5.21
 -6 -6 -2 22.31 5.53
 6 -6 2 17.14 5.66
 -6 -6 -2 16.13 4.9
 6 -6 2 17.43 4.79
 -6 -6 -3 15.43 4.58
 6 -6 3 7.06 3.53
 -6 -6 -3 10.62 4.35
 6 -6 3 6.29 3.19
 -6 -6 -4 12.61 4.74
 6 -6 4 3.34 3.26
 -6 -5 12 12.06 4.59
 6 -5 -12 17.29 5.33
 -6 -5 11 30.57 6.11
 6 -5 -11 28.63 6.23
 6 -5 -11 31.47 6.31
 -6 -5 10 10.73 3.77
 -6 -5 10 1.68 2.7
 6 -5 -10 5.03 3.44
 6 -5 -10 7.03 3.37
 6 -5 -9 30.76 5.65
 -6 -5 9 33.9 5.7
 -6 -5 9 39.93 7.32
 -6 -5 9 30.14 5.17
 6 -5 -8 3.49 2.86
 -6 -5 8 2.78 2.21
 6 -5 -8 2.61 2.27
 -6 -5 8 -1.75 2
 -6 -5 8 8.32 3.65
 6 -5 -7 21.72 4.97
 -6 -5 7 21.46 4.39
 6 -5 -7 15.08 3.61
 -6 -5 7 23.41 4.29
 -6 -5 7 24.98 5.72
 6 -5 -6 51.82 7.52
 -6 -5 6 28.3 4.85
 6 -5 -6 41.92 5.43
 -6 -5 6 37.34 4.98
 -6 -5 6 40.16 6.5
 6 -5 -5 75.02 8.91
 -6 -5 5 65.1 6.2
 -6 -5 5 72.49 8.43
 -6 -5 5 70.09 7.62
 6 -5 -4 95.24 10.08
 -6 -5 4 101.7 9.23
 -6 -5 3 31.84 5.57
 6 -5 -3 31.6 6.19
 -6 -5 3 34.03 4.44
 -6 -5 2 28.33 5.13
 6 -5 -2 30.08 5.93
 -6 -5 2 45.5 5.29
 6 -5 -1 116.1 11.46
 -6 -5 1 106.72 9.92
 -6 -5 0 7.31 3.55
 6 -5 0 5.11 3.42
 -6 -5 0 9.62 3.4
 6 -5 0 2.3 2.14
 6 -5 1 89.83 9.12
 -6 -5 -1 78.18 9.36
 6 -5 1 101.53 10.85
 -6 -5 -1 107.11 10.56
 -6 -5 -2 -3.85 2.79
 6 -5 2 -1.76 2.91
 -6 -5 -2 4.45 2.73
 6 -5 2 0.23 3.05
 6 -5 3 20.77 5.11
 -6 -5 -3 18.06 5.27
 6 -5 3 12.89 3.89
 6 -5 4 3.56 2.91
 -6 -5 -4 0.5 3.01
 6 -5 4 1.33 2.22
 6 -5 5 8.85 3.72
 -6 -5 -5 9.63 4.27
 6 -5 5 3.3 3.03
 -6 -4 12 37.24 6.94
 -6 -4 12 28.46 6.73
 6 -4 -12 30.43 6.67
 6 -4 -12 44.48 6.99
 -6 -4 11 26.82 5.78
 -6 -4 11 18.41 5.77
 6 -4 -11 21.03 5.37
 6 -4 -11 23.71 5.12
 -6 -4 11 8.5 3.23
 -6 -4 10 30.49 5.83
 -6 -4 10 30.63 6.23
 6 -4 -10 26.86 5.66
 6 -4 -10 35.69 6.1
 -6 -4 10 26.93 5.16
 -6 -4 9 76.52 8.23
 6 -4 -9 92.63 9.43
 -6 -4 9 88.51 10.14
 6 -4 -9 76.49 8.37
 -6 -4 9 84.67 8.53
 -6 -4 8 14.96 3.69
 6 -4 -8 14.84 3.87
 -6 -4 8 17.34 3.7
 -6 -4 8 17.88 4.96
 6 -4 -8 12.42 3.72
 -6 -4 7 102.62 8.76
 6 -4 -7 97.04 8.77
 -6 -4 7 122.3 10.97
 6 -4 -7 105.6 9.59
 -6 -4 7 109.38 9.19
 -6 -4 6 51.72 5.93
 6 -4 -6 61.13 6.46
 6 -4 -6 64.78 7.48
 -6 -4 6 68.26 7.13
 6 -4 -5 34.12 5.67
 -6 -4 5 28.31 4.8
 6 -4 -5 28.99 4.39
 -6 -4 5 23.41 3.93
 -6 -4 4 123.56 8.19
 6 -4 -4 129.98 8.4
 -6 -4 4 113.47 6.46
 6 -4 -4 114.46 10.07
 -6 -4 4 130.11 10.07
 -6 -4 3 18.6 4.03
 6 -4 -3 15.2 3.92
 6 -4 -3 10.02 2.37
 -6 -4 3 21 3.33
 -6 -4 3 17.31 2.83
 -6 -4 2 78.6 6.09
 6 -4 -2 65.63 5.14
 6 -4 -2 85.03 8.76
 -6 -4 2 77.02 7.87
 -6 -4 1 46.44 6.32
 6 -4 -1 57.39 7.47
 -6 -4 1 43.29 4.63
 6 -4 -1 47.05 4.13
 -6 -4 0 284.36 12.23
 6 -4 0 302.1 15.19
 6 -4 0 265.2 16.15
 -6 -4 0 274.06 15.89
 -6 -4 -1 173.84 9.77
 6 -4 1 168.99 11.79
 -6 -4 -1 166.53 12.93
 6 -4 1 185.04 13.52
 -6 -4 -1 186.85 13.36
 -6 -4 -2 173.69 10.21
 6 -4 2 177.77 12.66
 -6 -4 -2 204.23 14.64
 6 -4 2 213.73 14.63
 6 -4 3 102.49 9.96
 -6 -4 -3 102.61 10.87
 6 -4 3 101.4 10.36
 6 -4 4 24.37 5.34
 -6 -4 -4 15.63 4.76
 6 -4 4 13.27 4.1
 6 -4 5 58.6 8.36
 -6 -4 -5 53.68 8.72
 6 -4 5 58.79 8.37
 6 -4 6 41.52 7.36
 -6 -4 -6 34.78 7.11
 6 -4 6 36.04 6.86
 -6 -3 13 -4.05 3.1
 -6 -3 13 2.86 3.28
 6 -3 -13 3.61 3.34
 -6 -3 12 19.46 4.9
 -6 -3 12 16.4 5.41
 6 -3 -12 17.07 5.17
 -6 -3 11 -2.39 2.57
 -6 -3 11 5.23 3.14
 6 -3 -11 2.99 2.99
 6 -3 -11 2.03 2.61
 -6 -3 11 -0.51 1.71
 -6 -3 10 50.01 6.99
 -6 -3 10 51.3 7.67
 6 -3 -10 33.33 6.3
 6 -3 -10 35.1 5.51
 -6 -3 10 43.13 6.38
 -6 -3 9 8.22 2.97
 6 -3 -9 1.15 1.88
 -6 -3 9 -2.74 2.33
 -6 -3 9 4.61 2.82
 6 -3 -9 3.61 2.24
 -6 -3 8 39.12 5.64
 6 -3 -8 35.59 5.68
 -6 -3 8 42.13 5.88
 -6 -3 8 46.46 6.56
 6 -3 -8 36.45 5.09
 6 -3 -7 60.29 6.75
 -6 -3 7 46.24 5.88
 6 -3 -7 51.08 5.92
 -6 -3 7 52.28 6.19
 6 -3 -6 33.02 4.81
 -6 -3 6 25.43 4.39
 6 -3 -6 20.46 3.93
 -6 -3 6 18.63 3.57
 -6 -3 5 165.58 9.95
 6 -3 -5 154.97 9.92
 6 -3 -5 160.01 10.43
 -6 -3 5 148.32 4.64
 -6 -3 5 155.65 10.66
 -6 -3 4 878.55 24.6
 6 -3 -4 861.73 24.51
 -6 -3 4 820.61 17.81
 6 -3 -4 856.35 26.61
 -6 -3 4 866.09 27.27
 -6 -3 3 85.27 6.72
 6 -3 -3 84.59 6.49
 6 -3 -3 76.95 7.47
 -6 -3 3 83.69 7.84
 -6 -3 2 740.85 21.45
 6 -3 -2 730.39 20.58
 6 -3 -2 720.31 24.59
 -6 -3 2 728.64 24.99
 -6 -3 1 387.45 14.68
 6 -3 -1 368.42 13.34
 6 -3 -1 362.55 17
 -6 -3 1 380.91 17.56
 -6 -3 0 184.67 9.94
 6 -3 0 157.08 8.35
 6 -3 0 152.55 10.97
 -6 -3 0 164.25 11.7
 -6 -3 -1 1032.73 27.88
 6 -3 1 978.72 24.89
 6 -3 1 974.93 29.92
 6 -3 1 1017.73 31.42
 -6 -3 -1 1050.76 32.76
 6 -3 2 52.85 6.88
 -6 -3 -2 54.98 7.56
 -6 -3 -2 49.63 5.73
 6 -3 2 48.4 6.43
 -6 -3 -3 68.24 8.62
 6 -3 3 62.47 6.56
 -6 -3 -3 73.25 7.21
 6 -3 3 85.77 8.61
 6 -3 4 37.86 6.31
 -6 -3 -4 24.73 5.77
 6 -3 4 26.65 4.43
 6 -3 4 24.99 5.16
 6 -3 5 39.22 6.57
 -6 -3 -5 33.62 6.42
 6 -3 5 32.91 4.96
 6 -3 5 40.42 6.69
 6 -3 6 35.16 6.54
 -6 -3 -6 20.27 5.82
 6 -3 6 35.41 6.55
 6 -3 7 12.08 4.43
 -6 -3 -7 6.52 4.54
 6 -3 7 14.28 4.56
 6 -3 9 1.86 1.89
 -6 -2 14 -0.74 2.52
 -6 -2 13 12.97 4.81
 -6 -2 13 7.56 3.63
 6 -2 -13 4.69 3
 -6 -2 12 31.7 6.26
 -6 -2 12 25.3 5.64
 6 -2 -12 29.33 6
 -6 -2 11 21.56 5.09
 -6 -2 11 18.41 4.78
 6 -2 -11 14 3.35
 6 -2 -11 15.65 4.62
 -6 -2 11 23.39 5.24
 6 -2 -10 17.49 4.56
 -6 -2 10 11.34 3.7
 6 -2 -10 18.51 3.66
 -6 -2 10 8.25 3
 -6 -2 9 206.34 13.4
 6 -2 -9 223.42 14.39
 6 -2 -9 227.99 11.54
 -6 -2 9 223.38 14.02
 -6 -2 9 199.57 13.11
 -6 -2 8 18.95 4.15
 6 -2 -8 15.18 3.94
 -6 -2 8 12.33 3.57
 6 -2 -8 13.44 3.02
 -6 -2 7 489.35 19.68
 6 -2 -7 564.97 21.54
 6 -2 -7 532.76 17.75
 -6 -2 7 556.5 20.95
 -6 -2 6 112.58 8.64
 6 -2 -6 133.68 9.52
 6 -2 -6 129.52 8.11
 -6 -2 6 128.13 9.46
 -6 -2 5 121.89 8.51
 6 -2 -5 117.91 8.62
 6 -2 -5 111.91 7.64
 -6 -2 5 110.31 8.72
 -6 -2 4 153.74 9.35
 6 -2 -4 159.42 9.6
 6 -2 -4 145.15 8.86
 -6 -2 4 156.8 4.68
 -6 -2 4 166.78 10.62
 -6 -2 3 53.67 5.37
 6 -2 -3 46.4 4.98
 6 -2 -3 51.96 5.48
 -6 -2 3 54.32 3.46
 -6 -2 3 53.81 5.99
 6 -2 -2 26.38 4.09
 -6 -2 2 22.65 2.71
 6 -2 -2 66.05 5.67
 -6 -2 2 27.47 3.83
 -6 -2 2 58.07 6.23
 -6 -2 1 130.97 8.36
 6 -2 -1 124.7 7.81
 6 -2 -1 135 8.94
 -6 -2 1 127.23 9.54
 -6 -2 0 25.67 4.46
 6 -2 0 30.26 4.43
 6 -2 0 27.37 3.73
 -6 -2 0 31.12 4.2
 -6 -2 -1 100.8 7.79
 6 -2 1 98.84 7.13
 6 -2 1 93.81 7.93
 -6 -2 -1 100.99 8.99
 -6 -2 -2 104.86 8.41
 6 -2 2 94.34 8.32
 6 -2 3 310.31 15.49
 -6 -2 -3 311.38 15.81
 6 -2 3 341.28 16.74
 -6 -2 -3 324.89 18
 6 -2 3 340.8 16.8
 6 -2 4 232.28 13.55
 -6 -2 -4 215.75 13.63
 6 -2 4 234.08 14.3
 -6 -2 -4 239.1 15.77
 6 -2 4 222.45 14.05
 6 -2 5 5.7 2.88
 -6 -2 -5 1.51 2.29
 6 -2 5 7.33 2.86
 6 -2 5 6.1 3.18
 -6 -2 -6 49.48 7.79
 6 -2 6 39.25 5.9
 6 -2 6 46.16 7.09
 6 -2 6 41.32 6.62
 -6 -2 -7 14.75 4.94
 6 -2 7 12.85 3.6
 -6 -2 -7 3.24 2.42
 6 -2 7 19.59 4.88
 -6 -2 -8 -7.85 4.2
 6 -2 8 -2.5 2.56
 6 -2 8 1.82 3.21
 6 -2 9 15.47 4.19
 -6 -1 15 -1.58 2.45
 -6 -1 14 23.47 6.24
 -6 -1 14 26.97 6.09
 6 -1 -14 39.07 7.77
 -6 -1 13 23.16 5.81
 -6 -1 13 16.73 4.67
 6 -1 -13 20.78 5.94
 -6 -1 12 77.13 9.26
 6 -1 -12 74.43 9.43
 -6 -1 12 61.39 7.95
 6 -1 -11 13.32 2.85
 6 -1 -11 16.4 4.63
 -6 -1 11 13.3 3.94
 -6 -1 11 7.03 3.22
 -6 -1 11 12.84 3.97
 6 -1 -10 0.83 2.38
 -6 -1 10 0.19 1.96
 -6 -1 10 5.39 2.55
 6 -1 -10 2.41 1.57
 -6 -1 10 -0.04 1.96
 6 -1 -9 3.53 2.78
 -6 -1 9 4.77 2.67
 6 -1 -9 1.22 1.21
 -6 -1 9 2.51 2.38
 -6 -1 8 96.66 8.6
 6 -1 -8 107.56 9.44
 6 -1 -8 101.57 6.21
 -6 -1 8 101.26 8.82
 -6 -1 7 138.02 9.78
 6 -1 -7 163.64 11
 6 -1 -7 143.99 7.24
 -6 -1 7 138.31 9.88
 -6 -1 6 5.36 2.33
 6 -1 -6 6.59 1.71
 6 -1 -6 5.91 2.36
 -6 -1 6 5.37 2.31
 6 -1 -5 150.72 9.9
 6 -1 -5 147.69 7.39
 -6 -1 5 132.37 9.31
 6 -1 -4 1429.58 34.42
 -6 -1 4 1398 33.4
 -6 -1 4 1319.69 23.11
 6 -1 -4 1395.3 29.3
 -6 -1 4 1456.63 35.31
 -6 -1 3 2.97 2.51
 -6 -1 3 4.43 1.11
 6 -1 -3 3.04 1.45
 6 -1 -3 5.54 2.3
 -6 -1 3 0.22 2.32
 -6 -1 2 1885.23 41.19
 6 -1 -2 1939.58 41.46
 -6 -1 2 1899 35.84
 6 -1 -2 1900.91 38.6
 -6 -1 2 1929.83 43.28
 -6 -1 1 307.98 13.4
 6 -1 -1 276.7 12.47
 6 -1 -1 287.89 11.9
 -6 -1 1 290.2 13.85
 -6 -1 0 73.11 6.63
 6 -1 0 57.42 5.66
 6 -1 0 68.6 5.97
 -6 -1 0 70.98 6.88
 -6 -1 -1 93.46 7.8
 6 -1 1 100.31 7.68
 6 -1 1 98.54 7.6
 -6 -1 -1 123.05 9.35
 6 -1 2 31.05 4.61
 6 -1 2 31.79 4.77
 6 -1 2 25.28 4.13
 -6 -1 -2 34.18 5.12
 6 -1 3 9.78 2.07
 6 -1 3 6.19 2.68
 -6 -1 -3 6.96 3.09
 6 -1 3 3.41 2.1
 -6 -1 -3 7.99 2.97
 6 -1 4 100.2 6.28
 6 -1 4 116.72 9.75
 -6 -1 -4 98.95 9.36
 -6 -1 -4 112.76 10.47
 6 -1 4 95.18 8.78
 -6 -1 -5 20.41 4.74
 6 -1 5 26.66 5.02
 6 -1 5 37.67 5.44
 -6 -1 -6 30.8 5.97
 6 -1 6 32.61 5.66
 -6 -1 -6 28.47 5.16
 6 -1 6 29.18 4.94
 -6 -1 -7 -0.39 2.87
 6 -1 7 4.62 2.93
 -6 -1 -7 -1.42 1.9
 6 -1 7 4.69 2.56
 -6 -1 -8 24.41 6.1
 -6 -1 -8 17.28 4.38
 6 -1 8 21.14 4.8
 -6 -1 -9 36.03 7.47
 6 -1 9 44.25 6.68
 6 0 -14 25.75 6.61
 -6 0 14 21.42 5.66
 6 0 -13 13.56 4.63
 -6 0 13 13.96 4.64
 -6 0 13 8.21 3.36
 6 0 -12 27.93 5.82
 -6 0 12 23.09 5.29
 -6 0 12 20.42 4.49
 6 0 -11 52.57 7.66
 -6 0 11 42.62 6.67
 6 0 -11 50.16 5.26
 -6 0 11 54.07 6.64
 6 0 -10 2.43 2.48
 -6 0 10 0.62 2.51
 6 0 -10 2.73 1.67
 -6 0 10 -0.37 2.43
 -6 0 10 1.63 2.49
 -6 0 9 703.8 25.18
 6 0 -9 682.11 25.73
 6 0 -9 645.17 15.76
 -6 0 9 674.47 24.76
 6 0 -9 716.29 21.34
 -6 0 8 58.24 6.88
 6 0 -8 67.08 7.52
 6 0 -8 66.58 3.17
 6 0 -8 68.83 3.79
 -6 0 8 65.69 7.05
 6 0 -8 73.17 6.29
 -6 0 7 516.83 19.74
 6 0 -7 521.05 20.61
 6 0 -7 541.59 12.67
 6 0 -7 474.87 11.34
 -6 0 7 514.86 19.68
 -6 0 6 241.39 12.59
 6 0 -6 257.14 13.66
 6 0 -6 277.1 9.11
 6 0 -6 253.48 7.11
 -6 0 6 242.92 12.7
 -6 0 5 11.66 2.95
 6 0 -5 9.26 1.29
 6 0 -5 13.46 3.24
 -6 0 5 12.84 2.96
 -6 0 4 35.56 4.62
 6 0 -4 40.33 4.92
 -6 0 4 29.98 4.15
 -6 0 4 31.64 2.63
 6 0 -4 34.54 2.67
 -6 0 3 131.75 8.5
 6 0 -3 131.42 8.77
 -6 0 3 123.56 6.17
 6 0 -3 139.17 6.07
 -6 0 3 139.7 9.02
 -6 0 2 47.24 5.12
 6 0 -2 42.09 4.89
 -6 0 2 27.13 3.16
 6 0 -2 33.93 3.27
 -6 0 2 54.06 5.53
 -6 0 1 18.02 3.36
 6 0 -1 8.43 1.91
 -6 0 1 14.6 2.19
 6 0 -1 15.21 3.11
 -6 0 1 13.02 2.94
 -6 0 0 158.52 7.13
 -6 0 0 168.2 10.29
 6 0 0 168.2 10.07
 6 0 0 160.85 8.64
 -6 0 0 149.79 9.64
 -6 0 -1 126.89 9.31
 6 0 1 138.47 9.52
 -6 0 -1 128.22 6.44
 6 0 1 142.52 8.78
 6 0 1 140.99 8.55
 -6 0 -1 148.51 9.83
 -6 0 -2 504.05 20.14
 6 0 2 469.12 15.62
 -6 0 -2 452.44 13.83
 6 0 2 478.57 19.76
 6 0 2 472.22 18.93
 6 0 2 458.66 17.26
 6 0 3 556.64 17.79
 6 0 3 550.46 16.44
 -6 0 -3 555.26 22.53
 6 0 3 537.66 22.09
 6 0 3 553.32 19.81
 6 0 3 593.16 18.71
 6 0 4 131.34 8.36
 6 0 4 148.79 11.47
 -6 0 -4 129.43 10.93
 6 0 4 147.63 8.25
 6 0 4 155.39 10.29
 -6 0 -4 136.03 10.92
 6 0 4 141.2 8.53
 6 0 5 133.3 9.01
 6 0 5 151.19 8.9
 6 0 5 156.05 12.2
 -6 0 -5 152.61 12.62
 6 0 5 150.2 10.52
 6 0 5 158.02 9.05
 -6 0 -5 144.21 11.62
 6 0 6 -1.61 1.64
 -6 0 -6 2.02 2.42
 6 0 6 -0.13 1.72
 -6 0 -6 3.66 2.37
 6 0 6 1.36 2.01
 -6 0 -7 4.17 2.95
 -6 0 -7 0.23 2.01
 6 0 7 8.17 2.97
 6 0 7 7.2 3.29
 -6 0 -8 -2.46 2.96
 -6 0 -8 -1.51 2.03
 6 0 8 1.79 1.99
 -6 0 -9 10.51 4.15
 -6 0 -9 11.17 4.01
 6 0 9 -0.64 2.25
 -6 0 -10 4.89 3.24
 6 1 -14 14.71 5.34
 -6 1 14 29.3 6.72
 6 1 -13 21.37 5.82
 -6 1 13 23.03 5.47
 6 1 -12 72.03 9.25
 -6 1 12 65.59 8.43
 -6 1 12 62.63 6.94
 6 1 -11 12.79 2.94
 6 1 -11 13.38 4.2
 -6 1 11 11.02 3.08
 -6 1 11 12.76 4.1
 6 1 -10 2.32 2.7
 -6 1 10 0.88 2.12
 6 1 -10 1.15 1.37
 -6 1 10 2.59 1.53
 -6 1 10 -0.37 2.21
 6 1 -9 -0.21 2.28
 -6 1 9 1.66 2.28
 6 1 -9 -2.66 1.98
 -6 1 9 4.2 2.42
 -6 1 8 113.59 9.19
 6 1 -8 98.04 9.08
 6 1 -8 102.87 7.7
 -6 1 8 90.87 8.27
 -6 1 7 134 9.66
 6 1 -7 156.15 6.08
 6 1 -7 149.43 9.27
 -6 1 7 155.16 10.17
 6 1 -7 144.37 10.61
 -6 1 6 7.56 2.4
 6 1 -6 6.86 2.49
 -6 1 6 11.38 2.99
 6 1 -6 4.26 1.34
 6 1 -6 12.72 3
 -6 1 5 141.15 9.3
 6 1 -5 165.64 10.63
 6 1 -5 153.34 7.12
 6 1 -5 166.52 9.5
 -6 1 5 156.68 9.52
 -6 1 4 1455.41 35.01
 6 1 -4 1502.73 36.47
 6 1 -4 1482.07 30.36
 -6 1 4 1369.99 29.71
 6 1 -4 1500.63 34.34
 -6 1 4 1431.49 33.95
 -6 1 3 3.44 1.99
 6 1 -3 5.17 2.01
 6 1 -3 0.52 2.17
 -6 1 3 4.59 2.12
 6 1 -3 6.72 1.87
 -6 1 2 1899.71 42.44
 6 1 -2 1969.79 43.35
 6 1 -2 1916.35 38.97
 6 1 -2 1909.76 41.11
 -6 1 2 1876.33 41.09
 -6 1 1 303.27 10.3
 -6 1 1 301.17 8.42
 -6 1 1 321.55 14.41
 6 1 -1 289.39 13.85
 6 1 -1 297.17 12.24
 6 1 -1 293.27 12.85
 -6 1 1 309.88 13.15
 -6 1 0 64.53 4.28
 -6 1 0 64.34 3.05
 -6 1 0 61.95 6.55
 6 1 0 62.43 6.41
 6 1 0 62.46 5.71
 6 1 0 55.55 5.45
 -6 1 0 63.5 5.91
 6 1 1 101.49 7.46
 -6 1 -1 103.79 5.37
 6 1 1 106.6 8.94
 -6 1 -1 95.11 8.3
 6 1 1 106.35 8.71
 6 1 1 95.81 7.27
 6 1 1 100.9 7.33
 -6 1 -1 114.48 8.14
 -6 1 -2 31.74 4.52
 -6 1 -2 30.95 2.98
 6 1 2 35.33 4.49
 6 1 2 35 4.42
 6 1 2 25.55 4.85
 6 1 2 27.81 4.67
 6 1 2 38.87 4.8
 -6 1 -2 32.07 5.23
 6 1 3 6.16 2.03
 6 1 3 8.11 2.49
 6 1 3 6.73 2.22
 6 1 3 4.64 3.1
 6 1 3 6.69 2.46
 -6 1 -3 5.16 2.73
 6 1 4 115.55 8.72
 6 1 4 111.51 8.11
 6 1 4 102.2 9.77
 -6 1 -4 118.16 10.81
 6 1 4 110.05 7.9
 6 1 4 108.3 8.7
 -6 1 -4 107.64 9.27
 6 1 5 25.2 4.34
 6 1 5 26.15 4.24
 -6 1 -5 21.61 4.68
 6 1 5 24.95 3.79
 -6 1 -5 32.36 5.66
 6 1 5 36.21 6.35
 6 1 5 23.83 4.42
 -6 1 -5 32.41 6.06
 -6 1 -6 20.15 4.63
 6 1 6 19.52 4.23
 6 1 6 20.05 3.98
 6 1 6 30.12 6
 -6 1 -6 24.32 5.02
 6 1 6 25.45 4.82
 6 1 7 7.86 2.9
 6 1 7 2.07 2.15
 6 1 7 4.23 2.91
 -6 1 -7 3.08 2.74
 -6 1 -7 2.62 2.46
 6 1 7 5.34 2.77
 6 1 8 21.78 4.72
 -6 1 -8 22.96 5.22
 -6 1 -8 16.92 4.96
 6 1 8 28.95 5.26
 -6 1 -9 29.64 6.04
 -6 1 -9 26.82 6.32
 6 1 9 35.08 6.01
 6 1 10 1.05 2.13
 6 2 -14 3.24 3.45
 -6 2 14 4.5 3.42
 6 2 -14 0.32 1.62
 6 2 -13 10.89 4.52
 -6 2 13 6.99 3.34
 6 2 -13 8.26 3.18
 6 2 -12 27.69 5.95
 -6 2 12 27.73 5.55
 6 2 -12 35.62 5.99
 6 2 -11 13.92 4.26
 -6 2 11 25.16 5.13
 6 2 -11 22.81 4.12
 6 2 -11 28.93 5.1
 6 2 -10 18.97 4.8
 -6 2 10 7.73 3.16
 6 2 -10 14.71 3.73
 -6 2 10 16.29 3.17
 6 2 -10 12.86 3.18
 -6 2 9 207.39 13.09
 6 2 -9 199.48 13.42
 6 2 -9 209.19 11.91
 6 2 -8 11.09 3.09
 6 2 -8 13.42 3.7
 -6 2 8 16.67 3.99
 -6 2 8 19.38 4.16
 -6 2 7 488.58 19.36
 6 2 -7 522.22 20.92
 6 2 -7 496.51 18.94
 -6 2 7 547.19 19.91
 -6 2 6 115.9 8.75
 6 2 -6 117.38 9.25
 6 2 -6 114.46 8.63
 6 2 -6 129.26 6.65
 -6 2 6 121.32 8.58
 -6 2 5 108 8.25
 6 2 -5 129.25 9.37
 6 2 -5 125.06 8.93
 6 2 -5 108.57 6.43
 -6 2 5 125.59 8.33
 -6 2 4 171.23 10.22
 6 2 -4 167.37 10.61
 6 2 -4 178.92 8.72
 6 2 -4 171.26 10.46
 -6 2 4 163.25 9.2
 -6 2 3 49.06 5.49
 6 2 -3 42.47 5.28
 6 2 -3 55.67 5.02
 6 2 -3 35.52 4.82
 -6 2 3 54.57 5.05
 -6 2 2 25.52 3.52
 6 2 -2 26.37 4.3
 -6 2 2 24.89 4.1
 6 2 -2 26.98 3.8
 6 2 -2 22.68 4.03
 -6 2 1 123.82 5.16
 -6 2 1 121.73 9.01
 6 2 -1 125.6 9.23
 6 2 -1 131.4 8.98
 6 2 -1 125.88 8.14
 -6 2 1 131.88 7.94
 -6 2 0 28.8 3.71
 -6 2 0 29.83 1.93
 6 2 0 27.73 4.65
 6 2 0 28.31 4.77
 6 2 0 27.52 4.16
 6 2 0 23.91 3.84
 -6 2 0 31.99 4.85
 6 2 1 108.56 8.52
 6 2 1 103.11 9.16
 -6 2 -1 92.08 8.53
 6 2 1 97.99 8.78
 6 2 1 96.52 7.73
 6 2 1 107.27 7.96
 -6 2 -1 104.4 7.27
 6 2 2 103.75 8.53
 6 2 2 108.79 9.92
 -6 2 -2 94.68 9.06
 6 2 2 114.27 8.51
 6 2 2 122.75 8.88
 -6 2 -2 108.08 7.77
 6 2 3 326.91 15.82
 6 2 3 295.71 14.59
 -6 2 -3 334.79 17.31
 6 2 3 334.71 18.03
 6 2 3 289.68 14.01
 -6 2 -3 304.72 17.17
 6 2 3 325.74 15.39
 -6 2 -3 330.82 15.12
 -6 2 -3 326.56 14.48
 6 2 4 233.68 13.69
 6 2 4 226.89 13.05
 -6 2 -4 246.7 15.34
 6 2 4 240.16 15.88
 6 2 4 238.53 12.55
 -6 2 -4 270.17 16.71
 6 2 4 245.11 13.69
 -6 2 -4 237.13 13.03
 6 2 5 4.14 2.55
 6 2 5 3.49 2.31
 -6 2 -5 1.94 1.79
 6 2 5 10.13 3.79
 -6 2 -5 4.07 2.76
 6 2 5 2.2 2.33
 6 2 5 6.67 2.53
 6 2 6 43.5 6.38
 6 2 6 51.22 6.75
 -6 2 -6 36.52 5.62
 6 2 6 43.66 7.3
 -6 2 -6 42.21 7.09
 6 2 6 62.43 7.46
 6 2 7 10.87 3.58
 6 2 7 18.52 4.61
 -6 2 -7 19.97 4.46
 -6 2 -7 15.72 4.85
 6 2 7 17.44 4.42
 6 2 8 5.93 3.46
 6 2 8 1.19 2.17
 -6 2 -8 -1.07 2.23
 6 2 8 1.44 2.67
 6 2 9 10.57 4.25
 6 2 9 10.71 3.68
 6 3 -14 2.81 3.24
 -6 3 14 -1.44 2.64
 -6 3 13 2.31 2.24
 -6 3 13 2.08 2.69
 6 3 -13 4.41 2.83
 -6 3 13 1.8 2.36
 6 3 -13 2.89 2.67
 -6 3 12 17.44 4.81
 -6 3 12 23.09 5.6
 6 3 -12 21.13 5.37
 -6 3 12 26.03 5.75
 6 3 -12 24.93 5.41
 -6 3 11 -0.2 2.39
 6 3 -11 0.59 2.35
 -6 3 11 1.13 2.12
 -6 3 11 0.61 2.21
 6 3 -11 0.17 2.26
 -6 3 10 50.98 6.83
 -6 3 10 33.68 5.95
 6 3 -10 34.39 6.08
 -6 3 10 41.84 6.2
 6 3 -10 30.51 5.02
 -6 3 10 37.77 5.31
 6 3 -10 45.74 6.69
 6 3 -9 2.44 2.56
 -6 3 9 2.28 2.08
 -6 3 9 4.52 2.22
 -6 3 9 3.23 2.05
 6 3 -9 4.49 2.48
 6 3 -9 5.74 2.55
 -6 3 8 37.04 5.2
 6 3 -8 32.04 5.42
 -6 3 8 39.46 5.51
 -6 3 8 33.02 4.99
 6 3 -8 34.03 5.22
 6 3 -8 27.8 4.81
 -6 3 7 53.65 5.84
 6 3 -7 60.09 6.7
 -6 3 7 50.96 5.94
 6 3 -7 44.73 5.98
 -6 3 7 46.47 5.68
 -6 3 6 30.36 4.06
 6 3 -6 21.74 4.38
 -6 3 6 27.22 4.42
 -6 3 6 25.47 3.93
 6 3 -6 25.28 4.38
 -6 3 5 178.95 9.18
 -6 3 5 167.75 10.41
 6 3 -5 186.71 11.75
 6 3 -5 173.99 11.29
 6 3 -5 181.46 9.3
 -6 3 5 178.96 9.82
 -6 3 4 874.97 21.45
 -6 3 4 852.72 25.83
 6 3 -4 866.89 27.51
 6 3 -4 883.55 27.27
 6 3 -4 859.88 23.6
 -6 3 4 892.59 23.62
 -6 3 3 78.75 4.72
 -6 3 3 84.34 5.17
 -6 3 3 79.75 7.22
 6 3 -3 80.09 7.75
 6 3 -3 89.53 7.98
 6 3 -3 91.39 7
 -6 3 3 68.38 5.54
 -6 3 2 739.2 15.98
 -6 3 2 699.37 14.39
 6 3 -2 721.99 24.21
 6 3 -2 730.22 24.69
 -6 3 2 723.44 23.73
 6 3 -2 731.38 24.67
 6 3 -2 735.2 22.31
 -6 3 2 715.14 19.49
 6 3 -1 341.12 16.45
 6 3 -1 378.28 17.11
 -6 3 1 348.98 16.13
 6 3 -1 357.92 16.91
 6 3 -1 376.19 15.6
 -6 3 1 378.99 13.02
 6 3 0 172.07 11.77
 6 3 0 180.54 12.2
 6 3 0 172.98 11.37
 -6 3 0 183.96 11.91
 6 3 0 162.54 11.6
 6 3 0 181.51 10.95
 -6 3 0 179.53 8.77
 6 3 1 971.25 30.77
 6 3 1 938.67 31.2
 6 3 1 955.29 29.28
 -6 3 -1 995.28 31.28
 6 3 1 991.63 31.42
 6 3 1 957.2 28.65
 -6 3 -1 1005.29 24.62
 6 3 2 57.03 7
 -6 3 -2 70.77 8.08
 6 3 2 56.43 6.69
 6 3 2 61.46 7.77
 6 3 2 56.94 6.58
 -6 3 -2 48.39 6.91
 -6 3 -2 62.48 5.45
 6 3 3 102.4 9.52
 -6 3 -3 77.98 8.76
 -6 3 -3 87.25 8.08
 6 3 3 90.04 8.14
 6 3 3 95.96 10.01
 -6 3 -3 79.01 8.96
 6 3 3 80.98 7.98
 -6 3 -3 79.6 6.84
 -6 3 -3 93.01 6.9
 -6 3 -4 27.48 4.03
 6 3 4 22.8 4.83
 6 3 4 27.09 5.02
 -6 3 -4 23.67 4.38
 -6 3 -4 29.92 4.32
 6 3 4 34.89 6.35
 -6 3 -4 36.31 6.45
 6 3 4 25.96 4.78
 6 3 4 35.13 5.63
 -6 3 -4 28.34 5.81
 6 3 5 35.83 6.15
 6 3 5 27.57 5.38
 -6 3 -5 37.78 5.27
 6 3 5 44.07 7.56
 -6 3 -5 32.15 6.26
 6 3 5 33.22 5.02
 6 3 5 27.83 5.3
 6 3 6 36.46 6.45
 6 3 6 22.04 4.99
 -6 3 -6 27.73 6.04
 6 3 6 25.49 5.06
 6 3 7 10.72 4.05
 6 3 7 10.65 3.97
 -6 3 -7 15.63 4.93
 6 3 7 18.34 4.53
 6 3 8 5.71 3.66
 6 3 8 14.89 4.59
 6 3 8 16.17 4.46
 6 3 9 9.69 4.01
 -6 4 12 25.23 5.9
 -6 4 12 27.31 5.95
 6 4 -12 39.92 6.9
 6 4 -12 31.82 6.28
 -6 4 11 11.37 4.24
 6 4 -11 18.73 4.87
 -6 4 11 12.94 3.99
 -6 4 11 11.91 3.81
 6 4 -11 14.9 4.28
 -6 4 10 29.93 5.53
 -6 4 10 30.74 5.88
 6 4 -10 18.39 4.45
 6 4 -10 31.23 5.71
 -6 4 10 25.64 4.93
 -6 4 10 36.74 5.83
 6 4 -10 41.26 6.54
 -6 4 9 81.24 8.55
 -6 4 9 85.73 8.78
 6 4 -9 82.63 8.59
 -6 4 9 100.2 9.23
 -6 4 9 101.3 9.02
 6 4 -9 78.25 8.47
 6 4 -9 83.24 8.86
 -6 4 8 15.42 3.92
 -6 4 8 11.13 3.37
 -6 4 8 8 2.99
 6 4 -8 7.09 2.84
 6 4 -8 16.78 4.06
 -6 4 8 15.63 3.7
 6 4 -8 9.1 3.44
 -6 4 7 127.34 9.33
 -6 4 7 115.61 8.98
 6 4 -7 104.26 9.7
 -6 4 7 123.56 10.16
 -6 4 7 124.12 9.35
 6 4 -7 105.7 9.2
 -6 4 6 59.21 6
 -6 4 6 50.34 5.56
 -6 4 6 60.86 7.07
 6 4 -6 61.42 7.47
 6 4 -6 58.4 6.78
 -6 4 6 55.17 6.12
 -6 4 5 27.66 3.87
 -6 4 5 23.98 3.58
 -6 4 5 21.61 4.53
 6 4 -5 21.24 4.07
 -6 4 5 29.96 4.47
 6 4 -5 29.04 5.12
 -6 4 4 121.06 7.36
 -6 4 4 128.1 7.46
 -6 4 4 121.78 9.98
 6 4 -4 127.06 10.46
 6 4 -4 119.77 8.94
 -6 4 4 124.76 9.08
 6 4 -4 124.11 9.62
 -6 4 4 133.55 7.77
 -6 4 3 21.77 2.73
 -6 4 3 15.12 2.33
 -6 4 3 14.73 3.89
 6 4 -3 20.53 3.95
 6 4 -3 15.71 3.62
 6 4 -3 12.56 3.07
 -6 4 3 23 4.02
 6 4 -3 15.4 3.91
 -6 4 3 22.2 3.06
 -6 4 2 74.03 7.83
 6 4 -2 75.08 8.01
 6 4 -2 67.03 7.01
 -6 4 2 73.92 7.25
 6 4 -2 66.73 7.3
 6 4 -2 73.81 7.14
 -6 4 2 63.96 4.67
 -6 4 1 56.66 6.88
 6 4 -1 37.79 5.62
 -6 4 1 49.52 6.15
 -6 4 1 51.09 6.19
 6 4 -1 46.6 6.33
 6 4 -1 43.68 5.72
 6 4 -1 49.46 6.56
 -6 4 1 57.07 4.19
 6 4 0 265.15 15.97
 -6 4 0 289.85 15.48
 -6 4 0 276.76 15.37
 6 4 0 288.36 15.91
 6 4 0 297.73 16.31
 -6 4 0 277.44 15.31
 6 4 0 279.52 15.77
 6 4 0 292.15 14.93
 6 4 1 187.69 13.53
 -6 4 -1 170 12.36
 -6 4 -1 191.56 12.73
 6 4 1 179.7 12.5
 6 4 1 163.56 12.49
 -6 4 -1 173.06 12.51
 6 4 1 171.88 11.78
 6 4 2 184.89 13.65
 6 4 2 154.28 11.62
 -6 4 -2 195.97 13.78
 -6 4 -2 185.89 12.57
 6 4 2 192.71 14.07
 -6 4 -2 176.82 13.16
 6 4 2 188.41 12.5
 6 4 3 86.54 9.46
 6 4 3 94.36 9.05
 -6 4 -3 88.66 8.82
 -6 4 -3 82.2 9.33
 6 4 3 97.4 10.36
 -6 4 -3 90.66 9.78
 6 4 3 98.1 9.26
 6 4 4 23.32 5.21
 -6 4 -4 16.16 3.99
 6 4 4 24.36 4.74
 6 4 4 26.62 6.03
 -6 4 -4 30.33 6.2
 6 4 4 22.49 4.94
 6 4 5 62.07 8.66
 6 4 5 66.6 8.64
 -6 4 -5 59.37 7.29
 6 4 5 57.65 7.03
 -6 4 -5 59.91 8.87
 6 4 5 51.87 7.14
 6 4 6 29.26 6.48
 6 4 6 36.33 6.67
 -6 4 -6 29.04 6.36
 6 4 6 28.9 5.84
 6 4 7 12.74 4.28
 6 4 7 14 4.99
 6 4 7 8.63 3.71
 -6 5 11 34.33 6.41
 -6 5 11 36.24 6.75
 6 5 -10 3.25 2.97
 -6 5 10 5.09 2.96
 -6 5 10 7.19 3.64
 -6 5 10 7.66 3.28
 6 5 -10 2.59 2.7
 -6 5 9 40.39 6.41
 6 5 -9 32.65 5.99
 -6 5 9 40.15 6.44
 -6 5 9 45 6.8
 6 5 -9 36 5.7
 6 5 -9 41.62 6.76
 -6 5 8 7.97 2.97
 -6 5 8 6.46 2.63
 -6 5 8 3.46 3.09
 6 5 -8 1.67 2.06
 6 5 -8 5 2.51
 6 5 -8 5.14 3.29
 -6 5 7 19.94 4.09
 -6 5 7 16.21 3.8
 -6 5 7 17.96 4.45
 6 5 -7 15.51 4.38
 6 5 -7 21.26 4.52
 -6 5 6 37.52 5.24
 -6 5 6 46.08 5.6
 -6 5 6 39.24 6.5
 6 5 -6 42.88 6.78
 6 5 -6 36.82 5.54
 -6 5 6 36.51 5.06
 -6 5 5 71.54 6.49
 -6 5 5 74.47 6.74
 -6 5 5 82.42 7.46
 6 5 -5 81.79 8.08
 -6 5 5 64.36 8.07
 6 5 -4 97.7 9.93
 -6 5 4 98.79 7.72
 -6 5 4 105.08 10.17
 6 5 -4 97.38 8.17
 -6 5 4 108.85 8.67
 6 5 -4 99.39 8.88
 6 5 -3 39.54 5.56
 6 5 -3 18.97 4.75
 -6 5 3 30.86 4.61
 -6 5 3 37.76 6.12
 6 5 -3 33.07 5.28
 -6 5 3 32.34 4.87
 -6 5 2 35.72 6.09
 6 5 -2 35.49 5.4
 6 5 -2 48.38 7.06
 -6 5 2 33.2 5.05
 6 5 -2 31.37 5.41
 -6 5 2 37.44 5.41
 6 5 -1 96.49 9.86
 -6 5 1 93.3 8.75
 -6 5 1 120.59 10.85
 6 5 -1 101.05 9.39
 -6 5 1 110.51 9.45
 6 5 -1 105.68 9.66
 -6 5 0 7.45 3.37
 6 5 0 4.69 2.76
 6 5 0 5.82 3.11
 -6 5 0 11.17 3.57
 -6 5 0 2.8 2.24
 6 5 1 90 10.05
 6 5 1 81.48 9.19
 -6 5 -1 98.71 10
 -6 5 -1 90.15 9.36
 6 5 1 95.09 9.85
 -6 5 -1 99.75 9.71
 6 5 1 85.66 8.9
 6 5 2 7.61 3.61
 -6 5 -2 2.3 2.12
 6 5 2 3.06 2.83
 6 5 2 -2.76 2.69
 -6 5 -2 -1.29 2.3
 6 5 2 -0.29 2.39
 -6 5 -2 -1.18 2.14
 6 5 3 18.79 5.18
 6 5 3 17.05 4.53
 -6 5 -3 14.03 4.11
 -6 5 -3 17.29 5
 6 5 3 22.64 5.14
 6 5 4 4.23 3.34
 6 5 4 3.8 2.86
 -6 5 -4 1 1.92
 -6 5 -4 3.18 3.27
 6 5 4 4.61 3.1
 6 5 5 6.41 3.02
 6 5 5 6.62 3.66
 -6 5 -5 3.76 2.39
 -6 5 -5 2.19 3.2
 6 5 5 5.92 3.32
 6 5 6 18.83 5.57
 6 6 -10 -0.48 2.29
 -6 6 10 -4.6 2.9
 -6 6 10 1.82 3.27
 6 6 -9 2.83 3.39
 -6 6 9 4.43 2.7
 -6 6 9 4.82 3.42
 -6 6 9 3.28 2.96
 6 6 -8 37.73 7.06
 -6 6 8 61.45 7.76
 -6 6 8 55.61 8.32
 6 6 -8 59.53 8.37
 6 6 -7 30.11 6.52
 -6 6 7 28.89 6.28
 6 6 -6 144.05 13.13
 -6 6 6 173.2 14.26
 6 6 -5 45.95 7.67
 -6 6 5 43.93 7.34
 6 6 -4 87.7 10.08
 -6 6 4 104.15 11.13
 6 6 -4 86.46 8.64
 6 6 -3 48.5 7.63
 -6 6 3 45.32 7.3
 6 6 -3 47.35 6.56
 6 6 -2 2.89 2.78
 -6 6 2 2.99 2.39
 -6 6 2 1.62 1.98
 6 6 -2 3.58 2.51
 6 6 -1 52.39 7.91
 -6 6 1 52.8 7.94
 6 6 -1 63.88 7.7
 -6 6 1 65.01 7.72
 6 6 0 59.83 8.45
 -6 6 0 63.42 8.68
 -6 6 0 53.88 7.22
 6 6 1 19.85 5.24
 6 6 1 16.98 5.01
 -6 6 -1 16.2 4.91
 -6 6 -1 11.15 4
 -6 6 -1 13.34 3.83
 6 6 2 20.55 5.38
 6 6 2 15.93 5.16
 -6 6 -2 21.03 5.36
 -6 6 -2 16.11 4.84
 6 6 3 -1.33 3.13
 6 6 3 11.77 4.64
 -6 6 -3 6.69 3.28
 -6 6 -3 4.97 3.55
 6 6 4 5.63 3.55
 -6 6 -4 5.01 2.95
 -6 6 -4 4.46 3.54
 -6 6 -5 3.78 2.55
 -6 7 3 11.34 4.18
 -6 7 -1 41.15 7.23
 -6 7 -2 -2.25 2.34
 -7 -7 5 19.58 5.53
 -7 -7 4 21.22 5.43
 7 -6 -9 16.53 5.3
 7 -6 -8 2.31 2.77
 -7 -6 8 6.06 3.66
 7 -6 -7 10.11 3.99
 -7 -6 7 8.66 3.57
 7 -6 -6 69.08 9.99
 -7 -6 6 65.87 9.24
 -7 -6 5 32.8 5.91
 7 -6 -5 40.67 7.53
 -7 -6 5 24.14 5.81
 -7 -6 4 104.14 10.79
 7 -6 -4 107.91 12.22
 -7 -6 4 96.19 10.01
 -7 -6 3 29.74 6.1
 7 -6 -3 32.01 7.26
 -7 -6 3 31.3 5.92
 -7 -6 2 19.71 5.09
 7 -6 -2 32.27 7
 -7 -6 1 15.66 4.61
 7 -6 -1 13.36 5.23
 -7 -6 1 18.97 4.97
 -7 -6 0 9.43 3.8
 7 -6 0 3.32 4.01
 -7 -6 0 4.07 2.95
 -7 -6 -1 35.06 6.91
 7 -6 1 38.35 7.75
 -7 -6 -1 42.65 7.71
 -7 -6 -2 31.06 6.78
 -7 -6 -2 36.55 7.26
 7 -6 2 36.68 6.81
 -7 -6 -3 24.98 6.18
 -7 -6 -3 21.65 6.04
 7 -5 -12 13.43 4.67
 -7 -5 12 13.44 4.53
 7 -5 -11 15.66 5.11
 7 -5 -11 9.75 3.83
 -7 -5 11 10.43 3.97
 7 -5 -10 55.68 8.14
 7 -5 -10 32.81 6.35
 -7 -5 10 37.66 6.51
 -7 -5 10 58.84 9.43
 -7 -5 10 44.72 6.93
 -7 -5 9 44.31 6.62
 7 -5 -9 52.45 7.77
 7 -5 -9 35.06 6.28
 -7 -5 9 40.64 6.44
 -7 -5 9 49.17 8.44
 -7 -5 8 17.98 4.36
 7 -5 -8 16.27 4.83
 7 -5 -8 19.45 4.33
 -7 -5 8 16.25 3.97
 -7 -5 8 20.41 5.49
 -7 -5 7 22 4.67
 7 -5 -7 32.18 6.34
 -7 -5 7 29.88 4.91
 -7 -5 7 26.41 6.21
 -7 -5 6 29.52 5.46
 7 -5 -6 25.42 5.8
 -7 -5 6 26.42 5.77
 -7 -5 5 50.03 6.92
 7 -5 -5 38.18 6.77
 -7 -5 4 16.61 4.37
 7 -5 -4 16.85 4.86
 7 -5 -3 87.5 10.12
 -7 -5 3 72.48 8.51
 -7 -5 2 44.12 6.86
 7 -5 -2 63.54 8.79
 -7 -5 1 19.17 4.96
 7 -5 -1 26.11 6.25
 -7 -5 0 53.46 7.87
 7 -5 0 61.44 8.85
 -7 -5 0 33.31 6.6
 -7 -5 -1 33.36 6.62
 7 -5 1 54.37 8.5
 -7 -5 -1 48.99 7.85
 -7 -5 -2 3.83 2.88
 7 -5 2 4.22 2.86
 -7 -5 -2 7.27 3.61
 7 -5 2 4.82 3.52
 -7 -5 -3 19.42 5.43
 7 -5 3 10.87 4.5
 -7 -5 -3 21.14 5.71
 7 -5 3 16.23 5.01
 7 -5 4 16.62 5.31
 -7 -5 -4 10.99 4.36
 7 -5 4 7.11 3.56
 7 -4 -12 -2.88 3.05
 -7 -4 12 2.13 2.72
 -7 -4 12 1.8 2.55
 7 -4 -11 3.49 2.72
 -7 -4 11 5.99 3.68
 -7 -4 11 4.55 3.41
 -7 -4 11 1.85 2.46
 7 -4 -11 0.23 1.75
 7 -4 -10 42.93 6.7
 7 -4 -10 40.17 6.74
 -7 -4 10 33.9 6.03
 -7 -4 10 51.24 8.36
 -7 -4 10 40.18 6.54
 -7 -4 9 44.94 6.68
 7 -4 -9 29.72 5.65
 7 -4 -9 36.89 6.13
 -7 -4 9 32.13 5.77
 -7 -4 9 33.43 6.82
 -7 -4 8 22.43 4.72
 7 -4 -8 20.78 4.52
 7 -4 -8 18.84 4.4
 -7 -4 8 18.29 4.14
 -7 -4 8 21.9 5.36
 -7 -4 7 32.61 5.4
 7 -4 -7 32.75 5.62
 7 -4 -7 31.65 5.34
 -7 -4 7 36.17 5.43
 -7 -4 6 65.16 6.98
 7 -4 -6 63.34 6.94
 7 -4 -6 73.86 8.19
 -7 -4 6 73.27 8.08
 -7 -4 5 27.58 5.13
 7 -4 -5 39.04 6.18
 7 -4 -5 25.89 4.32
 -7 -4 5 44.12 5.48
 -7 -4 4 173.97 10.56
 7 -4 -4 158.97 9.88
 7 -4 -4 157.24 12.18
 -7 -4 4 156.04 11.95
 -7 -4 3 18.96 4.13
 7 -4 -3 16.3 4.48
 7 -4 -3 19.33 3.21
 -7 -4 3 16.37 3.29
 -7 -4 2 29.34 5.44
 7 -4 -2 19.99 4.65
 7 -4 -2 19.47 3.14
 -7 -4 2 20.42 3.61
 -7 -4 1 67.72 6.35
 7 -4 -1 77.49 8.88
 -7 -4 1 71.41 8.47
 -7 -4 0 58.66 8.01
 7 -4 0 60.31 8.02
 -7 -4 0 57.41 6.02
 -7 -4 -1 68.19 8.78
 7 -4 1 54.88 7.64
 -7 -4 -1 63.39 8.74
 7 -4 2 82.24 9.05
 -7 -4 -2 74.33 9.56
 7 -4 2 96.82 10.29
 -7 -4 -2 91.37 10.43
 7 -4 3 78.37 9.61
 7 -4 3 79.67 9.35
 -7 -4 -3 93.11 11.1
 7 -4 4 31.33 6.36
 -7 -4 -4 26.71 6.46
 7 -4 4 30.42 6.08
 7 -4 5 21.83 5.7
 -7 -4 -5 29.47 6.87
 7 -4 5 21.87 5.76
 7 -3 -13 6.62 3.65
 -7 -3 13 9.89 4.19
 -7 -3 13 -1.4 2.92
 7 -3 -12 38.48 7.26
 -7 -3 12 36.77 6.93
 -7 -3 12 47.35 8.05
 -7 -3 12 36.46 6.86
 7 -3 -11 31.01 6.14
 -7 -3 11 24.03 5.37
 -7 -3 11 29.2 6.49
 -7 -3 11 23.8 5.34
 7 -3 -10 6.46 3.41
 -7 -3 10 8.23 3.58
 -7 -3 10 11.18 4.29
 7 -3 -10 12.18 3.51
 -7 -3 10 2 2.51
 7 -3 -9 30.51 4.83
 -7 -3 9 39.78 6.14
 7 -3 -9 42.31 6.53
 -7 -3 9 43.54 6.39
 -7 -3 9 40.93 6.72
 -7 -3 8 8.39 3.22
 7 -3 -8 4.88 2.45
 7 -3 -8 7.32 3.44
 -7 -3 8 11.1 3.19
 -7 -3 7 23.89 4.64
 7 -3 -7 21.95 4.26
 7 -3 -7 14.13 3.67
 -7 -3 7 20.57 4.15
 -7 -3 6 24.46 4.73
 7 -3 -6 16.66 3.9
 7 -3 -6 21.03 4.18
 -7 -3 6 18.37 3.82
 -7 -3 5 77.47 7.21
 7 -3 -5 65.99 6.83
 7 -3 -5 73.52 7.45
 -7 -3 5 82.25 8.36
 -7 -3 4 24.34 4.88
 7 -3 -4 37.42 5.46
 7 -3 -4 21.84 3.82
 -7 -3 4 30.71 4.49
 -7 -3 4 25.36 2.48
 -7 -3 3 36.61 5.66
 7 -3 -3 40.76 5.76
 -7 -3 3 50.39 5.65
 7 -3 -3 45.63 5.21
 -7 -3 2 158.45 9.92
 7 -3 -2 159.5 9.41
 7 -3 -2 151.89 11.03
 -7 -3 2 160.59 11.87
 -7 -3 1 97.36 7.83
 7 -3 -1 88.74 6.89
 7 -3 -1 84.36 8.36
 -7 -3 1 91.76 9.22
 -7 -3 0 112.54 8.64
 7 -3 0 121.45 8.14
 7 -3 0 114.94 9.87
 -7 -3 0 127.53 10.98
 -7 -3 -1 26.37 5.37
 7 -3 1 29.99 5.51
 7 -3 1 29.64 4.11
 -7 -3 -1 36.93 5.14
 -7 -3 -2 4.59 3.2
 7 -3 2 1.45 2.11
 -7 -3 -2 5.21 3.07
 -7 -3 -2 7.77 2.86
 7 -3 3 23.52 5.34
 -7 -3 -3 23.8 5.49
 7 -3 3 25.83 4.65
 -7 -3 -3 13.66 3.61
 7 -3 4 25.08 5.37
 -7 -3 -4 32.15 6.67
 7 -3 4 21.64 4.41
 7 -3 4 13.83 3.99
 7 -3 5 0.15 2.77
 -7 -3 -5 3.3 2.9
 7 -3 5 -5.57 3.22
 -7 -3 -6 6.03 3.93
 7 -3 6 11.03 4.5
 7 -3 6 5.99 3.03
 -7 -2 14 15.39 4.94
 7 -2 -13 26.45 6.32
 -7 -2 13 36.13 6.94
 -7 -2 13 32.38 6.49
 7 -2 -12 7.44 3.59
 -7 -2 12 6.03 3.63
 -7 -2 12 9.69 3.94
 -7 -2 12 4.27 2.75
 7 -2 -11 -0.81 2.26
 -7 -2 11 -1.52 2.24
 -7 -2 11 3.9 3.14
 -7 -2 11 1.7 2.8
 7 -2 -10 10.35 3.97
 -7 -2 10 17.92 4.38
 -7 -2 10 12.18 4.23
 7 -2 -10 14.33 3.06
 -7 -2 10 9.16 3.32
 -7 -2 9 164.17 12.22
 7 -2 -9 166.51 12.77
 7 -2 -9 168.26 9.85
 -7 -2 9 167.59 12.29
 -7 -2 8 0.08 1.86
 7 -2 -8 2.29 2.04
 7 -2 -8 2.73 2.48
 -7 -2 8 2.62 2.06
 -7 -2 7 418.04 18.62
 7 -2 -7 414.38 19.16
 7 -2 -7 438.47 16.36
 -7 -2 7 457.93 19.76
 -7 -2 6 112.38 9.02
 7 -2 -6 106.61 9.18
 7 -2 -6 119.07 8.19
 -7 -2 6 135.67 10.35
 -7 -2 5 293.3 14.24
 7 -2 -5 249.24 13.54
 7 -2 -5 260.91 12.51
 -7 -2 5 254.04 14.38
 -7 -2 4 128.07 9.05
 7 -2 -4 124.51 9.03
 7 -2 -4 104.68 7.85
 -7 -2 4 118.59 4.82
 -7 -2 4 108.51 9.4
 -7 -2 3 83.13 7.17
 7 -2 -3 79.66 7
 7 -2 -3 78.13 6.9
 -7 -2 3 67.32 4.41
 -7 -2 3 72.17 7.66
 -7 -2 2 342.87 15.01
 7 -2 -2 336.06 14.61
 7 -2 -2 322.62 14.61
 -7 -2 2 338.93 16.81
 -7 -2 1 241.09 12.7
 7 -2 -1 222.77 11.62
 7 -2 -1 230.86 12.48
 -7 -2 1 254.73 14.56
 -7 -2 0 154.52 10.37
 7 -2 0 170.37 10.21
 7 -2 0 179.19 11.25
 -7 -2 0 164.86 11.95
 -7 -2 -1 59.66 7.45
 -7 -2 -1 63.29 6.8
 7 -2 1 63.8 6.34
 7 -2 1 66.48 7.18
 -7 -2 -2 43.82 6.62
 7 -2 2 44.06 6.11
 7 -2 2 39.79 5.94
 -7 -2 -2 47.31 6.18
 7 -2 3 66.72 7.6
 -7 -2 -3 85.25 8.6
 -7 -2 -3 88.14 9.85
 7 -2 3 68.11 7.86
 7 -2 4 56.36 7.5
 -7 -2 -4 62.6 8.9
 7 -2 4 74 8.09
 -7 -2 -4 46.51 6.86
 7 -2 5 116.19 10.55
 -7 -2 -5 140.83 13.26
 7 -2 5 125.08 11.57
 -7 -2 -6 34.94 7.07
 7 -2 6 34.85 6.04
 -7 -2 -7 3.51 3.88
 7 -2 7 -0.9 2.2
 7 -2 8 1.11 2.41
 -7 -1 15 1.84 2.86
 -7 -1 14 11.81 4.29
 7 -1 -13 -0.34 2.35
 -7 -1 13 3.92 3.13
 -7 -1 13 0.48 2.35
 7 -1 -12 22.98 5.62
 -7 -1 12 25.87 5.75
 -7 -1 12 19.22 4.74
 -7 -1 12 30.32 6.18
 7 -1 -11 -3.83 2.99
 -7 -1 11 -2.46 2.85
 -7 -1 11 2.6 2.49
 -7 -1 11 2.06 3.06
 7 -1 -10 23.95 5.22
 -7 -1 10 16.14 4.13
 -7 -1 10 13.06 4.07
 -7 -1 9 17.3 4.23
 7 -1 -9 18.02 2.82
 7 -1 -9 15.96 4.18
 -7 -1 9 26.33 4.87
 -7 -1 8 64.89 7.43
 7 -1 -8 63.79 7.54
 7 -1 -8 64.01 4.97
 -7 -1 8 61.74 7.22
 -7 -1 7 29.5 4.91
 7 -1 -7 30.95 5.35
 -7 -1 7 26.06 4.63
 7 -1 -7 31.52 3.53
 -7 -1 6 71.84 7.21
 7 -1 -6 73.78 7.66
 7 -1 -6 83.12 5.58
 -7 -1 6 74.2 7.46
 -7 -1 5 56.33 6.18
 7 -1 -5 50.51 6.08
 7 -1 -5 64.37 4.93
 -7 -1 5 54.11 6.43
 -7 -1 4 48.71 5.62
 7 -1 -4 46.98 5.63
 -7 -1 4 37.79 2.84
 7 -1 -4 41.56 4.08
 -7 -1 4 54.47 6.33
 -7 -1 3 278.33 13.59
 7 -1 -3 266.16 13.45
 -7 -1 3 270 9.75
 7 -1 -3 291.08 11.63
 -7 -1 3 285.68 14.72
 -7 -1 2 1293.51 33.42
 7 -1 -2 1236.53 32.75
 7 -1 -2 1241.83 29.72
 -7 -1 2 1279.02 34.83
 -7 -1 1 307.61 14.67
 7 -1 -1 278.11 13.74
 7 -1 -1 275.17 12.51
 -7 -1 1 281.08 14.86
 -7 -1 0 962.54 28.86
 7 -1 0 941.29 27.69
 7 -1 0 921.17 26.47
 -7 -1 0 936.56 29.87
 -7 -1 -1 39.05 5.95
 7 -1 1 35.79 4.93
 7 -1 1 32.61 4.88
 -7 -1 -1 39.66 5.55
 7 -1 2 70.84 7.81
 -7 -1 -2 88.9 8.71
 7 -1 2 79.41 7.65
 -7 -1 -2 87.76 8.92
 -7 -1 -3 15.6 4.38
 7 -1 3 15.06 3.95
 7 -1 3 13.89 3.88
 -7 -1 -3 14.56 3.88
 -7 -1 -4 55.57 7.91
 7 -1 4 48.9 6.83
 7 -1 4 44.89 6.17
 -7 -1 -4 38.92 6.33
 -7 -1 -5 16.17 4.99
 7 -1 5 21.01 4.68
 7 -1 5 10.37 3.4
 -7 -1 -5 14.65 4.04
 7 -1 5 12.69 3.07
 -7 -1 -6 9.03 3.84
 7 -1 6 16.66 4.3
 -7 -1 -6 13.89 4.15
 7 -1 6 22.6 4.84
 -7 -1 -7 6.51 3.55
 7 -1 7 9.15 3.74
 -7 -1 -7 11.29 4.24
 7 -1 7 12.73 3.89
 -7 -1 -8 5.39 2.84
 7 -1 8 3.61 2.73
 7 0 -14 -2.65 3.32
 -7 0 14 7.73 3.86
 7 0 -13 47.71 8.09
 -7 0 13 38.02 7.21
 -7 0 13 45.21 6.85
 7 0 -12 -1.07 2.68
 -7 0 12 1.44 2.04
 -7 0 12 0.81 1.78
 7 0 -11 17.48 5
 -7 0 11 12.86 4.01
 7 0 -11 8.02 2.49
 -7 0 11 11.89 3.8
 -7 0 11 10.84 3.95
 7 0 -10 3.8 2.22
 7 0 -10 7.57 3.5
 -7 0 10 2.07 2.35
 -7 0 10 4.98 2.73
 7 0 -9 52.14 7.25
 -7 0 9 41.26 6.42
 7 0 -9 44.34 5.41
 -7 0 9 47.1 6.38
 -7 0 8 40.83 5.87
 7 0 -8 35.46 5.93
 -7 0 8 24.98 4.91
 7 0 -8 35.31 2.96
 7 0 -8 38.78 4.98
 -7 0 7 520.52 20.89
 7 0 -7 558.51 22.42
 7 0 -7 568.74 14.9
 7 0 -7 503.76 10.99
 -7 0 7 529.86 20.89
 -7 0 6 90.83 8.13
 7 0 -6 102.17 8.91
 7 0 -6 107.28 6.22
 7 0 -6 101.07 4.21
 -7 0 6 103 8.57
 -7 0 5 300.59 14.61
 7 0 -5 305.68 15.36
 7 0 -5 321.97 11.76
 -7 0 5 282.11 8.82
 7 0 -5 314.64 8.97
 -7 0 5 296.85 14.65
 -7 0 4 148.37 9.94
 7 0 -4 139.31 9.88
 7 0 -4 137.74 7.8
 -7 0 4 127.21 6.31
 7 0 -4 136.02 6.2
 -7 0 4 142.67 9.87
 -7 0 3 8.76 2.8
 7 0 -3 5.47 1.47
 7 0 -3 4.62 2.18
 -7 0 3 6.97 2.53
 -7 0 2 -0.03 1.67
 7 0 -2 -0.16 0.97
 7 0 -2 -0.72 1.37
 -7 0 2 -1.97 1.88
 7 0 -2 -1.06 1.8
 -7 0 1 515.49 20.05
 7 0 -1 519.69 19.89
 7 0 -1 512.31 17.88
 7 0 -1 528.29 16.84
 -7 0 1 538.37 20.27
 -7 0 0 2.62 2.4
 7 0 0 -5.05 2.07
 -7 0 0 -0.19 0.98
 7 0 0 0.74 1.69
 -7 0 0 -0.14 1.71
 7 0 0 0.15 1.81
 -7 0 -1 9.46 2.92
 7 0 1 13.24 3.77
 7 0 1 12.5 3.41
 -7 0 -1 9.52 3.05
 7 0 1 10.79 2.98
 7 0 2 127.85 10.8
 -7 0 -2 145.91 11.4
 7 0 2 148 11.01
 7 0 2 160.42 10.47
 7 0 2 147.77 9.59
 -7 0 -2 143.84 10.95
 7 0 3 485.69 17.5
 7 0 3 497.64 22.53
 -7 0 -3 488.06 22.5
 7 0 3 514.21 20.29
 7 0 3 532.53 18.96
 7 0 4 146.38 9.39
 7 0 4 156.82 12.8
 -7 0 -4 146.65 12.53
 7 0 4 149.32 10.86
 7 0 4 164.45 10.11
 -7 0 -4 155.77 12.55
 7 0 5 168.07 13.57
 -7 0 -5 202.3 15.25
 7 0 5 192.58 12.78
 7 0 5 175.06 10.54
 -7 0 -5 186.23 14.16
 -7 0 -6 20.41 5.21
 7 0 6 42.96 7.13
 -7 0 -6 21.33 5.2
 7 0 6 43.81 6.38
 -7 0 -7 8.42 4.05
 7 0 7 6.31 3.61
 -7 0 -7 6.38 3.29
 7 0 7 2.93 1.8
 -7 0 -8 0.29 2.91
 -7 0 -8 -3.05 2.55
 7 0 8 -1.84 2.26
 -7 0 -9 15.02 4.79
 7 1 -14 0.52 2.47
 -7 1 14 3.45 2.94
 7 1 -13 -3.37 3.39
 -7 1 13 2.74 3.16
 7 1 -12 17.98 5.21
 -7 1 12 27.31 5.7
 -7 1 12 20.49 4.24
 7 1 -11 -0.99 2.6
 -7 1 11 2.82 2.84
 7 1 -11 3.12 2.03
 -7 1 11 1.74 2.14
 -7 1 11 -0.01 2.65
 7 1 -10 12.85 4.21
 -7 1 10 19.42 4.65
 7 1 -10 18.1 3.83
 -7 1 10 15.82 4.5
 7 1 -9 16.51 3.57
 7 1 -9 18.98 4.5
 -7 1 9 23.54 4.69
 -7 1 9 22.31 4.65
 -7 1 8 74.95 7.89
 7 1 -8 58.62 7.35
 7 1 -8 66.76 4.1
 7 1 -8 80.06 7.33
 -7 1 8 75.93 7.78
 -7 1 7 31.75 5.02
 7 1 -7 34.31 5.49
 -7 1 7 24.29 4.48
 7 1 -7 30.15 3.07
 7 1 -7 25.62 4.26
 -7 1 6 75.66 7.45
 7 1 -6 89.32 8.39
 7 1 -6 74.03 5.21
 7 1 -6 79.42 7.21
 -7 1 6 70.37 6.93
 -7 1 5 55.39 6.25
 7 1 -5 52.31 6.45
 7 1 -5 57.86 4.79
 7 1 -5 57.54 6.08
 -7 1 5 68.72 6.66
 -7 1 4 40.16 5.14
 7 1 -4 40.11 5.06
 7 1 -4 41.84 5.52
 -7 1 4 27.2 4.48
 7 1 -4 43.49 4.34
 -7 1 3 279.27 14.09
 7 1 -3 280.9 14.51
 7 1 -3 284.19 12.06
 7 1 -3 270.48 13.37
 -7 1 3 286.98 13.68
 -7 1 2 1292.15 34.27
 7 1 -2 1232.94 34.08
 7 1 -2 1242.99 30.53
 7 1 -2 1222.63 32.11
 -7 1 2 1249.61 32.67
 -7 1 1 237.36 9.85
 -7 1 1 262.62 8.17
 -7 1 1 257.3 14.04
 7 1 -1 279.91 14.59
 7 1 -1 280.1 12.74
 7 1 -1 272.67 13.22
 -7 1 1 258.47 13.23
 -7 1 0 877.79 21.26
 -7 1 0 898.63 17.64
 -7 1 0 910.66 29.16
 7 1 0 928.43 29.47
 7 1 0 931.28 26.55
 7 1 0 971.99 27.19
 -7 1 0 945.33 27.6
 -7 1 -1 25.92 4.41
 7 1 1 24.14 4.67
 7 1 1 31.79 5.28
 7 1 1 29.3 4.44
 7 1 1 25.75 4.29
 -7 1 -1 23.05 4.84
 7 1 2 65.54 6.57
 7 1 2 72.58 8.27
 -7 1 -2 85.1 9.04
 7 1 2 65.17 7.71
 7 1 2 87.53 7.72
 7 1 2 71.37 6.83
 -7 1 -2 77.91 7.65
 7 1 3 11.38 3.18
 -7 1 -3 10.79 3.29
 7 1 3 15.83 3.54
 7 1 3 21.04 4.73
 7 1 3 11.55 3.05
 -7 1 -3 10.53 3.79
 7 1 4 42.77 5.53
 -7 1 -4 45.79 6.57
 7 1 4 54.87 7.87
 7 1 4 56.76 6.83
 7 1 4 45.14 5.57
 -7 1 -4 49.28 7.54
 7 1 5 16.46 3.85
 7 1 5 16.92 3.8
 -7 1 -5 11.91 3.95
 7 1 5 14.48 4.49
 7 1 5 14.3 3.14
 -7 1 -5 14.01 4.5
 7 1 5 14.88 4.11
 -7 1 -5 19.52 4.94
 7 1 6 19.28 4.33
 -7 1 -6 20.46 4.81
 7 1 6 20.62 5.46
 -7 1 -6 32.85 6.35
 7 1 6 16.48 4.22
 7 1 7 14.58 4.61
 -7 1 -7 3.73 2.97
 -7 1 -7 4.6 3.53
 7 1 7 11.85 3.59
 -7 1 -8 7.29 3.83
 -7 1 -8 4.51 3.42
 7 1 8 5.62 2.93
 7 2 -14 16.65 5.52
 -7 2 14 9.79 4.57
 7 2 -13 41.31 7.62
 -7 2 13 27.06 6.03
 7 2 -12 6.09 3.1
 -7 2 12 5.6 3.29
 7 2 -11 2.98 2.17
 7 2 -11 -0.83 2.36
 -7 2 11 0.56 1.86
 7 2 -10 16.72 3.87
 7 2 -10 14.92 4.44
 -7 2 10 15.04 4.09
 -7 2 10 20.32 4.81
 -7 2 9 160.5 11.95
 7 2 -9 166.82 12.78
 7 2 -9 162.66 11.16
 -7 2 9 148.06 11.38
 7 2 -8 2.15 2.26
 7 2 -8 1.33 2.52
 -7 2 8 6 2.96
 -7 2 8 -0.56 2.18
 -7 2 7 399.46 18.2
 7 2 -7 427.99 19.69
 7 2 -7 413.35 18.16
 7 2 -7 427.04 13.47
 -7 2 7 434.37 18.34
 -7 2 6 126.21 9.64
 7 2 -6 119.95 10.06
 7 2 -6 116.18 7
 7 2 -6 120.86 9.5
 -7 2 6 131.36 9.31
 -7 2 5 269.38 14.14
 7 2 -5 261.11 14.62
 7 2 -5 253.06 11.13
 7 2 -5 270.68 14.31
 -7 2 5 265.62 13.1
 -7 2 4 114.71 9.13
 7 2 -4 111.16 9.32
 7 2 -4 99.26 7.08
 7 2 -4 117.11 9.21
 -7 2 4 114.02 8.16
 -7 2 3 76.79 7.45
 7 2 -3 77.12 7.74
 7 2 -3 77.87 6.45
 7 2 -3 75.51 7.35
 -7 2 3 74.88 6.58
 -7 2 2 293.73 10.5
 -7 2 2 334.05 15.98
 7 2 -2 322.27 16.24
 7 2 -2 333.67 14.22
 7 2 -2 352.16 16.15
 -7 2 2 336.91 14.33
 7 2 -1 241.05 14.41
 -7 2 1 249.34 14.12
 7 2 -1 239.73 14.1
 7 2 -1 243.08 12.4
 7 2 -1 248.28 13.53
 -7 2 1 252.75 12.39
 7 2 0 181.81 12.65
 -7 2 0 157.18 11.54
 7 2 0 168.25 12.04
 7 2 0 171.12 11.13
 7 2 0 175.62 10.75
 -7 2 0 173.13 10.22
 7 2 1 57.68 6.66
 7 2 1 62.85 7.79
 -7 2 -1 75.03 8.36
 7 2 1 62.17 7.5
 7 2 1 73.38 7.27
 7 2 1 61.14 6.61
 -7 2 -1 76.09 6.86
 -7 2 -2 41.51 5.27
 7 2 2 41.74 5.79
 7 2 2 40.2 6.6
 7 2 2 44.64 5.81
 7 2 2 44.09 5.9
 -7 2 -2 38.11 6.21
 7 2 3 76.05 7.95
 7 2 3 74.26 9.03
 -7 2 -3 77.58 9.25
 7 2 3 78 7.6
 7 2 3 80.19 7.98
 -7 2 -3 79.48 7.86
 -7 2 -3 79.81 7.59
 7 2 4 59.38 7.16
 7 2 4 53.85 8.11
 7 2 4 56.01 6.48
 -7 2 -4 71.89 8.87
 7 2 4 68.13 7.66
 -7 2 -4 61.28 8.64
 -7 2 -4 60.05 7.13
 -7 2 -4 58.39 6.84
 7 2 5 117.27 10.45
 7 2 5 108.54 9.67
 -7 2 -5 133.5 12.35
 7 2 5 111.28 9.19
 7 2 5 116.25 12.14
 -7 2 -5 109.62 11.86
 7 2 5 134.82 11.07
 -7 2 -5 120.31 10.3
 -7 2 -5 117.63 10.14
 7 2 6 28.98 5.59
 7 2 6 22.33 4.74
 -7 2 -6 25.11 5.15
 7 2 6 28.8 6.34
 -7 2 -6 29.93 6.63
 7 2 6 25.6 5.21
 7 2 7 -1.02 2.14
 -7 2 -7 5.54 3.05
 7 2 7 3.21 2.46
 7 2 8 0.88 2.48
 7 2 8 5.01 3.19
 7 3 -14 11.34 4.62
 -7 3 14 8.64 4.65
 -7 3 13 6.27 3.73
 7 3 -13 0.43 3.18
 -7 3 13 -2.17 2.85
 -7 3 12 34.93 6.6
 -7 3 12 38.31 6.81
 7 3 -12 41.26 7.32
 -7 3 12 40.09 6.75
 -7 3 11 30.55 5.72
 7 3 -11 24.75 5.49
 -7 3 11 18.02 4.75
 7 3 -11 28.29 5.19
 -7 3 11 25.95 5.73
 -7 3 10 3.76 2.58
 7 3 -10 10.53 3.82
 -7 3 10 6.13 3.1
 -7 3 10 7.91 3.15
 7 3 -10 3.58 2.48
 -7 3 9 49.23 6.43
 7 3 -9 46.33 6.96
 -7 3 9 25.93 5.04
 7 3 -9 32.93 5.43
 -7 3 8 3.44 2.41
 7 3 -8 3.77 2.63
 -7 3 8 11.56 3.38
 -7 3 8 10.12 3.24
 7 3 -8 7.91 2.93
 7 3 -7 18.56 4.26
 -7 3 7 11.38 2.86
 7 3 -7 17.16 4.18
 -7 3 7 10.09 3.08
 -7 3 7 20.47 3.92
 7 3 -6 21.83 4.31
 -7 3 6 17.27 3.11
 7 3 -6 18.15 4.12
 -7 3 6 15.04 3.48
 7 3 -6 18.65 3.11
 -7 3 6 18.29 3.71
 -7 3 5 84.42 6.08
 -7 3 5 77.33 7.66
 7 3 -5 81.6 8.18
 7 3 -5 89.23 8.58
 7 3 -5 80.85 6.56
 -7 3 5 73.62 6.57
 -7 3 4 28.38 3.94
 7 3 -4 24.62 4.56
 -7 3 4 25.79 2.99
 7 3 -4 29.78 5.17
 -7 3 4 27.24 4.53
 7 3 -4 29.94 4.33
 -7 3 3 45.08 3.19
 7 3 -3 55.52 6.8
 7 3 -3 50.49 6.45
 7 3 -3 44.97 5.28
 -7 3 3 53.46 6.37
 -7 3 3 44.45 4.82
 7 3 -2 154.94 11.36
 -7 3 2 146.42 10.8
 7 3 -2 157.49 11.32
 7 3 -2 151.31 11.33
 7 3 -2 153.2 10.06
 -7 3 2 171.35 9.29
 7 3 -1 91.13 8.97
 -7 3 1 88.59 8.65
 7 3 -1 91.67 8.73
 7 3 -1 93.48 9.1
 7 3 -1 95.13 8.21
 -7 3 1 103.01 7.18
 7 3 0 113.99 10.39
 7 3 0 104.22 9.32
 -7 3 0 105.12 9.73
 7 3 0 134.86 11.11
 7 3 0 112.23 9.1
 -7 3 0 117.92 7.88
 7 3 1 32.46 5.23
 -7 3 -1 30.08 4.12
 7 3 1 20.92 4.65
 7 3 1 22.59 4.91
 7 3 1 23.89 5.07
 7 3 1 31.63 5.19
 -7 3 -1 27.13 5.39
 -7 3 -2 2.79 1.68
 7 3 2 5.53 2.81
 7 3 2 7.26 3.67
 -7 3 -2 5.73 3.07
 7 3 2 2.95 1.75
 -7 3 -2 4.82 3.08
 7 3 2 6.91 3
 7 3 3 25.71 5.21
 -7 3 -3 20.03 4.04
 7 3 3 28.24 6.19
 -7 3 -3 23.49 5.71
 7 3 3 21.38 4.68
 -7 3 -3 21.07 5.25
 7 3 3 17.87 4.06
 7 3 4 16.35 4.58
 -7 3 -4 21.06 4.29
 7 3 4 26.74 6.28
 -7 3 -4 16.99 4.85
 7 3 4 29.79 5.32
 7 3 4 16.68 4
 -7 3 -4 27.55 6.15
 7 3 5 -1.74 2.32
 7 3 5 4.49 2.71
 -7 3 -5 1.48 1.81
 7 3 5 2.46 3.26
 -7 3 -5 2.96 2.79
 7 3 5 3.79 3
 7 3 6 2.64 2.74
 7 3 6 7.26 3.32
 -7 3 -6 4.88 3.25
 7 3 6 4 2.93
 7 3 7 2.92 3.06
 7 3 7 -2.56 2.41
 7 3 7 -0.57 2.12
 7 4 -13 -1.5 2.14
 -7 4 12 -0.26 1.88
 -7 4 12 -2.55 2.56
 7 4 -12 -0.55 2.88
 -7 4 12 1.54 2.46
 -7 4 11 6.17 3.14
 -7 4 11 0.47 2.15
 7 4 -11 -1.6 2.52
 7 4 -11 1.46 2.51
 -7 4 11 5.16 2.68
 -7 4 10 46.73 6.83
 -7 4 10 41.92 6.37
 -7 4 10 38.26 6.05
 7 4 -10 43.33 6.52
 7 4 -10 39.84 6.44
 -7 4 10 51.87 7.16
 -7 4 9 39.31 5.95
 -7 4 9 46.68 6.48
 -7 4 9 32.5 5.76
 7 4 -9 48.66 7.15
 7 4 -9 41.11 6.51
 -7 4 9 36.44 5.86
 -7 4 8 21.55 4.26
 -7 4 8 16.01 3.77
 -7 4 8 18.38 4.33
 7 4 -8 17.16 4.18
 -7 4 8 17.1 4.03
 7 4 -8 24.46 5.1
 -7 4 7 39.81 5.24
 -7 4 7 37.02 5.18
 -7 4 7 39.95 6.17
 7 4 -7 25.47 5.08
 -7 4 7 34.96 5.43
 7 4 -7 42.04 6.51
 -7 4 6 72.18 6.46
 -7 4 6 65.16 6.24
 -7 4 6 76.72 8.26
 7 4 -6 72.6 8.45
 -7 4 6 76.03 7.71
 7 4 -6 68.54 7.86
 -7 4 6 73.59 6.83
 -7 4 5 40.97 4.61
 -7 4 5 29.85 3.83
 -7 4 5 35.18 5.82
 7 4 -5 33.04 5.06
 7 4 -5 42.12 6.18
 -7 4 5 41.36 5.69
 7 4 -5 32.11 5.72
 -7 4 5 35.67 4.48
 -7 4 4 161.37 12.04
 7 4 -4 156.06 12.25
 7 4 -4 157.06 11.16
 -7 4 4 170.35 11.59
 7 4 -4 142.73 11.14
 7 4 -4 154.79 10.3
 -7 4 4 165 9.2
 -7 4 3 21.59 4.69
 7 4 -3 14.42 3.79
 7 4 -3 10.63 3.3
 7 4 -3 17.59 3.92
 -7 4 3 20.24 4.12
 7 4 -3 27.01 5.12
 -7 4 3 15.9 2.84
 -7 4 2 21.64 3.09
 -7 4 2 29.48 5.42
 7 4 -2 21.76 4.51
 7 4 -2 20.46 4.43
 7 4 -2 27.8 4.65
 -7 4 2 21.38 4.29
 7 4 -2 24.46 5
 -7 4 1 65.62 7.68
 -7 4 1 82.62 8.73
 7 4 -1 59.43 7.64
 7 4 -1 72.49 8.26
 -7 4 1 70.95 8.06
 7 4 -1 62.91 7.77
 7 4 -1 66.01 7.25
 -7 4 0 67.85 7.9
 7 4 0 65.57 7.97
 7 4 0 54.36 7.54
 -7 4 0 49.76 6.96
 7 4 0 63.12 8.01
 7 4 0 64.67 7.32
 -7 4 0 54.42 7.38
 7 4 1 57.42 7.96
 -7 4 -1 70.16 8.43
 -7 4 -1 64.43 7.84
 7 4 1 76.03 8.57
 7 4 1 65.72 8.61
 7 4 1 77.22 8.12
 -7 4 -1 63.44 8.37
 7 4 2 71.15 8.9
 -7 4 -2 85.78 9.62
 -7 4 -2 75.55 8.41
 7 4 2 69.23 8.2
 7 4 2 79.26 9.75
 7 4 2 75.97 8.44
 -7 4 -2 68.9 8.76
 7 4 3 83.44 9.75
 7 4 3 89.5 9.22
 -7 4 -3 90.37 10.31
 -7 4 -3 80.47 8.75
 7 4 3 78.33 9.99
 7 4 3 83.46 8.97
 -7 4 -3 66.66 9.18
 7 4 4 20.45 5.49
 -7 4 -4 18.81 4.52
 7 4 4 26.37 6.41
 7 4 4 23.77 4.97
 -7 4 -4 21.83 5.93
 7 4 4 26.19 5.53
 7 4 5 15.29 4.9
 -7 4 -5 17.11 5.58
 7 4 5 15.69 4.41
 7 4 6 7.72 3.63
 7 4 7 -0.42 2.39
 -7 5 11 3.71 2.86
 -7 5 11 7.74 3.52
 -7 5 10 52.43 7.43
 -7 5 10 45.38 7.12
 7 5 -10 25.34 5.59
 -7 5 10 43.77 7.09
 -7 5 9 56.69 7.35
 -7 5 9 32.67 5.88
 -7 5 9 47.32 7.3
 7 5 -9 29.76 6.23
 7 5 -9 47.26 6.94
 -7 5 8 19.62 4.33
 -7 5 8 17.76 4.24
 -7 5 8 20.94 5.28
 7 5 -8 19.27 5.25
 7 5 -8 14.61 4.18
 -7 5 7 35.48 6.3
 7 5 -7 24.9 5.61
 7 5 -7 24.54 5.03
 -7 5 7 23.11 4.53
 -7 5 6 26.92 5.6
 7 5 -6 24.75 5.73
 7 5 -6 28.48 5.3
 -7 5 6 26.37 4.76
 -7 5 5 54.92 7.63
 7 5 -5 55.71 6.55
 7 5 -5 46.77 7.32
 7 5 -5 44.94 6.46
 -7 5 5 43.06 5.88
 7 5 -4 9.97 3.25
 -7 5 4 10.49 3.12
 7 5 -4 17.2 4.5
 7 5 -4 11.02 3.63
 -7 5 4 15.77 4.52
 -7 5 4 15.69 4.05
 7 5 -3 76.43 9.13
 -7 5 3 76.11 7.82
 -7 5 3 81.1 9.23
 7 5 -3 66.29 7.65
 -7 5 3 68.89 7.64
 7 5 -3 88.91 9.1
 -7 5 2 70.86 8.65
 7 5 -2 59.03 7.43
 -7 5 2 51.86 6.74
 7 5 -2 53.31 7.61
 7 5 -2 62.36 7.82
 -7 5 2 42.83 6.33
 -7 5 1 15.42 4.4
 7 5 -1 14.82 4.33
 7 5 -1 14.29 4.53
 -7 5 1 15.23 4.19
 7 5 -1 17.86 4.51
 7 5 -1 22.27 4.84
 -7 5 1 19.31 4.65
 -7 5 0 55.63 7.84
 7 5 0 56.87 7.89
 7 5 0 60.61 8.31
 -7 5 0 49.67 7.08
 7 5 0 48.94 7.06
 -7 5 0 59.29 7.89
 7 5 1 32.89 6.48
 -7 5 -1 34.86 6.3
 7 5 1 43.03 7.26
 7 5 1 24.62 5.34
 -7 5 -1 45.35 7.05
 7 5 1 40.61 6.54
 -7 5 -1 33.03 6.4
 7 5 2 7.74 4.01
 -7 5 -2 3.57 2.76
 7 5 2 1.26 2.18
 7 5 2 3.91 2.66
 -7 5 -2 7.46 4.07
 7 5 2 3.05 2.39
 -7 5 -2 2.35 2.25
 7 5 3 17.48 5.54
 -7 5 -3 12.66 4.14
 7 5 3 18.35 4.98
 7 5 3 17.17 5.18
 -7 5 -3 20.45 5.46
 7 5 3 23.25 5.69
 7 5 4 -5.38 3.65
 7 5 4 -1.99 2.37
 -7 5 -4 2.66 2.35
 -7 5 -4 5.08 3.41
 7 6 -10 13.65 4.85
 -7 6 10 16.64 4.91
 7 6 -9 16.86 5.16
 -7 6 9 15.93 5.02
 7 6 -8 7.78 3.87
 -7 6 8 9.34 4.12
 7 6 -7 8.01 3.58
 -7 6 7 8.3 4.14
 7 6 -6 89.21 10.65
 -7 6 6 96.46 11
 -7 6 5 44.32 7.6
 7 6 -5 30.42 6.53
 7 6 -5 37.82 6.11
 7 6 -4 119.33 12.22
 -7 6 4 102.71 11.36
 7 6 -4 90.85 9.52
 -7 6 3 26.76 5.95
 7 6 -3 19.6 5.54
 7 6 -3 19.54 4.72
 -7 6 2 28.77 6.05
 7 6 -2 24.29 5.56
 -7 6 2 19.5 4.46
 7 6 -2 29.17 5.69
 7 6 -1 15.79 5.21
 -7 6 1 16.97 5.06
 7 6 -1 16.08 4.48
 -7 6 1 20.63 4.65
 7 6 0 3.05 3.63
 -7 6 0 10.06 4.13
 7 6 0 8.21 3.39
 -7 6 0 1.72 2.59
 7 6 1 46.78 7.82
 -7 6 -1 42.94 7.76
 -7 6 -1 48.83 7.79
 -7 6 -1 37.03 6.68
 7 6 2 24.56 5.92
 -7 6 -2 30.15 6.39
 -7 6 -2 39.19 7.63
 7 6 3 28.71 6.33
 -7 6 -3 34.14 6.88
 7 6 4 2.08 2.86
 -7 7 -1 8.21 4.18
 -8 -7 4 4.2 3.13
 8 -6 -9 -1.25 3.42
 8 -6 -8 -0.25 2.75
 8 -6 -7 17.17 5.41
 -8 -6 7 9.71 4.51
 -8 -6 6 10.94 4.12
 8 -6 -6 15.72 5.32
 -8 -6 6 10.88 4.3
 -8 -6 5 2.38 2.73
 8 -6 -5 12.03 5.26
 -8 -6 5 7.94 3.96
 -8 -6 4 34.96 6.71
 8 -6 -4 35.31 7.25
 -8 -6 3 10 4.19
 8 -6 -3 15.44 5.22
 -8 -6 2 42.72 7.47
 8 -6 -2 44.18 8.55
 -8 -6 1 5.83 3.43
 8 -6 -1 -1.8 3.45
 -8 -6 1 10.06 4.21
 -8 -6 0 7.68 4.1
 -8 -6 0 1.39 2.22
 -8 -6 -1 2.28 2.88
 -8 -6 -1 9.59 4.36
 -8 -5 11 15.47 4.57
 -8 -5 10 23.64 5.69
 8 -5 -10 38.91 6.94
 -8 -5 10 21.49 5.15
 -8 -5 9 20.99 5.18
 8 -5 -9 23.91 5.44
 -8 -5 9 21.18 5.85
 -8 -5 8 21.22 5.07
 8 -5 -8 23.39 5.79
 -8 -5 8 24.97 6.4
 -8 -5 7 57.6 7.84
 8 -5 -7 52.68 8.04
 -8 -5 7 48.99 7.98
 -8 -5 6 5.44 3.13
 8 -5 -6 4.3 3
 -8 -5 5 7.47 3.62
 8 -5 -5 13.39 4.69
 -8 -5 4 62.49 8.44
 8 -5 -4 87.67 10.31
 -8 -5 3 17.86 5.14
 8 -5 -3 18.72 5.42
 -8 -5 2 72.55 9.2
 8 -5 -2 84.93 10.33
 -8 -5 1 24.22 5.6
 8 -5 -1 26 5.9
 -8 -5 0 26.77 5.91
 8 -5 0 30.15 6.66
 -8 -5 0 24.71 5.77
 -8 -5 -1 24.59 6.19
 8 -5 1 23.2 5.85
 -8 -5 -1 15.27 5.49
 -8 -5 -2 36.69 7.4
 8 -5 2 44.01 8.28
 -8 -5 -2 28.9 7
 8 -4 -12 8.37 3.77
 -8 -4 12 8.47 4.02
 -8 -4 12 9.46 3.95
 8 -4 -11 15.11 4.52
 -8 -4 11 13.42 4.58
 -8 -4 11 19.12 5.76
 -8 -4 11 16.03 4.51
 -8 -4 10 20.38 5.14
 8 -4 -10 27.4 5.81
 -8 -4 10 22.44 5.36
 -8 -4 10 19.22 5.62
 -8 -4 9 7.3 3.39
 8 -4 -9 1.36 2.51
 8 -4 -9 5.86 2.89
 -8 -4 9 9.01 3.44
 -8 -4 9 9.03 3.87
 -8 -4 8 49.88 7.22
 8 -4 -8 70.6 8.3
 -8 -4 8 70.11 8.15
 8 -4 -8 66.68 8.19
 -8 -4 7 101.36 9.41
 8 -4 -7 100.84 9.49
 8 -4 -7 94.34 9.69
 -8 -4 7 100.3 10.01
 -8 -4 6 31.77 5.92
 8 -4 -6 39.17 6.36
 8 -4 -6 28.66 4.92
 -8 -4 6 44.92 6.08
 -8 -4 5 119.98 9.65
 8 -4 -5 118.7 9.42
 8 -4 -5 129.16 11.29
 -8 -4 5 114.71 10.81
 -8 -4 4 64.17 8.32
 8 -4 -4 58.6 7.87
 -8 -4 4 67.21 6.98
 8 -4 -4 65.02 6.63
 -8 -4 3 59.33 8.12
 -8 -4 3 61.06 6.65
 8 -4 -3 67.01 8.42
 -8 -4 2 97.41 8.38
 8 -4 -2 106.9 10.64
 -8 -4 2 115.25 11.18
 -8 -4 1 24.01 5.47
 8 -4 -1 34.11 6.11
 -8 -4 1 30.99 4.87
 -8 -4 0 29.8 6.11
 8 -4 0 36.33 6.5
 -8 -4 -1 12.3 4.42
 8 -4 1 11.36 4.3
 -8 -4 -1 11.63 4.57
 -8 -4 -2 13.88 4.78
 8 -4 2 18.13 5.12
 -8 -4 -2 17.77 5.2
 -8 -4 -3 77.52 10.39
 -8 -4 -3 105.3 12.5
 8 -4 3 99.4 11.33
 -8 -4 -4 18.09 5.61
 8 -4 4 18.31 5.78
 -8 -4 -4 14.46 5.12
 -8 -3 13 -0.33 2.51
 8 -3 -12 7.69 3.72
 -8 -3 12 0.84 2.35
 -8 -3 12 -1.85 3.1
 -8 -3 12 6.48 3.14
 8 -3 -11 0.92 2.63
 -8 -3 11 12.97 4.56
 -8 -3 11 12.07 4.51
 -8 -3 11 13.31 4.21
 -8 -3 10 34.36 6.25
 8 -3 -10 39.15 6.93
 -8 -3 10 36.17 6.32
 -8 -3 10 41.41 7.21
 -8 -3 9 22.68 5.37
 8 -3 -9 17.64 3.83
 8 -3 -9 21.1 4.96
 -8 -3 9 21.95 4.97
 -8 -3 8 55.49 7.47
 8 -3 -8 44.86 6.07
 8 -3 -8 50.76 7.07
 -8 -3 8 42.42 6.35
 8 -3 -7 51.96 6.95
 -8 -3 7 58.05 7.09
 8 -3 -7 62.73 7.05
 -8 -3 7 69.57 8.28
 -8 -3 6 6.17 2.93
 8 -3 -6 0.61 2.24
 8 -3 -6 3.95 2.13
 -8 -3 6 1.87 1.34
 -8 -3 5 39.89 6.32
 8 -3 -5 55.66 6.62
 -8 -3 5 48.6 6.12
 8 -3 -5 60.1 6.94
 -8 -3 4 20.22 4.74
 8 -3 -4 18.8 4.07
 8 -3 -4 24.63 4.36
 -8 -3 4 20.05 3.88
 -8 -3 3 137.53 9.98
 8 -3 -3 126.51 9.33
 8 -3 -3 122.45 10.11
 -8 -3 3 139.62 11.67
 -8 -3 2 332.61 15.92
 8 -3 -2 315.94 14.8
 8 -3 -2 319.46 16.82
 -8 -3 2 330.48 18.44
 -8 -3 1 72.5 7.38
 8 -3 -1 66.55 6.68
 8 -3 -1 78.75 8.55
 -8 -3 1 76.78 9.18
 -8 -3 0 184.35 12.14
 8 -3 0 168.16 10.66
 8 -3 0 173.78 12.77
 -8 -3 0 168.16 13.63
 -8 -3 -1 91.6 8.83
 8 -3 1 89.5 9.34
 -8 -3 -1 95.53 10.45
 -8 -3 -2 26.95 6.01
 8 -3 2 25.36 5.52
 -8 -3 -2 21.89 5.46
 8 -3 2 38.23 6.01
 -8 -3 -2 34.02 5.79
 -8 -3 -3 27.46 6.07
 8 -3 3 29.16 5.99
 -8 -3 -3 25.03 5.84
 8 -3 3 25.05 5.15
 -8 -3 -3 26.68 5.18
 8 -3 4 26.43 6
 -8 -3 -4 25.63 6.33
 -8 -3 -4 16.16 4.37
 8 -3 5 7.36 3.68
 -8 -3 -5 3.55 3.2
 8 -2 -13 0.19 2.39
 -8 -2 13 4.49 2.94
 -8 -2 13 0.87 2.94
 -8 -2 13 -2.15 2.6
 8 -2 -12 4.95 3.11
 -8 -2 12 1.28 2.52
 -8 -2 12 8.64 3.91
 -8 -2 12 5.79 3.28
 8 -2 -11 10.79 3.93
 -8 -2 11 7.35 3.49
 -8 -2 11 4.07 2.96
 -8 -2 11 3.37 3.12
 -8 -2 10 2.37 2.53
 8 -2 -10 1.01 2.5
 -8 -2 10 -0.12 1.87
 -8 -2 9 11.44 3.83
 8 -2 -9 11.22 3.77
 -8 -2 9 9.42 3.76
 -8 -2 8 65.35 7.82
 8 -2 -8 57.41 7.52
 8 -2 -8 57.11 5.8
 -8 -2 8 66.69 8.17
 -8 -2 7 273.48 15.49
 8 -2 -7 266.16 15.82
 8 -2 -7 251.91 12.45
 -8 -2 7 257.97 15.48
 -8 -2 6 54 7.09
 -8 -2 6 59.14 6.92
 8 -2 -6 44.36 6.3
 8 -2 -6 55.37 5.97
 -8 -2 5 770.55 26.24
 8 -2 -5 786.29 26.87
 8 -2 -5 787.54 24.02
 -8 -2 5 788.82 28.38
 -8 -2 4 121.15 9.62
 8 -2 -4 127.48 9.83
 8 -2 -4 121.96 8.78
 -8 -2 4 122.78 10.72
 -8 -2 3 364.22 17.07
 8 -2 -3 398.78 17.4
 8 -2 -3 398.89 16.55
 -8 -2 3 383.82 19.26
 -8 -2 2 59.48 7.55
 -8 -2 2 65.1 6.99
 8 -2 -2 67.06 6.87
 8 -2 -2 66.53 6.8
 -8 -2 1 7.26 3.38
 8 -2 -1 3.83 2.24
 8 -2 -1 7.84 2.49
 -8 -2 1 1.91 1.64
 -8 -2 0 116.57 9.81
 8 -2 0 135.23 9.88
 8 -2 0 121.7 9.84
 -8 -2 0 132.89 11.53
 -8 -2 -1 15.89 4.3
 8 -2 1 10.97 3.36
 8 -2 1 13.47 3.41
 -8 -2 -1 15.22 3.98
 -8 -2 -2 19.27 5.07
 8 -2 2 18.33 4.52
 8 -2 2 14.68 3.97
 -8 -2 -2 20.49 4.49
 -8 -2 -3 19.6 5.14
 8 -2 3 19.48 4.96
 -8 -2 -3 19.17 5.49
 8 -2 3 26.27 5.34
 -8 -2 -3 28.49 5.55
 8 -2 4 19.19 4.8
 -8 -2 -4 25.61 6.34
 8 -2 4 13.03 4.1
 -8 -2 -4 16.38 4.69
 8 -2 5 31.72 6.57
 -8 -2 -5 46.28 8.23
 8 -2 5 32.44 6.1
 -8 -2 -6 67.49 10.16
 8 -2 6 50.28 7.7
 -8 -1 15 9.98 4.24
 -8 -1 14 7.93 3.83
 8 -1 -13 5.29 3.81
 -8 -1 13 4.93 3.47
 -8 -1 13 6.95 3.91
 -8 -1 13 9.65 4.21
 8 -1 -12 50.01 8.18
 -8 -1 12 65.47 8.94
 -8 -1 12 60.74 8.27
 -8 -1 12 60.46 8.59
 -8 -1 11 8.45 3.5
 -8 -1 11 8.69 3.67
 -8 -1 10 143.23 12.33
 8 -1 -10 160.15 13.54
 -8 -1 10 157.63 12.83
 -8 -1 9 38.05 6.21
 8 -1 -9 47.79 7.23
 -8 -1 9 51.17 7.11
 -8 -1 8 9.67 3.43
 8 -1 -8 6.15 3.07
 -8 -1 8 7 2.89
 -8 -1 7 63.59 7.41
 8 -1 -7 85.15 8.78
 8 -1 -7 71.36 5.26
 -8 -1 7 66.88 7.7
 -8 -1 6 80.73 8.13
 8 -1 -6 84.24 8.6
 8 -1 -6 89.35 5.95
 -8 -1 6 78.61 8.3
 -8 -1 5 28.03 5.14
 8 -1 -5 27.66 3.52
 8 -1 -5 22.81 4.61
 -8 -1 5 25.45 4.59
 -8 -1 4 394.04 17.86
 8 -1 -4 396.64 18.17
 8 -1 -4 415.92 14.59
 -8 -1 4 419.53 19.36
 -8 -1 3 181.63 11.75
 8 -1 -3 157.47 11.03
 8 -1 -3 153.77 8.89
 -8 -1 3 167.65 12
 -8 -1 2 437.69 19.01
 8 -1 -2 419.89 18.52
 8 -1 -2 428.35 16.24
 -8 -1 2 442.97 20.07
 -8 -1 1 199.94 12.81
 8 -1 -1 211.53 12.76
 8 -1 -1 228.65 12.01
 -8 -1 1 225.35 14.35
 -8 -1 0 328.21 17.09
 8 -1 0 367.86 17.37
 8 -1 0 336.77 15.6
 -8 -1 0 359.35 18.61
 -8 -1 -1 218.7 14.21
 8 -1 1 189.1 12.67
 8 -1 1 216.82 12.91
 -8 -1 -1 224.68 14.89
 -8 -1 -2 21.23 4.97
 8 -1 2 16.87 4.13
 8 -1 2 12.62 3.91
 -8 -1 -2 18 4.55
 -8 -1 -3 49.53 7.59
 -8 -1 -3 33.31 6.61
 8 -1 3 39.58 6.62
 8 -1 3 50.75 6.8
 -8 -1 -4 3.86 2.88
 8 -1 4 2.95 2.59
 8 -1 4 0.85 1.73
 8 -1 4 -0.55 2.06
 -8 -1 -4 1.95 2.6
 -8 -1 -5 28.38 6.31
 8 -1 5 32.92 6.21
 8 -1 5 27.15 5.51
 -8 -1 -5 33.16 6.63
 -8 -1 -6 -2.54 3.14
 8 -1 6 -2.58 2.26
 -8 -1 -6 3.77 2.67
 8 -1 6 2.78 2.75
 8 -1 7 18.18 5.31
 -8 -1 -7 26.44 5.97
 8 -1 7 24.95 5.58
 -8 0 13 -1.69 2.81
 -8 0 13 3.31 2.73
 8 0 -12 14.09 4.94
 -8 0 12 15.39 4.62
 -8 0 12 9.96 3.53
 -8 0 12 19.73 5.08
 8 0 -11 -3.54 3.26
 -8 0 11 1.99 2.53
 8 0 -11 4.18 2.49
 -8 0 11 -4.12 3.19
 8 0 -10 11.41 3.44
 8 0 -10 23.56 5.42
 -8 0 10 15.32 4.67
 -8 0 10 20.27 4.79
 -8 0 9 28.33 5.26
 8 0 -9 17.93 3.98
 8 0 -9 14.88 4.05
 -8 0 9 29.6 5.47
 -8 0 8 12.36 3.83
 8 0 -8 1.16 2.14
 -8 0 8 7.94 3.26
 8 0 -8 8.38 1.77
 8 0 -8 9.66 2.94
 -8 0 7 293.52 16.05
 8 0 -7 300.44 16.92
 8 0 -7 313.1 11.72
 -8 0 7 268.2 15.3
 8 0 -7 327.94 15.79
 -8 0 6 1.54 2.46
 8 0 -6 3.75 1
 8 0 -6 0.61 2.3
 -8 0 6 1.73 2.14
 8 0 -6 4.11 1.67
 -8 0 5 232.57 13.61
 8 0 -5 236.37 14.27
 8 0 -5 253.94 11.39
 -8 0 5 251.08 14.28
 8 0 -5 242.17 8.6
 -8 0 4 235.61 13.77
 8 0 -4 251.31 14.42
 8 0 -4 259.31 11.9
 -8 0 4 224.85 13.55
 8 0 -4 255.43 9.64
 -8 0 3 13.13 3.79
 8 0 -3 14.13 2.57
 8 0 -3 11.82 3.49
 -8 0 3 13.22 3.58
 8 0 -3 13.49 3.09
 -8 0 2 178.01 12.03
 8 0 -2 180.17 12
 8 0 -2 168.08 10.2
 8 0 -2 168.64 9.05
 -8 0 2 165.22 11.74
 -8 0 1 9.08 3.38
 8 0 -1 6.63 2.25
 8 0 -1 8.89 2.93
 -8 0 1 7.35 2.89
 8 0 -1 3.95 2.18
 -8 0 0 1.5 1.47
 8 0 0 2.68 2.38
 -8 0 0 5.55 2.75
 8 0 0 2.1 2.11
 8 0 0 0.38 1.85
 -8 0 -1 10.74 3.39
 8 0 1 7.01 3.18
 8 0 1 8.77 3.02
 8 0 1 8.74 3.06
 8 0 1 8.09 3.02
 -8 0 -1 4.91 2.48
 -8 0 -2 16.44 4.36
 8 0 2 8.97 2.99
 -8 0 -2 11.37 3.89
 8 0 2 10.94 3.09
 -8 0 -3 6.74 3.07
 8 0 3 6.2 2.39
 -8 0 -3 4.9 3.4
 8 0 3 5.8 3.03
 8 0 3 3.57 2.17
 -8 0 -3 6.06 3.14
 -8 0 -4 9.32 3.42
 -8 0 -4 11.66 4.23
 8 0 4 10.15 4.03
 8 0 4 15.5 4.1
 8 0 4 17.32 3.91
 -8 0 -4 16.54 5.04
 -8 0 -5 49.61 7.8
 8 0 5 34.6 6.78
 8 0 5 43.93 6.61
 -8 0 -5 40.91 7.5
 -8 0 -6 47.57 8.04
 8 0 6 39.53 7.49
 -8 0 -6 54.81 8.27
 8 0 6 46.41 7.04
 -8 0 -7 15.2 5.51
 8 0 7 24.23 6.09
 -8 0 -7 28.18 6.31
 8 0 7 31.59 6.38
 8 1 -13 5.58 3.62
 -8 1 13 5.15 3.42
 -8 1 12 97.68 10.82
 8 1 -12 83.09 10.37
 -8 1 12 64.43 7.53
 -8 1 12 56.52 8.57
 8 1 -11 17.18 5.36
 -8 1 11 10.73 4.08
 8 1 -11 13.85 3.71
 -8 1 11 15.25 4.46
 -8 1 10 153.13 12.64
 8 1 -10 157.73 13.4
 8 1 -10 141.23 10.83
 -8 1 10 159.78 12.62
 8 1 -9 46.77 6.19
 8 1 -9 39.53 6.63
 -8 1 9 38.67 6.39
 -8 1 9 50.19 6.91
 -8 1 8 8.36 3.15
 8 1 -8 14.03 3.69
 8 1 -8 9.11 3.67
 -8 1 8 10.18 3.72
 8 1 -8 7.3 1.77
 -8 1 7 62.65 7.42
 8 1 -7 64.32 7.98
 8 1 -7 76.22 5.57
 8 1 -7 74.73 7.57
 -8 1 7 74.43 7.79
 -8 1 6 89.66 8.65
 8 1 -6 79.79 8.43
 8 1 -6 95.53 6.57
 8 1 -6 78.87 7.69
 -8 1 6 80.33 7.95
 -8 1 5 23.07 4.33
 8 1 -5 33.04 5.01
 8 1 -5 29.84 5.31
 -8 1 5 27.18 4.78
 8 1 -5 28 3.75
 -8 1 4 400.86 18.36
 8 1 -4 407.28 19.07
 8 1 -4 369.59 14.81
 8 1 -4 395.56 17.48
 -8 1 4 399.39 17.8
 -8 1 3 160.39 11.44
 8 1 -3 145.24 11.16
 8 1 -3 150.95 9.42
 8 1 -3 169.15 11.12
 -8 1 3 157.91 10.91
 -8 1 2 424.74 19.58
 8 1 -2 454.93 20.26
 8 1 -2 447.23 17.34
 8 1 -2 448.25 18.61
 -8 1 2 450.27 19.15
 -8 1 1 219.98 13.99
 8 1 -1 215.35 13.8
 8 1 -1 240.15 12.77
 8 1 -1 233.29 13.12
 -8 1 1 219.66 13.06
 8 1 0 362.27 19.03
 -8 1 0 325.32 17.61
 8 1 0 294.24 16.76
 8 1 0 333.88 15.65
 8 1 0 318.11 15.59
 -8 1 0 305.91 15.86
 8 1 1 206.29 14.59
 -8 1 -1 215.01 14.69
 8 1 1 198.67 13.89
 8 1 1 200.46 12.37
 8 1 1 221.9 12.92
 -8 1 -1 196.74 12.81
 -8 1 -2 23.03 4.64
 8 1 2 18.81 4.04
 8 1 2 20.5 5.03
 8 1 2 26.95 4.82
 -8 1 -2 25.53 5.43
 -8 1 -3 41.07 6.35
 8 1 3 45.39 5.95
 -8 1 -3 41.5 6.61
 8 1 3 47.33 7.62
 8 1 3 48.26 6.46
 -8 1 -3 56.81 8.37
 8 1 3 33.33 5.14
 -8 1 -4 2.71 2.34
 -8 1 -4 1.1 2.14
 8 1 4 5.74 3.2
 8 1 4 0.09 1.51
 8 1 4 2.48 2.8
 8 1 4 1.33 2.39
 -8 1 -4 0.44 2.81
 -8 1 -5 26.39 5.68
 -8 1 -5 20.54 5.18
 8 1 5 24.52 6.17
 -8 1 -5 39.92 7.05
 8 1 5 25.73 5.44
 -8 1 -5 22.78 5.86
 -8 1 -6 -0.24 2.64
 8 1 6 6.66 3.31
 -8 1 -6 6.49 3.42
 8 1 6 -1.17 2.66
 -8 1 -7 17.52 5.4
 8 2 -13 1.02 2.81
 -8 2 13 -5.14 3.42
 8 2 -12 5.95 3.21
 -8 2 12 9.23 4.19
 8 2 -11 1.63 2.01
 8 2 -11 4.76 3.17
 -8 2 11 5.44 3.18
 -8 2 11 2.6 2.49
 8 2 -10 5.91 2.72
 8 2 -10 5.89 3.38
 -8 2 10 4.23 3.1
 -8 2 10 5.03 3.26
 8 2 -9 11.1 3.54
 8 2 -9 13.52 4.18
 -8 2 9 8.18 3.24
 -8 2 9 9.53 3.36
 -8 2 8 67.89 8
 8 2 -8 62.2 8.19
 8 2 -8 54.93 6.99
 -8 2 8 78.9 8.17
 -8 2 7 251.81 14.99
 8 2 -7 294.84 17.01
 8 2 -7 268.16 11.37
 8 2 -7 255.69 14.91
 -8 2 7 265.85 14.64
 -8 2 6 47.06 6.14
 8 2 -6 41.09 6.37
 8 2 -6 47.63 4.89
 -8 2 6 45.48 6.5
 8 2 -6 55.14 6.93
 -8 2 5 751.01 26.88
 8 2 -5 803.76 28.66
 8 2 -5 830.05 23.41
 8 2 -5 754.59 26.8
 -8 2 5 761.09 25.15
 -8 2 4 118.79 10.04
 8 2 -4 102.47 9.78
 8 2 -4 110.99 8.13
 8 2 -4 114.27 9.75
 -8 2 4 115.01 8.85
 -8 2 3 379.28 18.39
 8 2 -3 420.24 19.78
 8 2 -3 415.23 16.64
 8 2 -3 398.91 18.58
 -8 2 3 398.08 16.94
 8 2 -2 59.26 7.5
 8 2 -2 60.55 6.39
 -8 2 2 58.92 7.25
 -8 2 2 61.82 6.52
 8 2 -2 51.54 6.61
 -8 2 1 6.51 2.33
 8 2 -1 13.28 3.97
 8 2 -1 8.89 3.62
 8 2 -1 6.02 2.72
 -8 2 1 5.8 3.16
 8 2 -1 4.48 2.81
 8 2 0 126.17 11.34
 -8 2 0 118.53 10.84
 8 2 0 119.85 10.93
 8 2 0 122.72 10.05
 8 2 0 115.59 9.37
 -8 2 0 123.96 9.46
 -8 2 -1 17.11 3.85
 8 2 1 11.61 3.7
 8 2 1 7.46 2.95
 8 2 1 7.68 2.84
 -8 2 -1 10.5 3.8
 -8 2 -2 20.41 4.22
 8 2 2 19.34 4.25
 8 2 2 14.51 4.21
 8 2 2 20.08 4.36
 8 2 2 16.8 3.94
 -8 2 -2 12.71 4.54
 -8 2 -3 27.59 5.06
 8 2 3 21.94 4.75
 8 2 3 21.66 4.59
 -8 2 -3 23.29 5
 8 2 3 20.17 5.12
 8 2 3 21.79 4.62
 -8 2 -3 17.88 5.08
 -8 2 -4 21.56 4.59
 8 2 4 21.36 4.5
 8 2 4 14.4 3.96
 -8 2 -4 12.7 3.81
 8 2 4 18.38 4.97
 -8 2 -4 18.95 4.93
 8 2 4 12.15 3.86
 -8 2 -4 21.79 5.48
 -8 2 -5 30.35 5.65
 8 2 5 40.69 6.66
 -8 2 -5 30.12 5.81
 8 2 5 34.44 7.23
 -8 2 -5 44.95 7.76
 8 2 5 32.95 6.11
 -8 2 -5 44.59 8.03
 8 2 6 42.4 7.02
 8 2 6 56 9.44
 -8 2 -6 68.54 9.92
 8 2 6 50.32 7.62
 -8 3 13 0.73 1.78
 8 3 -13 0.66 2.5
 -8 3 13 6.22 3.69
 -8 3 12 4.66 2.94
 8 3 -12 5.95 3.76
 -8 3 12 10.66 4.12
 -8 3 11 6.28 3.19
 -8 3 11 11.28 3.64
 8 3 -11 3.39 3.03
 -8 3 11 14.11 4.13
 8 3 -11 9.18 3.57
 -8 3 10 47.33 6.62
 8 3 -10 23.48 5.7
 -8 3 10 44.17 6.88
 8 3 -10 36.14 6.11
 8 3 -9 16.38 4.53
 -8 3 9 15.75 3.8
 8 3 -9 12.47 4.1
 -8 3 9 18.46 4.72
 -8 3 9 22.63 4.73
 8 3 -8 30.91 5.71
 -8 3 8 34.05 4.96
 8 3 -8 37.84 6.5
 -8 3 8 36.73 6.05
 -8 3 8 45.07 6.2
 -8 3 7 71.41 6.62
 -8 3 7 68.75 7.8
 8 3 -7 70.21 8.48
 8 3 -7 74.07 8.33
 8 3 -7 62.2 5.75
 -8 3 7 63.98 7.02
 8 3 -6 3.24 2.63
 -8 3 6 3.87 1.8
 8 3 -6 6.51 3.19
 -8 3 6 0.86 2.45
 8 3 -6 2.07 1.82
 -8 3 6 6.19 2.69
 8 3 -5 51.61 7.05
 -8 3 5 60.42 7.18
 8 3 -5 42.11 6.47
 8 3 -5 53.1 5.71
 -8 3 5 56.58 6.17
 -8 3 4 19.06 3.48
 8 3 -4 19.3 4.56
 8 3 -4 17.52 4.5
 -8 3 4 18.91 4.28
 8 3 -4 20.1 3.75
 8 3 -3 112.06 10.25
 -8 3 3 120.85 10.36
 8 3 -3 128.26 11.1
 8 3 -3 147.19 11.6
 8 3 -3 127.69 9.46
 -8 3 3 140.07 9.16
 8 3 -2 326.96 17.98
 -8 3 2 306.99 17.07
 8 3 -2 293.21 17.18
 8 3 -2 300.18 16.78
 8 3 -2 311.57 15.47
 -8 3 2 322.64 14.24
 8 3 -1 75.79 8.88
 -8 3 1 88.09 9.3
 8 3 -1 83.66 8.7
 8 3 -1 85.33 9.42
 8 3 -1 84.51 8.14
 -8 3 1 88.3 7.39
 8 3 0 157.37 13.06
 8 3 0 154.12 11.97
 -8 3 0 172.74 13.57
 8 3 0 157.58 12.96
 8 3 0 179.42 12.2
 -8 3 0 166.41 10.31
 8 3 1 91.42 10.21
 8 3 1 87.61 9.03
 -8 3 -1 84.54 9.82
 8 3 1 88.18 10.02
 8 3 1 93.85 9
 -8 3 -1 79.22 7.28
 8 3 2 25.31 5.3
 8 3 2 33.97 6.56
 -8 3 -2 20.35 5.27
 8 3 2 19.64 4.7
 -8 3 -2 22.26 5.59
 8 3 2 22.79 4.92
 8 3 3 29.53 6.06
 8 3 3 34.36 6.93
 -8 3 -3 27.84 6.11
 8 3 3 26 5.2
 -8 3 -3 32.3 6.69
 8 3 3 22.1 4.78
 8 3 4 25.97 5.47
 -8 3 -4 12.46 3.86
 8 3 4 32.66 7.01
 -8 3 -4 25.24 6.11
 8 3 4 25.12 5.22
 8 3 4 25.07 5.19
 -8 3 -4 12.09 4.65
 8 3 5 6.34 3.41
 8 3 5 2.33 2.45
 -8 3 -5 9.08 4.41
 8 3 5 3.18 2.86
 8 3 6 2.17 2.69
 8 4 -13 11.02 3.86
 -8 4 12 7.97 3.83
 -8 4 12 12.54 4.3
 8 4 -12 8.75 3.82
 -8 4 12 8.24 3.97
 -8 4 11 8.46 3.42
 -8 4 11 16.06 4.22
 8 4 -11 11.34 3.62
 8 4 -11 16.45 5.12
 -8 4 11 7.61 3.45
 -8 4 10 16.5 4.23
 -8 4 10 17.66 4.62
 -8 4 10 25.07 5.21
 8 4 -10 16.73 4.64
 -8 4 10 14.28 3.97
 8 4 -10 11.54 3.87
 -8 4 9 9.96 3.34
 -8 4 9 7.54 2.85
 -8 4 9 6.64 3.57
 8 4 -9 7.94 3.9
 -8 4 9 8.37 3.3
 8 4 -9 3.66 3.04
 -8 4 8 56.39 6.63
 -8 4 8 53.66 6.35
 -8 4 8 73.47 8.67
 -8 4 8 67.58 7.98
 8 4 -8 55.79 7.77
 8 4 -8 70.2 8.82
 -8 4 7 90.45 7.87
 -8 4 7 94.71 9.61
 8 4 -7 97.74 10.24
 -8 4 7 111.81 10.11
 8 4 -7 90.02 9.57
 -8 4 7 111.56 9.07
 -8 4 6 35.15 6.13
 8 4 -6 31.09 5.9
 -8 4 6 48.79 6.58
 8 4 -6 31.87 6.03
 -8 4 6 34.57 4.99
 8 4 -5 127.43 10.66
 8 4 -5 105.44 10.66
 -8 4 5 114.35 10.17
 8 4 -5 130.69 11.26
 8 4 -5 128.71 9.64
 -8 4 5 135.6 9.16
 8 4 -4 65.4 7.82
 8 4 -4 59.9 7.88
 8 4 -4 68.93 7.3
 -8 4 4 56.19 7.2
 8 4 -4 64.57 8.24
 -8 4 4 58.32 5.8
 8 4 -3 73.01 8.38
 8 4 -3 57.32 7.76
 8 4 -3 66.95 7.39
 -8 4 3 56.07 7.37
 8 4 -3 49.43 7.28
 8 4 -2 111.84 10.83
 8 4 -2 113.63 10.82
 -8 4 2 104.04 10.19
 8 4 -2 124.59 11.54
 8 4 -2 128.47 10.33
 -8 4 1 38.5 6.44
 8 4 -1 30.09 5.89
 8 4 -1 35.59 6.4
 8 4 -1 25.22 5.24
 -8 4 1 38.19 6.63
 8 4 -1 41.29 6.86
 -8 4 0 37.82 6.37
 8 4 0 36.42 6.63
 -8 4 0 38 6.5
 8 4 0 35.87 6.82
 8 4 0 38.19 6.17
 -8 4 0 52.72 7.78
 8 4 0 35.4 6.43
 -8 4 -1 21.88 4.78
 8 4 1 18.55 5.17
 -8 4 -1 15.18 4.49
 8 4 1 14.06 4.16
 -8 4 -1 19.68 5.33
 8 4 1 21.56 5.25
 8 4 2 14.82 5.02
 -8 4 -2 13.64 4.07
 8 4 2 18.49 5.39
 -8 4 -2 20 5.34
 8 4 2 24.44 5.17
 8 4 2 18.18 4.6
 -8 4 -2 23.2 5.64
 8 4 3 90.66 10.67
 -8 4 -3 93.54 11.17
 8 4 3 87.76 9.61
 -8 4 -3 80.82 9.24
 8 4 3 113.73 12.49
 8 4 3 104.74 10.66
 -8 4 -3 84.74 10.88
 8 4 4 23.51 5.93
 -8 4 -4 25.07 5.33
 8 4 4 14.66 5.46
 8 4 4 15.78 4.45
 -8 4 -4 14.65 5.17
 8 4 4 18.65 4.83
 8 4 5 32.55 7.12
 -8 5 11 12.74 4.57
 8 5 -11 8.63 4.08
 -8 5 10 26.06 5.38
 -8 5 10 23.03 5.65
 8 5 -10 26 6.14
 8 5 -10 16.94 5.11
 -8 5 9 28.24 6.14
 8 5 -9 14.93 5.09
 8 5 -9 18.4 4.82
 -8 5 8 26.33 5.97
 8 5 -8 20.69 5.38
 -8 5 7 58.57 8.2
 8 5 -7 37.26 7
 8 5 -7 59.78 8.09
 -8 5 7 56.65 7.27
 -8 5 6 3.38 2.87
 8 5 -6 0.73 2.4
 8 5 -6 -0.63 3.94
 -8 5 6 2.02 2.46
 -8 5 5 2.81 2.91
 8 5 -5 7.98 3.18
 8 5 -5 8.48 3.6
 8 5 -5 7.84 4.09
 -8 5 5 6.24 3.11
 -8 5 4 80.79 9.57
 8 5 -4 74.58 8.44
 -8 5 4 67.34 8.06
 -8 5 4 61.68 7.31
 8 5 -4 66.81 8.5
 8 5 -4 59.5 8.63
 -8 5 3 27.05 5.75
 8 5 -3 12.26 3.88
 -8 5 3 13.18 3.97
 8 5 -3 27.07 5.64
 8 5 -3 16.47 4.88
 -8 5 3 15.27 4.31
 -8 5 2 70.72 8.34
 8 5 -2 86.6 10.02
 -8 5 2 63.85 8.6
 8 5 -2 60.28 8.14
 -8 5 2 76.45 8.91
 8 5 -2 74.64 9.31
 8 5 -2 74.49 8.59
 -8 5 1 21.18 5.13
 8 5 -1 18.89 5.03
 -8 5 1 22.97 5.28
 8 5 -1 25.43 5.84
 8 5 -1 24.22 5.81
 8 5 -1 12.3 4.13
 -8 5 1 17.74 4.94
 -8 5 0 34.44 6.4
 8 5 0 18.57 5.2
 -8 5 0 27.94 5.88
 8 5 0 24.82 5.5
 8 5 0 20.32 5.15
 -8 5 0 15.48 4.6
 -8 5 -1 21.65 5.4
 8 5 1 14.11 4.95
 8 5 1 19.15 5.05
 -8 5 -1 22.15 5.73
 8 5 1 23.12 5.36
 -8 5 -1 22.26 5.72
 8 5 2 30.33 6.87
 -8 5 -2 42.26 7.24
 8 5 2 45.6 8.3
 8 5 2 33.17 6.33
 -8 5 -2 37.74 7.4
 8 5 2 33.75 6.64
 -8 5 -2 46.75 8.35
 -8 5 -3 18.19 5.06
 8 5 3 30.54 6.58
 8 5 3 27.88 6.69
 -8 5 -3 24.68 6.38
 -8 5 -4 6.06 3.19
 -8 6 7 11.68 4.38
 -8 6 6 4.98 3.18
 -8 6 5 8.86 4.07
 8 6 -5 9.79 4.58
 8 6 -5 5.77 3.04
 -8 6 4 28.01 6.47
 8 6 -4 41.32 7.64
 8 6 -4 30.88 6.15
 -8 6 3 30.03 6.56
 8 6 -3 20.96 5.93
 -8 6 2 44.85 7.69
 8 6 -2 55.81 8.62
 8 6 -2 49.9 7.86
 8 6 -1 -0.48 1.85
 -8 6 1 6.14 3.43
 8 6 0 11.89 4.73
 -8 6 0 15.26 4.63
 8 6 1 4.43 3.36
 -8 6 -1 6.1 3.67
 -8 6 -1 7.74 3.59
 -9 -6 6 28.83 6.35
 9 -6 -6 33.5 7.27
 -9 -6 5 11.47 4.37
 9 -6 -5 16.45 5.55
 -9 -6 4 18.31 5.32
 -9 -6 3 6.06 3.45
 -9 -6 2 5.82 3.33
 -9 -5 10 10.64 3.92
 -9 -5 9 4.42 3.18
 -9 -5 8 17.21 4.89
 9 -5 -8 13.37 4.7
 -9 -5 8 13.14 5.04
 -9 -5 7 32.57 6.33
 9 -5 -7 22.31 5.7
 -9 -5 6 17.68 5.38
 9 -5 -6 26.27 6.06
 -9 -5 5 10.79 4.55
 9 -5 -5 6.48 3.65
 -9 -5 4 -3.3 2.94
 9 -5 -4 0.03 2.47
 -9 -5 3 25.25 6.04
 9 -5 -3 18.32 5.52
 -9 -5 2 36.52 7.25
 9 -5 -2 47.91 8.33
 -9 -5 1 52.28 8.67
 9 -5 -1 68.88 9.61
 -9 -5 0 66.59 9.88
 9 -5 0 70.25 9.81
 -9 -5 0 72.28 10.36
 -9 -4 11 3.52 2.96
 9 -4 -11 2.22 2.63
 -9 -4 11 -3.61 2.82
 -9 -4 10 8.04 3.39
 9 -4 -10 9.43 3.79
 -9 -4 10 9.07 3.86
 -9 -4 10 1.11 2.52
 -9 -4 9 3.93 2.97
 9 -4 -9 8.56 3.52
 -9 -4 9 9.21 3.49
 -9 -4 8 8.17 3.29
 9 -4 -8 10.46 3.91
 9 -4 -8 10.32 3.47
 -9 -4 8 17.34 4.22
 -9 -4 7 31.52 6.2
 9 -4 -7 27.35 5.82
 9 -4 -7 33.25 5.89
 -9 -4 7 27.24 5.27
 -9 -4 6 2.65 2.89
 9 -4 -6 12.4 4.16
 9 -4 -6 5.08 2.87
 -9 -4 6 4.58 2.7
 -9 -4 5 44.22 7.25
 9 -4 -5 47.09 7.08
 -9 -4 5 39.98 5.89
 -9 -4 4 76.8 9.56
 9 -4 -4 67.46 8.54
 -9 -4 4 68.99 7.55
 -9 -4 3 64.24 8.93
 9 -4 -3 58.54 8.16
 -9 -4 3 61.05 7.15
 -9 -4 2 43.15 7.53
 9 -4 -2 55.51 8.13
 -9 -4 1 32.9 6.81
 9 -4 -1 34.21 6.37
 -9 -4 0 28.84 6.44
 9 -4 0 33.85 6.74
 -9 -4 -1 -3.77 3.3
 9 -4 1 5.77 3.57
 -9 -4 -1 -3.91 2.99
 -9 -4 -2 16.15 5.28
 9 -4 2 37.38 7.27
 -9 -4 -2 25.47 6.82
 9 -3 -12 9.45 4.08
 -9 -3 12 9.61 4.04
 -9 -3 12 3.69 3.49
 -9 -3 11 2.46 2.93
 9 -3 -11 0.32 1.73
 -9 -3 11 1.72 2.75
 -9 -3 11 -0.36 3.09
 -9 -3 10 33.4 6.37
 9 -3 -10 40.7 7.17
 -9 -3 10 49.95 7.58
 -9 -3 9 34.56 6.53
 9 -3 -9 34.71 6.49
 -9 -3 9 34.49 6.41
 -9 -3 8 29.54 5.9
 9 -3 -8 34.87 6.25
 -9 -3 8 25.46 5.39
 -9 -3 7 47.71 7.53
 9 -3 -7 48.62 6.43
 9 -3 -7 37.21 6.25
 -9 -3 7 34.78 5.82
 -9 -3 6 20.2 5.03
 9 -3 -6 11.36 3.48
 9 -3 -6 15.2 4
 -9 -3 6 18.37 4.3
 -9 -3 5 53.65 7.76
 9 -3 -5 51.24 6.61
 9 -3 -5 58.01 6.97
 -9 -3 5 56.44 7
 -9 -3 4 1.13 2.55
 9 -3 -4 0.22 1.88
 9 -3 -4 3 1.96
 -9 -3 4 -1.08 1.81
 -9 -3 3 30.82 6.17
 9 -3 -3 30.37 5.19
 9 -3 -3 25.78 4.61
 -9 -3 3 31.05 5.29
 -9 -3 2 20.86 5.19
 9 -3 -2 20.22 4.34
 9 -3 -2 20.57 4.08
 -9 -3 2 19.13 4.25
 -9 -3 1 41.07 7.21
 9 -3 -1 60.3 7.63
 9 -3 -1 51.22 6.29
 -9 -3 1 44.79 6.47
 -9 -3 0 66.46 9.31
 -9 -3 0 65.07 7.82
 9 -3 0 69.52 8.52
 -9 -3 -1 38.4 7.12
 9 -3 1 40.2 6.83
 -9 -3 -1 29.03 5.61
 -9 -3 -2 16.57 5.29
 9 -3 2 15.96 4.79
 -9 -3 -2 11.51 4.42
 9 -3 2 13.12 4.07
 -9 -3 -2 25.27 5.36
 -9 -3 -3 10.66 4.61
 9 -3 3 13.66 4.74
 -9 -3 -3 17.58 5.5
 9 -3 3 17.41 4.74
 -9 -3 -3 10.14 3.9
 -9 -2 13 4.39 3.19
 9 -2 -12 0.74 2.31
 -9 -2 12 2.62 2.94
 -9 -2 12 -2.42 2.5
 -9 -2 12 3.25 3.4
 -9 -2 11 15.5 4.77
 9 -2 -11 32.6 6.65
 -9 -2 11 22.57 5.43
 9 -2 -10 10.89 4.2
 -9 -2 10 11.23 3.75
 -9 -2 9 7.76 3.57
 9 -2 -9 9.53 3.6
 -9 -2 9 6.42 3.53
 -9 -2 8 17.26 4.45
 9 -2 -8 8.5 3.51
 -9 -2 8 11.26 3.66
 -9 -2 7 77.74 8.63
 9 -2 -7 85.46 9.28
 9 -2 -7 71.95 6.67
 -9 -2 7 76.23 8.97
 -9 -2 6 71.94 8.7
 9 -2 -6 68.69 8.03
 -9 -2 6 53.75 7.01
 9 -2 -6 63.26 6.35
 -9 -2 5 84.61 8.7
 9 -2 -5 97.47 9.24
 9 -2 -5 108.73 8.4
 -9 -2 5 80.74 9.28
 -9 -2 4 132.98 10.74
 9 -2 -4 138.22 10.83
 9 -2 -4 138.25 9.72
 -9 -2 4 135.15 12.05
 -9 -2 3 134.81 10.83
 9 -2 -3 133.49 10.49
 9 -2 -3 142.55 10.15
 -9 -2 3 139.93 12.2
 -9 -2 2 51.78 7.47
 9 -2 -2 50.28 6.23
 9 -2 -2 45.66 6.25
 -9 -2 2 51.23 6.81
 -9 -2 1 76.24 9.24
 -9 -2 1 85.16 8.83
 9 -2 -1 74.6 7.96
 9 -2 -1 81.63 8.13
 -9 -2 0 10.02 4.04
 9 -2 0 6.25 2.88
 9 -2 0 5.79 2.62
 -9 -2 0 9.24 3.2
 -9 -2 -1 8.78 3.38
 9 -2 1 6.95 3.07
 9 -2 1 2.63 2.17
 -9 -2 -1 9.8 3.64
 9 -2 2 62.91 8.25
 9 -2 2 55.89 8
 -9 -2 -2 61.15 8.38
 -9 -2 -2 81.23 10.37
 -9 -2 -3 4.65 3.4
 9 -2 3 -2.48 2.46
 -9 -2 -3 6.03 3.69
 9 -2 3 7.41 3.35
 -9 -2 -3 4.38 2.91
 -9 -2 -4 11.12 4.87
 9 -2 4 5.44 3.04
 -9 -2 -4 -1.65 3.06
 9 -2 4 7.11 3.12
 -9 -2 -4 5.84 3.3
 9 -2 5 13.92 4.55
 -9 -1 14 2.37 2.79
 -9 -1 13 2.94 2.83
 -9 -1 13 3.3 3.23
 9 -1 -12 11.83 3.66
 9 -1 -12 6.52 3.76
 -9 -1 12 8.05 3.68
 -9 -1 12 2.54 2.3
 -9 -1 12 16.12 4.5
 9 -1 -11 0.02 1.83
 9 -1 -11 2.46 3.43
 -9 -1 11 2.36 2.73
 -9 -1 11 2.98 2.8
 -9 -1 10 60.3 8.21
 9 -1 -10 77.85 9.75
 -9 -1 10 55.79 8
 -9 -1 9 92.74 10.04
 9 -1 -9 93.39 10.55
 -9 -1 9 85.25 9.55
 -9 -1 8 83.66 9.11
 9 -1 -8 88.75 9.77
 -9 -1 8 80.83 9.15
 -9 -1 7 143.35 11.73
 9 -1 -7 146.3 12.19
 -9 -1 7 159.13 12.4
 -9 -1 6 22.93 5.08
 9 -1 -6 20.82 3.06
 9 -1 -6 13.16 4.03
 -9 -1 6 21.5 4.83
 -9 -1 5 323.66 17.2
 9 -1 -5 321.6 17.44
 9 -1 -5 319.81 12.78
 -9 -1 5 340.49 18.34
 -9 -1 4 22.72 5.03
 9 -1 -4 25.11 3.68
 9 -1 -4 16.27 4.15
 -9 -1 4 22.65 4.56
 -9 -1 3 320.95 17.16
 9 -1 -3 351.39 17.77
 9 -1 -3 308.11 13.83
 -9 -1 3 355.59 19.01
 -9 -1 2 16.08 4.19
 9 -1 -2 21.17 3.85
 9 -1 -2 20.26 4.48
 -9 -1 2 11.72 3.57
 9 -1 -1 9.08 2.74
 9 -1 -1 2.64 2.37
 -9 -1 1 9.3 3.21
 -9 -1 0 100.09 9.97
 9 -1 0 102.87 9.69
 9 -1 0 89.98 8.33
 -9 -1 0 88.85 9.78
 9 -1 1 113.56 11.14
 -9 -1 -1 125 11.56
 9 -1 1 96.62 9.73
 9 -1 1 96.28 9.13
 -9 -1 -1 128.63 12.09
 9 -1 2 80.36 9.63
 -9 -1 -2 113.37 11.45
 9 -1 2 110.29 10.15
 -9 -1 -2 109.47 11.54
 -9 -1 -3 75.33 9.75
 -9 -1 -3 76.43 10.16
 9 -1 3 86.04 10.2
 9 -1 3 63.46 8.12
 -9 -1 -3 61.92 8.98
 9 -1 3 74.54 8
 -9 -1 -4 4.69 3.92
 -9 -1 -4 0.76 3.03
 9 -1 4 12.14 4.03
 9 -1 4 7.86 3.39
 -9 -1 -4 2.21 2.76
 -9 -1 -5 -0.76 3.03
 -9 -1 -5 6.29 4.25
 9 -1 5 -1.86 2.87
 9 -1 5 1.51 2.83
 -9 -1 -5 4.8 3.03
 9 -1 6 3.75 2.81
 -9 -1 -6 3.58 2.89
 9 0 -13 14.57 5.42
 -9 0 13 9.9 4.61
 -9 0 13 3.32 2.69
 -9 0 13 5.59 3.62
 9 0 -12 0.91 1.76
 9 0 -12 -1.21 2.77
 -9 0 12 2.31 3.14
 -9 0 12 -2.16 2.84
 9 0 -11 4.43 3.24
 -9 0 11 7.93 3.55
 9 0 -11 4.46 2.58
 -9 0 11 4.86 3.19
 9 0 -10 80.16 9.87
 -9 0 10 55.69 8.06
 -9 0 10 82.17 9.32
 9 0 -10 67.79 7.76
 -9 0 9 0.71 2.23
 9 0 -9 -0.31 2.54
 -9 0 9 3.85 2.52
 9 0 -9 1.93 2.26
 -9 0 8 89.53 9.53
 9 0 -8 109.46 10.97
 9 0 -8 98.99 6.69
 -9 0 8 117.54 10.72
 9 0 -8 118.05 10.07
 -9 0 7 3.01 2.22
 9 0 -7 2.34 2.48
 9 0 -7 0.67 1.86
 -9 0 7 -2.92 2.39
 9 0 -7 0.53 1.19
 9 0 -6 46.76 6.53
 -9 0 6 62.86 7.58
 9 0 -6 63.96 7.91
 9 0 -6 71.56 6.28
 -9 0 6 69.8 8.06
 -9 0 5 22.55 4.74
 9 0 -5 19.78 4.73
 -9 0 5 24.75 5.09
 9 0 -5 20.88 3.62
 -9 0 4 76.21 8.25
 9 0 -4 77.55 8.44
 9 0 -4 79.65 7.11
 -9 0 4 83.2 8.67
 9 0 -4 75.65 5.58
 -9 0 3 120.02 10.39
 9 0 -3 112.48 10.22
 9 0 -3 132.99 9.43
 -9 0 3 130.58 11.01
 9 0 -3 105.82 7.17
 -9 0 2 176.53 12.86
 9 0 -2 175.28 12.77
 9 0 -2 168.64 11.07
 -9 0 2 157.9 12.32
 9 0 -2 189.7 12.56
 -9 0 1 13.25 3.79
 9 0 -1 16.57 3.97
 9 0 -1 21.26 4.59
 -9 0 1 10.15 4
 9 0 -1 23.8 4.44
 -9 0 0 109.38 10.65
 9 0 0 100.85 10.09
 9 0 0 105.67 9.3
 9 0 0 107.15 9.42
 -9 0 0 103.75 10.26
 -9 0 -1 1.27 2.76
 9 0 1 2.39 2.13
 9 0 1 -1.83 2.42
 9 0 1 -4.19 2.53
 -9 0 -1 5.47 3.59
 9 0 1 0.99 2.08
 9 0 2 84.92 10.11
 -9 0 -2 98.34 10.86
 9 0 2 84.78 8.94
 9 0 2 97.24 9.06
 -9 0 -2 108.15 10.92
 -9 0 -3 1.43 2.52
 -9 0 -3 -0.57 2.85
 9 0 3 -2.83 2.42
 9 0 3 2.98 2.82
 -9 0 -3 4.1 2.63
 9 0 3 -1.23 2.17
 -9 0 -4 0.18 2.78
 -9 0 -4 2.45 3.13
 9 0 4 1.01 2.19
 9 0 4 0.68 2.23
 -9 0 -4 -0.39 1.89
 -9 0 -5 15.64 5.45
 -9 0 -5 14.43 5
 9 0 5 8.63 3.96
 9 0 5 11.1 4.22
 -9 0 -5 6.35 3.47
 -9 0 -6 1.6 3.14
 -9 0 -6 5.31 4.15
 9 0 6 9.17 3.95
 9 1 -13 0.2 2.18
 -9 1 13 7.97 4.18
 9 1 -12 7.77 4.19
 -9 1 12 7.4 3.58
 9 1 -12 13 3.9
 -9 1 12 7.3 3.18
 9 1 -11 11.25 4.45
 -9 1 11 1.11 2.55
 9 1 -11 9.79 3.45
 -9 1 11 -0.28 3.33
 9 1 -10 62.32 7.77
 9 1 -10 60.71 8.9
 -9 1 10 51.07 7.93
 -9 1 10 59.4 7.98
 -9 1 9 97.31 10.19
 9 1 -9 99.26 10.9
 9 1 -9 96.4 9.36
 -9 1 9 90.05 9.61
 -9 1 8 80.25 9.05
 9 1 -8 91.83 10.15
 9 1 -8 104.69 9.69
 -9 1 8 95.68 9.48
 -9 1 7 164.8 12.77
 9 1 -7 169.89 13.37
 9 1 -7 153.99 8.9
 9 1 -7 154.38 11.57
 -9 1 7 156.5 11.84
 -9 1 6 27.31 5.03
 9 1 -6 17.4 4.5
 -9 1 6 20.66 4.73
 9 1 -6 16.43 3.16
 9 1 -6 17.08 4.26
 -9 1 5 297.43 16.95
 9 1 -5 346.29 18.72
 9 1 -5 343.13 14.64
 9 1 -5 343.31 17.4
 -9 1 5 341.08 17.3
 -9 1 4 27.95 5.16
 9 1 -4 19.24 4.33
 9 1 -4 27.2 5.39
 -9 1 4 28.03 5.31
 9 1 -4 27.93 4.38
 -9 1 3 347.19 18.34
 9 1 -3 328.46 18.15
 9 1 -3 343.64 15.65
 9 1 -3 335.82 17.12
 -9 1 3 323 16.94
 -9 1 2 22.41 4.56
 9 1 -2 26.15 5.21
 -9 1 2 25.35 5.24
 9 1 -2 23.55 4.35
 9 1 -2 25.6 4.86
 -9 1 1 10.94 3.46
 9 1 -1 10.24 3.58
 -9 1 1 7.82 3.28
 9 1 -1 16.16 3.77
 9 1 -1 14.09 3.8
 9 1 0 114.1 11.39
 -9 1 0 79.66 9.52
 9 1 0 98.48 10.28
 9 1 0 99.8 9.08
 9 1 0 96.66 9.21
 -9 1 0 105.58 9.9
 9 1 1 139.69 12.93
 -9 1 -1 120.55 11.88
 9 1 1 116.17 11.42
 9 1 1 116.89 10.07
 9 1 1 110.73 9.79
 -9 1 -1 122.34 10.84
 9 1 2 87.53 10.58
 -9 1 -2 98.36 10.99
 9 1 2 94.78 9.36
 9 1 2 101.97 9.56
 -9 1 -2 96.36 9.92
 -9 1 -3 61.5 8.39
 -9 1 -3 84.78 9.88
 9 1 3 62.43 9.16
 9 1 3 75.52 8.57
 -9 1 -3 85.05 10.59
 9 1 3 61.8 7.59
 -9 1 -4 3.65 3.36
 -9 1 -4 6.4 3.93
 9 1 4 5.88 3.62
 9 1 4 4.12 2.58
 -9 1 -4 7.06 3.75
 -9 1 -5 1.58 2.83
 -9 1 -5 -1.24 2.71
 9 1 5 6.21 3.91
 -9 1 -5 -2.23 2.92
 9 1 5 -3.57 3.07
 -9 1 -5 -0.07 2.49
 -9 1 -6 8.49 3.66
 -9 1 -6 5.22 3.7
 -9 2 13 -1.26 2.57
 9 2 -12 -2.53 3.01
 -9 2 12 12.96 4.36
 9 2 -11 26.02 5.33
 9 2 -11 20.42 5.52
 -9 2 11 23.68 5.61
 -9 2 11 30.69 6.15
 9 2 -10 11.3 3.95
 9 2 -10 6.91 3.54
 -9 2 10 8.36 3.75
 -9 2 10 8.99 3.5
 9 2 -9 8.47 3.57
 -9 2 9 7.5 3.65
 9 2 -9 8.75 3.59
 -9 2 9 3.58 2.68
 -9 2 8 16.17 4.36
 9 2 -8 13.17 4.42
 -9 2 8 14.67 4.32
 9 2 -8 15.28 4.29
 -9 2 7 81.91 9
 9 2 -7 74.58 8.94
 9 2 -7 79.92 6.58
 9 2 -7 92.28 9.49
 -9 2 7 90.38 8.83
 -9 2 6 71.95 8.43
 9 2 -6 66.88 8.49
 9 2 -6 61.03 6.03
 -9 2 6 60 7.15
 9 2 -6 61.84 7.91
 -9 2 5 93.13 9.47
 9 2 -5 80.14 9.34
 9 2 -5 76.19 7.08
 9 2 -5 98.45 9.61
 -9 2 5 92.43 8.59
 -9 2 4 133.12 11.38
 9 2 -4 160.55 12.83
 9 2 -4 153.46 10.12
 9 2 -4 133.11 11.14
 -9 2 4 130.17 10.1
 -9 2 3 130.68 11.36
 9 2 -3 144.99 12.22
 9 2 -3 132.96 9.8
 9 2 -3 132.51 11.16
 -9 2 3 133.09 10.21
 -9 2 2 55.87 6.66
 9 2 -2 54.35 7.64
 9 2 -2 69.7 7.35
 -9 2 2 52.84 7.46
 9 2 -2 57.73 7.44
 9 2 -1 73.65 9.15
 -9 2 1 88.3 9.7
 9 2 -1 70.96 8.93
 9 2 -1 68.35 7.53
 9 2 -1 76.33 8.43
 -9 2 1 90.28 8.58
 -9 2 0 5.48 2.89
 9 2 0 8.89 3.92
 9 2 0 4.83 2.81
 9 2 0 9.73 3.4
 9 2 0 8.44 3.35
 -9 2 0 10.61 4.03
 -9 2 -1 8.43 3
 9 2 1 11.07 4.08
 9 2 1 7.35 3.29
 9 2 1 9.27 3.55
 9 2 1 8.23 3.07
 -9 2 -1 5.59 3.56
 -9 2 -2 52.85 7.06
 9 2 2 61.91 8.97
 9 2 2 63.07 7.86
 9 2 2 45.93 6.66
 -9 2 -2 59.4 8.83
 -9 2 -3 -0.87 2.1
 9 2 3 -2.94 2.43
 -9 2 -3 -1.37 2.26
 9 2 3 8.56 3.61
 9 2 3 4.29 3.28
 -9 2 -3 8.84 4.22
 9 2 4 0.78 2.24
 9 2 4 12.07 4.58
 -9 2 -4 4.55 3.15
 9 2 4 6.63 3.65
 -9 2 -4 8.15 4.24
 -9 3 12 17.06 4.83
 9 3 -12 6.13 3.63
 -9 3 12 9.91 4.29
 -9 3 11 2.82 2.26
 9 3 -11 5.65 3.91
 -9 3 11 5.46 3.17
 9 3 -11 -1.69 2.54
 9 3 -10 42.62 6.97
 -9 3 10 45.12 6.47
 9 3 -10 48.1 7.82
 -9 3 10 53.33 7.75
 -9 3 10 42.92 6.72
 9 3 -9 33.99 6.33
 9 3 -9 39.89 7.12
 -9 3 9 52.96 7.67
 -9 3 9 39.48 6.32
 9 3 -8 14.6 4.53
 -9 3 8 33.91 4.98
 9 3 -8 30.86 6.16
 -9 3 8 30.97 6.02
 -9 3 8 37.84 5.96
 9 3 -7 30.19 5.78
 9 3 -7 41.01 7
 -9 3 7 29.61 5.66
 9 3 -7 40.21 4.99
 -9 3 7 36.55 5.68
 -9 3 6 21.41 4.29
 9 3 -6 22.49 5.15
 9 3 -6 16.08 4.61
 -9 3 6 26.34 5.35
 9 3 -6 16.37 3.56
 -9 3 5 52.05 6.2
 9 3 -5 52.55 7.44
 9 3 -5 68.84 8.59
 9 3 -5 55.28 6.29
 -9 3 5 41.14 6.62
 -9 3 4 0.31 1.64
 9 3 -4 -0.64 2.13
 9 3 -4 3.57 2.44
 9 3 -4 0.4 1.75
 -9 3 4 5.58 3.24
 -9 3 3 19.65 4.03
 9 3 -3 30.99 5.91
 9 3 -3 23.46 5.47
 9 3 -3 25.38 5.55
 9 3 -3 24.73 4.75
 -9 3 3 27.28 5.63
 -9 3 2 21.11 3.92
 9 3 -2 9.32 3.83
 9 3 -2 14.04 4.36
 9 3 -2 18.56 4.89
 9 3 -2 18.87 4.44
 -9 3 2 21.78 5.15
 -9 3 1 44.9 5.8
 9 3 -1 62.03 8.07
 9 3 -1 56.34 8.1
 9 3 -1 63.3 8.53
 9 3 -1 44.07 6.51
 -9 3 1 48.92 7.61
 9 3 0 68.98 8.52
 9 3 0 76.62 9.71
 9 3 0 76.8 8.52
 -9 3 0 77.43 9.82
 9 3 1 36.32 6.44
 9 3 1 26.4 5.2
 -9 3 -1 41.42 7.57
 9 3 2 19.63 4.92
 9 3 2 12.23 4.69
 -9 3 -2 12.73 4.9
 9 3 2 28.17 5.56
 -9 3 -2 25.39 6.16
 9 3 3 4.62 3.12
 9 3 3 20.62 5.84
 -9 3 -3 8.85 4.27
 9 3 3 6.55 3.18
 -9 3 -3 14.99 5.31
 9 3 3 3.61 2.81
 9 3 4 11.4 4.05
 9 3 5 -0.72 2.58
 -9 4 12 12.69 4.08
 9 4 -12 12.13 4.67
 -9 4 12 8.79 3.68
 -9 4 11 0.19 2.03
 -9 4 11 -0.33 2.03
 9 4 -11 2.07 2.99
 -9 4 11 1.22 2.44
 9 4 -11 2.22 3.06
 -9 4 10 8.08 3.82
 -9 4 10 2.76 2.84
 9 4 -10 1.19 2.43
 -9 4 10 7.31 3.34
 9 4 -10 7.02 3.63
 -9 4 9 7.57 3.5
 9 4 -9 7.01 3.76
 -9 4 9 14.84 4.63
 9 4 -9 10.71 3.73
 -9 4 8 16.43 4.4
 9 4 -8 9.58 3.75
 -9 4 8 11.16 4.12
 9 4 -8 16.35 4.81
 -9 4 8 17.4 4.15
 9 4 -7 41.06 6.9
 -9 4 7 27.17 5.51
 9 4 -7 21.37 5.42
 -9 4 7 33.76 5.37
 9 4 -6 5.05 3.11
 9 4 -6 8.68 2.87
 -9 4 6 5.56 3.14
 9 4 -6 1.85 2.58
 -9 4 6 10.01 2.94
 9 4 -5 51.16 7.39
 9 4 -5 51.94 7.81
 9 4 -5 40.61 5.84
 -9 4 5 47.52 7.02
 9 4 -5 37.43 6.75
 9 4 -4 81.73 9.97
 9 4 -4 64.31 8.35
 9 4 -4 75.76 9.32
 9 4 -4 91.84 8.77
 -9 4 4 69.26 8.73
 9 4 -3 43.82 7.17
 9 4 -3 56.01 8.22
 9 4 -3 51.26 6.96
 -9 4 3 63.34 8.46
 9 4 -3 53.7 8.1
 9 4 -2 53.91 7.99
 9 4 -2 55.7 8.34
 9 4 -2 49.42 6.87
 -9 4 2 55.21 7.97
 9 4 -2 55.85 8.08
 9 4 -1 19.42 5.28
 9 4 -1 36.38 6.84
 9 4 -1 21.92 5.1
 -9 4 1 25.87 5.91
 9 4 -1 28.02 5.9
 -9 4 0 22.81 5.67
 9 4 0 29.94 6.42
 -9 4 0 35.49 6.87
 9 4 0 34.14 6.93
 9 4 0 44.45 6.95
 -9 4 0 26.79 6.17
 9 4 0 33.06 6.51
 -9 4 -1 -2.41 2.64
 9 4 1 -0.28 2.36
 -9 4 -1 -1.89 3.22
 9 4 1 2.02 2.48
 -9 4 -1 2.57 2.36
 9 4 1 -0.96 2.35
 -9 4 -2 25.54 5.7
 9 4 2 28.18 6.74
 -9 4 -2 32.35 6.98
 9 4 2 17.86 5.18
 9 4 2 35.47 6.61
 -9 4 -2 29.95 6.64
 9 4 3 15.08 5.12
 -9 4 -3 29.18 6.12
 9 4 3 17.21 4.81
 -9 5 10 -0.32 2.23
 9 5 -10 -0.6 2.37
 -9 5 9 12.74 4.51
 9 5 -9 5.84 3.58
 9 5 -9 10.36 4.04
 -9 5 8 10.03 3.95
 9 5 -8 8.23 4.21
 9 5 -8 7.75 3.87
 -9 5 7 29.78 6.14
 9 5 -7 26.3 5.64
 9 5 -7 31.83 6.87
 -9 5 7 25.47 5.44
 -9 5 6 22.64 5.6
 9 5 -6 25.38 5.58
 9 5 -6 11.99 4.64
 -9 5 6 21.23 4.93
 -9 5 5 6 3.99
 9 5 -5 10.04 3.41
 9 5 -5 12.46 4.24
 9 5 -5 11.94 4.57
 -9 5 5 8.92 3.77
 -9 5 4 -1.44 2.64
 9 5 -4 0.5 1.92
 -9 5 4 -0.56 1.72
 9 5 -4 -3.12 3.29
 9 5 -4 -2.25 3.04
 -9 5 4 4.36 2.99
 -9 5 3 40.94 7.26
 9 5 -3 24.77 5.75
 -9 5 3 16.44 4.53
 9 5 -3 17.1 4.92
 9 5 -3 23.66 5.88
 9 5 -3 26.34 5.33
 -9 5 3 29.25 6.14
 -9 5 2 44.91 7.55
 9 5 -2 48.22 7.85
 -9 5 2 40.76 6.78
 9 5 -2 58.92 8.76
 9 5 -2 39.62 7.58
 9 5 -2 46.3 7.14
 -9 5 2 47.99 7.99
 -9 5 1 61.93 8.98
 9 5 -1 62.76 9.24
 -9 5 1 64.52 8.98
 9 5 -1 80.89 10.36
 9 5 -1 67.29 9.62
 9 5 -1 43.77 7.16
 -9 5 1 63.3 9.07
 -9 5 0 73.25 9.81
 9 5 0 72.95 10.04
 -9 5 0 84.15 10.54
 9 5 0 74.12 9.85
 9 5 0 71.14 9.18
 -9 5 0 64.9 9.52
 -9 5 -1 45.72 7.82
 9 5 1 48.91 8.53
 9 5 1 39.05 7.48
 -9 5 -1 51.05 8.75
 -9 5 -1 44.08 8.52
 9 6 -6 32.67 6.42
 9 6 -5 23.02 5.58
 9 6 -4 13.42 4.6
 9 6 -3 18.78 5.58
 9 6 -2 -4.46 3.32
 9 6 -1 29.61 6.4
 -9 6 1 26.8 6.08
 -10 -5 8 6.78 3.91
 -10 -5 7 9.95 4.62
 10 -5 -7 12.31 4.88
 -10 -5 6 7.56 3.74
 10 -5 -6 0.57 2.88
 -10 -5 5 7.71 4.07
 10 -5 -5 12.79 4.46
 -10 -5 4 0.88 2.77
 10 -5 -4 -2.7 3
 -10 -5 3 20.06 5.91
 10 -5 -3 19.09 5.51
 10 -5 -2 12.29 5.07
 10 -4 -11 0.55 2.57
 -10 -4 10 19.21 5.45
 10 -4 -10 20.36 5.3
 -10 -4 10 23.82 5.39
 -10 -4 9 -0.82 2.46
 10 -4 -9 2.17 2.38
 -10 -4 9 -0.3 2.24
 -10 -4 8 15.66 5.15
 10 -4 -8 28.59 5.89
 -10 -4 8 33.26 6.2
 -10 -4 7 13.61 4.38
 -10 -4 7 18.17 4.69
 -10 -4 6 23.81 6.05
 10 -4 -6 33.79 6.34
 -10 -4 6 23.39 5.26
 -10 -4 5 48.48 7.99
 10 -4 -5 41.24 6.77
 -10 -4 5 47 6.83
 10 -4 -4 -3.7 3.15
 -10 -4 4 0.69 1.73
 -10 -4 3 4.66 3.47
 10 -4 -3 9.63 3.81
 -10 -4 2 38.99 7.66
 10 -4 -2 33.44 6.65
 -10 -4 1 8.91 4.84
 10 -4 -1 13.25 4.78
 10 -4 0 9.48 3.46
 -10 -3 11 10.74 4.16
 -10 -3 11 18.44 5.37
 -10 -3 10 11.97 4.65
 10 -3 -10 13.79 4.67
 -10 -3 10 17.89 4.98
 -10 -3 9 11.39 4.38
 10 -3 -9 8.05 3.63
 -10 -3 9 16.13 4.78
 -10 -3 8 21.71 5.47
 10 -3 -8 17.42 4.77
 -10 -3 8 27.79 5.55
 -10 -3 7 16.32 5.09
 10 -3 -7 18.24 4.8
 -10 -3 7 17.4 4.51
 -10 -3 6 32.59 6.49
 10 -3 -6 41.22 6.07
 10 -3 -6 50.09 7.17
 -10 -3 6 39.25 6.55
 -10 -3 5 11.03 4
 10 -3 -5 7.79 3.26
 10 -3 -5 7.91 2.94
 -10 -3 5 8.58 3.28
 -10 -3 4 26.9 5.91
 10 -3 -4 24.36 4.96
 10 -3 -4 27.43 5.05
 -10 -3 4 16.3 4.18
 -10 -3 3 69.01 9.61
 -10 -3 3 86.38 9.27
 10 -3 -3 77.71 8.23
 10 -3 -3 74.13 8.42
 -10 -3 2 8.49 4.28
 10 -3 -2 8.58 3.3
 10 -3 -2 5.79 2.85
 -10 -3 2 8.45 3.39
 -10 -3 1 31.89 6.78
 10 -3 -1 47.51 7.13
 -10 -3 1 55.69 7.8
 -10 -3 0 36.17 7.24
 -10 -3 0 36.37 6.52
 -10 -3 -1 6.49 3.91
 10 -3 1 10.32 4.03
 10 -3 1 11.05 3.86
 -10 -3 -1 13.43 4.17
 10 -3 2 53.45 8.47
 10 -3 2 40.63 7.21
 -10 -2 12 -4.46 3.29
 -10 -2 11 2.02 2.88
 10 -2 -11 2.19 2.39
 -10 -2 11 1.08 1.96
 -10 -2 10 3.75 3.04
 10 -2 -10 8.65 3.94
 -10 -2 10 7.48 3.53
 -10 -2 9 7.2 4.13
 10 -2 -9 4.34 3.02
 -10 -2 9 6.54 3.34
 -10 -2 8 28.22 5.97
 10 -2 -8 35.09 6.43
 -10 -2 8 44.78 7.07
 -10 -2 7 6.12 3.24
 10 -2 -7 5.73 2.93
 -10 -2 7 5.3 2.77
 -10 -2 6 22.89 5.26
 10 -2 -6 19 4.84
 -10 -2 6 29.86 5.66
 -10 -2 5 171.69 13.11
 10 -2 -5 150.35 12.28
 10 -2 -5 166.61 10.75
 -10 -2 5 150.47 13.29
 -10 -2 4 79.99 8.85
 10 -2 -4 75.32 8.59
 10 -2 -4 86.51 7.97
 -10 -2 4 75.16 9.66
 -10 -2 3 54.14 8.3
 10 -2 -3 58.92 6.81
 10 -2 -3 63.79 7.78
 -10 -2 3 59.06 7.8
 -10 -2 2 139.06 11.98
 10 -2 -2 147.58 11.79
 10 -2 -2 159.41 11.67
 -10 -2 2 147.28 13.43
 -10 -2 1 23.64 5.42
 10 -2 -1 12.28 3.61
 10 -2 -1 12.17 3.73
 -10 -2 1 14.72 4.32
 -10 -2 0 38.01 7.32
 10 -2 0 40.16 6.38
 10 -2 0 37.7 6.24
 -10 -2 0 49.66 7.75
 -10 -2 -1 7.02 3.82
 10 -2 1 5.38 3.31
 10 -2 1 7.53 3.35
 -10 -2 -1 11.51 4.1
 -10 -2 -2 19.59 5.86
 10 -2 2 12.5 4.49
 -10 -2 -2 20.66 6.35
 10 -2 2 24.49 5.69
 -10 -2 -2 13.18 4.56
 10 -2 3 5.55 3.61
 10 -2 3 3.9 2.78
 -10 -2 -3 7.55 3.83
 10 -2 4 16.28 4.98
 -10 -2 -4 13.35 5.06
 -10 -1 13 14.06 4.93
 10 -1 -12 15.4 5.17
 -10 -1 12 10.71 4.43
 10 -1 -12 6.63 3.23
 -10 -1 12 7.16 3.81
 -10 -1 11 -1.24 2.89
 10 -1 -11 -4.51 3
 10 -1 -11 -0.41 2.52
 -10 -1 11 3.12 2.46
 -10 -1 10 40.69 7.27
 10 -1 -10 40.18 7.23
 -10 -1 10 38.48 6.93
 -10 -1 9 41.69 7.3
 10 -1 -9 46.79 7.89
 -10 -1 9 46.03 7.49
 -10 -1 8 193.93 14.67
 10 -1 -8 183.04 14.67
 -10 -1 8 193.76 14.74
 -10 -1 7 64.92 8.63
 10 -1 -7 62.23 8.41
 -10 -1 7 49.13 7.45
 -10 -1 6 212.09 14.76
 10 -1 -6 210.07 15.06
 -10 -1 6 207.13 15.03
 -10 -1 5 5.26 2.96
 10 -1 -5 0.25 2.06
 -10 -1 5 -0.36 2.61
 -10 -1 4 10.12 3.77
 10 -1 -4 6.5 2.4
 10 -1 -4 11.49 3.99
 -10 -1 4 12.89 3.8
 -10 -1 3 132.31 11.57
 10 -1 -3 104.46 10.23
 10 -1 -3 124.35 9.04
 -10 -1 3 130.57 12.22
 -10 -1 2 4.48 3.49
 10 -1 -2 6.61 2.54
 10 -1 -2 0.32 1.85
 -10 -1 2 3.53 3.21
 -10 -1 1 26.28 6
 10 -1 -1 23.25 4.64
 10 -1 -1 24.18 5.16
 -10 -1 1 29.14 5.91
 -10 -1 0 13.44 4.78
 10 -1 0 16.22 4.12
 10 -1 0 8.67 3.57
 -10 -1 0 10.41 3.92
 10 -1 0 17.4 4.23
 -10 -1 -1 7.71 3.79
 10 -1 1 6.32 3.51
 10 -1 1 9.9 3.48
 10 -1 1 8.08 3.12
 -10 -1 -1 5.55 3.25
 -10 -1 -2 1.07 3.78
 10 -1 2 -2.23 2.45
 10 -1 2 1.76 2.32
 10 -1 2 0.24 2.55
 -10 -1 -2 1.99 2.36
 10 -1 3 68.41 8.4
 -10 -1 -3 63.82 9.6
 -10 -1 -3 67.25 10.32
 10 -1 3 57.28 8.95
 10 -1 3 71.03 9.18
 -10 -1 -3 56.19 9.09
 10 -1 4 -3.34 2.86
 -10 -1 -4 -1.85 3.28
 -10 0 13 45.13 7.34
 10 0 -12 1.49 2.5
 10 0 -12 3.91 3.4
 -10 0 12 2.5 3.01
 -10 0 12 2.99 2.86
 10 0 -11 15.33 5.19
 -10 0 11 21.76 5.73
 10 0 -11 9.64 3.73
 -10 0 11 19.69 5.48
 -10 0 10 89.01 10.47
 10 0 -10 80.94 10.41
 10 0 -10 87.41 9.37
 -10 0 10 113.76 11.52
 -10 0 9 1.02 2.6
 10 0 -9 1.22 2.95
 -10 0 9 0.24 2.21
 10 0 -9 1.21 2.58
 -10 0 8 206.78 15.14
 10 0 -8 214.59 15.99
 -10 0 8 226.87 15.74
 10 0 -8 252.75 15.78
 -10 0 7 70.99 8.73
 10 0 -7 61 8.51
 10 0 -7 61.64 6.19
 -10 0 7 74.44 8.91
 10 0 -7 73.45 8.61
 -10 0 6 2.82 2.79
 10 0 -6 0.57 2.03
 -10 0 6 -2.72 2.77
 10 0 -6 0.23 1.94
 10 0 -6 7.38 3.17
 -10 0 5 123.95 11.34
 10 0 -5 147.21 12.53
 10 0 -5 128.02 9.42
 -10 0 5 137.35 11.93
 10 0 -5 126.84 10.99
 10 0 -4 78.14 9.11
 10 0 -4 75.78 7.53
 -10 0 4 55.45 7.65
 -10 0 4 70.69 8.69
 10 0 -4 82.01 8.8
 -10 0 3 159 12.93
 10 0 -3 163.04 13.08
 10 0 -3 139.98 10.59
 -10 0 3 150.55 12.71
 10 0 -3 155.08 12.19
 -10 0 2 144.39 12.58
 10 0 -2 128.61 11.69
 10 0 -2 149.09 11.16
 -10 0 2 154.99 13.01
 10 0 -2 156.45 12.26
 -10 0 1 32.07 6.19
 10 0 -1 25.4 5.32
 10 0 -1 20.57 4.99
 -10 0 1 22.38 5.63
 10 0 -1 32 5.48
 -10 0 0 70.5 8.99
 10 0 0 93.19 10.89
 -10 0 0 91.73 10.46
 10 0 0 85.49 9.85
 10 0 0 85.82 9
 10 0 0 87.57 9.22
 10 0 1 9.72 3.33
 10 0 1 18.15 5.32
 10 0 1 13.99 4.4
 10 0 1 10.17 3.88
 -10 0 -1 19.32 5.62
 -10 0 -2 52.02 8.24
 10 0 2 47.34 8.16
 10 0 2 44.12 7.07
 -10 0 -2 42.28 7.93
 10 0 2 44.35 6.65
 -10 0 -3 19.71 5.75
 -10 0 -3 14.09 5.47
 10 0 3 18.73 5.45
 10 0 3 17.26 4.34
 10 0 3 23.24 5.65
 -10 0 -3 21.67 5.92
 -10 0 -4 85.42 11.17
 -10 0 -4 70.62 10.18
 10 0 4 74.98 10.73
 10 1 -12 9.87 4.63
 -10 1 12 7.36 3.69
 10 1 -12 8.38 3.86
 -10 1 12 11.86 4.53
 10 1 -11 0.49 2.56
 10 1 -11 -1.07 1.95
 -10 1 11 -2.65 2.7
 -10 1 11 2.23 2.87
 10 1 -10 31.35 5.89
 10 1 -10 42.3 7.83
 -10 1 10 39.97 7
 -10 1 10 37.81 6.87
 -10 1 9 48.8 7.59
 10 1 -9 41.01 6.85
 10 1 -9 48.21 7.97
 -10 1 9 35.55 6.68
 -10 1 8 190.19 14.55
 10 1 -8 199.55 15.61
 10 1 -8 178.35 13.5
 -10 1 8 190.36 14.04
 -10 1 7 49.97 7.6
 10 1 -7 69.67 9.11
 10 1 -7 57.32 5.92
 -10 1 7 43.39 6.94
 10 1 -7 49.34 7.21
 -10 1 6 194.9 14.51
 10 1 -6 210.73 15.56
 10 1 -6 214.83 11.99
 10 1 -6 230.44 15.04
 -10 1 6 207.54 14.27
 -10 1 5 -1.42 2.75
 10 1 -5 2.46 2.52
 10 1 -5 1.31 1.89
 10 1 -5 1.36 1.93
 -10 1 4 7.53 3.17
 10 1 -4 12.36 4.15
 -10 1 4 9.52 3.48
 10 1 -4 13.14 3.42
 10 1 -4 9.93 3.33
 -10 1 3 124.29 11.58
 10 1 -3 103.24 10.7
 10 1 -3 122.57 9.78
 10 1 -3 123.41 10.93
 -10 1 3 106.27 10.31
 -10 1 2 2.58 2.59
 10 1 -2 2.9 2.69
 10 1 -2 3.81 2.5
 -10 1 2 8.8 3.91
 10 1 -2 8.32 3.2
 -10 1 1 24.34 5.34
 10 1 -1 22.4 5.77
 10 1 -1 15.8 4.59
 10 1 -1 27.26 6
 10 1 -1 28.99 5.37
 -10 1 1 27.04 5.75
 -10 1 0 20.19 5.05
 10 1 0 9.85 3.97
 10 1 0 13.79 4.76
 10 1 0 17.54 4.79
 10 1 0 16.93 4.42
 -10 1 0 14.3 4.66
 -10 1 -1 10.04 3.75
 10 1 1 12.15 3.84
 10 1 1 6.56 3.49
 10 1 1 13.19 4.36
 10 1 1 10.04 3.84
 -10 1 -1 12.8 4.64
 10 1 2 -0.29 2.23
 -10 1 -2 -2.03 2.35
 10 1 2 -3.63 3.52
 10 1 2 0.42 2.81
 -10 1 -2 1.58 2.01
 -10 1 -3 55 8.35
 -10 1 -3 56.58 8.81
 10 1 3 69.37 10.17
 10 1 3 64.71 8.48
 -10 1 -3 47.47 8.73
 10 1 3 63.7 8.16
 -10 1 -4 -5.87 3.56
 -10 1 -4 -1.72 3.25
 -10 1 -5 47.1 8.58
 -10 1 -5 32.26 7.16
 10 2 -12 -1.28 2.33
 -10 2 12 -1.7 2.71
 10 2 -11 6.85 3.41
 10 2 -11 5.85 3.39
 -10 2 11 7.89 3.79
 -10 2 11 1.16 2.66
 10 2 -10 11.27 3.62
 10 2 -10 8.75 4.33
 -10 2 10 12.27 4.48
 -10 2 10 4.18 3.07
 10 2 -9 10.23 4.28
 -10 2 9 6.97 3.19
 10 2 -9 8.05 3.47
 -10 2 9 5.79 3.16
 -10 2 8 39.79 6.39
 10 2 -8 35.09 6.98
 -10 2 8 31.57 6.16
 10 2 -8 32.22 6.22
 -10 2 7 12.61 4
 10 2 -7 8.55 3.94
 -10 2 7 11.16 4.24
 10 2 -7 10.14 2.84
 10 2 -7 8.69 3.58
 -10 2 6 22.44 4.86
 10 2 -6 31.82 6.56
 -10 2 6 27.56 5.79
 10 2 -6 26.77 4.43
 10 2 -6 21.56 5.31
 -10 2 5 152.18 12.89
 10 2 -5 159.2 13.61
 10 2 -5 161.51 10.97
 10 2 -5 151.82 12.8
 -10 2 5 141.5 11.37
 -10 2 4 78.94 9.43
 10 2 -4 77.61 9.49
 10 2 -4 63.19 7.1
 10 2 -4 76.06 9.03
 -10 2 4 69.76 7.98
 -10 2 3 47.34 6.69
 -10 2 3 74.95 9.36
 10 2 -3 51.27 7.94
 10 2 -3 49.93 6.52
 10 2 -3 50.76 7.55
 10 2 -2 146.76 13.68
 -10 2 2 168.75 14.07
 10 2 -2 164.69 14
 10 2 -2 161.68 11.94
 10 2 -2 146.31 12.52
 -10 2 2 153.34 11.88
 -10 2 1 16.72 4.21
 10 2 -1 30.24 6.6
 10 2 -1 16.09 4.8
 10 2 -1 21.79 5.05
 -10 2 1 21.74 5.46
 10 2 -1 14.34 4.37
 -10 2 0 40.43 6.49
 10 2 0 35.12 7.13
 10 2 0 43.51 7.6
 10 2 0 40.37 6.87
 10 2 0 50.87 7.15
 -10 2 0 43.12 7.65
 -10 2 -1 6.69 3.05
 10 2 1 0.01 2.09
 10 2 1 0.49 2.79
 10 2 1 5.55 3.62
 10 2 1 6.03 2.99
 -10 2 -1 4.05 3.45
 -10 2 -2 16.25 4.46
 10 2 2 24.7 6.46
 10 2 2 27.89 5.67
 10 2 2 16.71 4.77
 -10 2 -2 11.83 4.69
 10 2 3 7.69 3.41
 10 3 -12 5.78 3.48
 10 3 -11 18.96 5.17
 10 3 -11 36.32 7.39
 -10 3 11 23.9 6.16
 -10 3 11 20.72 5.29
 10 3 -10 17.05 5.14
 10 3 -10 19.84 5.66
 -10 3 10 18.51 5
 -10 3 10 19.48 5.04
 10 3 -9 11.79 4.28
 10 3 -9 15.57 4.97
 -10 3 9 9.51 3.81
 -10 3 9 15.36 4.07
 10 3 -8 26.66 5.81
 10 3 -8 29.61 6.36
 -10 3 8 26.36 5.84
 -10 3 8 25.21 4.91
 -10 3 7 16.01 4.04
 10 3 -7 22.86 5.62
 10 3 -7 24.32 5.71
 -10 3 7 24.19 5.35
 -10 3 6 49.16 6.54
 10 3 -6 36.39 6.8
 10 3 -6 50.84 7.89
 -10 3 6 43.78 7.18
 10 3 -6 34.04 5.2
 -10 3 5 5.99 2.56
 10 3 -5 6.86 3.62
 10 3 -5 2.1 2.73
 -10 3 5 3.97 2.66
 10 3 -5 5.5 2.47
 -10 3 4 9.91 3.36
 10 3 -4 22.65 5.52
 10 3 -4 24.7 5.66
 10 3 -4 20.12 4.36
 -10 3 4 23.97 5.34
 10 3 -3 63.55 8.69
 10 3 -3 61.75 8.98
 10 3 -3 67.11 9.32
 10 3 -3 58.63 7.42
 -10 3 3 61.49 8.58
 -10 3 3 67.78 7.43
 -10 3 2 5.77 2.49
 10 3 -2 6.1 3.71
 10 3 -2 3.13 2.73
 10 3 -2 9.83 4.38
 10 3 -2 5.33 3.04
 -10 3 2 2.16 2.89
 10 3 -1 50.42 7.84
 10 3 -1 57.67 8.88
 10 3 -1 52.11 8.46
 10 3 -1 47.02 6.95
 -10 3 1 40.75 7.41
 10 3 0 35.84 6.58
 10 3 0 42.53 7.9
 10 3 0 44.18 8.01
 10 3 0 37.41 6.35
 -10 3 0 52.95 8.63
 10 3 1 9.66 3.84
 10 3 1 7.28 3.73
 10 3 1 7.31 3.29
 -10 3 -1 7.36 4.13
 10 3 2 46.27 7.52
 10 3 3 29.18 6.19
 -10 4 11 4.47 2.85
 -10 4 11 4.44 3.4
 10 4 -11 1.76 3.28
 -10 4 10 23.16 5.58
 10 4 -10 27.67 6.39
 -10 4 10 26.75 6.22
 10 4 -10 27.86 6.54
 -10 4 9 -0.28 2.17
 10 4 -9 3.13 2.92
 -10 4 9 8.34 3.62
 10 4 -9 3.67 3.51
 -10 4 9 1.57 2.49
 10 4 -8 30.95 6.66
 -10 4 8 38.55 6.9
 10 4 -8 36.79 7.36
 -10 4 8 32.02 5.68
 10 4 -7 32.24 6.8
 -10 4 7 18.32 5.23
 10 4 -7 26.6 6.34
 10 4 -6 21.45 5.36
 10 4 -6 29.98 6.29
 10 4 -6 22.23 4.7
 -10 4 6 25.59 5.9
 10 4 -6 23.75 5.75
 10 4 -5 57.78 8.43
 10 4 -5 47.26 7.95
 10 4 -5 41.37 6.28
 -10 4 5 55.99 8.28
 10 4 -5 50.86 8.21
 10 4 -4 -0.68 2.03
 10 4 -4 2.26 3.02
 10 4 -4 1.16 2.23
 -10 4 4 0.23 2.33
 10 4 -4 4.47 3.53
 10 4 -3 7.33 3.47
 10 4 -3 0.9 2.68
 10 4 -3 4.06 2.24
 -10 4 3 6.83 3.64
 10 4 -3 2.76 2.27
 10 4 -2 34.75 7.1
 10 4 -2 41.36 7.79
 10 4 -2 38.33 6.45
 -10 4 2 51.74 8.58
 10 4 -2 39.66 7.36
 10 4 -1 6.96 3.45
 10 4 -1 21.95 5.91
 10 4 -1 14.94 4.27
 -10 4 1 10.77 4.62
 10 4 -1 11.52 4.64
 -10 4 0 8.62 3.83
 10 4 0 9.05 4.77
 -10 4 0 6.49 4.08
 -10 4 0 10.71 4.87
 10 4 0 3.01 2.71
 -10 4 -1 11.16 3.92
 10 4 1 17.04 5.07
 10 4 2 3 3.05
 10 5 -8 3.85 3.14
 10 5 -7 17.47 4.93
 -10 5 7 7.83 3.79
 10 5 -6 -3.57 2.91
 -10 5 6 1.39 2.66
 10 5 -5 29 6.31
 10 5 -5 15.9 5.08
 -10 5 5 15.51 4.75
 10 5 -4 0.05 2.2
 -10 5 4 -1.55 2.67
 10 5 -4 1.49 3.2
 10 5 -4 -3.68 3.05
 -10 5 4 2.11 2.76
 10 5 -3 11.82 4.51
 -10 5 3 10.49 4.34
 10 5 -3 16.92 5.43
 10 5 -3 13.37 4.42
 -10 5 3 23.51 5.83
 10 5 -2 16.23 5.27
 -10 5 2 18.63 5.58
 -10 5 2 16.02 5.09
 10 5 -1 2.19 3.53
 -10 5 1 1.44 3.05
 -10 5 1 5.99 4.11
 11 -5 -5 0.37 3.21
 -11 -4 9 9.14 4.05
 -11 -4 8 19.49 5.16
 -11 -4 7 28.99 6.03
 11 -4 -4 2.52 2.94
 11 -4 -3 25.59 5.78
 11 -4 -2 23.92 6.02
 11 -4 -1 -0.75 3.09
 11 -3 -10 34.93 7.05
 -11 -3 10 25.92 6.02
 11 -3 -9 0.94 2.38
 -11 -3 9 -1.99 2.82
 -11 -3 8 21.1 5.87
 11 -3 -8 28.28 6.23
 -11 -3 8 13.47 4.36
 -11 -3 7 26.92 6.62
 11 -3 -7 30.87 6.24
 -11 -3 7 29.25 5.85
 -11 -3 6 30.78 6.69
 11 -3 -6 31.54 6.01
 -11 -3 6 29.08 6.05
 -11 -3 5 5.02 3.67
 11 -3 -5 13.57 4.16
 -11 -3 5 10.99 3.75
 -11 -3 4 64.27 9.83
 11 -3 -4 58.56 7.88
 -11 -3 4 63.47 8.55
 11 -3 -4 89.29 9.36
 -11 -3 3 17.09 5.36
 11 -3 -3 20.81 4.85
 -11 -3 3 18.11 4.88
 -11 -3 2 20.6 5.95
 11 -3 -2 23.74 5.2
 -11 -3 2 20.47 5.1
 11 -3 -1 43.45 7.17
 -11 -3 1 38.32 6.76
 11 -3 0 -1.41 2.56
 -11 -3 0 3.16 2.73
 11 -3 1 0.88 2.52
 -11 -2 10 2.28 2.99
 11 -2 -10 3.03 3.14
 -11 -2 10 5.3 3.35
 -11 -2 9 3.35 2.71
 11 -2 -9 1.37 2.1
 -11 -2 9 1.73 2.29
 -11 -2 8 33.23 7.06
 11 -2 -8 33.87 6.84
 -11 -2 8 26.58 6.02
 -11 -2 7 4.53 3.63
 11 -2 -7 2.52 2.33
 -11 -2 7 4.53 3.09
 -11 -2 6 39.77 7.21
 11 -2 -6 48.15 7.48
 -11 -2 6 48.64 7.46
 -11 -2 5 18.04 5.17
 11 -2 -5 33.78 6.28
 -11 -2 5 34.41 6.29
 -11 -2 4 14.57 5.07
 11 -2 -4 11.25 3.8
 -11 -2 4 13.45 4.59
 -11 -2 3 53.34 8.65
 11 -2 -3 48.59 6.59
 11 -2 -3 64.51 8.31
 -11 -2 3 54.44 8.03
 -11 -2 2 27.52 6.51
 11 -2 -2 24.41 4.92
 11 -2 -2 30.51 5.7
 -11 -2 2 27.74 5.96
 -11 -2 1 3.71 3.2
 11 -2 -1 1.17 2.04
 11 -2 -1 2.37 1.92
 -11 -2 1 -1.17 2.24
 -11 -2 0 23.78 6.21
 11 -2 0 15.72 4.71
 11 -2 0 27.67 5.7
 -11 -2 0 12.2 4.62
 11 -2 1 12.48 4.24
 11 -2 1 6.73 3.39
 -11 -2 -1 7.94 3.63
 11 -2 2 5.08 3.79
 -11 -2 -2 9.11 4.51
 11 -1 -12 -1.7 2.61
 11 -1 -11 6.3 3.07
 11 -1 -11 2.68 1.68
 -11 -1 10 4.09 3.41
 11 -1 -10 7.9 3.43
 11 -1 -10 18.67 5.34
 -11 -1 10 9.29 4.07
 -11 -1 9 9.58 4.33
 11 -1 -9 11.04 4.03
 -11 -1 9 16.24 4.65
 -11 -1 8 18.66 5.52
 11 -1 -8 18.76 5.25
 -11 -1 8 19.4 5.15
 -11 -1 7 50.33 8.06
 11 -1 -7 46.78 7.81
 -11 -1 7 51.31 7.8
 11 -1 -7 45.14 5.83
 -11 -1 6 7.13 3.78
 11 -1 -6 10.16 3.97
 -11 -1 6 2.51 2.6
 11 -1 -6 2.58 1.87
 -11 -1 5 50.77 8.03
 11 -1 -5 43.93 7.26
 -11 -1 5 35.48 6.39
 11 -1 -5 43.07 6.07
 -11 -1 4 25.37 6.13
 11 -1 -4 16.48 4.54
 -11 -1 4 21.56 5.37
 11 -1 -4 28.48 5.08
 -11 -1 3 64.08 9.16
 11 -1 -3 36.1 6.73
 -11 -1 3 45.18 7.51
 11 -1 -3 53.39 7.23
 -11 -1 2 2.93 3.55
 11 -1 -2 5.12 2.51
 11 -1 -2 10.84 3.93
 -11 -1 2 9.87 3.79
 11 -1 -2 5.66 2.89
 -11 -1 1 146.93 13.58
 11 -1 -1 160.26 13.71
 11 -1 -1 142.96 12.29
 -11 -1 1 153.7 14.38
 -11 -1 0 11.49 4.69
 11 -1 0 8.22 3.85
 11 -1 0 13.7 4.28
 11 -1 0 10.55 4.13
 11 -1 0 21.32 5.25
 -11 -1 0 12.99 4.22
 -11 -1 -1 -0.72 3.65
 11 -1 1 3.18 2.35
 11 -1 1 2.19 2.67
 -11 -1 -1 -3.46 3.01
 11 -1 2 6.43 3.53
 -11 -1 -2 1.47 2.47
 11 -1 2 1.24 2.33
 11 0 -12 -3.05 3.14
 11 0 -11 15.42 5.01
 11 0 -11 10.75 4.34
 -11 0 10 12.19 4.48
 11 0 -10 8.26 3.44
 11 0 -10 8.22 3.87
 -11 0 10 6.72 3.15
 -11 0 9 9.59 3.92
 11 0 -9 15.4 4.57
 11 0 -9 13.51 4.51
 -11 0 9 7.56 3.76
 -11 0 8 22.35 5.44
 -11 0 8 18.89 5.17
 11 0 -8 19.97 5.37
 -11 0 7 7.15 3.96
 11 0 -7 18.42 5.13
 -11 0 7 5.34 3.09
 11 0 -7 16.45 3.62
 11 0 -7 19.34 4.89
 -11 0 6 159.58 13.66
 11 0 -6 148.05 13.54
 11 0 -6 149.54 10.71
 -11 0 6 143.18 12.91
 11 0 -6 155.3 13.05
 -11 0 5 22.54 5.35
 11 0 -5 17.8 4.99
 11 0 -5 26.56 5.48
 -11 0 5 24.82 5.5
 11 0 -5 22.89 4.52
 -11 0 4 -1.42 2.56
 11 0 -4 -1.04 2.7
 11 0 -4 -1.71 2.06
 -11 0 4 -2.29 2.45
 11 0 -4 0.01 1.78
 -11 0 3 6.3 3.56
 11 0 -3 7.64 3.33
 11 0 -3 8.14 3.65
 -11 0 3 3.89 2.6
 11 0 -3 6.16 2.8
 -11 0 2 97.18 10.96
 11 0 -2 81.91 10.05
 11 0 -2 84.48 9.06
 11 0 -2 99.62 10.42
 -11 0 2 88.82 10.44
 -11 0 1 28.37 6.46
 11 0 -1 45.02 7.34
 11 0 -1 54.41 8.32
 -11 0 1 36.25 7.22
 11 0 -1 43.46 6.75
 11 0 0 80.81 9.57
 11 0 0 74.82 10.55
 11 0 0 86.02 10.59
 11 0 0 106.98 10.69
 -11 0 0 95.05 11.49
 -11 0 0 110.4 12.01
 -11 0 -1 16.4 5.6
 11 0 1 31.85 7.05
 11 0 1 18.26 5.23
 11 0 1 20.4 5.43
 -11 0 -1 15.23 5.05
 11 0 1 8.21 3.61
 -11 0 -2 10.93 4.51
 11 0 2 22.41 5.46
 11 1 -12 -4.07 3.23
 11 1 -11 2.97 2.94
 -11 1 10 8.2 4.2
 11 1 -10 7.84 3.13
 11 1 -10 13.14 4.92
 -11 1 10 11.14 4.41
 -11 1 9 15.38 4.72
 11 1 -9 15.41 4.86
 11 1 -9 8.21 3.91
 -11 1 9 14.1 4.5
 -11 1 8 18.07 4.83
 11 1 -8 15.61 4.81
 11 1 -8 17.45 5.28
 -11 1 8 16.66 4.89
 -11 1 7 47.75 7.48
 11 1 -7 56.06 8.12
 11 1 -7 65.39 9.29
 -11 1 7 65.69 8.95
 11 1 -7 43.17 5.62
 -11 1 6 8.45 3.57
 11 1 -6 0.12 2.11
 11 1 -6 9.09 3.99
 -11 1 6 1.76 2.66
 11 1 -6 4.01 2.32
 -11 1 5 50.03 7.44
 11 1 -5 37 6.95
 11 1 -5 36.84 6.76
 -11 1 5 39.99 7.06
 11 1 -5 35.73 5.49
 -11 1 4 24.14 5.36
 11 1 -4 26.34 5.98
 11 1 -4 28.83 6.24
 -11 1 4 22.51 5.46
 11 1 -4 22.24 4.53
 -11 1 3 39.92 6.98
 11 1 -3 53.08 7.9
 11 1 -3 51.41 8.07
 -11 1 3 46.65 7.5
 11 1 -3 43.8 6.36
 -11 1 2 0.08 2.34
 11 1 -2 2.47 2.88
 11 1 -2 2.77 2.92
 11 1 -2 2.6 3.08
 -11 1 2 6.43 3.47
 11 1 -1 135.9 13.86
 -11 1 1 155.7 14.55
 11 1 -1 156.16 14.23
 11 1 -1 142.07 12.08
 11 1 -1 125.61 11.97
 -11 1 1 141.8 13
 -11 1 0 7.25 4.04
 11 1 0 3.54 3.21
 11 1 0 12.46 4.78
 11 1 0 5.99 3.45
 11 1 0 4.23 2.74
 -11 1 0 8.15 4.08
 11 1 1 -0.91 2.44
 -11 1 -1 -0.41 2.44
 11 1 1 -2.36 2.79
 -11 1 -1 -2.75 3.23
 -11 1 -2 7.56 3.24
 11 1 2 4.65 3.11
 -11 1 -3 27.1 6.55
 -11 1 -3 34.19 7.68
 11 2 -12 13.97 4.74
 11 2 -11 2.45 2.54
 11 2 -10 1.6 4.03
 11 2 -10 6.52 4.17
 -11 2 10 3.98 3.22
 -11 2 10 3.92 2.73
 -11 2 9 6.98 3.25
 11 2 -9 -3.24 3.57
 -11 2 9 -0.28 2.46
 11 2 -9 -1.38 2.35
 -11 2 8 41.05 6.79
 11 2 -8 39.78 7.49
 -11 2 8 37.08 7.18
 11 2 -8 41.32 7.59
 -11 2 7 6.71 3.09
 11 2 -7 4.31 3.29
 -11 2 7 5.45 3.54
 11 2 -7 1.95 3.29
 -11 2 6 42.42 6.87
 11 2 -6 57.65 8.8
 -11 2 6 51.75 8.19
 11 2 -6 38.19 5.75
 11 2 -6 45.45 7.7
 -11 2 5 27.48 5.42
 11 2 -5 17.51 5.11
 -11 2 5 22.32 5.55
 11 2 -5 31.79 5.52
 11 2 -5 23.07 5.86
 -11 2 4 16.53 4.51
 11 2 -4 10.13 4.15
 -11 2 4 21.48 5.62
 11 2 -4 11.53 3.47
 11 2 -4 14.67 4.56
 -11 2 3 50.14 7.38
 11 2 -3 58.98 9.04
 11 2 -3 44.91 6.56
 -11 2 3 62.15 9.02
 11 2 -3 50.47 8.05
 -11 2 2 33.06 6.17
 11 2 -2 31.92 7.15
 11 2 -2 25.65 6.07
 11 2 -2 41.21 6.55
 -11 2 2 29.47 6.45
 11 2 -2 34.99 6.64
 -11 2 1 1.64 2.23
 11 2 -1 -3.41 3.6
 11 2 -1 -1.7 2.43
 11 2 -1 4.45 2.51
 11 2 -1 -0.98 2.82
 -11 2 1 4.14 3.33
 -11 2 0 16.46 4.64
 11 2 0 24.36 6.6
 11 2 0 11.39 4.18
 11 2 0 13.3 5.07
 11 2 0 20.02 4.96
 -11 2 0 15.34 5.4
 11 2 1 -1.21 2.6
 11 2 2 9.5 4.13
 11 3 -10 33.72 7.01
 -11 3 10 36.32 6.59
 11 3 -9 0.02 2.37
 11 3 -9 4.87 3.79
 -11 3 9 2.81 2.94
 -11 3 9 1.34 2.12
 11 3 -8 25.66 6.61
 11 3 -8 12.19 4.56
 -11 3 8 14.6 5.36
 -11 3 8 18.81 4.83
 -11 3 7 21.96 5.18
 11 3 -7 26.92 6.42
 11 3 -7 28.06 6.43
 -11 3 7 26.85 6.22
 -11 3 6 26.55 5.22
 11 3 -6 16.08 5.02
 11 3 -6 29.54 6.67
 -11 3 6 30.51 6.64
 11 3 -6 17.29 4.14
 -11 3 5 11.51 3.67
 11 3 -5 11.69 4.77
 11 3 -5 25.99 6.25
 11 3 -5 12.74 3.94
 -11 3 5 12.9 4.57
 11 3 -4 70.23 9.52
 11 3 -4 78.44 10.49
 11 3 -4 86.53 10.82
 11 3 -4 59.37 7.61
 -11 3 4 70.85 9.7
 -11 3 4 76.86 8.42
 11 3 -3 16.6 5.45
 11 3 -3 21.75 5.71
 11 3 -3 26.11 6.42
 11 3 -3 17.74 4.68
 -11 3 3 18.27 5.68
 11 3 -2 19.11 5.51
 11 3 -2 16.61 5.29
 11 3 -2 12.47 4.77
 11 3 -2 17.54 4.56
 -11 3 2 21.22 5.77
 11 3 -1 39.12 7.27
 11 3 -1 53.12 9.34
 11 3 -1 29.69 6.27
 -11 3 1 44.13 8.45
 11 3 0 14.05 2.82
 -11 4 8 22.89 5.96
 -11 4 7 14.68 4.8
 11 4 -6 58.65 8.98
 11 4 -6 57.92 9.27
 11 4 -6 61.71 7.72
 -11 4 6 54.97 8.58
 11 4 -5 20.18 5.58
 11 4 -5 25 6.38
 11 4 -5 19.07 4.7
 -11 4 5 17.31 5.33
 11 4 -4 12.59 4.71
 11 4 -4 11.19 3.8
 -11 4 4 8.23 4.02
 11 4 -3 33.53 7.44
 11 4 -3 15.25 4.79
 -11 4 3 26.53 6.32
 12 -3 -9 6.58 3.81
 12 -3 -8 67.6 9.55
 12 -3 -7 9.05 3.66
 -12 -3 7 12.67 4.52
 -12 -3 6 10.73 4.07
 -12 -3 5 22.04 5.57
 -12 -3 4 14.24 4.49
 -12 -3 3 5.67 3.45
 -12 -3 2 35.34 7
 12 -3 -1 10.2 4.34
 12 -2 -9 -1.38 2.27
 12 -2 -8 13.44 4.96
 -12 -2 8 10.3 4.44
 12 -2 -7 0.05 2.17
 -12 -2 7 3.22 2.87
 12 -2 -6 43.21 7.71
 -12 -2 6 58.74 8.62
 12 -2 -5 30.4 6.32
 -12 -2 5 40.43 7.28
 12 -2 -4 33.05 6.5
 -12 -2 4 41.65 7.68
 12 -2 -3 45.24 7.75
 -12 -2 3 50.95 8.33
 12 -2 -2 10.89 3.87
 -12 -2 2 6.74 3.5
 -12 -2 1 21.63 5.72
 12 -2 0 16.23 4.7
 12 -1 -9 43.55 8.28
 12 -1 -9 58.06 8.84
 -12 -1 8 15.5 4.89
 12 -1 -8 21.66 5.73
 -12 -1 8 22.86 6
 12 -1 -8 14.41 4.82
 -12 -1 7 0.62 2.63
 12 -1 -7 3.65 2.63
 -12 -1 7 2.65 2.49
 12 -1 -7 1.69 1.98
 -12 -1 6 8.91 4.09
 12 -1 -6 3.73 3.09
 -12 -1 6 10.83 3.85
 12 -1 -6 11.81 3.87
 -12 -1 5 28.47 6.62
 12 -1 -5 20.34 5.38
 -12 -1 5 24.11 5.88
 12 -1 -5 29.83 5.68
 -12 -1 4 2.5 3.6
 12 -1 -4 7.4 3.52
 -12 -1 4 1.92 2.52
 12 -1 -4 4.39 2.82
 -12 -1 3 44.22 8.21
 12 -1 -3 32.32 6.89
 -12 -1 3 36.88 7.22
 12 -1 -3 39.55 7.39
 12 -1 -3 34.07 6.25
 -12 -1 2 2.92 3.18
 12 -1 -2 8.96 3.89
 -12 -1 2 10.99 4.46
 12 -1 -2 15.22 4.65
 12 -1 -2 14.28 4.7
 12 -1 -1 10.69 4.06
 -12 -1 1 7.66 4
 12 -1 0 32.93 6.86
 12 0 -10 -1.49 3.44
 12 0 -9 27.6 6.35
 12 0 -9 34.88 7.22
 -12 0 8 11.44 4.76
 12 0 -8 8.08 3.96
 12 0 -8 13.56 5.16
 -12 0 8 8.23 3.74
 -12 0 7 3.92 3.09
 12 0 -7 12.15 4.2
 12 0 -7 2.7 2.97
 -12 0 7 15.02 5.27
 -12 0 6 51.96 8.3
 12 0 -6 43.51 7.9
 12 0 -6 42.3 7.6
 -12 0 6 47.53 7.94
 12 0 -6 47.63 6.48
 -12 0 5 2.43 3.1
 12 0 -5 7.14 3.91
 12 0 -5 10.48 4.09
 -12 0 5 10.52 4.68
 12 0 -5 11.02 3.55
 -12 0 4 10.67 4.3
 12 0 -4 3.76 3.32
 12 0 -4 10.36 4.19
 -12 0 4 8.85 3.91
 12 0 -4 7.07 3.41
 -12 0 3 54.61 8.9
 12 0 -3 60.94 8.79
 12 0 -3 69.45 9.67
 -12 0 3 59.4 9.2
 12 0 -3 65.74 8.43
 -12 0 2 25.64 6.16
 12 0 -2 18.37 5.34
 12 0 -2 15.24 4.82
 -12 0 2 13.44 4.77
 12 0 -2 17.97 4.98
 -12 0 1 11.81 4.44
 12 0 -1 12.75 4.73
 12 0 -1 23.4 6.3
 -12 1 9 46.15 8.15
 12 1 -9 43.95 7.71
 -12 1 8 12.09 4.43
 12 1 -8 21.85 5.91
 12 1 -8 19.72 5.86
 -12 1 8 29.72 6.71
 -12 1 7 3.81 2.81
 12 1 -7 0.43 2.56
 12 1 -7 7.71 3.67
 -12 1 7 1.91 3.25
 -12 1 6 9.21 3.89
 12 1 -6 9.19 3.72
 12 1 -6 4.52 3.11
 -12 1 6 5.73 3.37
 12 1 -6 6.53 2.59
 -12 1 5 23.32 5.58
 12 1 -5 29.71 6.14
 12 1 -5 25.38 6.19
 -12 1 5 21.61 5.55
 12 1 -5 33.95 5.88
 -12 1 4 -0.09 2.77
 12 1 -4 2.3 3.3
 12 1 -4 3.37 3
 -12 1 4 2.28 2.47
 12 1 -4 -0.72 2.12
 -12 1 3 33.8 6.88
 12 1 -3 33.41 6.63
 12 1 -3 23.66 6.16
 12 1 -3 40.85 6.52
 -12 1 3 26.39 6.32
 -12 1 2 7.15 3.84
 12 1 -2 3.65 2.97
 12 1 -2 13.21 4.89
 12 1 -2 8.53 3.61
 -12 1 1 10.22 4.47
 -12 1 0 30.24 6.62
 -12 2 9 3.18 3.16
 -12 2 8 10.14 3.78
 -12 2 7 2.61 2.32
 -12 2 6 48.79 7.6
 -12 2 6 39.13 7.67
 12 2 -6 31.85 5.47
 -12 2 5 29.64 6.08
 12 2 -5 40.5 7.89
 -12 2 5 35.94 7.25
 12 2 -5 30.81 5.73
 -12 2 4 34.34 6.67
 12 2 -4 39.35 6.63
 -12 2 3 47.89 7.76
 12 2 -3 46.43 7.18
 -12 2 2 7.32 3.51
 -12 2 1 29.46 5.95
 -12 3 8 68 8.88
 -12 3 7 8.32 3.94
 -12 3 6 17.3 4.63
 12 3 -5 21.24 4.89
 12 3 -4 14.39 4.1
 13 -2 -5 15.72 4.84
 13 -2 -4 24.38 6.31
 13 -1 -6 10.05 3.56
 13 -1 -5 13.76 4.51
 13 0 -6 -2.15 2.36
 13 0 -5 0.63 2.94
 13 1 -6 8.65 3.32
 13 1 -5 9.38 3.76

_iucr_refine_instructions_details
;

    ty-1102.res created by SHELXL-2014/7

TITL ty-1102_a.res in P2(1)
REM Old TITL 20161107-Yan Hailong-TY-1102-1 in P2(1)
REM SHELXT solution in P2(1)
REM R1 0.153, Rweak 0.046, Alpha 0.003, Orientation as input
REM Flack x = 0.085 ( 0.023 ) from Parsons' quotients
REM Formula found by SHELXT: C12 O Cl3
CELL 0.71073 9.8618 6.3632 11.405 90 112.453 90
ZERR 2 0.0004 0.0002 0.0006 0 0.005 0
LATT -1
SYMM -X,0.5+Y,-Z
SFAC C H Cl O
UNIT 24 26 6 2
 
L.S. 30
PLAN  20
BOND $H
list 4
fmap 2
MORE -1
ACTA 52
CONF
REM <olex2.extras>
REM <HklSrc "%.\\TY-1102.hkl">
REM </olex2.extras>
 
WGHT    0.037900    0.151100
FVAR       1.16535
CL01  3    0.417715    0.269173    0.342436    11.00000    0.04340    0.06666 =
         0.05766    0.01344    0.01724   -0.00058
CL02  3    0.676525    0.198859    0.171456    11.00000    0.04629    0.04957 =
         0.08930   -0.01804    0.02253    0.00130
CL03  3    0.479796    0.748588    0.259207    11.00000    0.06336    0.04016 =
         0.11575   -0.01679    0.04477   -0.00455
O004  4    0.701039    0.711314    0.111926    11.00000    0.05108    0.07520 =
         0.06201    0.02426    0.01641   -0.00721
C005  1    0.380089    0.351423    0.182132    11.00000    0.03744    0.04145 =
         0.04522   -0.00243    0.01454   -0.00140
AFIX  13
H005  2    0.390107    0.227814    0.134813    11.00000   -1.20000
AFIX   0
C006  1    0.908758    0.611974    0.290118    11.00000    0.03906    0.05040 =
         0.04447   -0.00179    0.02088   -0.00320
C007  1    0.491460    0.512374    0.178497    11.00000    0.03714    0.03910 =
         0.05069    0.00085    0.01797    0.00062
AFIX  13
H007  2    0.468691    0.548130    0.089403    11.00000   -1.20000
AFIX   0
C008  1    0.751954    0.602125    0.205328    11.00000    0.04197    0.04337 =
         0.04874   -0.00004    0.02191   -0.00325
C009  1    0.651204    0.446020    0.236336    11.00000    0.03661    0.03592 =
         0.04855   -0.00207    0.01590   -0.00165
AFIX  13
H009  2    0.682160    0.433464    0.328550    11.00000   -1.20000
AFIX   0
C00A  1    0.222168    0.427812    0.120227    11.00000    0.03632    0.05670 =
         0.05480    0.00156    0.01318    0.00080
AFIX  23
H00A  2    0.206969    0.540446    0.171216    11.00000   -1.20000
H00B  2    0.206894    0.485238    0.037349    11.00000   -1.20000
AFIX   0
C00B  1    0.990789    0.781187    0.276826    11.00000    0.04970    0.05567 =
         0.06453   -0.00202    0.02792   -0.00852
AFIX  43
H00C  2    0.946290    0.884554    0.216757    11.00000   -1.20000
AFIX   0
C00C  1    0.976293    0.460144    0.380316    11.00000    0.04300    0.06652 =
         0.05519    0.00554    0.01812   -0.00424
AFIX  43
H00D  2    0.922055    0.348022    0.391683    11.00000   -1.20000
AFIX   0
C00D  1    1.125117    0.475231    0.453880    11.00000    0.04798    0.09282 =
         0.05453    0.00848    0.01264    0.00617
AFIX  43
H00E  2    1.170997    0.371282    0.513093    11.00000   -1.20000
AFIX   0
C00E  1    1.204484    0.642554    0.439528    11.00000    0.03471    0.09698 =
         0.05751   -0.02191    0.01433   -0.01150
AFIX  43
H00F  2    1.304140    0.652173    0.489115    11.00000   -1.20000
AFIX   0
C00F  1    1.137399    0.796460    0.352064    11.00000    0.04949    0.08058 =
         0.07834   -0.01704    0.03183   -0.02280
AFIX  43
H00G  2    1.191367    0.911313    0.343752    11.00000   -1.20000
AFIX   0
C00G  1    0.109503    0.258036    0.104859    11.00000    0.03910    0.08271 =
         0.09508    0.00388    0.01619   -0.01168
AFIX 137
H00H  2    0.013123    0.312773    0.058188    11.00000   -1.50000
H00I  2    0.115863    0.212099    0.186975    11.00000   -1.50000
H00J  2    0.127949    0.141379    0.059651    11.00000   -1.50000
AFIX   0
HKLF 4
 
REM  ty-1102_a.res in P2(1)
REM R1 =  0.0354 for    2781 Fo > 4sig(Fo)  and  0.0450 for all    3193 data
REM    146 parameters refined using      1 restraints
 
END  
     
WGHT      0.0379      0.1511 

REM Highest difference peak  0.282,  deepest hole -0.274,  1-sigma level  0.044
Q1    1   0.6686  0.2685  0.0993  11.00000  0.05    0.28
Q2    1   0.4400  0.3909  0.3814  11.00000  0.05    0.18
Q3    1   0.4982  0.7584  0.1837  11.00000  0.05    0.16
Q4    1   0.3980  0.1205  0.0230  11.00000  0.05    0.15
Q5    1   0.3097  0.3766  0.1414  11.00000  0.05    0.15
Q6    1   0.5213  0.6649  0.3378  11.00000  0.05    0.14
Q7    1   1.0465  0.4947  0.4379  11.00000  0.05    0.14
Q8    1   1.3162  0.9108  0.3625  11.00000  0.05    0.14
Q9    1   0.6638  0.5847  0.4605  11.00000  0.05    0.14
Q10   1   0.4941  0.3534  0.3961  11.00000  0.05    0.14
Q11   1   0.9445  0.1544  0.4398  11.00000  0.05    0.13
Q12   1   0.4045  0.4913 -0.0237  11.00000  0.05    0.13
Q13   1   0.5050  0.4347  0.4981  11.00000  0.05    0.13
Q14   1   0.6885  0.5871  0.0780  11.00000  0.05    0.13
Q15   1   0.3986  0.8671  0.0439  11.00000  0.05    0.13
Q16   1   0.2930  0.6421  0.0432  11.00000  0.05    0.12
Q17   1   0.7043  0.5098  0.2179  11.00000  0.05    0.12
Q18   1   1.0204  0.3656  0.5015  11.00000  0.05    0.12
Q19   1   1.4109  0.9825  0.4340  11.00000  0.05    0.12
Q20   1   0.4924  0.8548  0.0462  11.00000  0.05    0.12

  REM The information below was added by Olex2.
  REM
  REM R1 = 0.0354 for 2781 Fo > 4sig(Fo) and 0.0450 for all 14590 data
  REM n/a parameters refined using n/a restraints
  REM Highest difference peak 0.28, deepest hole -0.27
  REM Mean Shift 0, Max Shift 0.000.
  
  REM +++ Tabular Listing of Refinement Information +++
  REM R1_all = 0.0450
  REM R1_gt = 0.0354
  REM wR_ref = 0.0874
  REM GOOF = 1.046
  REM Shift_max = 0.000
  REM Shift_mean = 0
  REM Reflections_all = 14590
  REM Reflections_gt = 2781
  REM Parameters = n/a
  REM Hole = -0.27
  REM Peak = 0.28
  REM Flack = -0.01(3)
  
  
;
_olex2_submission_special_instructions 'No special instructions were received'
